# Supplementary material for: GeneBag: training a cell foundation model for broad-spectrum cancer diagnosis and prognosis with bulk RNA-seq data
Source: Research Square preprint supplement (doi:10.21203/rs.3.rs-5720342/v1), 2025-03-19
Supplement: Supplementary file 1 [file 204ded8deb4d3cfe91d45114.xlsx]

## Sheet: Zero-shot learning results
Table S1 Statistical Results of Zero-shot Learning Task
	No. of Predicted Normal Samples	No. of Predicted Tumor Samples
No. of Normal Samples	13047	637
No. of Tumor Samples	32	3766
Sum of Prediction	13079	4403
% of Correct Prediction	0.997553	0.855326

## Sheet: Zero-shot learning - details
Table S2 Prediction of Each Tumor Type in the Validation set in the Zero-shot Learning Task
Tissue/Cancer Type	Expected Sample Size	No. of Correct Predictions	No. of Incorrect Predictions	% of Correct Prediction
Adipose Tissue	1293	1293	0	1
Adrenal Gland	274	274	0	1
Adrenocortical Carcinoma	79	79	0	1
Bladder	21	21	0	1
Bladder Urothelial Carcinoma	414	413	1	0.997585
Blood	1048	847	201	0.808206
Blood Vessel	1398	1397	1	0.999285
Bone Marrow	204	32	172	0.156863
Brain	2931	2817	114	0.961105
Brain Lower Grade Glioma	514	507	7	0.986381
Cervical Squamous Cell Carcinoma and Endocervical Adenocarcinoma	304	304	0	1
Cervix Uteri	19	19	0	1
Cholangiocarcinoma	36	36	0	1
Fallopian Tube	9	9	0	1
Glioblastoma Multiforme	157	151	6	0.961783
Head and Neck Squamous Cell Carcinoma	502	501	1	0.998008
Heart	942	941	1	0.998938
Lymphoid Neoplasm Diffuse Large B-cell Lymphoma	48	48	0	1
Mesothelioma	87	86	1	0.988506
Muscle	881	880	1	0.998865
Nerve	659	659	0	1
Ovarian Serous Cystadenocarcinoma	422	412	10	0.976303
Ovary	195	195	0	1
Pancreas	360	360	0	1
Pancreatic Adenocarcinoma	178	178	0	1
Pheochromocytoma and Paraganglioma	179	179	0	1
Pituitary	301	301	0	1
Rectum Adenocarcinoma	166	166	0	1
Salivary Gland	178	178	0	1
Sarcoma	259	253	6	0.976834
Skin	1940	1794	146	0.924742
Skin Cutaneous Melanoma	103	103	0	1
Small Intestine	193	193	0	1
Spleen	255	254	1	0.996078
Testicular Germ Cell Tumors	150	150	0	1
Testis	410	410	0	1
Thymoma	120	120	0	1
Uveal Melanoma	80	80	0	1
Vagina	173	173	0	1

## Sheet: 1-,3-,5-Survival Prediction
Table S3 1-, 3- and 5-Year Survival Prediction Statistics of the GeneBag model
	1-Year	3-Year	5-Year
Survival Rate	0.8899	0.6046	0.3832
Accuracy	0.7509	0.7477	0.7494
AUC	0.7698	0.8281	0.8042
F1	0.56	0.74	0.74

## Sheet: Survival prediction
Table S4 Tumor Survival Prediction of Each Tumor Type
Study Abbreviation	Study Name	Acc. of Prediction	No. of Samples
ACC	Adrenocortical carcinoma	0.7333	15
BLCA	Bladder Urothelial Carcinoma	0.7179	39
BRCA	Breast invasive carcinoma	0.8167	60
CESC	Cervical squamous cell carcinoma and endocervical adenocarcinoma	0.7857	14
COAD	Colon adenocarcinoma	0.68	25
ESCA	Esophageal carcinoma	0.9375	16
GBM	Glioblastoma multiforme	1	28
HNSC	Head and Neck squamous cell carcinoma	0.6458	48
KICH	Kidney Chromophobe	0.9	10
KIRC	Kidney renal clear cell carcinoma	0.6618	68
KIRP	Kidney renal papillary cell carcinoma	0.7857	14
LAML	Acute Myeloid Leukemia	0.8667	15
LGG	Brain Lower Grade Glioma	0.7742	31
LIHC	Liver hepatocellular carcinoma	0.7714	35
LUAD	Lung adenocarcinoma	0.6667	45
LUSC	Lung squamous cell carcinoma	0.6338	71
MESO	Mesothelioma	1	17
OV	Ovarian serous cystadenocarcinoma	0.5763	59
PAAD	Pancreatic adenocarcinoma	0.9	30
PRAD	Prostate adenocarcinoma	0.8667	15
READ	Rectum adenocarcinoma	0.7273	11
SARC	Sarcoma	0.8065	31
STAD	Stomach adenocarcinoma	0.9259	27
TGCT	Testicular Germ Cell Tumors	0.9231	13
THCA	Thyroid carcinoma	0.8696	23
UCEC	Uterine Corpus Endometrial Carcinoma	0.7	40
