# Supplementary material for: GeneBag: training a cell foundation model for broad-spectrum cancer diagnosis and prognosis with bulk RNA-seq data
Source: Research Square preprint supplement (doi:10.21203/rs.3.rs-5720342/v1), 2025-03-19
Supplement: Supplementary file 2 [file 2451dcddcd30d2cb34f5aa45.docx]

Supplementary Figures for

**GeneBag: training a cell foundation model for broad-spectrum cancer diagnosis and prognosis with bulk RNA-seq data**

**
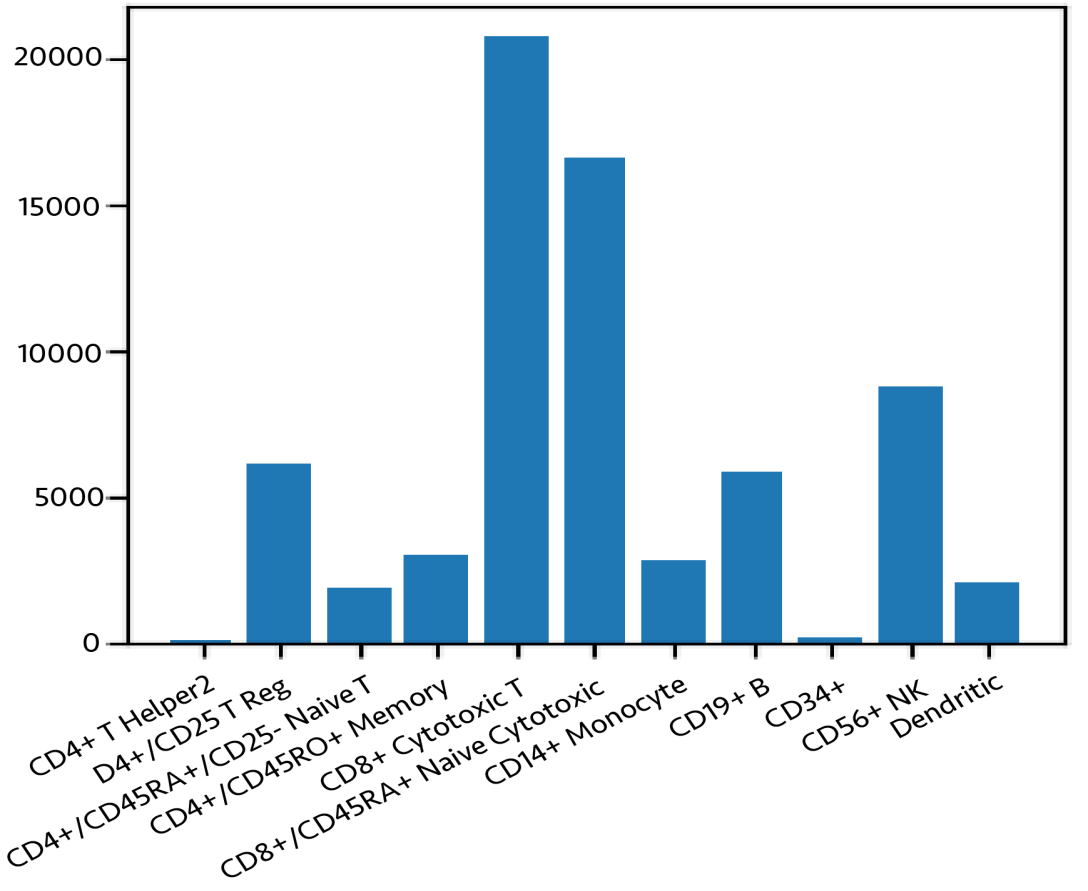
**

**Figure S1 The number of each cell type in the Zheng68K.** The dataset consists of 11 cell types, totaling 68,450 cells.


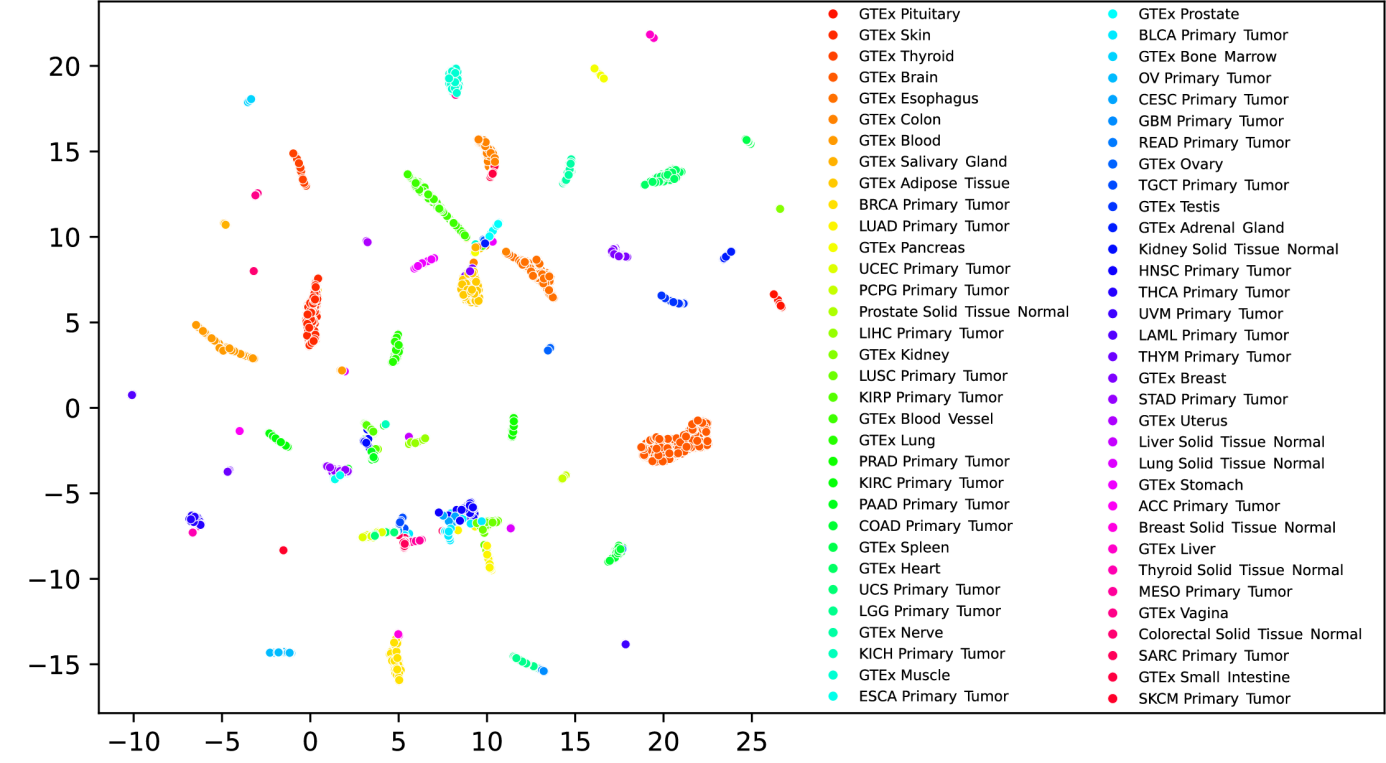


**Figure S2 Tissue classification.** Inference on normal and tumor samples (GTEx and TCGA database) was done with a classifier. The last layer of the classifier was used for producing UMAP. Colors represent the ground truth of the sample types.


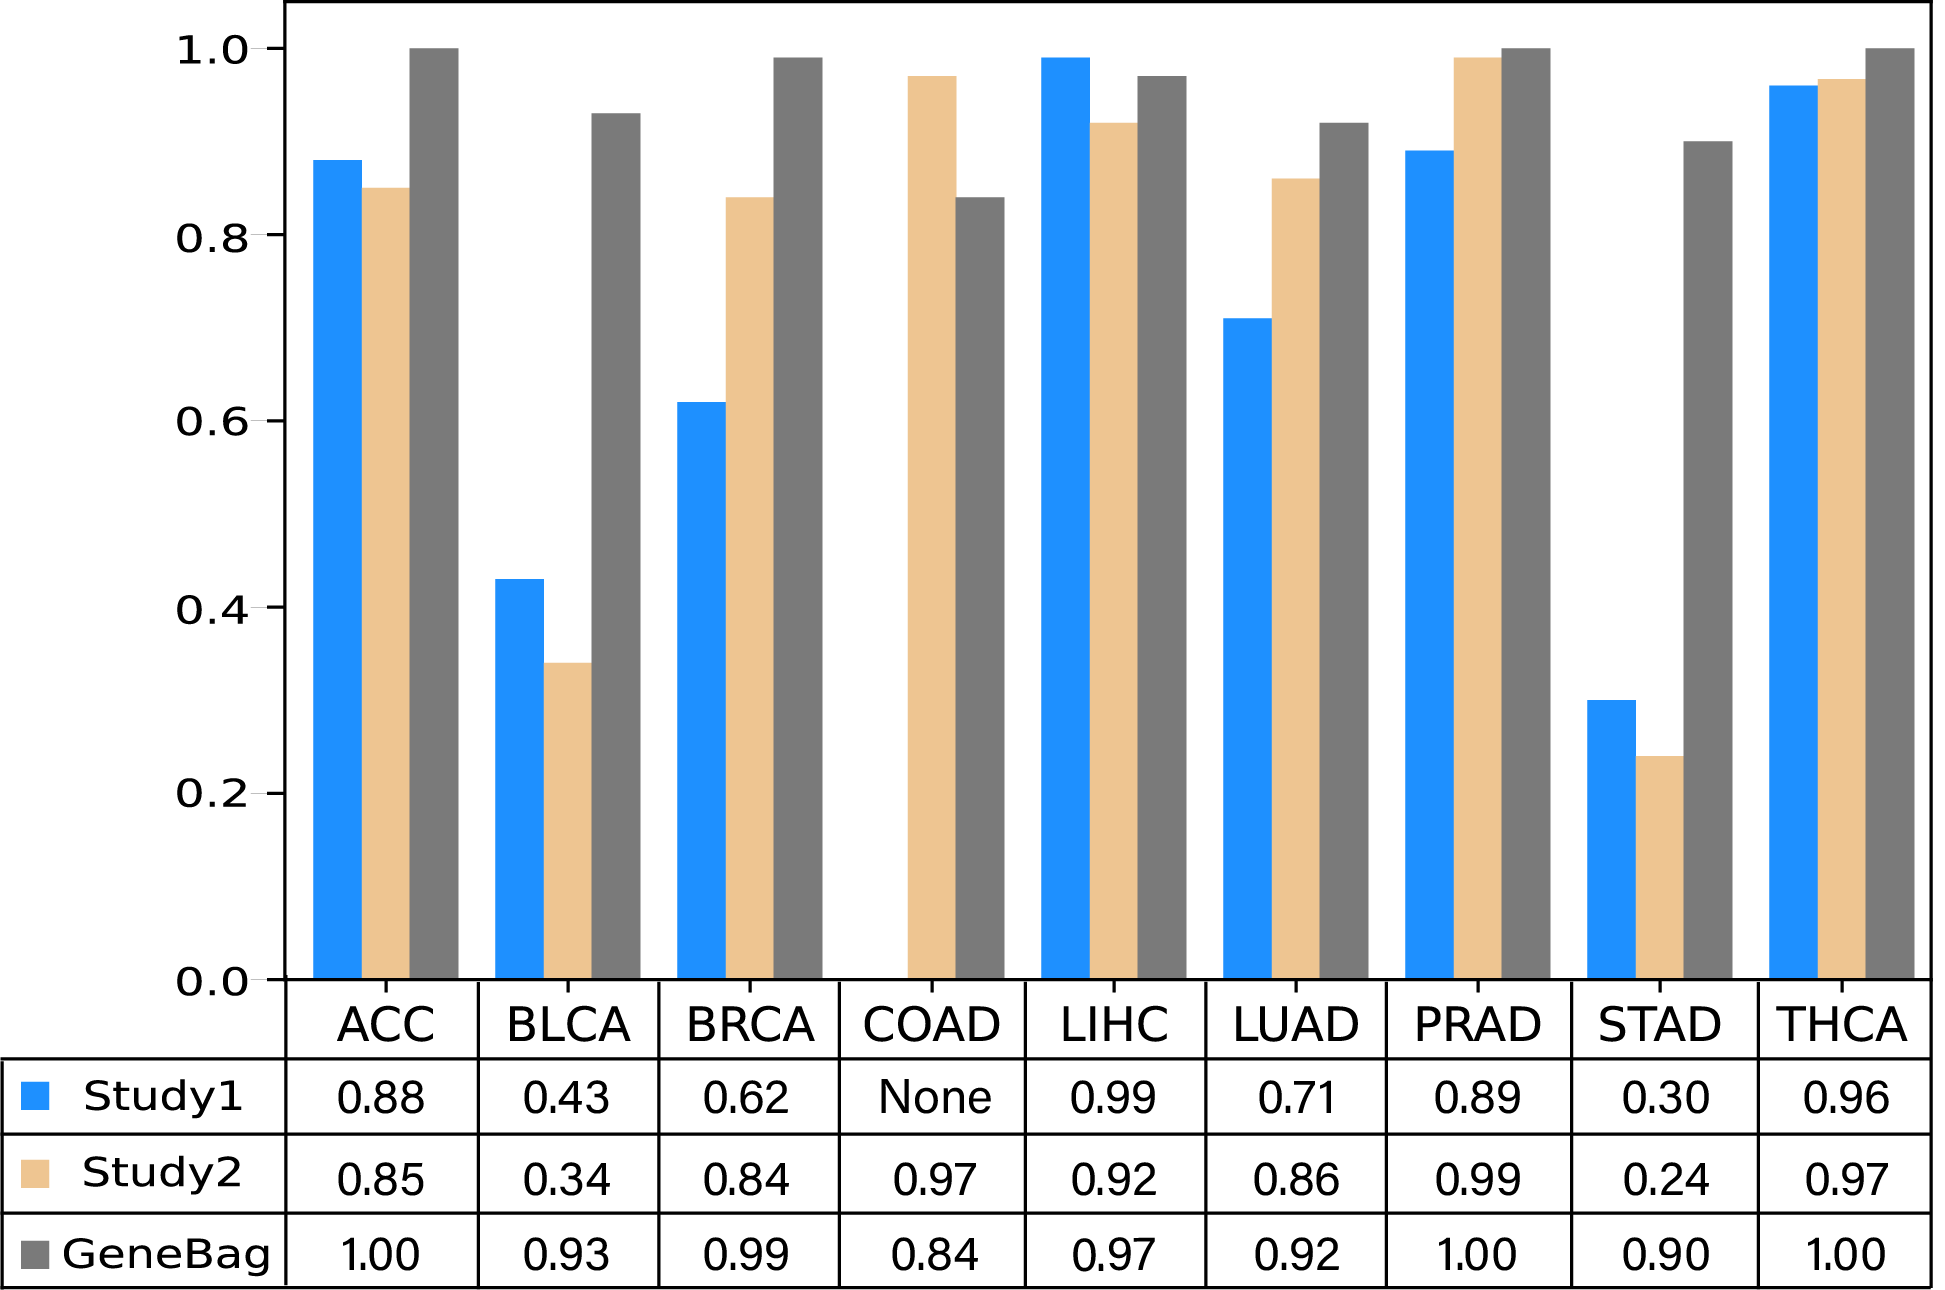


**Figure S3 Comparison of identification accuracy of selected tumor types.** Nine tumor types shared by our model and two previous studies are selected fo comparison.


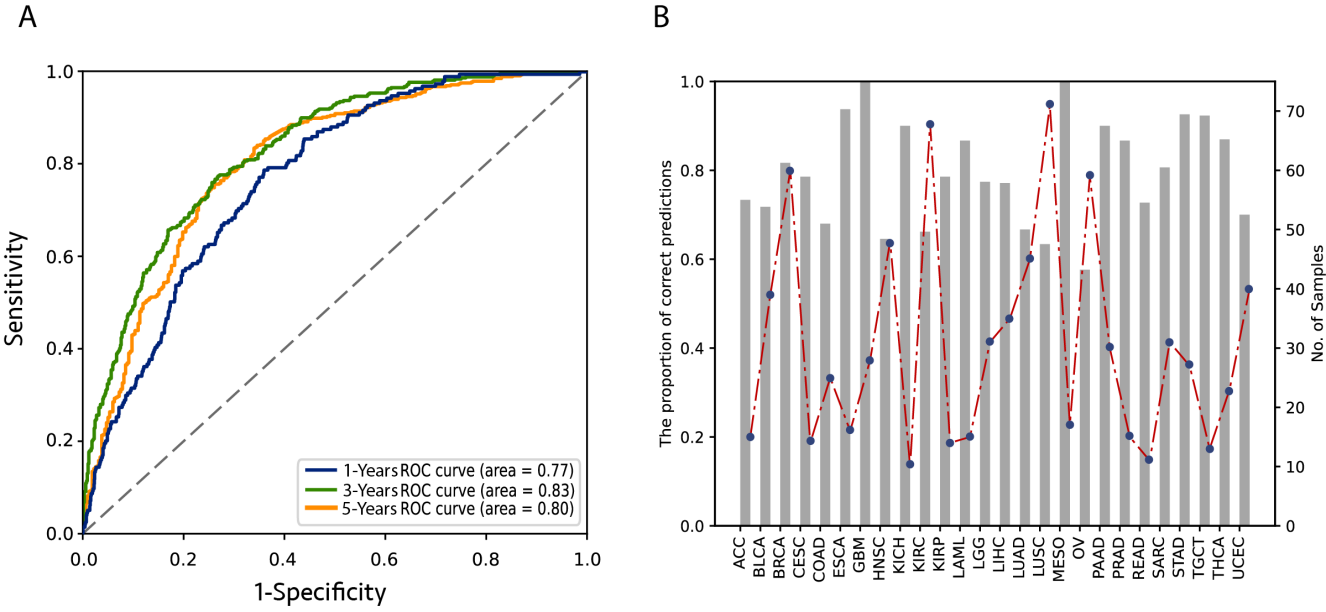


**Figure S4 Survival prediction of cancer patients.** A.Blue, green and orange represent the ROC curves of the GeneBag model’s survival predictions at 1, 3 and 5 years, respectively. B. 5-year survival predictions for various tumor types. Bar-plot shows the predicted accuracy of each tumor type, dash-line shows the sample number of each tumor type.
