# Supplementary material for: GeneBag: training a cell foundation model for broad-spectrum cancer diagnosis and prognosis with bulk RNA-seq data
Source: Research Square preprint supplement (doi:10.21203/rs.3.rs-5720342/v1), 2025-03-19
Supplement: Supplementary file 3 [file fbcf347edefd908cace3b7bd.xlsx]

## Sheet: Zheng68K
Table S1 Zheng68K Data used for Cell Annotation
Cells' Barcode	CellType
TGCTTAACAAACGA-7	CD4+/CD45RA+/CD25- Naive T
CGTACCACTCACCC-4	CD56+ NK
CAACCGCTGCAGAG-4	CD19+ B
GTCCAAGAACCAGT-4	CD14+ Monocyte
TGACTTACTCTTCA-6	CD14+ Monocyte
CGACAAACTACTGG-2	CD4+/CD45RO+ Memory
AATACCCTCCTCCA-6	CD4+/CD25 T Reg
GATGCATGAGTCGT-6	CD8+ Cytotoxic T
TCATCAACACCTCC-2	CD8+/CD45RA+ Naive Cytotoxic
CAGAGGGATGGAGG-4	CD8+ Cytotoxic T
CTAACACTGTACAC-5	CD8+ Cytotoxic T
AGCTGAACCTTGAG-1	CD4+/CD25 T Reg
AAAGCCTGGTTCAG-6	CD8+ Cytotoxic T
AGATATTGCCTCGT-2	CD8+ Cytotoxic T
CACAGATGTCCTCG-1	CD19+ B
GGCTAAACGTGTAC-3	CD56+ NK
TCTCAAACCTGAAC-6	CD19+ B
AGCTGTGATCAGAC-6	CD4+/CD45RO+ Memory
ATCACACTGTGAGG-2	CD4+/CD45RO+ Memory
CAACTTTGCCGTAA-3	CD8+/CD45RA+ Naive Cytotoxic
CGAGTATGCTTCTA-2	CD19+ B
ATTACCTGGACACT-5	Dendritic
CATTTCGAACCTTT-6	CD8+ Cytotoxic T
ATTGATGATCGCTC-8	CD4+/CD25 T Reg
GCAGTCCTAAGGTA-1	CD14+ Monocyte
GATCCGCTCATTGG-6	CD56+ NK
CATCTCCTAGCCAT-6	CD8+/CD45RA+ Naive Cytotoxic
CCTTCACTGCCAAT-8	CD4+/CD25 T Reg
AATCCTTGTTTCAC-7	CD4+/CD45RA+/CD25- Naive T
ACCGAAACGACACT-5	CD4+/CD25 T Reg
TAAATCGAAACCGT-5	CD14+ Monocyte
ATTCCAACGGATTC-4	CD8+ Cytotoxic T
GAGAAATGGAAAGT-5	CD8+/CD45RA+ Naive Cytotoxic
AGAACAGAGGGACA-8	CD4+/CD25 T Reg
GCGTAATGCTTGGA-2	Dendritic
CATTGTACCGTTAG-4	CD4+/CD25 T Reg
GAGGACGATGGAGG-6	CD4+/CD25 T Reg
AATCCTTGTGACCA-7	CD4+/CD45RO+ Memory
TAAATGTGGTTACG-6	Dendritic
GTTATAGATTTCTG-7	CD34+
ACTTCAACACGCAT-1	CD4+/CD45RO+ Memory
TCATCAACGTCTAG-6	CD56+ NK
CAGTTACTTGTCAG-2	CD4+/CD25 T Reg
ACTACGGATCGCAA-4	CD56+ NK
ACCAGCCTATCTCT-6	CD14+ Monocyte
CACGACCTGGGAGT-7	CD19+ B
TTGAGGTGTCTTAC-5	CD34+
CCATTAACCTGTCC-5	CD4+/CD25 T Reg
TCGTGAGAGGGCAA-4	CD56+ NK
ATTTAGGAGAATAG-3	CD8+ Cytotoxic T
GGCTACCTCGTAGT-2	CD56+ NK
ATCGCCACTGGAAA-1	CD14+ Monocyte
GTTATGCTTAGAGA-7	CD8+ Cytotoxic T
CTGTGAGAGGTTTG-4	CD19+ B
CTACAACTCCTCAC-8	CD8+/CD45RA+ Naive Cytotoxic
GTTAACCTTGGTAC-2	CD8+ Cytotoxic T
TATACCACTGGCAT-6	CD4+/CD45RA+/CD25- Naive T
CCCTGATGTTCTAC-3	CD56+ NK
CCAGAAACGAACCT-7	CD4+/CD25 T Reg
GCGGAGCTGTATGC-7	CD8+ Cytotoxic T
CCCAGTTGGTGTTG-5	Dendritic
TTGGAGACTGTCTT-5	CD19+ B
ACGGAACTTCGACA-1	CD4+/CD45RA+/CD25- Naive T
CGAATCGACACTGA-5	CD4+/CD25 T Reg
GAAGATGAGGCATT-1	CD4+/CD25 T Reg
GATCTACTAGTCAC-6	CD56+ NK
GTAGCAACGGTCTA-7	CD19+ B
CACTCTCTAGCGTT-7	CD4+/CD45RA+/CD25- Naive T
ACTCAGGACCATGA-5	CD56+ NK
GCTCCATGAGGTCT-1	CD4+/CD25 T Reg
CTCCACGACTGTGA-4	CD4+/CD25 T Reg
GCAGGCACTTGTCT-8	CD19+ B
CGAATCGACTACTT-6	CD19+ B
CGTGATGAAAGAGT-8	CD8+/CD45RA+ Naive Cytotoxic
CTAGGCCTCGCTAA-7	CD56+ NK
TATCAAGACTACTT-1	CD4+/CD25 T Reg
GACTTTACAACGTC-1	CD56+ NK
GACGAGGACGTAAC-6	CD14+ Monocyte
ACGGATTGTCGATG-1	CD8+/CD45RA+ Naive Cytotoxic
AGGCCTCTAGATGA-4	CD8+/CD45RA+ Naive Cytotoxic
TTCTCAGAACGCAT-8	CD4+/CD45RA+/CD25- Naive T
GACTGAACGGGCAA-7	CD56+ NK
TTGTCATGTCACGA-1	CD19+ B
ATGAGCACGAGATA-1	Dendritic
GCTACAGAGATACC-8	CD4+/CD25 T Reg
GATCTACTCTCTTA-7	CD8+/CD45RA+ Naive Cytotoxic
GCGCGATGGTGAGG-5	CD8+/CD45RA+ Naive Cytotoxic
CATTGTTGACGGGA-8	CD14+ Monocyte
GGTCAAACACTAGC-2	CD4+/CD25 T Reg
TAATGCCTTTCAGG-8	CD4+/CD25 T Reg
CGGACTCTCTGATG-1	CD19+ B
ATTGCTACTCGCCT-4	Dendritic
CTTAGGGAACGTTG-6	CD8+ Cytotoxic T
GTCCCATGTCACCC-6	CD8+/CD45RA+ Naive Cytotoxic
AGGAACCTATTCCT-1	CD8+/CD45RA+ Naive Cytotoxic
GGGCAGCTTTCCGC-2	Dendritic
GACGCTCTCAGAGG-7	CD4+/CD25 T Reg
TTGCTAACGTACCA-2	CD19+ B
AGCAAGCTGGAACG-4	CD56+ NK
ACCAACGAGGTATC-4	CD8+ Cytotoxic T
CGCTACTGTCTACT-7	CD19+ B
CATGAGACGCGATT-3	CD4+/CD25 T Reg
AGTAGGCTTGCCAA-2	CD14+ Monocyte
ATGCCAGAGCGAGA-3	CD8+/CD45RA+ Naive Cytotoxic
AAATTCGACTGACA-3	CD4+/CD45RO+ Memory
AGCCGGTGAGTACC-5	CD56+ NK
GCGACTCTAGGTTC-8	CD8+/CD45RA+ Naive Cytotoxic
ACGACCCTTGAGGG-4	CD8+ Cytotoxic T
CCTTTAGACTGTCC-3	CD8+/CD45RA+ Naive Cytotoxic
TCCCGATGGTCATG-7	CD4+/CD25 T Reg
CCATGCTGCTATTC-7	CD8+/CD45RA+ Naive Cytotoxic
ATCAACCTCTCATT-2	CD4+/CD25 T Reg
CTGAAGTGCTGGTA-2	CD19+ B
CTGACCACGGTTTG-3	CD4+/CD45RO+ Memory
ATAGTCCTCGGTAT-5	CD19+ B
GAACGGGATGAGGG-1	CD56+ NK
CAGAGGGAACACAC-8	CD8+ Cytotoxic T
TAGGAGCTGTCGTA-5	CD8+/CD45RA+ Naive Cytotoxic
TTCATTCTGCTCCT-3	CD8+ Cytotoxic T
GAGGGAACTGTCAG-6	CD4+/CD45RO+ Memory
CATTGTACTCCCGT-6	CD8+ Cytotoxic T
GGAATCTGGCTCCT-5	CD19+ B
AAATACTGCTGACA-5	CD4+/CD25 T Reg
AGTTTCACTCTAGG-3	CD56+ NK
TTAGACCTCTATGG-3	CD4+/CD45RA+/CD25- Naive T
CATGAGACATACCG-7	CD8+/CD45RA+ Naive Cytotoxic
AAATGTTGACGGTT-1	CD19+ B
GGTATCGACAAGCT-2	CD4+/CD45RO+ Memory
CAGATGACCTGGAT-7	CD4+/CD45RA+/CD25- Naive T
CCTGAGCTTTGAGC-1	CD8+ Cytotoxic T
GGAGTTTGCAAGCT-6	CD4+/CD45RO+ Memory
TGAGTCGATCCTAT-8	CD8+ Cytotoxic T
ATACTCTGTCAAGC-4	CD8+ Cytotoxic T
ATCGCCTGCCATGA-6	CD14+ Monocyte
GGCCGATGAGGCGA-2	CD56+ NK
CTATGACTTGCAGT-2	CD8+/CD45RA+ Naive Cytotoxic
CAAGTCGAACGGGA-4	CD8+/CD45RA+ Naive Cytotoxic
TAAGCGTGCTTGCC-6	CD8+/CD45RA+ Naive Cytotoxic
TAGTTAGAGTATGC-1	CD56+ NK
TGAGTGACCTTTAC-8	CD8+ Cytotoxic T
ACGCCACTGGTATC-1	CD4+/CD45RO+ Memory
GCACTAGAGGGAGT-6	CD4+/CD45RA+/CD25- Naive T
TAAGCGTGGGTCAT-2	CD8+/CD45RA+ Naive Cytotoxic
AATAAGCTTCTACT-5	CD8+ Cytotoxic T
AAAGGCCTTCCTTA-2	CD8+/CD45RA+ Naive Cytotoxic
TGCCAAGAAAGGCG-2	CD8+/CD45RA+ Naive Cytotoxic
CATCAGGACTGTTT-5	CD4+/CD45RO+ Memory
GTAGACTGTGGAGG-1	CD19+ B
GCAACTGAGTACCA-3	CD14+ Monocyte
ATATAGTGCCCACT-6	CD14+ Monocyte
CAAGCCCTGACGTT-4	CD8+/CD45RA+ Naive Cytotoxic
ACCTCCGAAAAACG-7	CD4+/CD25 T Reg
GCCACTACGCCATA-4	CD8+/CD45RA+ Naive Cytotoxic
TCGCAGCTCTATTC-2	CD56+ NK
ATCAAATGCGTTAG-5	CD14+ Monocyte
TTTAGAGACTATGG-5	CD4+/CD25 T Reg
ATCAACCTATCACG-6	CD8+ Cytotoxic T
GACTGAACAGCCTA-6	CD4+/CD25 T Reg
GGCGACTGACAGTC-4	CD8+/CD45RA+ Naive Cytotoxic
ATTGATGAATGGTC-2	CD14+ Monocyte
TGAGACACCTACTT-1	CD8+/CD45RA+ Naive Cytotoxic
AAAGACGAGAGAGC-8	CD19+ B
CCCAGTTGTGCATG-6	CD4+/CD45RO+ Memory
AGGACTTGTTCCCG-1	CD4+/CD45RO+ Memory
TTGAGGACGCGAAG-6	CD56+ NK
TTGCATTGCTACGA-2	CD56+ NK
AGAAACGAACACTG-5	CD8+ Cytotoxic T
CGCACTACGGTTTG-3	CD8+ Cytotoxic T
TAGAATTGTACGCA-6	CD4+/CD25 T Reg
CGCGGATGTGAGGG-8	CD4+/CD25 T Reg
AGTTTGCTCTCTAT-3	CD8+/CD45RA+ Naive Cytotoxic
CATCAGGAGCCATA-1	CD19+ B
AGGTTCGAGACAGG-7	CD4+/CD45RO+ Memory
ACATCACTATTCGG-7	CD19+ B
AAGAACGATTGGCA-5	CD8+/CD45RA+ Naive Cytotoxic
AGACACACGAATGA-3	CD19+ B
ATTACCACTTGCAG-4	CD4+/CD25 T Reg
CTGTAACTAGTGCT-6	CD56+ NK
ATTGCTACGGTTTG-5	CD14+ Monocyte
CCGTAAGAACAGTC-7	CD4+/CD25 T Reg
GAGTGTTGCACACA-4	CD8+ Cytotoxic T
CTGTATACGTTGGT-8	Dendritic
TGTTACACAAAGTG-2	CD56+ NK
CAGGCCGAACCTCC-2	CD19+ B
GAAGCGGACCTCGT-4	CD4+/CD45RO+ Memory
TAGTATGAAAAAGC-4	CD56+ NK
TATCGACTGCGTTA-8	CD56+ NK
AAACCGTGGCTTAG-4	CD14+ Monocyte
AATGTTGACCGAAT-7	CD56+ NK
GTGAACACCATGCA-8	CD14+ Monocyte
AGATCGTGCATTGG-2	CD4+/CD45RO+ Memory
AAGTTATGCACCAA-7	CD56+ NK
CTACGCACTCCAGA-4	CD4+/CD25 T Reg
GAGTCTGAATTCCT-3	CD4+/CD25 T Reg
ATCCAGGATATTCC-4	CD4+/CD45RO+ Memory
ACTCTATGGCATAC-1	CD56+ NK
TCATCAACTGAAGA-4	CD4+/CD45RO+ Memory
TCGGCACTTCAGGT-4	CD56+ NK
TCCATAACCGTCTC-8	CD8+/CD45RA+ Naive Cytotoxic
GCGGACTGACTCTT-6	CD4+/CD25 T Reg
GCTGATGAATTCTC-8	CD4+/CD45RA+/CD25- Naive T
CATCTTGAAACTGC-2	CD4+/CD45RO+ Memory
GGACCGTGTATCTC-4	CD8+ Cytotoxic T
GTGTATCTGTCAAC-5	CD8+ Cytotoxic T
AGAATACTCAATCG-3	CD56+ NK
CTAAACCTGAAAGT-3	CD19+ B
TGTGAGACCTCAAG-1	CD19+ B
GAATTAACTTGTGG-7	CD8+/CD45RA+ Naive Cytotoxic
AACTCACTATCAGC-7	CD4+/CD25 T Reg
GGAGGTGATCGTAG-4	CD14+ Monocyte
AGCTCGCTCGGAGA-5	CD14+ Monocyte
CACAACGATTCGTT-1	CD8+/CD45RA+ Naive Cytotoxic
ACTTAAGAGGTTAC-6	CD4+/CD25 T Reg
GGGATGGACTGCAA-1	CD8+ Cytotoxic T
GCCATCACCCATGA-4	CD4+/CD45RA+/CD25- Naive T
TGGATTCTCTTGGA-3	CD56+ NK
ACACGATGTGGTTG-4	CD4+/CD25 T Reg
TTTAGGCTTTCAGG-6	CD19+ B
GAACGTTGAGCACT-1	CD4+/CD25 T Reg
CGAGTATGAAGAGT-7	CD4+/CD45RO+ Memory
AAGAGATGTCCAAG-2	CD4+/CD45RA+/CD25- Naive T
GGCGACACAGCCAT-7	CD56+ NK
CCAGAAACGTTCGA-1	CD19+ B
CCCTAGTGCCTCAC-8	CD8+/CD45RA+ Naive Cytotoxic
AGCGAACTTGCAAC-1	CD8+ Cytotoxic T
CATCAGGACTTGAG-1	CD4+/CD25 T Reg
AATGAGGACTCATT-4	CD8+/CD45RA+ Naive Cytotoxic
AGTCGCCTGACAAA-4	CD8+ Cytotoxic T
CATGAGACTGCCTC-1	CD4+/CD45RO+ Memory
TGGAACTGTGGTCA-6	CD8+/CD45RA+ Naive Cytotoxic
AGAACAGACTGATG-8	Dendritic
CACATGGATACGCA-1	CD4+/CD45RA+/CD25- Naive T
AGGTGGGATCAGTG-2	CD56+ NK
GCCTACACCTCGAA-3	CD8+ Cytotoxic T
GATCCCTGCTTCTA-5	CD56+ NK
ACCCGTTGGGCGAA-8	CD8+/CD45RA+ Naive Cytotoxic
AGATCGTGCCCGTT-5	CD19+ B
ATCTACACTGCATG-6	Dendritic
CACCGGGAGATAAG-3	Dendritic
GTTGACGATTGCAG-6	CD4+/CD25 T Reg
AATAGGGAGATGAA-1	CD19+ B
GTTATCTGTACGCA-6	CD19+ B
GGCACTCTTTCCAT-2	CD19+ B
GAAGCTACTGGTAC-8	CD8+/CD45RA+ Naive Cytotoxic
TTACACACGTCAAC-5	CD8+/CD45RA+ Naive Cytotoxic
CAAGCATGTAGTCG-1	CD19+ B
CCACTGACTGGAGG-3	CD8+ Cytotoxic T
ACTTCAACGGTCAT-4	CD14+ Monocyte
CTATCATGAGATGA-1	CD8+ Cytotoxic T
GTTAAATGCACTAG-3	CD4+/CD45RO+ Memory
GGTCAAACGGCGAA-5	CD8+ Cytotoxic T
ACTGAGACTTTACC-8	CD56+ NK
AGTGAAGAACGGTT-2	CD4+/CD45RA+/CD25- Naive T
AAGTGCACATGTCG-5	CD8+ Cytotoxic T
AACCACGATGCCCT-3	CD8+ Cytotoxic T
GGGAAGACGCAGTT-4	CD19+ B
CGACCGGACGCCTT-6	CD4+ T Helper2
TCCATAACATCACG-8	CD19+ B
CACGGGTGTGCTCC-2	CD4+/CD25 T Reg
GCAGTTGACGCAAT-6	CD19+ B
CGCCATTGCTGACA-2	CD8+ Cytotoxic T
GGATGTACATAAGG-4	CD8+/CD45RA+ Naive Cytotoxic
CGGCACGATCACGA-2	CD8+ Cytotoxic T
CATACTACCCTTTA-1	CD14+ Monocyte
GTGAACACCCAACA-1	CD56+ NK
TTGGTACTCGAACT-4	CD8+ Cytotoxic T
TTCACCCTTGCTCC-1	CD4+/CD45RO+ Memory
CACAGCCTTGGGAG-7	CD19+ B
AAGGTGCTGCCATA-3	CD56+ NK
GGTATGACCTTCTA-1	CD56+ NK
TACTTGACAAGGTA-5	CD56+ NK
GCAATTCTGGTAGG-2	CD14+ Monocyte
GGACCGTGAACAGA-6	CD8+ Cytotoxic T
CCCAGTTGGCCTTC-4	CD4+/CD25 T Reg
GGAAGGTGAGAATG-5	CD4+/CD45RO+ Memory
CATGGATGGTTACG-5	CD8+/CD45RA+ Naive Cytotoxic
AACTACCTTTGAGC-3	CD56+ NK
AGGCCTCTAGAAGT-8	CD8+ Cytotoxic T
ATGTAAACGTCGAT-4	CD19+ B
TACACACTTGCCCT-3	CD14+ Monocyte
TCGTAGGACCCACT-7	CD8+ Cytotoxic T
AGTGCAACACTCTT-3	CD14+ Monocyte
AGAAAGTGTCTCGC-8	CD19+ B
GGTCTAGACAGGAG-2	CD56+ NK
GTCCCATGTCGTTT-6	CD8+/CD45RA+ Naive Cytotoxic
GACAACACTCGTAG-1	CD4+/CD25 T Reg
GCGGAGCTGACAAA-3	CD56+ NK
CTAACTACGTGTAC-8	CD8+/CD45RA+ Naive Cytotoxic
AAAGGCCTAGGTTC-5	CD56+ NK
AGGACACTAGAATG-1	CD8+/CD45RA+ Naive Cytotoxic
GCAGATACTCCAGA-5	CD8+ Cytotoxic T
CAGATCGAGTCACA-1	CD14+ Monocyte
AGTAGGCTGTATCG-8	CD8+ Cytotoxic T
ACGTTGGAGGAAAT-8	CD4+/CD25 T Reg
ATACCTTGTGCACA-4	CD4+/CD25 T Reg
TAAGGGCTCTAGTG-8	CD8+ Cytotoxic T
AGCCGTCTAACCGT-1	Dendritic
CCGACACTCGTAAC-6	CD4+/CD25 T Reg
GGAGAGACTCCAGA-4	CD8+/CD45RA+ Naive Cytotoxic
GTGAGGGAAGAACA-7	CD19+ B
TTTAGAGAAAGGTA-4	CD56+ NK
AGATATTGATTCCT-2	CD4+/CD25 T Reg
AGATCTCTTCCCAC-8	CD19+ B
CTGTATACGCTAAC-8	CD8+ Cytotoxic T
GGACCGTGTGTCCC-2	CD4+/CD25 T Reg
AGAGGTCTACTAGC-8	CD8+ Cytotoxic T
TAGTCTTGCTGCAA-1	CD8+/CD45RA+ Naive Cytotoxic
ACCTATTGCCCACT-6	CD14+ Monocyte
ATTGAAACAGATCC-6	CD14+ Monocyte
TCAGACGACAGTCA-5	CD4+/CD45RA+/CD25- Naive T
TCGAGAACACTCTT-3	CD19+ B
ACGCAATGGCTACA-7	CD56+ NK
AGTCCAGATTCGGA-7	CD8+/CD45RA+ Naive Cytotoxic
CTAATGCTAGGAGC-4	CD14+ Monocyte
AAGAAGACCTCGCT-6	CD19+ B
GCAAACTGTCCCAC-1	CD4+/CD45RO+ Memory
TGTAATGATCGCTC-7	CD8+/CD45RA+ Naive Cytotoxic
GGTATGACCTACTT-7	CD4+/CD45RA+/CD25- Naive T
TACGTTACGTGCAT-8	CD56+ NK
TACCGCTGCCATAG-1	CD56+ NK
ACTCCCGAGTCAAC-1	CD8+ Cytotoxic T
TGTTAAGAACGCAT-8	CD4+/CD45RA+/CD25- Naive T
TAAGAACTGAGGGT-7	CD14+ Monocyte
TTGAGGTGTCGTGA-2	CD8+/CD45RA+ Naive Cytotoxic
ACTTGACTTCGCCT-8	CD56+ NK
GGAGCGCTAGGAGC-6	CD8+/CD45RA+ Naive Cytotoxic
AGTGTTCTGTTGTG-8	CD8+/CD45RA+ Naive Cytotoxic
CTAGATCTTTTCAC-4	CD4+/CD25 T Reg
GACCTAGAACTTTC-4	CD8+ Cytotoxic T
GAAGATGATGCTTT-1	CD8+/CD45RA+ Naive Cytotoxic
CCGACACTTCGCTC-5	CD4+/CD25 T Reg
CATGTTACCTCGAA-1	CD8+ Cytotoxic T
GGAGACGAGTCAAC-7	CD4+/CD25 T Reg
CGACTGCTGGGAGT-4	CD19+ B
GAGCGGCTAACCGT-5	CD4+/CD25 T Reg
GGTTTACTGTTTGG-6	CD19+ B
ACGAAGCTGATAGA-2	CD8+ Cytotoxic T
GTAAGCACAGCCTA-2	CD56+ NK
TGGAAGCTTGTCGA-4	CD19+ B
TCAGTACTTTGGTG-1	CD4+/CD45RO+ Memory
ATTAACGACTGCAA-5	CD56+ NK
CAAGGTTGTGGTGT-2	CD4+/CD25 T Reg
ACGAGGGAGTTACG-7	CD8+/CD45RA+ Naive Cytotoxic
GAGCGCACTTACCT-8	CD8+ Cytotoxic T
CTATCCCTAGGTCT-4	CD4+/CD25 T Reg
ATAATGACTCCTGC-1	CD4+/CD25 T Reg
ATGTTCACGAATCC-7	CD14+ Monocyte
AGTGCAACCGACAT-1	CD4+/CD45RO+ Memory
GCTTAACTTTTACC-3	CD56+ NK
CCCAACACCCCTTG-1	CD19+ B
ACACATCTTGTTTC-2	CD4+/CD45RA+/CD25- Naive T
GATTCTACACGCTA-6	CD4+/CD45RO+ Memory
CAGTTACTCAGCTA-1	CD19+ B
CCTGGACTGCCCTT-1	Dendritic
CACAGCCTCCACAA-8	CD56+ NK
AACGTCGAGAAACA-5	CD19+ B
GCTCACTGTCGTGA-8	CD8+/CD45RA+ Naive Cytotoxic
AAAGACGATCAGAC-1	CD4+/CD45RA+/CD25- Naive T
CTAATAGATAAGGA-5	CD4+/CD45RA+/CD25- Naive T
CGAGCCGAGTAGCT-4	CD8+ Cytotoxic T
GATACTCTCTTCGC-6	CD4+/CD45RA+/CD25- Naive T
TCGCACACCTGAGT-5	CD19+ B
CCTATTGATGTGCA-8	CD4+/CD45RA+/CD25- Naive T
GTAGTGACAACAGA-1	CD4+/CD25 T Reg
CAGCCTACCCCTAC-6	CD56+ NK
TCGACCTGGGGACA-5	CD19+ B
TTACGACTGGACGA-6	CD34+
CGTGAAACCACTAG-5	CD8+/CD45RA+ Naive Cytotoxic
TTGGTACTTCGCTC-8	CD4+/CD45RO+ Memory
TTCTACGACGTTGA-3	CD8+/CD45RA+ Naive Cytotoxic
GACGTCCTTGCTCC-3	CD8+/CD45RA+ Naive Cytotoxic
CGACAAACACTCAG-8	CD8+/CD45RA+ Naive Cytotoxic
ACGCGGTGTGCATG-3	CD8+/CD45RA+ Naive Cytotoxic
GCCGTACTGGATTC-4	Dendritic
ACTTGTACTCCTCG-1	CD4+/CD25 T Reg
AGGCAACTGAGCAG-6	Dendritic
CGGCGAACGCTGAT-7	CD4+/CD45RA+/CD25- Naive T
ATTGCTTGGTTTCT-4	CD8+/CD45RA+ Naive Cytotoxic
GCATGTGAAGCTAC-8	CD8+/CD45RA+ Naive Cytotoxic
TAGATTGAACCTAG-7	Dendritic
ATACCTACTATGCG-8	CD56+ NK
GCTACCTGGTTGTG-8	CD34+
ACAATCCTGCCCTT-8	CD8+/CD45RA+ Naive Cytotoxic
CCAGCGGAACCCTC-1	CD19+ B
CCACCATGCGTTAG-6	CD56+ NK
GCACAAACTGCTGA-8	CD8+/CD45RA+ Naive Cytotoxic
AAGTAACTTGGTAC-7	CD4+/CD25 T Reg
CCAATTTGTTCTAC-8	CD8+/CD45RA+ Naive Cytotoxic
GCATGTGACACCAA-3	CD19+ B
ATGGGTACCTACTT-2	CD19+ B
GGAATGCTGCCTTC-1	CD4+/CD45RO+ Memory
GAAAGCCTCGAGAG-8	CD4+/CD45RO+ Memory
CGGACTCTCCGTTC-5	CD14+ Monocyte
TCACCTCTCCCTCA-7	CD8+/CD45RA+ Naive Cytotoxic
AGTTGTCTGGTTAC-4	Dendritic
CTCCATCTCCTATT-2	CD4+/CD25 T Reg
GCGAGCACAGGTTC-5	CD19+ B
GTGGTAACCTGATG-8	CD19+ B
ATCAACCTCGGGAA-3	CD8+ Cytotoxic T
TTAGTCACTCAGAC-4	CD4+/CD25 T Reg
GGAATCTGCTCATT-1	CD19+ B
AATGGCTGGGATTC-2	CD56+ NK
GCCATGCTCATCAG-4	CD4+/CD25 T Reg
GTGTATCTTCGCTC-8	CD4+/CD45RO+ Memory
CGGCATCTCGTTGA-6	CD4+/CD45RA+/CD25- Naive T
TTGTACACGTTCGA-8	CD14+ Monocyte
GGATACTGGGATCT-7	CD56+ NK
CACTTAACCAGTCA-1	CD8+/CD45RA+ Naive Cytotoxic
ACCAGTGACTAGTG-2	CD19+ B
GATCATCTTGCTTT-3	CD56+ NK
GACGCTCTTCGCAA-5	Dendritic
TAAGATACACCAGT-1	CD8+ Cytotoxic T
ATTATGGAGAGATA-2	CD4+/CD25 T Reg
AGAACAGAGAGGCA-1	CD8+ Cytotoxic T
GTTAAATGACTCAG-2	CD8+ Cytotoxic T
AGTCCAGAAGTCGT-4	CD8+/CD45RA+ Naive Cytotoxic
TAATGTGATAGACC-4	Dendritic
GGAGGTGAGCCATA-2	CD8+ Cytotoxic T
TAGTCACTTATCGG-4	CD56+ NK
CGGACCGAAAGCAA-5	CD19+ B
AATCGGTGCTGATG-8	CD8+ Cytotoxic T
AACGCAACACGACT-6	CD8+/CD45RA+ Naive Cytotoxic
TCGGCACTTGCGTA-4	CD34+
AAGCGTACGAAACA-2	CD4+/CD45RO+ Memory
GCGCACGATCGACA-3	CD8+/CD45RA+ Naive Cytotoxic
TGTGGATGCTGTAG-7	CD8+/CD45RA+ Naive Cytotoxic
CAACCGCTGAAAGT-6	CD8+ Cytotoxic T
AAATCATGATTGGC-3	Dendritic
ATTCTGACTACGAC-3	CD34+
CGTTAACTTCCTCG-8	CD19+ B
CATTTGTGGTCACA-7	CD4+/CD25 T Reg
AAAGAGACGGAGCA-4	CD4+/CD45RO+ Memory
TCACCTCTTCTATC-7	Dendritic
CCGTACACTTCGGA-6	CD8+ Cytotoxic T
AGGACACTAGTCGT-1	CD14+ Monocyte
AGTACGTGTCAGAC-2	CD4+/CD25 T Reg
ACCGAAACGAATCC-5	CD19+ B
CAACGATGGTTCTT-3	CD8+ Cytotoxic T
TCATCATGTCCAGA-6	CD8+/CD45RA+ Naive Cytotoxic
TTGGTACTGAGCTT-6	CD4+/CD45RO+ Memory
GAGGGTGAACCTGA-2	CD8+ Cytotoxic T
GATTGGACCAGGAG-7	CD8+/CD45RA+ Naive Cytotoxic
ATAACCCTTGCAGT-2	Dendritic
TCGAATCTCGACAT-8	CD4+/CD25 T Reg
CGGCGAACTGCTAG-3	CD4+/CD25 T Reg
TGTAATGAAGACTC-2	CD19+ B
GGGTTATGTTGACG-8	CD56+ NK
CTAGGCCTCAGTCA-8	CD8+ Cytotoxic T
GAAGGGTGACTCAG-7	Dendritic
ATGGGTACTGCCCT-2	Dendritic
GAGGATCTTTTGCT-6	CD8+/CD45RA+ Naive Cytotoxic
CAAAGCTGACCTGA-7	CD8+ Cytotoxic T
AGCCTCACTTCCCG-8	CD8+ Cytotoxic T
GTTGTACTCGCAAT-1	CD4+/CD45RA+/CD25- Naive T
GCCACTACTCTCCG-6	CD4+/CD25 T Reg
GAATGCTGAGATCC-4	CD56+ NK
TATCAGCTAAAAGC-2	CD14+ Monocyte
CGATCAGATCAGTG-6	CD56+ NK
TGTATCTGCCTTAT-1	CD8+ Cytotoxic T
TGGTAGTGACGCTA-1	CD8+/CD45RA+ Naive Cytotoxic
CCAGTCTGTTGGTG-6	CD14+ Monocyte
ACAGTGACTGAACC-8	CD56+ NK
GATCTTACCCACCT-7	CD4+/CD25 T Reg
TTATCCGAACAGCT-2	CD8+/CD45RA+ Naive Cytotoxic
ATCACACTCGAACT-5	CD19+ B
CGACCTACACTAGC-6	CD8+ Cytotoxic T
CAAGTTCTTTCCAT-7	CD4+/CD25 T Reg
CACATGGACGAACT-1	CD19+ B
TCAGCAGACGGGAA-6	CD8+ Cytotoxic T
GTAGTCGAACTCTT-2	CD56+ NK
ATTCGACTGATAGA-3	CD8+/CD45RA+ Naive Cytotoxic
ATCATCTGAACGTC-2	CD56+ NK
CTAACACTAGAACA-1	CD14+ Monocyte
ATTCAGCTCGGTAT-6	CD56+ NK
AGACCTGATCGCTC-7	CD4+/CD25 T Reg
ACAGTCGATGTTCT-7	CD8+/CD45RA+ Naive Cytotoxic
GCTCAGCTGCTCCT-5	CD4+/CD25 T Reg
TCCATAACCTGAGT-8	CD8+/CD45RA+ Naive Cytotoxic
ATAGTTGAATTCCT-7	CD56+ NK
AACCGATGGGGACA-6	CD4+/CD25 T Reg
CTTAAGCTGAAACA-3	CD8+ Cytotoxic T
TATGCGGAACAGCT-6	CD56+ NK
CAGCATGATGACCA-4	Dendritic
CCTATAACAAGTAG-2	CD8+ Cytotoxic T
TAGTTCACTTTCAC-3	CD4+/CD45RA+/CD25- Naive T
ACCGTGCTGTGTCA-6	CD56+ NK
AAGTAGGACACCAA-5	CD4+/CD45RA+/CD25- Naive T
ATGATATGATACCG-6	CD4+/CD45RO+ Memory
AATTGATGCGCAAT-1	CD8+ Cytotoxic T
CGACTCACAGTGTC-2	CD34+
CGCCATTGAATCGC-2	CD56+ NK
ACTAAAACCTGATG-4	CD4+/CD45RA+/CD25- Naive T
CTCCTACTAGTTCG-8	CD8+/CD45RA+ Naive Cytotoxic
ACCCTCGATCCTTA-7	CD8+/CD45RA+ Naive Cytotoxic
TCAGTACTTGCTGA-1	CD4+/CD45RA+/CD25- Naive T
TTGCTAACGCTTCC-8	CD56+ NK
ACAGTCGAGACGTT-5	CD8+/CD45RA+ Naive Cytotoxic
CAAGTCGAGAACCT-8	CD19+ B
GAGGGATGCCGTAA-5	CD8+ Cytotoxic T
AAATACTGACCAAC-2	CD34+
GAACGGGATTCTTG-2	CD4+/CD45RO+ Memory
CTTATCGACTGTCC-3	Dendritic
AAGAATCTATGGTC-5	Dendritic
AGGGACGAGTTCAG-5	CD4+/CD25 T Reg
AGTAGAGACCTTTA-1	CD8+/CD45RA+ Naive Cytotoxic
AACGTGTGGGAGCA-6	CD8+/CD45RA+ Naive Cytotoxic
TAACAATGAAAAGC-1	CD56+ NK
TGGATTCTTATCTC-3	CD4+/CD45RO+ Memory
CGACAAACAGATGA-2	CD4+/CD25 T Reg
ATCGGTGAAGCACT-3	CD4+/CD25 T Reg
GCTAGAACTGGCAT-1	CD4+/CD25 T Reg
CACTCTCTTCCAAG-2	CD4+/CD45RO+ Memory
AGGTACACGGCAAG-4	CD56+ NK
CTTCTAGATATTCC-7	CD8+/CD45RA+ Naive Cytotoxic
CAAGCATGTTTCGT-8	CD4+/CD25 T Reg
GATAGCACTGTGCA-7	Dendritic
TCTTACGATCGCAA-8	CD8+ Cytotoxic T
GATCTTTGCTTGTT-6	CD4+/CD45RA+/CD25- Naive T
CGGATAACCCGAAT-1	CD19+ B
TCTAAGCTATGTGC-7	CD14+ Monocyte
ACTTAGCTAAAGTG-8	CD4+/CD25 T Reg
CCATAGGACCAACA-8	CD8+ Cytotoxic T
TTACACACCCCGTT-4	CD19+ B
TAGTTCACGAAACA-6	CD4+/CD45RA+/CD25- Naive T
CAACGATGATTGGC-4	CD8+ Cytotoxic T
CATCGGCTCCAACA-7	CD8+/CD45RA+ Naive Cytotoxic
CGACCTACGCTTCC-3	CD56+ NK
CAGTTGGATATGGC-6	CD56+ NK
TACGGCCTGAATGA-8	CD19+ B
TGATCGGAGGAAAT-8	CD19+ B
ACAGCAACCGACTA-5	CD19+ B
GTTTAAGAGTCATG-3	CD4+/CD25 T Reg
ATCAACCTCCAAGT-4	CD4+/CD25 T Reg
TATAAGACTTCATC-4	CD56+ NK
TGCGAAACGAACTC-7	Dendritic
TAACTAGAATTCCT-7	CD19+ B
TACTCTGATTGAGC-2	CD14+ Monocyte
TACTTGACGTAAGA-2	CD14+ Monocyte
TGCCACTGCCACCT-2	CD4+/CD45RO+ Memory
GACGCTCTGCTTCC-1	CD56+ NK
AAATCCCTCCCTTG-4	CD8+/CD45RA+ Naive Cytotoxic
TACTAAGAAGTCGT-5	CD4+/CD25 T Reg
GCTAGAACCGATAC-3	CD8+/CD45RA+ Naive Cytotoxic
CTTGTATGTCGCTC-2	CD8+ Cytotoxic T
ATGATATGGGATCT-2	CD56+ NK
CGACCTTGGTCTAG-7	CD8+ Cytotoxic T
GCGTAATGTGGTGT-5	CD56+ NK
AAGTCCGATCGCAA-8	CD56+ NK
CTAATGCTCCAGTA-5	CD8+/CD45RA+ Naive Cytotoxic
AATGCGTGTCTCGC-8	CD4+/CD25 T Reg
TGAAGCACGCGGAA-5	CD14+ Monocyte
GGACATTGTACTGG-4	CD4+/CD25 T Reg
ATCCAGGAAAGTAG-3	CD8+/CD45RA+ Naive Cytotoxic
TCAATCACGTTGGT-8	CD8+ Cytotoxic T
TGGTCAGAAGTACC-1	CD14+ Monocyte
CCAAGATGGAATGA-1	CD56+ NK
TGGTAGACTCTTCA-2	CD8+/CD45RA+ Naive Cytotoxic
GGCACTCTGAGATA-1	CD56+ NK
GTGAGGGACCTCGT-2	CD8+/CD45RA+ Naive Cytotoxic
GGACAGGAAGCACT-4	CD56+ NK
GTCCACTGAAGAGT-8	CD56+ NK
ATTGTCTGCCAACA-3	CD8+/CD45RA+ Naive Cytotoxic
TGTGATCTGACGTT-6	CD8+ Cytotoxic T
ACATCACTTGGATC-1	CD8+/CD45RA+ Naive Cytotoxic
CAATGGACTCGATG-2	CD4+/CD45RA+/CD25- Naive T
ATCGTTTGCCTTAT-2	CD8+ Cytotoxic T
AACGTGTGGGTGAG-3	CD8+/CD45RA+ Naive Cytotoxic
ACTCGAGACCAACA-4	CD14+ Monocyte
ACATACCTGAACCT-5	CD4+/CD45RA+/CD25- Naive T
CTTTAGTGAATGCC-1	CD19+ B
TGGAGGGAACCTGA-4	CD8+ Cytotoxic T
ATATACGAAAGGCG-7	CD56+ NK
CTAAGGACCTGTGA-6	CD8+ Cytotoxic T
TGCAAGACTTTCAC-7	Dendritic
CCTCATCTTTCTCA-5	CD4+/CD45RO+ Memory
CAGGTTGACTGGTA-5	Dendritic
GCTTAACTATTGGC-2	CD4+/CD25 T Reg
CGGACCGAATTTCC-3	CD19+ B
ACAAAGGAGGTGTT-8	CD56+ NK
CATCAACTGTATCG-5	CD8+ Cytotoxic T
CCTAGAGATACGAC-4	CD4+/CD25 T Reg
CACCGTACCTGGTA-5	CD4+/CD45RA+/CD25- Naive T
AAGAAGACACACTG-4	CD8+/CD45RA+ Naive Cytotoxic
ATAGAACTAGAAGT-4	CD8+/CD45RA+ Naive Cytotoxic
AAACGCTGCTTCCG-3	CD19+ B
TGAATAACTCTTTG-7	CD8+ Cytotoxic T
CGGAGGCTTCTTTG-1	CD56+ NK
CGCATAGAGCTGTA-7	CD4+/CD25 T Reg
GAGCGAGACTCCAC-1	CD56+ NK
AGGTCATGTGTTCT-2	CD4+/CD25 T Reg
CGTGAATGTCGCTC-8	Dendritic
CTGAGCCTCTGTGA-8	CD8+ Cytotoxic T
ACATCACTAGTGTC-6	Dendritic
CAGCGTCTGTTCAG-8	CD4+/CD25 T Reg
GGAAGGACTAAGCC-6	CD19+ B
AAACTTGAACCACA-7	CD4+/CD45RO+ Memory
GCGATATGCCTACC-5	CD8+/CD45RA+ Naive Cytotoxic
GACGATTGTGAGAA-7	CD14+ Monocyte
CGCAACCTGAGGCA-5	CD4+/CD25 T Reg
ACTAAAACGATGAA-4	CD19+ B
GACAGTTGGTGCAT-3	CD8+/CD45RA+ Naive Cytotoxic
AGTCACGACGTAAC-3	CD56+ NK
TATCGTACACCTGA-1	CD4+/CD45RA+/CD25- Naive T
AGGTCATGTTCTGT-6	CD4+/CD25 T Reg
TGACGCCTGAGCTT-6	CD4+/CD25 T Reg
TCGTGAGATAGCCA-3	CD4+/CD25 T Reg
GTCATACTGAACTC-3	CD19+ B
GAGGCAGAGTCTAG-4	Dendritic
CCTACCGAGTCGAT-3	CD4+/CD45RA+/CD25- Naive T
AATCCTACTGAGCT-1	CD8+ Cytotoxic T
GGACATTGCGTACA-5	Dendritic
GGAGTTTGAAAAGC-8	CD56+ NK
GTTCAGGACGTAAC-7	CD8+ Cytotoxic T
AGCGATACTACGAC-6	CD19+ B
TTGCATTGCTGGAT-6	CD56+ NK
GAGGGAACTACAGC-1	CD19+ B
AGTTGTCTTCTCGC-8	CD56+ NK
CTTACAACCCAATG-7	CD8+/CD45RA+ Naive Cytotoxic
CTAGTTACCACCAA-8	CD8+ Cytotoxic T
CTACTATGAACTGC-1	CD8+/CD45RA+ Naive Cytotoxic
GAAAGCCTCGCAAT-2	CD19+ B
CTCGACACGCAGAG-2	CD14+ Monocyte
TAGGTCGAATGCCA-1	CD56+ NK
TCAAGGTGGCTGTA-6	CD56+ NK
CTTTACGAAAGTGA-1	CD4+/CD45RO+ Memory
TCATGTACCCTCCA-3	CD8+/CD45RA+ Naive Cytotoxic
ATTACCACAGGTCT-7	CD19+ B
AAGATTACTGGATC-8	Dendritic
GCTAGATGCAGGAG-1	CD4+/CD45RA+/CD25- Naive T
TACGGAACTCACCC-2	CD56+ NK
CAGGAACTCAGAGG-6	CD8+/CD45RA+ Naive Cytotoxic
TAGCATCTTACGAC-4	CD4+/CD25 T Reg
CGTACCACGTAAAG-6	CD8+/CD45RA+ Naive Cytotoxic
AGTCTTACCTCTAT-8	CD4+/CD25 T Reg
CGCCGAGATTGCAG-1	CD14+ Monocyte
TACAAATGGCTTAG-3	CD56+ NK
CGTGAAACGTTGCA-5	CD4+/CD25 T Reg
GCGAGAGATTCCAT-1	CD56+ NK
TCGACGCTCTCTTA-5	CD4+/CD45RO+ Memory
CCCTAGTGGCGAAG-8	CD56+ NK
GACCTAGATAACCG-6	CD4+/CD45RO+ Memory
TAGTCACTAGAGAT-3	CD8+/CD45RA+ Naive Cytotoxic
GATTACCTCGGGAA-4	CD4+/CD25 T Reg
AACGTTCTTTCGTT-3	CD4+/CD45RO+ Memory
CCATGCTGAGAGTA-7	CD19+ B
TCAACACTACCTAG-4	CD19+ B
TCGACGCTCCCTCA-7	CD19+ B
ACTGTTACGGGTGA-1	CD4+/CD45RO+ Memory
CGATCAGAAAAGCA-7	CD19+ B
TTCCTAGAATGACC-2	CD19+ B
TGACGCCTCTTACT-8	CD8+ Cytotoxic T
TTACTCGACCTACC-1	CD19+ B
GGGCCAACTGTCGA-5	CD8+ Cytotoxic T
CTTACAACTTGACG-5	CD8+/CD45RA+ Naive Cytotoxic
TGACTGGACTGTTT-2	CD8+/CD45RA+ Naive Cytotoxic
ACCCACTGGTCTGA-6	CD8+ Cytotoxic T
GGCTAATGAATCGC-1	CD8+/CD45RA+ Naive Cytotoxic
TCATGTACGAGGCA-8	CD8+ Cytotoxic T
AAATTGACCTGGTA-3	CD4+/CD45RO+ Memory
AGAGCGGACTCAAG-6	CD19+ B
ACTTCTGATACTGG-2	CD8+/CD45RA+ Naive Cytotoxic
AACTTGCTTACTTC-3	CD8+/CD45RA+ Naive Cytotoxic
CTTTCAGATCCTCG-6	CD56+ NK
ATACGGACCCGTTC-4	CD4+/CD25 T Reg
CGATACGAACCAAC-2	CD4+/CD25 T Reg
CGGACCGACTAGCA-3	CD56+ NK
GGTAGTACTCGATG-7	CD19+ B
ACCACAGAAGAGGC-8	CD8+ Cytotoxic T
GTGTGATGTCTCCG-2	CD4+/CD45RA+/CD25- Naive T
GACAACTGATTCGG-2	CD4+/CD25 T Reg
CGTGAATGACCTAG-2	CD8+ Cytotoxic T
ACAAAGGAAGAGTA-3	CD8+/CD45RA+ Naive Cytotoxic
AGCGATACTGGATC-7	CD4+/CD25 T Reg
GCAATCGACCGTTC-4	CD8+ Cytotoxic T
GACAACTGACGCAT-2	CD14+ Monocyte
GGACATTGTGAGCT-8	CD19+ B
CCTACCGAGACGGA-6	CD56+ NK
TATACAGATCCGTC-4	CD4+/CD45RA+/CD25- Naive T
TTCAAGCTCCTTAT-5	CD56+ NK
CGGTAAACAGCTCA-6	CD14+ Monocyte
CTAAGGTGGAACTC-3	CD19+ B
GCAAGACTGCTTCC-2	CD8+ Cytotoxic T
TGGAGGGACGACAT-3	CD8+ Cytotoxic T
TCTACAACGAAAGT-3	CD4+/CD45RO+ Memory
GAATTAACAAGATG-5	CD8+ Cytotoxic T
TCCGAGCTACTAGC-6	CD56+ NK
CAAATTGAGGTAAA-6	CD4+/CD25 T Reg
GCTCGACTACCTAG-7	CD14+ Monocyte
AGTAGAGATCAGAC-4	CD4+/CD25 T Reg
TCTAAGCTGGGTGA-1	CD56+ NK
GGAGTTTGGCAGTT-3	CD8+/CD45RA+ Naive Cytotoxic
GGAGGCCTACAGTC-2	CD4+/CD45RO+ Memory
ACTCAGGAATCAGC-2	CD56+ NK
ACAATTGAACTACG-5	CD8+/CD45RA+ Naive Cytotoxic
TTGAATGATGTTCT-5	CD4+/CD25 T Reg
ACGTCAGAGTCTTT-5	CD19+ B
TTACGACTACCGAT-7	CD56+ NK
GATCGTGAGGACAG-7	CD19+ B
GACTGATGTGTGCA-1	CD56+ NK
AGGCAACTGGGACA-7	CD56+ NK
TCGGTAGAGTACAC-4	CD8+ Cytotoxic T
AGTTCTACGTGTTG-3	CD8+ Cytotoxic T
AATCTAGACTCGCT-8	CD8+ Cytotoxic T
AGTGACTGCATGCA-7	CD56+ NK
CAGTTACTAGAAGT-1	Dendritic
GGTACATGTTTGGG-3	CD8+/CD45RA+ Naive Cytotoxic
AGGCCTCTCCTCGT-2	CD8+/CD45RA+ Naive Cytotoxic
TACGCGCTCTTGCC-1	CD4+/CD45RO+ Memory
AAAGCCTGCCTAAG-6	Dendritic
AGCCGTCTCCAATG-7	CD14+ Monocyte
TTCAGTACCTGATG-6	CD8+/CD45RA+ Naive Cytotoxic
ACAATCCTTAAGCC-5	Dendritic
TAGGCATGACCTTT-7	Dendritic
ACGATCGACTTCTA-1	Dendritic
AGTATCCTTTCGCC-7	CD14+ Monocyte
TAGTTGCTCGAACT-3	CD4+/CD25 T Reg
GTTGAGTGTGTGCA-7	CD4+/CD25 T Reg
CGAACATGCCGATA-5	CD4+/CD45RO+ Memory
TCATCAACTCTATC-5	CD56+ NK
TTTCTACTAATGCC-7	CD8+/CD45RA+ Naive Cytotoxic
CTAATAGATACTCT-6	CD56+ NK
TAGAATTGATTGGC-8	CD4+/CD25 T Reg
AGTGACTGTGTCGA-7	CD19+ B
GTCGACCTCTTGCC-8	CD4+/CD25 T Reg
CTTAAAGACGCAAT-8	CD8+/CD45RA+ Naive Cytotoxic
TGATCACTCCACAA-6	CD19+ B
TGGTCAGATTTGCT-1	CD8+/CD45RA+ Naive Cytotoxic
TCATCCCTCTTATC-3	CD4+/CD25 T Reg
GACGATTGAGGTCT-2	CD4+/CD45RA+/CD25- Naive T
GTTGATCTGTCGAT-5	CD4+/CD45RO+ Memory
CACACCTGGGTTCA-7	CD8+ Cytotoxic T
GAAGGGTGGGTGAG-4	CD56+ NK
CGGACTCTCCGTAA-4	CD56+ NK
GACGAACTAACCAC-1	CD14+ Monocyte
CTAACACTGGAACG-1	CD14+ Monocyte
CGATACGATGAGCT-3	CD19+ B
CCCTCAGACACACA-6	CD8+/CD45RA+ Naive Cytotoxic
TACGCCACCCACAA-7	CD8+/CD45RA+ Naive Cytotoxic
GTGATCGAAGCAAA-7	CD8+/CD45RA+ Naive Cytotoxic
GACTACGAGTTGGT-5	CD4+/CD45RO+ Memory
GCGAGCACACCTGA-6	CD4+/CD25 T Reg
AACCACGAGTATCG-5	CD4+/CD45RA+/CD25- Naive T
CTGAGAACCTGGTA-3	CD8+/CD45RA+ Naive Cytotoxic
CAGTGTGAGACTAC-3	CD19+ B
TGGCACCTACCAAC-1	CD4+/CD25 T Reg
ATATGAACAGCTAC-8	CD4+/CD45RA+/CD25- Naive T
AGCGCTCTACGTAC-5	CD4+/CD25 T Reg
TAGGCATGCTGTTT-2	CD8+ Cytotoxic T
AGAGATGATCTGGA-8	CD19+ B
GTGATGACTGGGAG-4	CD4+/CD25 T Reg
TGCGCACTGCGTTA-5	CD56+ NK
GTCAATCTCAGCTA-5	CD8+/CD45RA+ Naive Cytotoxic
CGCACTTGACTAGC-4	CD4+/CD25 T Reg
ATGCCGCTTCTCGC-7	CD8+ Cytotoxic T
TCTCTAGAAGATGA-1	CD8+ Cytotoxic T
ATTGATGAAACGGG-1	CD4+/CD45RO+ Memory
ACAGTTCTAGTACC-7	CD4+/CD25 T Reg
TAGTTAGAAAGAAC-4	CD56+ NK
CAAGAAGATAGCCA-5	CD56+ NK
CTTGATTGTTCGCC-7	CD8+ Cytotoxic T
CAGTGTGACAGCTA-8	CD8+/CD45RA+ Naive Cytotoxic
TGCCAAGAAAGAAC-6	CD8+ Cytotoxic T
TGTATGCTACCTCC-4	CD56+ NK
AATGGAGATAGCCA-5	CD4+/CD45RO+ Memory
CTAATAGAGCGAAG-6	CD8+/CD45RA+ Naive Cytotoxic
GGCACGTGTCCTGC-6	CD4+/CD25 T Reg
CACTCCGATCTCAT-8	Dendritic
ACAGCAACGGTAAA-1	CD19+ B
CCATAGGACTGATG-3	CD8+/CD45RA+ Naive Cytotoxic
TATCTCGAGTATCG-7	CD8+/CD45RA+ Naive Cytotoxic
ATTTGCACGTCACA-3	CD8+/CD45RA+ Naive Cytotoxic
ACACGTGACGGAGA-3	CD56+ NK
CGCGAGACTCTTTG-1	CD14+ Monocyte
AAATTGACTCCTCG-6	Dendritic
CACTCTCTCGGTAT-7	CD8+ Cytotoxic T
TGTCAGGAAACGGG-3	CD4+/CD45RA+/CD25- Naive T
ACCGCGGAGAAGGC-4	Dendritic
ACGAGTACATCTTC-7	CD8+/CD45RA+ Naive Cytotoxic
AGTGCAACGTCAAC-4	CD14+ Monocyte
TCCACGTGTATGCG-3	CD4+/CD25 T Reg
GACGCTCTTATGCG-7	CD8+ Cytotoxic T
TGCGAAACTCAAGC-5	CD8+/CD45RA+ Naive Cytotoxic
AGCCTCTGTCGCCT-6	CD4+/CD25 T Reg
AATCAAACGCCAAT-1	CD4+/CD25 T Reg
CAGATGACAAAACG-4	CD4+/CD25 T Reg
GACGTCCTACGCAT-4	CD8+/CD45RA+ Naive Cytotoxic
ATCTGACTCAGAGG-5	CD4+/CD45RO+ Memory
CTACGCACAGGCGA-4	CD8+/CD45RA+ Naive Cytotoxic
CGCAGGTGAGCTCA-6	CD56+ NK
GCACGGACCAGCTA-1	CD8+/CD45RA+ Naive Cytotoxic
ATCGCAGAACACTG-5	CD8+/CD45RA+ Naive Cytotoxic
ACACATCTCCTCCA-2	CD8+ Cytotoxic T
TCCACTCTTGGATC-3	CD4+/CD25 T Reg
ATTTGCACTGTGGT-5	CD8+/CD45RA+ Naive Cytotoxic
GAGTACTGCCGTTC-2	CD8+/CD45RA+ Naive Cytotoxic
TCTCTAGATTGCGA-8	CD14+ Monocyte
TGCGCACTCTTATC-1	CD8+ Cytotoxic T
AATTCCTGGGGAGT-3	CD8+ Cytotoxic T
CCAGCACTTCGCTC-2	CD14+ Monocyte
ACTCTATGAGGTCT-7	CD19+ B
ACGAACACTTCGGA-3	CD19+ B
ACTCTATGTAAGGA-3	CD8+ Cytotoxic T
CTAAACCTGGATCT-8	CD8+/CD45RA+ Naive Cytotoxic
GTGTCAGAAATCGC-5	CD8+ Cytotoxic T
ACGCACCTGCAAGG-5	CD56+ NK
CGGCGAACTTTGGG-6	Dendritic
CTCCACGAGCGGAA-2	CD19+ B
CCCATGTGCCTATT-6	CD4+/CD25 T Reg
ATCGCCACGAGACG-2	CD19+ B
GACGCTCTCAGAAA-1	CD8+/CD45RA+ Naive Cytotoxic
AGAATTTGTCCAAG-2	CD4+/CD25 T Reg
CTATAGCTTACGAC-2	CD8+/CD45RA+ Naive Cytotoxic
GGAGGCCTGTGTCA-8	CD19+ B
GTTGAGTGTTCGTT-2	CD8+ Cytotoxic T
CCTTAATGGTTTCT-5	CD4+/CD25 T Reg
GAGGGAACAGCGGA-1	CD8+ Cytotoxic T
GTCTGAGATCGCCT-4	CD4+/CD45RA+/CD25- Naive T
CCCGAACTATCTCT-5	CD56+ NK
CGGATAACTCGCCT-7	CD56+ NK
TCTAAGCTTTCCGC-5	CD4+/CD45RO+ Memory
GAGCAACTAGTACC-1	CD4+/CD25 T Reg
TCGAGCCTTTTACC-2	CD19+ B
GGGTAACTGGACGA-7	CD8+ Cytotoxic T
ACTGCCACTGGCAT-7	CD14+ Monocyte
CAAGACTGACTACG-8	Dendritic
GGCTACCTCCAAGT-1	CD14+ Monocyte
AAATGGGATCCAGA-1	CD19+ B
TCGACGCTTGGATC-6	CD4+/CD25 T Reg
AGTGAAGATGTAGC-1	CD8+/CD45RA+ Naive Cytotoxic
ATATGCCTGCGAAG-6	CD8+ Cytotoxic T
TCATCCCTCACTCC-3	CD8+/CD45RA+ Naive Cytotoxic
GTAATAACGCGAAG-1	CD4+/CD45RO+ Memory
AGTAGAGAACACGT-8	CD4+/CD25 T Reg
CAGATCGAAAGGGC-2	CD19+ B
CGATAGACGGAAGC-5	CD8+/CD45RA+ Naive Cytotoxic
TCCATAACTCGACA-3	CD56+ NK
TACGCGCTGAGACG-6	Dendritic
AACGCCCTGAGGCA-1	CD4+/CD45RA+/CD25- Naive T
TGTATGCTTTACCT-1	CD14+ Monocyte
CAGCGGACGCGTTA-3	CD4+/CD45RO+ Memory
CGTCCAACTTGTCT-6	CD8+ Cytotoxic T
ATACCGGAATTTCC-4	CD4+/CD25 T Reg
TAGGCATGGTGTTG-5	CD19+ B
CTGACAGAAGCATC-1	CD4+/CD25 T Reg
TCAAGGACGATAGA-5	CD19+ B
TACCGCTGTTTCTG-2	CD19+ B
TGTAACCTATAAGG-4	CD4+/CD25 T Reg
AATGGCTGGTGCAT-1	CD8+ Cytotoxic T
TTGGGAACAAAGTG-7	CD4+/CD25 T Reg
GGAGGATGATTCGG-1	CD4+/CD45RO+ Memory
CTGATGGACTGAGT-4	CD4+/CD25 T Reg
GTGACAACTCACGA-4	CD19+ B
TGAGCAACCCACAA-8	Dendritic
CCCGGAGAACACTG-7	Dendritic
ATCATGCTGATAAG-5	CD4+/CD25 T Reg
GTTGACGACACTAG-3	CD19+ B
TCTGATACTGTCCC-6	CD4+/CD25 T Reg
AAGTGCACTGACAC-7	CD4+/CD45RO+ Memory
TGGAACACGAACCT-5	Dendritic
TGATCGGATTACTC-4	CD8+ Cytotoxic T
CTGAACGACCGAAT-2	CD14+ Monocyte
AACAAACTGTCGTA-5	CD4+/CD25 T Reg
ATGCAGTGTTGGCA-6	CD8+/CD45RA+ Naive Cytotoxic
GCTGATGATTTACC-8	CD14+ Monocyte
ATCTTGACCTAAGC-8	CD4+/CD25 T Reg
CCGCGAGACGATAC-8	CD4+/CD25 T Reg
CCTAAGGACCATAG-1	CD4+/CD45RO+ Memory
CATCAACTACGACT-4	CD19+ B
AGAATACTATGGTC-5	CD19+ B
ATAGCTCTAGGGTG-6	CD8+ Cytotoxic T
ATCACGGAATTCGG-7	CD14+ Monocyte
AGAGAATGCTTCGC-8	CD8+ Cytotoxic T
CACTTTGAGGTACT-5	CD56+ NK
AGTCGAACCAGTTG-8	CD8+ Cytotoxic T
ATTCTTCTAGGCGA-8	CD4+/CD45RA+/CD25- Naive T
GAAGTAGAAAACAG-7	CD4+/CD25 T Reg
ATGAGCACATGCTG-4	CD8+/CD45RA+ Naive Cytotoxic
CCGAAAACACCTCC-1	CD8+/CD45RA+ Naive Cytotoxic
CCCTGATGCTTCCG-4	CD19+ B
CACGCTACCCATAG-1	CD8+/CD45RA+ Naive Cytotoxic
TTCTACGAAGCACT-6	CD8+/CD45RA+ Naive Cytotoxic
GCGGGACTGAATCC-6	CD8+/CD45RA+ Naive Cytotoxic
AAATCATGGTCACA-6	CD14+ Monocyte
ATCAAATGCAGATC-6	CD56+ NK
CACAGAACGGATCT-6	CD8+ Cytotoxic T
ATTGCGGACGTGAT-5	Dendritic
AGTGTGACTGGTGT-7	CD8+/CD45RA+ Naive Cytotoxic
ATCGCCACGGTTTG-8	CD4+/CD25 T Reg
GATTCTTGAGCGTT-3	CD4+/CD45RA+/CD25- Naive T
GTAGCCCTCTCGCT-5	CD56+ NK
TCGACGCTTTGAGC-4	CD4+/CD25 T Reg
GAGCGCTGGAACTC-2	CD8+/CD45RA+ Naive Cytotoxic
GAAAGATGGTAGCT-7	CD8+ Cytotoxic T
AGGGTGGACTCGCT-7	CD8+ Cytotoxic T
CCGTACACGACGTT-5	CD8+/CD45RA+ Naive Cytotoxic
TATCAGCTAGACTC-8	CD4+/CD45RO+ Memory
GGTATGACACGTTG-5	CD8+ Cytotoxic T
TGAAGCTGACCGAT-1	CD4+/CD45RO+ Memory
AACTCGGAAGTTCG-3	CD56+ NK
CCACTGTGCCTCAC-6	CD19+ B
GCGGAGCTTAAGGA-6	CD4+/CD25 T Reg
TGTATGCTGAGAGC-5	CD4+/CD45RO+ Memory
TCGATACTAGCAAA-4	CD4+/CD25 T Reg
GCAAACTGCGCTAA-5	CD8+/CD45RA+ Naive Cytotoxic
TAAGTCCTCCTTCG-4	CD8+/CD45RA+ Naive Cytotoxic
GTAGACTGTGAGAA-3	CD8+ Cytotoxic T
GTACAGTGGCCTTC-4	CD4+/CD25 T Reg
AGGTTGTGACAGCT-8	CD14+ Monocyte
AACGGTTGAGAGGC-2	CD8+/CD45RA+ Naive Cytotoxic
CCTCATCTTTGCGA-5	CD4+/CD25 T Reg
TAAAGACTCCTTGC-3	CD8+ Cytotoxic T
AGCAAGCTTCCAAG-7	CD56+ NK
ACAAGAGAGTTCTT-4	CD14+ Monocyte
TTCTACGAAGCGGA-1	CD56+ NK
AATCTAGATGACAC-3	CD4+/CD25 T Reg
TAAGATTGAGTGTC-4	CD8+/CD45RA+ Naive Cytotoxic
GAATGCTGCACTAG-3	CD4+/CD45RA+/CD25- Naive T
GCTATACTTAACCG-5	CD4+/CD45RO+ Memory
CGTTAGGATGTCCC-2	CD19+ B
GACGAACTTTGGCA-5	CD56+ NK
TAGGCATGATCGGT-7	CD8+/CD45RA+ Naive Cytotoxic
CGTTAGGAGGTATC-7	CD8+ Cytotoxic T
CACGAAACCTTCGC-6	CD56+ NK
CGTCCAACTCGCAA-5	CD19+ B
CTCAGAGAACCTTT-7	CD4+/CD45RO+ Memory
TGCGTAGATATCTC-1	CD8+ Cytotoxic T
GCACAAACTCAGAC-4	CD56+ NK
AACGCATGCTCCAC-7	CD14+ Monocyte
AACAAACTTAGACC-4	CD56+ NK
GCAGCGTGCTGCAA-2	CD19+ B
TATAGCCTTGTGCA-2	CD4+/CD25 T Reg
TACGGCCTCCAGTA-2	CD8+/CD45RA+ Naive Cytotoxic
TTGCTAACAAGAAC-3	CD14+ Monocyte
GATGCATGGCTATG-8	CD56+ NK
ATCTACACGGTGAG-4	CD56+ NK
TGTGACGATAGAAG-2	CD8+/CD45RA+ Naive Cytotoxic
ATTATGGATTACTC-8	CD8+ Cytotoxic T
AGCGAACTCATACG-2	CD8+ Cytotoxic T
TATACAGAGTTACG-3	CD19+ B
ATCCATACGGGTGA-7	CD56+ NK
AAGCGACTGTCAAC-4	CD56+ NK
CCATATACGTCTGA-5	CD4+/CD45RA+/CD25- Naive T
TGAATAACCAAGCT-4	CD56+ NK
CCTTTAGAAGTCGT-2	CD56+ NK
GCGTAAACAACCGT-3	CD4+/CD45RO+ Memory
AAGATGGAATTGGC-6	CD4+/CD25 T Reg
CGACCTTGCTTACT-8	CD14+ Monocyte
AGTCGCCTAGGAGC-2	CD19+ B
GTCACCTGCCGTTC-6	CD56+ NK
CTATCATGGTAAGA-4	CD4+/CD45RO+ Memory
GAATGCTGCTATGG-7	CD4+/CD45RO+ Memory
ATTGAATGGGACAG-5	CD56+ NK
AAAGGCCTGAGACG-1	CD8+/CD45RA+ Naive Cytotoxic
TAAAGACTCGCCTT-6	CD56+ NK
CCATGCTGTCTGGA-2	CD8+/CD45RA+ Naive Cytotoxic
CAAACTCTATAAGG-3	CD4+/CD25 T Reg
ATTTGCACCCCACT-1	CD4+/CD45RA+/CD25- Naive T
TTCAGTACACCTTT-3	CD19+ B
AGAGAAACGACAGG-1	CD56+ NK
CGACGTCTGGACGA-6	CD56+ NK
GACGGCACAGTACC-8	CD56+ NK
AGCTGAACACTCTT-2	CD19+ B
GTGGAGGAAGACTC-2	CD4+/CD25 T Reg
ACGCCGGAACTACG-5	CD8+/CD45RA+ Naive Cytotoxic
CGTGATGATGCTCC-6	CD4+/CD25 T Reg
GTTCAGGAGCGATT-5	CD4+/CD25 T Reg
TCAGTACTCTACCC-7	CD4+/CD25 T Reg
CACTGCACCTACGA-1	CD8+/CD45RA+ Naive Cytotoxic
TTGCTATGAGCAAA-7	CD14+ Monocyte
TAGCCCACCCTCCA-8	CD4+/CD45RA+/CD25- Naive T
GCAGCCGAACTGTG-5	CD19+ B
AACCGCCTAGTGTC-3	CD8+/CD45RA+ Naive Cytotoxic
TTCTACGAGCTAAC-6	CD19+ B
TGGAGGGAGGGTGA-6	CD4+/CD25 T Reg
TAAGGGCTCCCTCA-8	Dendritic
ATCTTTCTACTAGC-1	CD8+/CD45RA+ Naive Cytotoxic
TAACACCTCTGCTC-8	CD4+/CD45RO+ Memory
GAGCGGCTCGTACA-2	CD4+/CD25 T Reg
GATGCCCTCGTAAC-4	CD19+ B
GATCGATGAAGGTA-2	CD8+/CD45RA+ Naive Cytotoxic
CCAGCACTTAAAGG-4	CD4+/CD25 T Reg
AACTCTTGCATGGT-7	Dendritic
CTTACATGTACTGG-1	CD56+ NK
GCGCACGAGAGAGC-7	CD8+/CD45RA+ Naive Cytotoxic
CTCGACACTCAGGT-8	CD8+/CD45RA+ Naive Cytotoxic
TGCCACTGACCGAT-8	CD14+ Monocyte
GGGCAGCTCCTACC-3	CD4+/CD45RO+ Memory
CAGCATGACCAGTA-5	CD8+/CD45RA+ Naive Cytotoxic
CAGAAGCTAGCGTT-5	CD56+ NK
GTGATCGAGGAGTG-2	CD4+/CD25 T Reg
CTAGGATGCAGATC-4	CD4+/CD25 T Reg
AGTTTAGAGTCGTA-4	CD4+/CD45RO+ Memory
GATAGAGAAGCATC-1	CD8+/CD45RA+ Naive Cytotoxic
GTAGCAACACCCTC-4	Dendritic
TAGGTGTGCCGTAA-3	CD4+/CD45RO+ Memory
TTACGTACGATAAG-1	CD8+ Cytotoxic T
AAATTCGAAAGGTA-1	CD8+ Cytotoxic T
TTTAGCTGCTTGTT-6	CD8+ Cytotoxic T
AACTACCTTAGAGA-7	CD8+/CD45RA+ Naive Cytotoxic
TCGCCATGAACAGA-7	CD8+ Cytotoxic T
CTATACTGGCATAC-1	CD14+ Monocyte
ATCATGCTCTTGCC-3	CD56+ NK
CGACTGCTAACGGG-7	CD19+ B
GTGCTAGATAGCGT-8	Dendritic
TTTCAGTGGTACGT-6	CD19+ B
AGCCTCACGTTGTG-4	CD8+ Cytotoxic T
ACAAATTGGACAGG-3	CD8+ Cytotoxic T
TCAGTGGAGTATCG-4	CD8+ Cytotoxic T
CATAGTCTTGATGC-3	CD14+ Monocyte
GTACTTTGGTGTAC-4	CD56+ NK
TCGACGCTGAAGGC-4	CD4+/CD25 T Reg
GCGTACCTACGGTT-1	CD19+ B
TACGCCACATTTCC-3	CD8+/CD45RA+ Naive Cytotoxic
AGGATAGAGTACAC-7	CD56+ NK
TCGATACTCCTAAG-4	CD4+/CD25 T Reg
AAGCGACTGCAGAG-1	CD8+/CD45RA+ Naive Cytotoxic
AAGGCTTGGTTTCT-4	CD8+/CD45RA+ Naive Cytotoxic
AAATTCGAAGCACT-4	CD4+/CD45RO+ Memory
GCCTGACTCTTCCG-8	CD4+/CD25 T Reg
GAGGGCCTGCAGAG-8	CD4+/CD25 T Reg
GTAGGTACTGAAGA-3	CD14+ Monocyte
GGACGCACCTTGGA-1	CD4+/CD25 T Reg
CCGCGAGAAGTAGA-6	CD14+ Monocyte
ATCCAGGAAGAGGC-1	CD4+/CD45RO+ Memory
ATTGCGGATTGCTT-5	CD4+/CD45RA+/CD25- Naive T
ATCTCAACCTTATC-1	CD4+/CD45RA+/CD25- Naive T
AGACTTCTTGCCTC-8	CD56+ NK
GAAATACTTGTTCT-3	CD4+/CD25 T Reg
AACGGTTGCCTTTA-6	CD8+ Cytotoxic T
TACGCAGAAGATGA-2	CD4+/CD25 T Reg
AGCGGGCTCGCTAA-3	CD8+ Cytotoxic T
CACCTGACCAGGAG-5	Dendritic
CATGCGCTTTGAGC-6	CD19+ B
GAAGTGCTAAGGCG-3	CD4+/CD45RO+ Memory
ATGCAGACGGAGCA-1	CD19+ B
CACAGTGATGAGCT-1	CD8+/CD45RA+ Naive Cytotoxic
CGTGAATGGGTTCA-3	CD14+ Monocyte
GCATCAGACTGGTA-5	CD4+/CD45RA+/CD25- Naive T
GAGCAACTGGTGAG-3	CD56+ NK
TAAGATACGATAGA-3	CD56+ NK
CACACCTGATCGTG-3	Dendritic
TACTCAACACGGAG-3	CD56+ NK
CGGTACCTGCGATT-6	CD4+/CD25 T Reg
CACAACGATAGCGT-1	CD8+ Cytotoxic T
CGGCATCTACGTTG-8	CD4+/CD25 T Reg
TGACGAACGCCAAT-5	CD56+ NK
GAGGGTGACCCTTG-1	CD8+ Cytotoxic T
TAACAATGGTTCGA-3	CD19+ B
ATACACCTAAAAGC-3	CD8+ Cytotoxic T
CCAGACCTGAGGTG-3	CD4+/CD45RO+ Memory
CATCTCCTTTGCAG-6	CD8+/CD45RA+ Naive Cytotoxic
CGTTATACCACCAA-5	CD4+/CD25 T Reg
AGAGAAACTTCGGA-4	CD56+ NK
TTTATCCTATGGTC-3	CD56+ NK
GAGGCCACGTAGGG-6	CD4+/CD25 T Reg
ACTTAAGACCTACC-6	CD8+ Cytotoxic T
GACGAGGACAGTCA-2	CD56+ NK
AGAAGATGGCCTTC-7	CD8+ Cytotoxic T
ACAGTCGAGACACT-5	CD19+ B
AAATTCGATGCACA-1	Dendritic
CATCCCGAAGAGAT-8	CD19+ B
CGGTAAACAACCGT-3	CD4+/CD45RO+ Memory
CAACCAGAAGTTCG-6	CD19+ B
ACGACCCTTGTCTT-6	CD4+/CD25 T Reg
CTCTAATGTAGAGA-3	CD4+/CD45RO+ Memory
ATAATCGACTTCGC-2	CD4+/CD25 T Reg
CGTCCATGGCTATG-6	CD19+ B
GCACGTCTAGCTAC-8	CD4+/CD25 T Reg
CCAGATGAGCCTTC-7	CD34+
AGTAGAGACTCTCG-3	CD8+ Cytotoxic T
TCTATGTGCGCTAA-6	CD4+/CD45RA+/CD25- Naive T
TAACACCTGTCAAC-3	CD56+ NK
AGGCAGGAGGAGCA-7	CD19+ B
AGCTCGCTCTTACT-2	CD19+ B
AACCACGAACCAAC-6	CD8+ Cytotoxic T
TGATCACTCAGCTA-6	CD19+ B
ATCCAGGACTGAGT-5	CD4+/CD25 T Reg
ATCCAGGATCTCGC-8	CD4+/CD25 T Reg
CGACTCTGCTCGCT-1	Dendritic
TTAGCTACAGTGTC-7	CD4+/CD45RO+ Memory
CTAGTTACTCCTCG-4	CD4+/CD25 T Reg
CTTGATTGAAGGTA-6	CD8+/CD45RA+ Naive Cytotoxic
TAGAATACGTTGTG-2	CD56+ NK
GATCTTTGGAAGGC-2	CD8+ Cytotoxic T
AGCGATACCATGGT-8	CD8+ Cytotoxic T
AGTGCAACACGACT-4	CD19+ B
GGAGACGATATGCG-4	CD4+/CD45RO+ Memory
AGTTATGATAGACC-2	CD8+/CD45RA+ Naive Cytotoxic
CCACCATGAGCATC-1	CD14+ Monocyte
ATGGTGACAGTACC-4	CD19+ B
ACCTCGTGTGCGTA-8	CD56+ NK
ATGCCAGAGAATGA-5	CD4+/CD45RO+ Memory
TCATGTACGTCACA-8	CD8+ Cytotoxic T
AGGCCTCTCTCTCG-6	CD4+/CD25 T Reg
ACCGTGCTTCTAGG-3	CD4+/CD45RO+ Memory
TAGGACTGTGACCA-7	CD4+/CD45RO+ Memory
TGAACCGATTTCGT-7	CD19+ B
CTGCCAACAACTGC-2	CD56+ NK
TCTAACACACGTTG-5	CD8+/CD45RA+ Naive Cytotoxic
TGATACCTGAATGA-1	CD8+/CD45RA+ Naive Cytotoxic
TACAATGAAGGTTC-1	CD19+ B
CCCAGTTGTGTGAC-6	CD8+/CD45RA+ Naive Cytotoxic
CGAGGGCTTGCAAC-5	CD56+ NK
GATGCAACAGATCC-2	CD8+ Cytotoxic T
ACTCTATGTCTATC-4	CD4+/CD25 T Reg
TAACAATGCGTCTC-6	CD8+/CD45RA+ Naive Cytotoxic
CCTTAATGCGCCTT-8	CD14+ Monocyte
CGGTCACTTCAGTG-5	CD8+/CD45RA+ Naive Cytotoxic
CGAAGACTGTAGGG-2	CD19+ B
CTTTAGTGCGACAT-8	CD56+ NK
ATCGCCTGCCTATT-2	CD14+ Monocyte
CCCTCAGACTGGTA-7	CD8+/CD45RA+ Naive Cytotoxic
TAAGTAACGAGGGT-7	CD8+ Cytotoxic T
TTGAATGATATCGG-6	CD8+/CD45RA+ Naive Cytotoxic
TAGTTAGAAACCGT-4	CD4+/CD25 T Reg
TTTCGAACGACAGG-8	CD8+/CD45RA+ Naive Cytotoxic
GTACGTGATCAAGC-4	CD4+/CD45RA+/CD25- Naive T
CGGATATGGTAGCT-1	CD4+/CD25 T Reg
GAAGTCTGGTGCAT-7	CD8+/CD45RA+ Naive Cytotoxic
ATACAATGTTCCAT-5	CD4+/CD45RA+/CD25- Naive T
GATATTGACGTTGA-6	CD19+ B
TGGAACTGCGCAAT-2	CD8+/CD45RA+ Naive Cytotoxic
TGCGATGAAACCTG-4	CD14+ Monocyte
AGCACTGAGACACT-4	Dendritic
GCACCTTGGAAACA-4	CD19+ B
GCGTACCTTGCAAC-7	CD8+/CD45RA+ Naive Cytotoxic
AATACTGATCAGAC-6	CD4+/CD25 T Reg
ACGGGAGACTAGTG-8	CD14+ Monocyte
TAATCGCTCGACTA-6	Dendritic
CTAGAGACGGAACG-5	CD56+ NK
CCAGCACTACGTTG-6	CD14+ Monocyte
GGCGGACTGTATCG-1	CD19+ B
AGATCGTGCATTGG-3	CD4+/CD25 T Reg
CTCAATTGGGAACG-5	CD8+ Cytotoxic T
TGATCGGAGGTGAG-8	CD4+/CD45RO+ Memory
TGGTCAGACTGATG-8	CD8+ Cytotoxic T
CATAAAACGCATCA-5	CD8+ Cytotoxic T
GGACAACTCCGAAT-3	CD4+/CD25 T Reg
CGTCCAACGTCGTA-5	CD4+/CD45RO+ Memory
CTATCAACCAACCA-8	CD19+ B
ACGGCGTGGAGGGT-2	CD4+/CD45RO+ Memory
TTACTCGACCGTTC-6	CD4+/CD25 T Reg
ACGGAGGAGCAGAG-1	CD8+ Cytotoxic T
CATCTCCTGAACCT-1	CD4+/CD25 T Reg
CCATGCTGTGTGCA-6	CD4+/CD25 T Reg
CACACCTGCTCTTA-2	CD14+ Monocyte
TATCGACTCAGGAG-2	CD8+/CD45RA+ Naive Cytotoxic
AGCAAAGACATTTC-4	CD8+/CD45RA+ Naive Cytotoxic
AGACCTGAAAAACG-8	CD4+/CD25 T Reg
AATAAGCTCTACCC-6	CD4+/CD25 T Reg
CCGAAAACCTTATC-4	CD19+ B
CATTACACTAGTCG-6	CD4+/CD45RA+/CD25- Naive T
CATTGACTTCATTC-3	CD8+/CD45RA+ Naive Cytotoxic
ACGTCAGAAAGCCT-7	CD8+ Cytotoxic T
TAAGCTCTCGTAGT-8	CD56+ NK
GATATAACGGTATC-8	CD8+ Cytotoxic T
TCCCGAACCTCAGA-2	CD14+ Monocyte
TGAGCTGAATGGTC-6	CD8+ Cytotoxic T
ATGAGCACGGATCT-4	CD8+ Cytotoxic T
CTATGTTGAAGAAC-6	CD14+ Monocyte
ACTAGGTGCTGATG-4	CD56+ NK
CTGACCACACAGTC-5	CD8+ Cytotoxic T
TAAATCGAGCCCTT-1	CD56+ NK
CTACCTCTCCATAG-8	CD4+/CD25 T Reg
CACTGCTGGTAGGG-7	CD4+/CD45RO+ Memory
ACATTCTGAGTCTG-7	CD19+ B
CCCTTACTTGTAGC-7	CD19+ B
CCTAGAGAGCCCTT-3	CD4+/CD45RA+/CD25- Naive T
GCACGGACTGGAAA-7	CD4+/CD25 T Reg
CCATCCGACGCAAT-6	CD8+ Cytotoxic T
TACGGAACAAAGCA-5	CD8+ Cytotoxic T
AGGCAGGACCTTCG-4	CD8+ Cytotoxic T
TTAGGGACACCTGA-5	CD4+/CD25 T Reg
CATGTACTTTTACC-5	CD4+/CD25 T Reg
TAAGCTCTCTCCCA-6	CD4+/CD45RA+/CD25- Naive T
AACAATACAAGGCG-6	CD56+ NK
GAAAGATGTGCTTT-1	CD8+ Cytotoxic T
TGACACGAGGACTT-1	CD56+ NK
TAGGCAACCGTGTA-4	CD8+/CD45RA+ Naive Cytotoxic
ATTCCATGCACCAA-3	CD56+ NK
TAGGTTCTAGCCAT-7	CD19+ B
AGCCTCTGCCAAGT-6	CD8+ Cytotoxic T
CTTGAGGATGCGTA-5	CD8+ Cytotoxic T
CTACGGCTCACCAA-3	CD56+ NK
TCCTACCTTCTCGC-3	CD8+/CD45RA+ Naive Cytotoxic
GAAGTGCTTTCAGG-5	CD56+ NK
TCAGTACTAGCACT-5	CD4+/CD45RO+ Memory
ATGCAGACCTTTAC-3	CD56+ NK
TATAGATGGTCGTA-5	CD19+ B
GCCGGAACGTTCTT-2	CD4+/CD25 T Reg
CTTAGACTTGGTTG-2	CD4+/CD45RO+ Memory
TGTGAGACTTTCTG-1	CD19+ B
CACGGGTGCTATTC-8	CD8+ Cytotoxic T
CTCGCATGGCTTAG-6	CD4+/CD45RO+ Memory
TTTCAGTGGAAACA-6	CD4+/CD25 T Reg
TCGGTAGATCCAAG-7	CD4+/CD45RA+/CD25- Naive T
CTTAGACTCGTAGT-3	CD4+/CD45RA+/CD25- Naive T
ACTGTTACTGAAGA-4	CD8+ Cytotoxic T
CCGCTATGAAGTGA-5	CD4+/CD45RA+/CD25- Naive T
ATCGCCACATGACC-7	CD4+/CD25 T Reg
AGAAACGATGGTGT-6	CD56+ NK
AATGCGTGTTGACG-8	CD4+/CD45RA+/CD25- Naive T
TGGAAAGATGGCAT-2	CD8+/CD45RA+ Naive Cytotoxic
TACCGAGATCACCC-6	CD14+ Monocyte
CATGTTACACGGTT-3	CD14+ Monocyte
GAAGTGCTGAGCAG-6	CD4+/CD25 T Reg
TAGCGATGTTGGCA-4	CD4+/CD25 T Reg
TGTAACCTTGTCCC-1	CD8+/CD45RA+ Naive Cytotoxic
CTGATACTAAGAAC-6	CD19+ B
CAAGTTCTGGTAGG-2	CD8+/CD45RA+ Naive Cytotoxic
ATCTGACTTGACCA-2	CD4+/CD45RO+ Memory
GGGCAGCTTGTGAC-8	CD4+/CD25 T Reg
GAAGGTCTTCGATG-7	CD14+ Monocyte
CCCAGACTTAGAAG-3	CD8+/CD45RA+ Naive Cytotoxic
TTACAGCTAGGCGA-7	CD8+ Cytotoxic T
CGCTCATGACCTCC-3	CD19+ B
ACGTCAGATCGTTT-2	Dendritic
TTCTAGTGGAACCT-6	CD4+/CD45RO+ Memory
ATATGAACGTCTTT-4	CD8+ Cytotoxic T
TACTACACTGAGGG-5	CD8+ Cytotoxic T
GACCTAGATCGTAG-1	CD8+/CD45RA+ Naive Cytotoxic
ATCTGTTGACCAAC-6	CD8+ Cytotoxic T
ACGAAGCTCCTTTA-5	CD4+/CD45RO+ Memory
CTAAACCTTCTCAT-7	CD4+/CD45RA+/CD25- Naive T
AAGACAGATCTAGG-4	CD8+/CD45RA+ Naive Cytotoxic
GCGGACTGCGGGAA-7	CD8+ Cytotoxic T
TATCGACTGCGATT-2	CD8+ Cytotoxic T
CTAACTACTCGATG-6	CD8+/CD45RA+ Naive Cytotoxic
TATACAGATGGATC-4	CD19+ B
CTAAGGTGTCGTTT-8	CD4+/CD45RA+/CD25- Naive T
ACGCCGGACTTGGA-2	CD8+ Cytotoxic T
CTAAACCTGACACT-4	CD4+/CD25 T Reg
TGAGTCGACGGAGA-6	CD8+/CD45RA+ Naive Cytotoxic
GAACAGCTTTGTCT-2	CD4+/CD45RO+ Memory
TGATTCACGCGAGA-4	CD14+ Monocyte
CACAGTGAATCGTG-2	CD4+/CD25 T Reg
ATTAAGACCGACAT-7	CD8+/CD45RA+ Naive Cytotoxic
GTAGCATGTCGATG-4	CD8+/CD45RA+ Naive Cytotoxic
TTGGTACTTTTGTC-4	CD8+/CD45RA+ Naive Cytotoxic
TATCTGACCCATAG-1	CD4+/CD25 T Reg
AGTGAAGAATCGGT-2	CD8+ Cytotoxic T
AAATCCCTCTGCAA-8	CD4+/CD45RO+ Memory
GACTACGAGATAGA-8	CD4+/CD25 T Reg
CAAGCATGTCCGAA-2	CD19+ B
ACGGAACTAGTCGT-7	CD14+ Monocyte
ATAAACACCACTAG-4	CD4+/CD45RA+/CD25- Naive T
CGATAGACATCACG-1	CD8+/CD45RA+ Naive Cytotoxic
GCCACTACCGTACA-4	CD8+/CD45RA+ Naive Cytotoxic
ATCTCAACAGCCAT-6	CD8+/CD45RA+ Naive Cytotoxic
ATGTAAACACCTCC-6	CD4+/CD25 T Reg
GGCACGTGCACTTT-7	CD4+/CD25 T Reg
TCAAGGTGGATACC-5	CD8+/CD45RA+ Naive Cytotoxic
CTCGCATGAAAAGC-2	Dendritic
ACCACGCTGTTTCT-6	CD8+ Cytotoxic T
AATAAGCTTTGAGC-1	CD14+ Monocyte
GTTAGGTGGTCCTC-2	CD56+ NK
GGGCCATGTTTCAC-6	CD4+/CD25 T Reg
ATCACACTAGCTCA-6	CD56+ NK
CATTGGGAAGCCAT-5	CD19+ B
GGTTTACTGTTACG-8	CD4+/CD25 T Reg
GAGCGGCTCCATGA-3	CD8+ Cytotoxic T
TAACACCTGTTGTG-1	CD8+/CD45RA+ Naive Cytotoxic
TTCAAGCTAAAGCA-6	CD8+ Cytotoxic T
TTTAGCTGTTCATC-8	Dendritic
GACTGAACACGCAT-7	CD4+/CD45RO+ Memory
AACATTGAAGTGCT-1	CD19+ B
ATGGTGACACTAGC-2	CD14+ Monocyte
AAACATACAAGGCG-5	CD4+/CD25 T Reg
GCCGACGATGCTTT-8	Dendritic
ATCGCCACGGTGAG-3	CD14+ Monocyte
CGCACTTGCCTACC-8	CD4+/CD25 T Reg
GTATGGTGCCAACA-7	CD19+ B
TCCAGAGACAGAGG-8	CD19+ B
GAATTAACCCACCT-1	CD8+ Cytotoxic T
GTATGGTGGATACC-8	CD8+/CD45RA+ Naive Cytotoxic
CGTCAAGAATCGGT-1	CD4+/CD25 T Reg
ATTGAATGACGGAG-5	CD4+/CD25 T Reg
CAGATCGAGGAGGT-6	CD4+/CD25 T Reg
ACAACCGAACCTCC-1	CD8+ Cytotoxic T
AGACTTCTGAGGGT-5	CD8+ Cytotoxic T
TTCCATGACGTTAG-4	CD8+/CD45RA+ Naive Cytotoxic
CTCGACACCCGTAA-7	CD4+/CD25 T Reg
GCCTCAACAACGTC-4	CD8+ Cytotoxic T
TAACATGACGATAC-5	CD8+ Cytotoxic T
GGTAAAGACAGCTA-3	CD8+ Cytotoxic T
GTAAGCACTCCGAA-2	CD8+ Cytotoxic T
CAGCTCACGTTGCA-2	CD4+/CD25 T Reg
GGACGCTGTGCTCC-4	CD56+ NK
TCGCAGCTTGGAAA-2	CD8+ Cytotoxic T
ATAAGTTGGCGTTA-3	CD56+ NK
ATTACCTGGACTAC-8	CD8+ Cytotoxic T
TAAGTCCTCCAGTA-6	CD19+ B
ATCTGACTGACACT-4	CD19+ B
CATACTTGTTCACT-5	CD8+ Cytotoxic T
TGCAATCTTAACCG-1	Dendritic
CTTTAGTGCAGAGG-2	CD56+ NK
CAACGTGAGGACAG-2	CD4+/CD45RO+ Memory
AGCAAAGAGTTGAC-3	CD8+ Cytotoxic T
AGCGTAACAATGCC-6	CD4+/CD45RO+ Memory
CATGTTACTTTGCT-1	CD14+ Monocyte
ATAGGCTGACCGAT-3	CD19+ B
GTTGACGAACTGGT-1	CD4+/CD25 T Reg
ACACGATGTCTTTG-1	CD8+/CD45RA+ Naive Cytotoxic
ACAGTCGACAGAAA-2	CD8+ Cytotoxic T
TGCTGAGACATTTC-2	CD56+ NK
TCGCACACGATGAA-3	CD4+/CD25 T Reg
AACCTACTCGGGAA-5	CD19+ B
CATCCCGACTGAGT-6	CD56+ NK
AGTCGCCTGTCTTT-5	CD4+/CD45RO+ Memory
CTACGCACCTATGG-6	Dendritic
TCAAGGTGCATGAC-4	CD4+/CD25 T Reg
GAGCGAGACCCTAC-2	CD19+ B
ATCACTACTGACTG-2	CD56+ NK
CCGAAAACGAGACG-2	CD14+ Monocyte
GGCTAAACTACTTC-2	CD4+/CD45RO+ Memory
CTCCACGATGCCAA-4	CD8+/CD45RA+ Naive Cytotoxic
AAGATTACTGTGAC-3	CD19+ B
CAAGAAGATGCACA-1	CD8+ Cytotoxic T
GTTGAGTGTCGATG-4	CD56+ NK
TTGTCATGCTGTTT-5	Dendritic
TCCCTACTGTTGCA-6	CD19+ B
CTGAAGTGGTCGAT-7	CD4+/CD45RA+/CD25- Naive T
AGACTCGACCCTAC-8	CD4+/CD45RO+ Memory
AGTGCAACTCAGTG-8	CD19+ B
TTGGGAACGAGCTT-4	CD4+/CD25 T Reg
CCGCTATGCATGAC-2	CD56+ NK
TGCCGACTGGACTT-8	CD19+ B
TGGAAGCTATCAGC-7	CD4+/CD45RO+ Memory
TGGCACCTTATTCC-5	CD8+/CD45RA+ Naive Cytotoxic
TACCGGCTTGTGAC-2	CD8+ Cytotoxic T
CACGACCTACGCTA-5	CD8+/CD45RA+ Naive Cytotoxic
TACGTTACACCCTC-3	CD4+/CD25 T Reg
GGCGACTGAACGTC-8	CD56+ NK
TACACACTCATGCA-6	CD8+ Cytotoxic T
CGACCACTCATGAC-5	CD4+/CD25 T Reg
CACGGGTGGTGTTG-4	CD4+/CD25 T Reg
GACGTATGAGCCAT-6	CD8+/CD45RA+ Naive Cytotoxic
ACTGTTACAGTAGA-3	CD4+/CD45RA+/CD25- Naive T
CAATCTACTTTCTG-1	CD4+/CD45RA+/CD25- Naive T
TCACTATGCCGTAA-5	CD56+ NK
TCAAGGACTTGGCA-2	CD8+ Cytotoxic T
CGATCCACCGTAGT-2	CD4+/CD45RO+ Memory
TGTATCTGACCACA-1	CD8+ Cytotoxic T
GAATGCTGGGATCT-3	CD56+ NK
TTGTCATGGTCACA-7	CD19+ B
CGGATAACGGTGTT-8	CD4+/CD45RO+ Memory
AGTCTTACTGAGGG-2	CD8+/CD45RA+ Naive Cytotoxic
ACAAATTGTGTCTT-2	CD19+ B
TGAGACACTGCCTC-2	CD4+/CD25 T Reg
CAACGTGAAGAATG-4	CD14+ Monocyte
AATAGGGACAGAGG-6	CD14+ Monocyte
GACATTCTACGTGT-5	CD56+ NK
GGTCAAACGGATCT-3	CD4+/CD25 T Reg
GACGAGGAGGCATT-1	CD56+ NK
ACGTTGGACTCTTA-6	CD19+ B
ATTGGGTGAGCCAT-6	CD4+/CD45RA+/CD25- Naive T
GTTAAATGATCGGT-3	CD4+/CD25 T Reg
CAGGAACTCCTTGC-8	CD56+ NK
GGAAGGTGATCAGC-1	CD19+ B
CAGTTTACCCCTAC-8	CD8+/CD45RA+ Naive Cytotoxic
TGAGGACTGTTCTT-3	CD14+ Monocyte
ATTGCACTGAACCT-4	CD4+/CD45RO+ Memory
ATTAAGACCTCGCT-1	CD19+ B
ACTGTTACTTCTAC-8	CD4+/CD45RA+/CD25- Naive T
ACGGCTCTGAGATA-6	Dendritic
CCCTGATGTGAGAA-3	CD4+/CD25 T Reg
ACTCTATGCCAATG-5	CD8+/CD45RA+ Naive Cytotoxic
GGCTAAACCTGGAT-8	Dendritic
AGCGCTCTAACCTG-3	CD19+ B
TGCAGATGTATTCC-3	CD19+ B
GATCTTTGTCACGA-3	CD19+ B
TAACACCTGGTACT-2	Dendritic
AAGAATCTTTCCGC-4	CD8+/CD45RA+ Naive Cytotoxic
AAGTTCCTGGTAGG-5	CD8+ Cytotoxic T
AGACGTACCCCTAC-4	CD34+
CCAGCTACGCGATT-7	CD4+/CD25 T Reg
TCTAACTGAGCAAA-8	CD4+/CD45RA+/CD25- Naive T
ATAGATTGCTGCTC-2	CD4+/CD25 T Reg
AGCGCCGAACGCAT-8	CD4+/CD25 T Reg
CTATAGCTGGTGGA-4	CD8+/CD45RA+ Naive Cytotoxic
TGAGACACGTGCTA-7	CD4+/CD45RO+ Memory
TGAATAACGCTGTA-5	CD8+ Cytotoxic T
ATAAGTTGGCAGAG-4	CD19+ B
GCTACGCTCTAAGC-4	CD8+/CD45RA+ Naive Cytotoxic
AAAGCAGAAAGGTA-6	CD19+ B
ACAAGAGAAAGTGA-1	CD4+/CD25 T Reg
CTTAGACTTCTACT-4	CD4+/CD45RA+/CD25- Naive T
GAGGGCCTGGAACG-3	CD4+/CD45RO+ Memory
AAATTCGAGTTGAC-4	CD8+ Cytotoxic T
AGCCACCTTATCGG-1	CD14+ Monocyte
GCCTGACTGTAGCT-6	Dendritic
GGCACGTGAGAGGC-3	CD19+ B
AGAAAGTGTCTAGG-7	CD56+ NK
AGCCTCTGGAAGGC-2	CD56+ NK
ACAGTGACAGGGTG-7	CD8+ Cytotoxic T
CTAGTTTGGTAAAG-8	CD19+ B
CAGTCAGACGAGAG-3	CD56+ NK
TAAGGCTGTTTCAC-1	CD8+ Cytotoxic T
AGTAATTGGAATCC-7	CD8+/CD45RA+ Naive Cytotoxic
AGGGTTTGAACCTG-6	CD19+ B
TATAAGACTGAAGA-1	Dendritic
GACCTCACGAGATA-5	CD4+/CD45RO+ Memory
ATGTCGGAGACACT-4	CD56+ NK
TGTAGGTGGACAGG-7	CD19+ B
TGTGATCTTTAGGC-3	CD8+ Cytotoxic T
AGTCCAGAGGTCTA-7	CD19+ B
AAGATGGACTGCAA-3	CD8+ Cytotoxic T
TAGGTTCTTCTCTA-3	CD4+/CD25 T Reg
TGACTTACCGACTA-3	CD8+ Cytotoxic T
TGTAACCTCTACGA-5	CD56+ NK
GTCTAACTATACCG-3	Dendritic
TTTCACGAGAGATA-3	Dendritic
TTGATCTGGGTGGA-1	CD14+ Monocyte
CGAAGGGACTCCCA-7	CD8+/CD45RA+ Naive Cytotoxic
GCAGTTGAGCTTCC-2	CD4+/CD25 T Reg
TCACCCGAAAACGA-2	CD4+/CD25 T Reg
CGACCACTAACAGA-2	CD8+/CD45RA+ Naive Cytotoxic
ATGTACCTCTGTTT-1	CD19+ B
GAACAGCTACCTTT-4	CD56+ NK
GTAAGCTGCACCAA-7	CD8+ Cytotoxic T
CAGTTACTCTCTCG-1	CD19+ B
CTGATGGACCGATA-2	CD56+ NK
AATACCCTTAACGC-8	CD56+ NK
TAATGCCTGTTTGG-6	CD19+ B
TACTCCCTGTCTAG-8	Dendritic
GACCTAGACCTAAG-8	CD4+/CD25 T Reg
AACCGCCTCAGTCA-6	CD8+ Cytotoxic T
TAGTTAGACGCATA-1	Dendritic
GTAGCCCTCAACCA-5	CD4+/CD25 T Reg
GGGCAAGATCGACA-4	CD56+ NK
GTAATATGCTGTCC-2	CD4+/CD45RO+ Memory
GTTAAAACGTTGGT-3	CD4+/CD25 T Reg
CAAATTGAAAAGTG-6	CD8+/CD45RA+ Naive Cytotoxic
GGGTAACTCTGTCC-2	CD4+/CD25 T Reg
ACGAAGCTAAAACG-2	CD8+ Cytotoxic T
GGTAGTACGGTCTA-6	CD14+ Monocyte
GAAGATGATGTCTT-6	Dendritic
TAGTAAACGGTATC-3	CD4+/CD45RA+/CD25- Naive T
CGGCACGAAGTCTG-5	CD8+ Cytotoxic T
TCGTGAGACTCATT-2	CD8+ Cytotoxic T
AGTAATACAGCACT-5	CD4+/CD25 T Reg
GAAACAGATCCAGA-2	CD19+ B
CTCCGAACTCCAGA-2	CD4+/CD45RO+ Memory
ATACCACTTCTACT-5	CD4+/CD25 T Reg
TGGATGTGAGATGA-4	CD4+/CD45RA+/CD25- Naive T
AAATCTGACCCTCA-1	CD8+/CD45RA+ Naive Cytotoxic
GATCGAACCCGATA-1	Dendritic
GAACGGGAGTTAGC-3	CD8+/CD45RA+ Naive Cytotoxic
GGTATCGATCTACT-1	CD56+ NK
CTTGATTGTGCGTA-2	CD4+/CD25 T Reg
CGCGGATGCAGAAA-1	CD4+/CD45RA+/CD25- Naive T
AAATCATGTTGTCT-3	CD19+ B
CAGCTCACCTACCC-1	CD4+/CD25 T Reg
CGCAAATGTGCTAG-8	Dendritic
ACGACCCTCCGCTT-4	CD8+/CD45RA+ Naive Cytotoxic
GTGACCCTTAGAAG-1	Dendritic
TTTAGCTGGCCAAT-1	CD8+ Cytotoxic T
TCTCAAACAGCTCA-4	CD8+/CD45RA+ Naive Cytotoxic
ACCGCGGACCTTCG-2	CD19+ B
TTCAAGCTTTCCCG-7	Dendritic
AATTGTGAATACCG-3	CD8+ Cytotoxic T
AATACCCTCTCTCG-1	CD4+/CD45RO+ Memory
CTAGGTGAGAGGAC-5	CD8+ Cytotoxic T
TGACTTTGTTCATC-1	CD4+/CD45RA+/CD25- Naive T
AGGTACTGGGTTCA-1	CD56+ NK
GATATATGGTCGAT-7	CD4+/CD25 T Reg
GATCGATGAAAGCA-7	CD56+ NK
GCAGTCCTAGGGTG-1	CD8+/CD45RA+ Naive Cytotoxic
ATGGTGACACCAGT-8	CD4+/CD45RA+/CD25- Naive T
TGACTTACCCTAAG-4	CD8+ Cytotoxic T
ATTACCACGGACAG-8	CD19+ B
TAGCCCACACGTTG-1	CD8+/CD45RA+ Naive Cytotoxic
TTCAGTACGGTTTG-4	CD4+/CD45RO+ Memory
GTACGTGAACAGCT-5	CD56+ NK
TTACGACTTCCGTC-8	CD19+ B
TATTGCTGGTCCTC-1	CD8+ Cytotoxic T
ATGAAGGATTTACC-8	CD4+/CD45RO+ Memory
CATGTTACTCAGTG-5	CD19+ B
CTGCGACTCTCAAG-8	CD19+ B
CCAATGGAAGTAGA-3	CD14+ Monocyte
GGGTTAACGCATAC-7	Dendritic
ATAAGTACTTGGCA-8	CD8+ Cytotoxic T
ATTGCGGAGTTCTT-1	CD4+/CD25 T Reg
TACGGAACGTACGT-4	CD8+/CD45RA+ Naive Cytotoxic
ATCTTTCTAAGTGA-2	CD19+ B
CATAAAACAACTGC-8	CD34+
GTGTAGTGCGCCTT-8	CD4+/CD45RA+/CD25- Naive T
GCCTACACAGCTCA-8	CD4+/CD25 T Reg
TGACCAGATGTCGA-2	CD8+ Cytotoxic T
GACGAGGATTCACT-5	CD4+/CD45RO+ Memory
CTGAATCTCAACCA-4	CD56+ NK
AATTGTGATAGAAG-7	CD4+/CD25 T Reg
TACTACACTTGAGC-7	CD8+/CD45RA+ Naive Cytotoxic
TCATCATGCGCATA-4	CD56+ NK
TTACCATGTTTGGG-7	CD19+ B
AATAAGCTTGTCAG-4	CD8+ Cytotoxic T
CCGCGAGAGCAAGG-7	CD8+/CD45RA+ Naive Cytotoxic
GTACGTGAACCGAT-8	CD14+ Monocyte
TGATTCTGCTATGG-2	CD8+/CD45RA+ Naive Cytotoxic
ATTTCGTGAGGCGA-8	CD8+/CD45RA+ Naive Cytotoxic
CTGAAGACCTCAGA-7	CD56+ NK
CAACTTTGTCAAGC-7	CD8+/CD45RA+ Naive Cytotoxic
GATTCGGACGATAC-5	CD8+/CD45RA+ Naive Cytotoxic
CGTGTAGACCAAGT-7	CD8+ Cytotoxic T
CTGTGAGATCAGGT-6	CD56+ NK
AGATATACTCTATC-4	CD4+/CD25 T Reg
GTATTCACCTCAGA-3	CD14+ Monocyte
ATAGTTGAGGCAAG-4	CD56+ NK
CAAGCATGACACCA-6	CD19+ B
AGAGAATGTCAGTG-4	CD56+ NK
AGAAAGTGCCACCT-8	CD56+ NK
CGCGAGACCATGGT-7	CD4+/CD45RO+ Memory
ACCCGTTGAAAGTG-4	CD19+ B
AAACGCTGTCGATG-7	CD8+ Cytotoxic T
TACGCGCTGTACCA-4	CD8+/CD45RA+ Naive Cytotoxic
TAGAATTGCTGAAC-4	CD19+ B
TGATTAGATACAGC-3	CD56+ NK
GATCATCTTGCACA-2	Dendritic
AGTGACACGGGAGT-1	CD19+ B
AGACGTACAATCGC-1	CD4+/CD45RA+/CD25- Naive T
TAGGCAACCCTGTC-8	CD4+/CD25 T Reg
CCGAAAACGTGTAC-2	CD8+ Cytotoxic T
GACCTCACATCACG-4	CD19+ B
CCCATCGATGCTCC-7	CD19+ B
AGACCTGATGCTCC-5	CD4+/CD45RO+ Memory
TCGTAGGAAAGCCT-4	CD56+ NK
TTACACACTGCCAA-7	CD4+/CD25 T Reg
GCAGTCCTGCTGAT-4	CD8+/CD45RA+ Naive Cytotoxic
TCACTATGAGCATC-3	CD8+/CD45RA+ Naive Cytotoxic
GGGAACGAACTACG-1	Dendritic
CTACCTCTAGTACC-3	CD4+/CD25 T Reg
TGGTCAGAAGCATC-8	CD4+/CD45RO+ Memory
TCAGACGATGGAGG-1	CD4+/CD45RO+ Memory
GCTCAGCTCGATAC-4	CD19+ B
TTGATCTGTTACTC-6	CD4+/CD25 T Reg
TCTCTAGAATGCCA-5	CD4+/CD25 T Reg
AAGAACGAAGAAGT-1	CD8+/CD45RA+ Naive Cytotoxic
CGGCACGAGAAGGC-5	CD19+ B
GATAATACACCACA-5	CD8+/CD45RA+ Naive Cytotoxic
CGCCATTGCCGCTT-1	CD56+ NK
GCACGTCTTCCTCG-3	CD19+ B
AGCCGGTGCTGACA-1	CD8+/CD45RA+ Naive Cytotoxic
TGAATAACAAACGA-5	CD8+/CD45RA+ Naive Cytotoxic
AGAAGATGTTCTTG-3	CD56+ NK
GGAACACTTCTATC-6	CD56+ NK
ACGTCAGAAAGCCT-3	CD8+ Cytotoxic T
AAATCCCTCCTTGC-5	Dendritic
GAGGGAACATGACC-3	CD34+
ACTTCAACGCGTAT-1	CD4+/CD25 T Reg
GTAACGTGCGACAT-2	CD8+/CD45RA+ Naive Cytotoxic
TTAACCACCTAGCA-4	CD56+ NK
CTAGGTGAATACCG-2	CD4+/CD45RO+ Memory
CTCAGAGAGTAAAG-8	CD19+ B
GCACTGCTGCAGTT-4	CD8+ Cytotoxic T
TTACACACGCTCCT-5	CD8+/CD45RA+ Naive Cytotoxic
TTCATGACTGTGAC-4	CD14+ Monocyte
ATCACGGAGAATCC-6	CD8+/CD45RA+ Naive Cytotoxic
CGTGATGAACGCTA-2	CD4+/CD25 T Reg
TGGTCAGAACTGGT-4	CD19+ B
AACGGTTGGCGAAG-6	CD34+
GCACCACTTTTGGG-2	CD56+ NK
ATTCGACTGCTAAC-6	CD8+/CD45RA+ Naive Cytotoxic
GCCTCAACAATCGC-1	CD8+ Cytotoxic T
GAAGCTTGTCTGGA-1	CD8+/CD45RA+ Naive Cytotoxic
CTGTGAGATGGCAT-7	CD8+/CD45RA+ Naive Cytotoxic
GCCAAATGCACTCC-3	CD4+/CD25 T Reg
CGCTAAGATATGCG-6	CD4+/CD45RO+ Memory
AGTTCTACCGCATA-2	CD19+ B
ACCAACGAGCTATG-1	CD19+ B
ATACCACTTCAGAC-3	CD4+/CD25 T Reg
ACGTCCTGCCCTAC-5	CD4+/CD25 T Reg
AGATCTCTTCTATC-5	CD4+/CD25 T Reg
GGTTTACTCCAGTA-8	CD4+/CD45RO+ Memory
ACGTTGGAACCTGA-6	CD4+/CD45RA+/CD25- Naive T
GGGATGGAGGTGAG-7	CD19+ B
TACGAGACCAGAAA-5	CD4+ T Helper2
TAGGACTGAGTAGA-5	CD8+ Cytotoxic T
AATTACGAACCACA-4	CD14+ Monocyte
GCCTACACTTGCTT-2	CD56+ NK
TTACACACGAAGGC-2	CD56+ NK
CTTCATGACGTCTC-1	CD4+/CD45RA+/CD25- Naive T
CTTGAGGACACACA-1	CD8+ Cytotoxic T
TATAAGTGTGCCAA-2	CD8+ Cytotoxic T
GGAGGTGATACTCT-3	Dendritic
CAACGAACCTTATC-5	CD4+/CD25 T Reg
AGAAACGAAGGTCT-7	CD4+/CD25 T Reg
CAACTTTGAGATCC-2	CD14+ Monocyte
GCCCAGGATTGGTG-6	CD8+ Cytotoxic T
ACTTGACTGAGCAG-1	CD4+/CD25 T Reg
TGGCAATGTGTCCC-3	CD8+/CD45RA+ Naive Cytotoxic
CGACCTTGAAAGTG-6	CD14+ Monocyte
AACCTTTGCAGAGG-5	CD8+/CD45RA+ Naive Cytotoxic
TGATTCACCCTACC-7	CD8+ Cytotoxic T
GTGTCAGAAGGTTC-6	CD14+ Monocyte
GGCGACACTCTACT-1	CD56+ NK
TTGGTACTTGACCA-3	CD56+ NK
ACATACCTAAGTAG-2	CD4+/CD45RA+/CD25- Naive T
CGATCCACCTACCC-4	CD8+ Cytotoxic T
AGTCAGACCCATGA-7	CD56+ NK
TGTATGCTGCCAAT-7	CD8+ Cytotoxic T
AGTGAAGAGTTCTT-1	CD8+ Cytotoxic T
CGTACAGACGTTAG-2	CD8+ Cytotoxic T
AGGTACACGCAGTT-2	CD4+/CD25 T Reg
ATGAGCACCACTGA-4	CD4+/CD45RO+ Memory
ATGCGATGCTCTAT-5	CD8+/CD45RA+ Naive Cytotoxic
CAAGTCGAGGACGA-6	CD19+ B
TCTCCACTGTGAGG-5	CD8+ Cytotoxic T
GAACTGTGAAGCCT-1	CD14+ Monocyte
TGCGAAACGCAGAG-5	CD4+/CD45RO+ Memory
GACACTGACGTTGA-1	CD4+/CD45RO+ Memory
GGATTTCTGACAGG-1	CD8+/CD45RA+ Naive Cytotoxic
ATTCAGCTCAGATC-1	CD4+/CD25 T Reg
TTCTTACTGGTGAG-2	CD8+/CD45RA+ Naive Cytotoxic
TACGCCACCCGCTT-1	CD8+/CD45RA+ Naive Cytotoxic
GTAGCAACACACGT-2	CD8+/CD45RA+ Naive Cytotoxic
GTGTACGATGATGC-5	CD14+ Monocyte
AATAACACACGGGA-4	CD4+/CD45RA+/CD25- Naive T
TGCGATGATTCGGA-8	CD4+/CD45RA+/CD25- Naive T
GCTTGAGATACTCT-4	CD4+/CD25 T Reg
TCCGAGCTGAGAGC-8	CD8+/CD45RA+ Naive Cytotoxic
TGACGAACGAGGAC-5	CD8+/CD45RA+ Naive Cytotoxic
GGACCTCTAGAGTA-2	CD19+ B
CGCTACTGAACCTG-3	CD14+ Monocyte
ATTCCAACGACGAG-3	CD56+ NK
CTAACGGACGTTAG-8	CD4+/CD45RO+ Memory
TTCAAAGAATTCGG-1	CD8+/CD45RA+ Naive Cytotoxic
TCATCAACAGTAGA-4	CD4+/CD45RO+ Memory
CTAACGGACAGCTA-4	CD4+/CD45RA+/CD25- Naive T
CAGAGGGATGGTGT-2	CD8+ Cytotoxic T
CAGTCAGAAGAGAT-8	CD14+ Monocyte
ACCTCGTGACGTTG-6	CD4+/CD25 T Reg
CTTTGATGTGATGC-2	CD56+ NK
GACAACTGGGAAAT-5	CD8+ Cytotoxic T
GGAACTTGTCCGTC-6	CD4+/CD25 T Reg
GAGGGTGACTTTAC-7	CD8+/CD45RA+ Naive Cytotoxic
GTTACTACAGTGCT-1	CD4+/CD25 T Reg
TCACGAGAGGGCAA-6	Dendritic
ACTCGAGATGAAGA-6	CD8+ Cytotoxic T
GTGTATCTAACGAA-1	CD4+/CD25 T Reg
ATCCAGGATAGAAG-3	CD8+/CD45RA+ Naive Cytotoxic
TTATGAGACGGAGA-1	CD4+/CD45RO+ Memory
CTCATTGATATTCC-5	CD19+ B
ACTCGCACCACTAG-4	CD19+ B
ATGAAACTTGGGAG-4	CD19+ B
AAGTGGCTGAGACG-7	CD56+ NK
CAGCCTTGTAGCCA-6	CD8+ Cytotoxic T
GAGCTCCTATCAGC-5	CD8+/CD45RA+ Naive Cytotoxic
ACCCGTTGTACTCT-5	CD8+ Cytotoxic T
AGAGATGAACCCTC-4	CD34+
CCCTGATGATGCTG-7	CD56+ NK
TGCAAGTGCTATTC-3	CD19+ B
AAAGAGACGACGAG-1	CD19+ B
AGTAGGCTCACACA-4	Dendritic
CAAGCATGATCAGC-1	CD4+/CD45RO+ Memory
CCTGAGCTCTATTC-7	CD19+ B
ACGGCGTGTGGGAG-3	CD4+/CD45RA+/CD25- Naive T
GCCGGAACGGATCT-4	Dendritic
GGACAGGATGGCAT-1	CD56+ NK
CGATCAGAGTATGC-7	CD4+/CD25 T Reg
ATCTACTGAGGTCT-1	CD8+ Cytotoxic T
CTATAAGAAGTTCG-1	CD56+ NK
TAGCCCACTTCCCG-4	Dendritic
TCGTGAGAAAGTGA-4	CD4+/CD45RO+ Memory
CATTGGGAGGAAAT-7	CD8+/CD45RA+ Naive Cytotoxic
ACAAGAGACATGCA-4	CD56+ NK
GATCGAACGTCTAG-3	CD8+ Cytotoxic T
GACGTAACTCCCGT-8	CD4+/CD45RA+/CD25- Naive T
TATAAGTGCCGTTC-4	CD8+/CD45RA+ Naive Cytotoxic
AGTCACGATCCAGA-3	CD8+/CD45RA+ Naive Cytotoxic
GGATGTTGTCCTTA-8	CD8+/CD45RA+ Naive Cytotoxic
TCCTACCTTGTGCA-5	CD14+ Monocyte
AAATCTGATGTTCT-4	CD4+/CD25 T Reg
AACCCAGACGAGTT-8	CD4+/CD25 T Reg
GATAGCACAGACTC-7	CD4+/CD45RA+/CD25- Naive T
TCTATGTGCCTCGT-2	CD19+ B
TGTAACCTGACGGA-2	CD4+/CD25 T Reg
TACTACACGAGGCA-3	CD8+ Cytotoxic T
TGGTACGATCAAGC-1	CD56+ NK
ATATGAACGAGGCA-5	CD8+/CD45RA+ Naive Cytotoxic
CACTGAGAGTTTGG-2	CD4+/CD25 T Reg
CATCTTGAGAGCTT-8	CD8+/CD45RA+ Naive Cytotoxic
GTTCATACATGCCA-4	CD8+ Cytotoxic T
AGATATTGACCACA-1	CD4+/CD45RO+ Memory
GGGTTAACAGCCAT-3	CD4+/CD25 T Reg
CAAGGACTTTATCC-1	CD14+ Monocyte
CACGAAACTAGACC-7	CD8+/CD45RA+ Naive Cytotoxic
GCCAACCTTCGACA-2	CD8+/CD45RA+ Naive Cytotoxic
CTGGATGAACTGGT-4	CD19+ B
TCTAACTGTCTTCA-5	CD4+/CD45RO+ Memory
GAGCAGGAATTCTC-3	CD8+ Cytotoxic T
GAGTACACTATCTC-5	CD56+ NK
TTTGCATGACGTAC-4	CD8+/CD45RA+ Naive Cytotoxic
ACAGTGACTCCAAG-5	CD8+/CD45RA+ Naive Cytotoxic
GATATTGACTTATC-6	CD8+ Cytotoxic T
ACCAGCCTGGTAAA-4	CD8+ Cytotoxic T
CAAGCATGGTTCTT-1	CD8+ Cytotoxic T
TGATTCTGAACAGA-5	CD4+/CD45RA+/CD25- Naive T
GGCCACGAAGAAGT-3	CD8+/CD45RA+ Naive Cytotoxic
CCAGCACTTGTTCT-8	CD8+/CD45RA+ Naive Cytotoxic
AGGTGTTGACAGCT-6	CD4+/CD25 T Reg
CACTAACTTGTCCC-3	CD4+/CD25 T Reg
TGACTGGACTGGTA-8	CD8+/CD45RA+ Naive Cytotoxic
TGCGTAGATAGACC-5	CD4+/CD45RO+ Memory
TGTAGGTGTATTCC-7	CD4+/CD25 T Reg
TTGAGGACAGGTCT-4	CD8+ Cytotoxic T
GACGAGGAACTGTG-2	CD14+ Monocyte
CGCTAAGAGTGCTA-3	CD4+/CD25 T Reg
GCTCCATGGGAACG-1	CD8+ Cytotoxic T
GTTATGCTCACCAA-5	CD19+ B
GGTACTGACGAACT-7	CD19+ B
GTGTATCTGAGGGT-7	CD4+/CD25 T Reg
TTCCAAACGGTCTA-2	CD56+ NK
CCGCTATGGTACGT-1	CD19+ B
TGGAGGGAACCACA-2	CD56+ NK
GGCTAAACTTGCGA-7	CD8+/CD45RA+ Naive Cytotoxic
GATCGAACGTAGGG-6	CD4+/CD45RO+ Memory
AAGCGTACCGACAT-5	CD19+ B
AGACTGACGTTAGC-6	CD14+ Monocyte
GATTCGGATATCTC-8	CD4+/CD45RO+ Memory
AGGATGCTGAATCC-4	CD8+/CD45RA+ Naive Cytotoxic
GCACCTACCTCTAT-5	CD4+ T Helper2
AGATATACTATCGG-1	CD8+/CD45RA+ Naive Cytotoxic
GACAGTACATCAGC-6	Dendritic
TCTAACTGAGACTC-1	CD8+ Cytotoxic T
GCAGGCACGTAAAG-3	CD4+/CD25 T Reg
GTATTCACCTCCAC-1	CD4+/CD45RO+ Memory
AACCGCCTCTCGAA-7	CD19+ B
AAATCCCTGATGAA-5	CD19+ B
GCACCTACCCTATT-3	Dendritic
ACAATAACCGATAC-1	CD19+ B
TCAATCACCGATAC-4	CD4+/CD25 T Reg
GTAGACTGGGTTTG-7	CD4+/CD45RA+/CD25- Naive T
GACGTCCTTGTCGA-1	CD8+/CD45RA+ Naive Cytotoxic
TATGGTCTTCGTGA-1	CD4+/CD25 T Reg
CACTCTCTTGGAAA-6	CD8+ Cytotoxic T
GTAGCCCTGCCATA-3	CD8+/CD45RA+ Naive Cytotoxic
AACCTTTGGCAGAG-1	CD56+ NK
CCATGCTGTCACCC-8	CD8+ Cytotoxic T
GTTAGGTGACTTTC-6	CD14+ Monocyte
GCTAGAACTTAGGC-8	CD4+/CD45RA+/CD25- Naive T
CGTCCATGCTTGGA-4	CD8+ Cytotoxic T
AGGGAGTGGGTGAG-3	CD8+ Cytotoxic T
TAAGTAACAACTGC-3	CD19+ B
GCCGACGACTGAGT-1	CD4+/CD25 T Reg
CGAGAACTCCCTTG-7	Dendritic
GTAGCTGACTGTAG-2	Dendritic
TGGCAATGCCTCGT-3	CD8+/CD45RA+ Naive Cytotoxic
GACGAGGATTCTCA-8	CD14+ Monocyte
AACGGTTGGGCATT-6	CD19+ B
ACCACCTGCTATGG-4	CD8+/CD45RA+ Naive Cytotoxic
ATGCAGTGGACAGG-3	CD8+/CD45RA+ Naive Cytotoxic
CGATAGACAAAGCA-2	Dendritic
CAATCGGAGAATGA-7	CD4+/CD25 T Reg
TACTACTGTAAGCC-8	CD4+/CD45RO+ Memory
TAACAATGCCTATT-4	CD4+/CD25 T Reg
GCAGATACAGTTCG-8	CD4+/CD25 T Reg
CAGTGATGGATAGA-5	CD4+/CD45RO+ Memory
TAAGATACTGACCA-4	CD4+/CD45RO+ Memory
TCCAGAGATCTGGA-8	CD4+/CD45RO+ Memory
ATACCGGAATCTTC-2	Dendritic
CCCTCAGATGAAGA-8	CD14+ Monocyte
ACTTTGTGTCTCGC-4	CD4+/CD25 T Reg
TACGATCTTGGATC-4	CD19+ B
AGAGAAACCTTATC-2	CD8+ Cytotoxic T
AAGTGCACCACAAC-3	CD8+/CD45RA+ Naive Cytotoxic
GTGCTAGAAAGTGA-1	CD56+ NK
GAGCAACTCAACTG-1	CD8+/CD45RA+ Naive Cytotoxic
CGTTTAACGACGTT-1	CD8+ Cytotoxic T
CTGGATGACATTGG-7	CD8+/CD45RA+ Naive Cytotoxic
GACGATTGTCACGA-8	CD19+ B
ATACGGACTCTCGC-8	CD19+ B
TACTTTCTTTCTAC-8	CD14+ Monocyte
ATTGAATGAGTAGA-2	CD4+/CD45RA+/CD25- Naive T
ACCGTGCTCATGCA-4	CD56+ NK
GTTAAAACTATGGC-2	CD8+/CD45RA+ Naive Cytotoxic
TTCAGACTCTTGAG-5	CD14+ Monocyte
TAGTACCTGCTAAC-4	CD4+/CD45RA+/CD25- Naive T
TCCCATCTAACCAC-6	CD19+ B
CTAGATCTAAGAGT-4	CD56+ NK
AGCTTTACGGGATG-2	CD56+ NK
TAAACAACACTACG-2	CD19+ B
AGCATTCTTTCCAT-4	CD8+/CD45RA+ Naive Cytotoxic
CGCTACACAGAATG-6	CD8+/CD45RA+ Naive Cytotoxic
CCCAAAGAAGTCTG-3	CD19+ B
ACGGGAGAGACACT-5	CD4+/CD25 T Reg
CATCGCTGTCTTAC-8	CD8+/CD45RA+ Naive Cytotoxic
TTTGACTGCTTCGC-1	CD14+ Monocyte
GCGATATGCCCACT-7	CD19+ B
TTGCATTGACACGT-3	CD19+ B
AGACGTACCTCGCT-2	CD19+ B
TTTCACGATGTTCT-5	CD8+/CD45RA+ Naive Cytotoxic
AGATTCCTCGAGTT-3	CD8+ Cytotoxic T
GTTAGGTGTAACCG-7	CD4+/CD45RO+ Memory
AGAGAAACCGGAGA-2	CD4+/CD45RO+ Memory
AAAGTTTGGTAAGA-1	CD4+/CD45RA+/CD25- Naive T
CTAAGGACTCAAGC-5	CD56+ NK
CGCCATTGCACTAG-1	CD4+/CD25 T Reg
GAAGGGTGCTCCCA-3	CD4+/CD25 T Reg
ATAGTTGACGTACA-2	CD8+/CD45RA+ Naive Cytotoxic
GACGTATGTGCCTC-2	CD14+ Monocyte
ATAATCGAGAACCT-8	CD56+ NK
ACTAAAACCTGCTC-2	CD4+/CD45RA+/CD25- Naive T
ATCAACCTAGTTCG-5	CD4+/CD25 T Reg
TAGTGGTGTTCCAT-4	CD56+ NK
GGAAGGACCTCTTA-3	CD14+ Monocyte
CTAACGGATCCTCG-8	CD8+/CD45RA+ Naive Cytotoxic
TTAGGTCTGTCACA-1	CD8+ Cytotoxic T
ATGTACCTTTCAGG-3	CD56+ NK
CATCTCCTGGCAAG-7	CD4+/CD25 T Reg
CCATGCTGGCTAAC-3	CD8+/CD45RA+ Naive Cytotoxic
CGACTCACTGAAGA-6	CD4+/CD45RO+ Memory
TGCACAGAAAGATG-3	CD8+ Cytotoxic T
ATGCAGACTTGGTG-6	CD8+ Cytotoxic T
GGACCTCTGGTTAC-1	CD19+ B
AGCGGGCTACCTTT-8	CD8+/CD45RA+ Naive Cytotoxic
GGCCAGACAACCTG-1	CD8+ Cytotoxic T
CGGTAAACACTCTT-5	CD8+/CD45RA+ Naive Cytotoxic
TTCGAGGAGCCCTT-6	CD4+/CD25 T Reg
CACTATACTAAGCC-8	CD56+ NK
AGTATAACTGAGAA-6	CD19+ B
CGAGGCACCAGAGG-7	CD56+ NK
ATCGTTTGGTCCTC-7	CD8+/CD45RA+ Naive Cytotoxic
TAGGCAACTGAGCT-3	CD14+ Monocyte
AACTCGGATGAACC-7	CD14+ Monocyte
ACCAGTGAAGATCC-1	CD8+ Cytotoxic T
GCCGACGAGAAAGT-4	CD4+/CD25 T Reg
CACCACTGATCGAC-1	CD4+/CD45RA+/CD25- Naive T
TTGAGGTGGAGAGC-8	Dendritic
GGGATTACGTTGGT-4	CD19+ B
CCTAAGGAAAGTGA-3	CD14+ Monocyte
TCCTATGAAGTCGT-7	CD4+/CD25 T Reg
GGAGCCACCCCTCA-5	CD19+ B
TAATCCACTTGCTT-6	CD8+ Cytotoxic T
GGAATGCTGAGATA-3	CD8+ Cytotoxic T
ATGTCGGACGTGAT-7	CD8+/CD45RA+ Naive Cytotoxic
CGCCATACATCAGC-4	CD4+/CD45RO+ Memory
CTATAGCTTTGCAG-1	CD56+ NK
AGGCTAACCACCAA-5	CD4+/CD45RO+ Memory
TACGACGACCTCAC-8	CD14+ Monocyte
GTTTAAGACCTCAC-5	CD19+ B
TTATTCCTGGGACA-2	CD56+ NK
GCCCAGGACTCGCT-2	CD56+ NK
GCTAGAACCAGAGG-8	CD19+ B
ATGTTGCTAACGTC-1	CD4+/CD25 T Reg
GGCCCAGAAGCGGA-6	CD8+/CD45RA+ Naive Cytotoxic
CGAAGTACTCCAGA-8	Dendritic
AATGCGTGACGGTT-6	Dendritic
ATTCAGCTTCGTTT-1	CD4+/CD25 T Reg
ATATGAACAAAAGC-3	CD56+ NK
CAATCGGAAAAACG-4	CD56+ NK
CGTGATGATCTCGC-7	CD8+/CD45RA+ Naive Cytotoxic
GACGTATGAGCACT-2	CD8+ Cytotoxic T
TATGGTCTTGATGC-3	CD19+ B
ACCATTACCAACTG-8	CD19+ B
GCATGTGACCTAAG-8	Dendritic
GGCATATGTTGTCT-3	CD8+ Cytotoxic T
GTTTAAGAGTGCTA-3	CD4+/CD25 T Reg
GTTATGCTCTGACA-5	CD8+/CD45RA+ Naive Cytotoxic
GAGATGCTGATACC-1	CD8+/CD45RA+ Naive Cytotoxic
GCAGCCGAGACACT-4	CD14+ Monocyte
TCCAGAGATTCTTG-3	CD8+ Cytotoxic T
GCACCTACTACTTC-6	CD8+/CD45RA+ Naive Cytotoxic
CAACGAACCGCAAT-1	CD19+ B
GGATGTACGAGAGC-1	CD8+ Cytotoxic T
AGATCGTGTTTACC-6	CD56+ NK
TTAGCTACCCCAAA-7	CD19+ B
TACGCCACTCGCAA-6	CD4+/CD45RO+ Memory
ACATGGTGGCGATT-4	CD8+ Cytotoxic T
GGAAGGTGAGAACA-7	CD56+ NK
CTACTCCTCCAAGT-4	CD14+ Monocyte
TTTCCAGACATGCA-8	CD4+/CD25 T Reg
GGTACTGATTCCCG-1	CD56+ NK
ACTGTTACCAGTCA-2	CD56+ NK
ATGCGCCTTTGTGG-3	CD4+/CD25 T Reg
TCGAGCCTATCGGT-8	CD19+ B
GCTCGACTTCAGTG-6	Dendritic
TTTGCATGTAACGC-3	CD4+/CD25 T Reg
GCGATATGACTCAG-6	CD14+ Monocyte
ATTAGATGGGGAGT-1	Dendritic
TTAGGTCTCTCTTA-5	CD4+/CD45RO+ Memory
ATCTCAACCGACAT-4	CD8+ Cytotoxic T
AACTCTTGTGAACC-4	CD8+ Cytotoxic T
CTAGGTGATTCCAT-2	CD56+ NK
TGCCAAGAAAGATG-2	CD19+ B
TACACACTTTCTTG-2	CD8+/CD45RA+ Naive Cytotoxic
GCGAGCACCGAGAG-7	CD14+ Monocyte
TTGAATGAATCGGT-7	CD8+/CD45RA+ Naive Cytotoxic
CCAGTGCTTCCTGC-5	CD56+ NK
GAACGTTGCCTCAC-6	CD4+/CD25 T Reg
GAATTAACTTGTGG-3	CD8+/CD45RA+ Naive Cytotoxic
TGATAAACTCCTTA-6	CD4+/CD25 T Reg
TCTTGATGACCTTT-4	CD8+ Cytotoxic T
GAAGTGCTCACAAC-8	CD8+/CD45RA+ Naive Cytotoxic
CATTGGGATCTCTA-4	CD56+ NK
TTCTCAGAAACCAC-4	CD4+/CD25 T Reg
GATTCTACAGATGA-2	CD4+/CD25 T Reg
TGACTTTGTGAAGA-3	CD8+ Cytotoxic T
ACCATTACACCCTC-5	Dendritic
CTAGGATGAGGTTC-2	CD8+ Cytotoxic T
CATTGACTGAATCC-2	CD4+/CD45RO+ Memory
AGAGAAACAGGTTC-1	CD4+/CD45RO+ Memory
AGTTAAACCCGTAA-4	CD14+ Monocyte
CATAAATGGCGGAA-6	CD8+/CD45RA+ Naive Cytotoxic
AACCCAGATTACTC-8	CD4+/CD25 T Reg
GGTTTACTCCAAGT-2	Dendritic
CACTGAGAGGACGA-5	CD19+ B
TTAGGTCTTGTCAG-1	CD8+ Cytotoxic T
GACGTAACCTTGGA-4	CD14+ Monocyte
GTATTAGAGTCTAG-6	CD19+ B
GGCTAATGCTACGA-5	CD56+ NK
GAATGGCTTCGTGA-2	CD56+ NK
AATAACACTCTACT-8	CD4+/CD45RA+/CD25- Naive T
TGAGCAACCCTCGT-1	CD4+/CD45RO+ Memory
TAGTCACTAGCAAA-1	CD8+/CD45RA+ Naive Cytotoxic
CCGATAGAGGTCTA-3	CD4+/CD25 T Reg
CATAAATGACCTCC-8	CD8+ Cytotoxic T
GAAGGGTGACGGTT-7	CD8+/CD45RA+ Naive Cytotoxic
CAGATGACTCTATC-8	CD8+ Cytotoxic T
GTATCACTGTGAGG-1	CD8+/CD45RA+ Naive Cytotoxic
TTACGTACACAGCT-2	CD4+/CD25 T Reg
TACGAGTGAAGAGT-5	CD8+ Cytotoxic T
CCGCTATGTAACGC-6	CD4+/CD25 T Reg
TACTACACGACACT-2	CD8+/CD45RA+ Naive Cytotoxic
GTATTCACCGAGAG-8	CD4+/CD45RA+/CD25- Naive T
CAGGTTGACTGTAG-5	CD19+ B
AAGTAGGACATGAC-7	CD56+ NK
CAACTTTGGAAAGT-1	CD8+/CD45RA+ Naive Cytotoxic
TGGACTGACTCAAG-5	CD14+ Monocyte
GGCATATGGTACAC-8	CD4+/CD45RA+/CD25- Naive T
AAGCCAACAGACTC-6	CD4+/CD25 T Reg
CAGCGGACCCTCGT-5	CD8+/CD45RA+ Naive Cytotoxic
ACAAATTGTTTCTG-8	CD56+ NK
GAACGTTGAAAGTG-5	CD8+/CD45RA+ Naive Cytotoxic
GGCCACGAGTCGAT-5	CD8+ Cytotoxic T
GACAACACGTCTGA-5	Dendritic
ACCTGGCTGAAGGC-8	CD8+/CD45RA+ Naive Cytotoxic
GCTACCTGACTCTT-6	CD4+/CD25 T Reg
CAATATGAACGTTG-3	CD19+ B
CGGTAAACAGCCAT-6	CD56+ NK
AGTTAAACGGAGGT-4	CD56+ NK
GGGCAAGAGAGAGC-8	CD19+ B
CAAGGACTTAAGCC-3	CD8+/CD45RA+ Naive Cytotoxic
CCAGTGCTTTCTCA-2	CD8+/CD45RA+ Naive Cytotoxic
ATACAATGCGACTA-6	CD19+ B
TAAATCGAACTACG-5	CD19+ B
GACGATTGCTTGGA-3	CD4+/CD25 T Reg
GAACGGGAGGAAGC-2	CD4+/CD25 T Reg
ACCGAAACTAGACC-2	CD8+ Cytotoxic T
ACACCAGAAGTACC-5	CD4+/CD25 T Reg
AACTCGGATATCGG-7	CD8+/CD45RA+ Naive Cytotoxic
ATACAATGCCTAAG-3	CD4+/CD45RA+/CD25- Naive T
GACATTCTAATGCC-1	CD4+/CD45RO+ Memory
TCACCTCTGAGCTT-2	CD4+/CD25 T Reg
TAAATCGACCGATA-2	CD19+ B
CCTAAGGAGCCTTC-6	Dendritic
AGCGGGCTCGACTA-1	CD4+/CD25 T Reg
ACTTCCCTTCCGTC-6	CD4+/CD45RA+/CD25- Naive T
TCCATCCTTAGAGA-2	CD14+ Monocyte
CTAAGGACATGGTC-1	CD8+ Cytotoxic T
GGTACATGCCGTTC-3	CD14+ Monocyte
GTAGTGACTTCTAC-5	CD56+ NK
GAGCTCCTTCCTGC-8	CD8+ Cytotoxic T
AATCGGTGGGTATC-7	CD4+/CD25 T Reg
GGGTTAACCGTGAT-1	CD8+ Cytotoxic T
AAAGCAGACCCTAC-5	CD4+/CD25 T Reg
ATACTCTGGACAAA-8	CD4+/CD45RA+/CD25- Naive T
ATACGTCTCAGTCA-8	CD14+ Monocyte
AAATGGGAAGATGA-8	CD19+ B
AAGGTGCTCCTCCA-2	Dendritic
TCCCTACTTAGTCG-5	CD19+ B
ATTGATGAAAGGTA-1	CD56+ NK
GGTACATGTGTCTT-4	CD4+/CD25 T Reg
TGCAAGACAGTGCT-1	CD56+ NK
TGATTCTGGGAACG-7	CD8+ Cytotoxic T
TTCATTCTCACTGA-4	CD4+/CD45RA+/CD25- Naive T
TAGTCACTACCTCC-4	CD8+ Cytotoxic T
CCTCGAACACCATG-5	CD56+ NK
GATCGATGTGCAAC-3	CD8+ Cytotoxic T
AAGTAACTGGTATC-7	CD4+/CD25 T Reg
GATCGTGACCAATG-5	CD8+ Cytotoxic T
AACATTGATGCTCC-8	CD4+/CD45RA+/CD25- Naive T
GAAGCGGAAGTTCG-4	CD4+/CD25 T Reg
AAGTATACGTGAGG-4	CD56+ NK
GCGCATCTACGACT-6	CD19+ B
GCCTCATGACTAGC-1	CD8+/CD45RA+ Naive Cytotoxic
CACTAACTAAACAG-7	CD4+/CD45RO+ Memory
ATCAACCTCCGATA-7	CD56+ NK
ACGGCTCTATTCTC-4	CD56+ NK
GGAACTTGACGCAT-3	CD56+ NK
CCAGAAACTTCCGC-6	CD14+ Monocyte
CTCGACACGGTGGA-5	CD19+ B
CAGACTGATCTCGC-8	CD19+ B
CAGTTGGACACTCC-8	CD14+ Monocyte
CATCAGGAAACGTC-1	CD8+/CD45RA+ Naive Cytotoxic
CGACTCACTCTTCA-4	CD8+ Cytotoxic T
AATCTCTGTACTTC-4	CD56+ NK
CAGTTTACTGGTCA-1	CD19+ B
AATAAGCTCCTACC-5	CD8+ Cytotoxic T
[truncated: 38,830 more rows]

## Sheet: Zero-shot Learning
Table S2 GTEx and TCGA Data used for Zero-shot Learning
Sample ID	Tissue/Cancer Type	Dataset Spliting	Normal/Tumor
GTEX.1122O.1226.SM.5H113.1	Breast	Training Set	Normal
GTEX.Y8E4.1626.SM.5S2MW.1	Breast	Training Set	Normal
GTEX.ZTX8.1226.SM.4YCE9.1	Breast	Training Set	Normal
GTEX.ZYFC.0826.SM.5E44K.1	Breast	Training Set	Normal
GTEX.1399U.1826.SM.5PNZ1.1	Breast	Training Set	Normal
GTEX.13CF2.2026.SM.5K7VI.1	Breast	Training Set	Normal
GTEX.13N11.1726.SM.5J1OJ.1	Breast	Training Set	Normal
GTEX.12ZZX.1126.SM.5EGKB.1	Breast	Training Set	Normal
GTEX.12WSM.1726.SM.5BC6J.1	Breast	Training Set	Normal
GTEX.V955.2026.SM.3GAFA.1	Breast	Training Set	Normal
GTEX.XQ3S.1326.SM.4BOPQ.1	Breast	Training Set	Normal
GTEX.12WSK.2226.SM.5GCO5.1	Breast	Training Set	Normal
GTEX.XQ8I.2426.SM.4WAXY.1	Breast	Training Set	Normal
GTEX.TKQ2.1826.SM.33HB2.1	Breast	Training Set	Normal
GTEX.11WQK.2426.SM.5GU5C.1	Breast	Training Set	Normal
GTEX.YFC4.1426.SM.5IFJG.1	Breast	Training Set	Normal
GTEX.WYVS.1726.SM.3NMAY.1	Breast	Training Set	Normal
GTEX.ZF3C.2326.SM.5S2MZ.1	Breast	Training Set	Normal
GTEX.12KS4.0126.SM.5Q5A5.1	Breast	Training Set	Normal
GTEX.XV7Q.2326.SM.4BRVZ.1	Breast	Training Set	Normal
GTEX.Y5V5.2126.SM.4WWFO.1	Breast	Training Set	Normal
GTEX.T6MO.0326.SM.32QOK.1	Breast	Training Set	Normal
GTEX.R3RS.0626.SM.48FE1.1	Breast	Training Set	Normal
GTEX.ZDXO.0126.SM.5S2ND.1	Breast	Training Set	Normal
GTEX.14753.2426.SM.5LU8U.1	Breast	Training Set	Normal
GTEX.R55F.1726.SM.2TF4R.1	Breast	Training Set	Normal
GTEX.TML8.1226.SM.32QON.1	Breast	Training Set	Normal
GTEX.WFON.1826.SM.3GILG.1	Breast	Training Set	Normal
GTEX.13QIC.2326.SM.5LU5N.1	Breast	Training Set	Normal
GTEX.ZQUD.1926.SM.51MSA.1	Breast	Training Set	Normal
GTEX.145MN.1926.SM.5SIAI.1	Breast	Training Set	Normal
GTEX.139T8.0826.SM.5L3DE.1	Breast	Training Set	Normal
GTEX.13NZ9.1026.SM.5MR5K.1	Breast	Training Set	Normal
GTEX.13D11.1026.SM.5IJFB.1	Breast	Training Set	Normal
GTEX.11EI6.0626.SM.5985T.1	Breast	Training Set	Normal
GTEX.ZF2S.2026.SM.5E461.1	Breast	Training Set	Normal
GTEX.147F4.2826.SM.5NQBN.1	Breast	Training Set	Normal
GTEX.YB5K.1626.SM.5IFIN.1	Breast	Training Set	Normal
GTEX.ZVT2.1826.SM.5NQ8W.1	Breast	Training Set	Normal
GTEX.S4UY.0726.SM.4AD6X.1	Breast	Training Set	Normal
GTEX.ZYW4.0826.SM.5GIDG.1	Breast	Training Set	Normal
GTEX.ZLFU.2126.SM.4WWEV.1	Breast	Training Set	Normal
GTEX.S4P3.1326.SM.4AD6V.1	Breast	Training Set	Normal
GTEX.ZEX8.2226.SM.57WC6.1	Breast	Training Set	Normal
GTEX.ZZPU.0626.SM.5E43T.1	Breast	Training Set	Normal
GTEX.TKQ1.0226.SM.33HB5.1	Breast	Training Set	Normal
GTEX.12WSN.1326.SM.5GCNT.1	Breast	Training Set	Normal
GTEX.X4XY.0926.SM.4E3JD.1	Breast	Training Set	Normal
GTEX.VJWN.0726.SM.3GIJ8.1	Breast	Training Set	Normal
GTEX.139T6.1626.SM.5PNYZ.1	Breast	Training Set	Normal
GTEX.RU72.0626.SM.46MUI.1	Breast	Training Set	Normal
GTEX.13O61.1826.SM.5KM4I.1	Breast	Training Set	Normal
GTEX.13S86.1226.SM.5S2OA.1	Breast	Training Set	Normal
GTEX.11TT1.2126.SM.5GU5Y.1	Breast	Training Set	Normal
GTEX.11ZTT.2326.SM.5EQLG.1	Breast	Training Set	Normal
GTEX.11WQC.1726.SM.5GU4W.1	Breast	Training Set	Normal
GTEX.ZV7C.1826.SM.5NQ83.1	Breast	Training Set	Normal
GTEX.ZAB4.2526.SM.5HL8M.1	Breast	Training Set	Normal
GTEX.XGQ4.0926.SM.4AT4U.1	Breast	Training Set	Normal
GTEX.T5JC.2126.SM.32PMO.1	Breast	Training Set	Normal
GTEX.Y8LW.1626.SM.5IFHX.1	Breast	Training Set	Normal
GTEX.13FHO.0826.SM.5L3E8.1	Breast	Training Set	Normal
GTEX.13W46.0826.SM.5LU3H.1	Breast	Training Set	Normal
GTEX.12WSB.0626.SM.59HJO.1	Breast	Training Set	Normal
GTEX.T5JW.2026.SM.4DM63.1	Breast	Training Set	Normal
GTEX.ZVZQ.0826.SM.51MRF.1	Breast	Training Set	Normal
GTEX.13PL6.2926.SM.5L3I2.1	Breast	Training Set	Normal
GTEX.11ONC.2126.SM.5HL6E.1	Breast	Training Set	Normal
GTEX.Y9LG.1426.SM.5IFJZ.1	Breast	Training Set	Normal
GTEX.T2YK.2226.SM.32QPT.1	Breast	Training Set	Normal
GTEX.WYBS.0926.SM.3NM94.1	Breast	Training Set	Normal
GTEX.13O3O.0826.SM.5K7WE.1	Breast	Training Set	Normal
GTEX.11PRG.0826.SM.5EQ6A.1	Breast	Training Set	Normal
GTEX.11TUW.1826.SM.5BC5D.1	Breast	Training Set	Normal
GTEX.11ZUS.0826.SM.5FQUY.1	Breast	Training Set	Normal
GTEX.ZUA1.1526.SM.59HLS.1	Breast	Training Set	Normal
GTEX.XMD2.0926.SM.4WWEF.1	Breast	Training Set	Normal
GTEX.ZT9W.2026.SM.51MRA.1	Breast	Training Set	Normal
GTEX.1314G.1226.SM.5BC6D.1	Breast	Training Set	Normal
GTEX.WOFL.0826.SM.3MJG1.1	Breast	Training Set	Normal
GTEX.13FTW.1426.SM.5LZWZ.1	Breast	Training Set	Normal
GTEX.13FTX.1126.SM.5N9EN.1	Breast	Training Set	Normal
GTEX.XMK1.1126.SM.4IHJ8.1	Breast	Training Set	Normal
GTEX.RUSQ.2026.SM.4GIAK.1	Breast	Training Set	Normal
GTEX.ZTTD.1026.SM.51MRD.1	Breast	Training Set	Normal
GTEX.U3ZH.1426.SM.4DXSR.1	Breast	Training Set	Normal
GTEX.13O3Q.2226.SM.5KM4O.1	Breast	Training Set	Normal
GTEX.REY6.2426.SM.48FF5.1	Breast	Training Set	Normal
GTEX.X4EP.2926.SM.3P5YQ.3	Breast	Training Set	Normal
GTEX.ZC5H.2626.SM.5J2MG.1	Breast	Training Set	Normal
GTEX.X4EP.2926.SM.3P5YQ.1	Breast	Training Set	Normal
GTEX.Y114.2026.SM.4TT7L.1	Breast	Training Set	Normal
GTEX.146FH.0826.SM.5SI8T.1	Breast	Training Set	Normal
GTEX.ZVE2.1226.SM.5NQ8R.1	Breast	Training Set	Normal
GTEX.X4EP.2926.SM.3P5YQ.2	Breast	Training Set	Normal
GTEX.117XS.1926.SM.5GICO.1	Breast	Training Set	Normal
GTEX.R53T.1526.SM.48FEK.1	Breast	Training Set	Normal
GTEX.145ME.1526.SM.5Q5F2.1	Breast	Training Set	Normal
GTEX.13FTY.2226.SM.5J1ND.1	Breast	Training Set	Normal
GTEX.YB5E.1726.SM.5IFJ3.1	Breast	Training Set	Normal
GTEX.QVJO.1826.SM.447C9.1	Breast	Training Set	Normal
GTEX.11EMC.2026.SM.5A5JV.1	Breast	Training Set	Normal
GTEX.Y5LM.1726.SM.4VDSX.1	Breast	Training Set	Normal
GTEX.TMMY.0726.SM.33HBE.1	Breast	Training Set	Normal
GTEX.ZLV1.1426.SM.4WWES.1	Breast	Training Set	Normal
GTEX.ZVT4.1026.SM.57WC4.1	Breast	Training Set	Normal
GTEX.W5X1.2326.SM.3GIL6.1	Breast	Training Set	Normal
GTEX.WXYG.2226.SM.4E3IM.1	Breast	Training Set	Normal
GTEX.PSDG.1626.SM.48TCQ.1	Breast	Training Set	Normal
GTEX.11EQ9.1826.SM.5Q5AJ.1	Breast	Training Set	Normal
GTEX.132AR.0826.SM.5EGK6.1	Breast	Training Set	Normal
GTEX.ZDTT.2126.SM.5S2OJ.1	Breast	Training Set	Normal
GTEX.ZWKS.2826.SM.5NQ74.1	Breast	Training Set	Normal
GTEX.S32W.2026.SM.4AD6E.1	Breast	Training Set	Normal
GTEX.ZV6S.1826.SM.5NQ8D.1	Breast	Training Set	Normal
GTEX.UJHI.1426.SM.3DB9C.1	Breast	Training Set	Normal
GTEX.RU1J.0626.SM.4WAWY.1	Breast	Training Set	Normal
GTEX.11DXY.2326.SM.5GICW.1	Breast	Training Set	Normal
GTEX.11P82.1326.SM.5HL62.1	Breast	Training Set	Normal
GTEX.13PVQ.1026.SM.5KM3M.1	Breast	Training Set	Normal
GTEX.11P7K.0726.SM.5EGKX.1	Breast	Training Set	Normal
GTEX.QEG5.0726.SM.4R1JQ.1	Breast	Training Set	Normal
GTEX.13OW8.0226.SM.5K7UP.1	Breast	Training Set	Normal
GTEX.13O3P.0826.SM.5L3DH.1	Breast	Training Set	Normal
GTEX.YFCO.1826.SM.4W1YH.1	Breast	Training Set	Normal
GTEX.11OF3.1926.SM.59889.1	Breast	Training Set	Normal
GTEX.U3ZN.1926.SM.4DXSG.1	Breast	Training Set	Normal
GTEX.QDT8.0626.SM.48TYW.1	Breast	Training Set	Normal
GTEX.Q2AG.0326.SM.48U1O.1	Breast	Training Set	Normal
GTEX.1313W.0826.SM.5EQ4T.1	Breast	Training Set	Normal
GTEX.11P81.1926.SM.5BC53.1	Breast	Training Set	Normal
GTEX.SE5C.2126.SM.4BRUJ.1	Breast	Training Set	Normal
GTEX.XOT4.0726.SM.4GIAW.1	Breast	Training Set	Normal
GTEX.ZVTK.0326.SM.51MRR.1	Breast	Training Set	Normal
GTEX.Y3IK.2326.SM.4WWDT.1	Breast	Training Set	Normal
GTEX.QMRM.1626.SM.4R1KV.1	Breast	Training Set	Normal
GTEX.131YS.0626.SM.5EGKL.1	Breast	Training Set	Normal
GTEX.13NZB.2126.SM.5MR4Y.1	Breast	Training Set	Normal
GTEX.13W3W.1226.SM.5LU4H.1	Breast	Training Set	Normal
GTEX.XUZC.1626.SM.4BRVP.1	Breast	Training Set	Normal
GTEX.13CF3.2126.SM.5IFJP.1	Breast	Training Set	Normal
GTEX.ZY6K.1626.SM.5GZWV.1	Breast	Training Set	Normal
GTEX.ZA64.1526.SM.5CVMD.1	Breast	Training Set	Normal
GTEX.ZYT6.0126.SM.5E45J.1	Breast	Training Set	Normal
GTEX.ZPIC.1126.SM.5BC7F.1	Breast	Training Set	Normal
GTEX.11GS4.2126.SM.5A5KR.1	Breast	Training Set	Normal
GTEX.WRHU.0326.SM.3MJFY.1	Breast	Training Set	Normal
GTEX.T6MN.0726.SM.32PML.1	Breast	Training Set	Normal
GTEX.1117F.2826.SM.5GZXL.1	Breast	Training Set	Normal
GTEX.12BJ1.1826.SM.5HL9N.1	Breast	Training Set	Normal
GTEX.X261.0626.SM.3NMD9.1	Breast	Training Set	Normal
GTEX.144GM.0926.SM.5O994.1	Breast	Training Set	Normal
GTEX.SIU7.1626.SM.4BRUK.1	Breast	Training Set	Normal
GTEX.S341.1526.SM.4AD6K.1	Breast	Training Set	Normal
GTEX.11DZ1.0326.SM.5N9BN.1	Breast	Training Set	Normal
GTEX.X15G.1626.SM.3NMB3.1	Breast	Training Set	Normal
GTEX.UPK5.2326.SM.3P5Z8.1	Breast	Training Set	Normal
GTEX.ZDTT.2126.SM.5S2O7.1	Breast	Training Set	Normal
GTEX.11NV4.2026.SM.5N9DG.1	Breast	Training Set	Normal
GTEX.YJ8O.2226.SM.5IFHW.1	Breast	Training Set	Normal
GTEX.14AS3.1626.SM.5S2OY.1	Breast	Training Set	Normal
GTEX.U412.1826.SM.4DXTJ.1	Breast	Training Set	Normal
GTEX.R55D.0826.SM.48FEA.1	Breast	Training Set	Normal
GTEX.S33H.0326.SM.4AD6N.1	Breast	Training Set	Normal
GTEX.13113.1726.SM.5GCOO.1	Breast	Training Set	Normal
GTEX.ZYWO.2326.SM.5GZY4.1	Breast	Training Set	Normal
GTEX.XBED.1626.SM.47JYN.1	Breast	Training Set	Normal
GTEX.ZF29.1926.SM.5S2P1.1	Breast	Training Set	Normal
GTEX.UTHO.1026.SM.3GAF7.1	Breast	Training Set	Normal
GTEX.XYKS.1326.SM.4BRUN.1	Breast	Training Set	Normal
GTEX.11O72.2126.SM.5N9FO.1	Breast	Training Set	Normal
GTEX.1192X.2326.SM.5987X.1	Breast	Training Set	Normal
GTEX.QEL4.2126.SM.447AE.1	Breast	Training Set	Normal
GTEX.ZZ64.1226.SM.5E43R.1	Breast	Training Set	Normal
GTEX.131XW.0726.SM.5EGK3.1	Breast	Training Set	Normal
GTEX.132Q8.1426.SM.5EGK7.1	Breast	Training Set	Normal
GTEX.11GSO.1926.SM.5A5K3.1	Breast	Training Set	Normal
GTEX.YEC3.1026.SM.5IFI5.1	Breast	Training Set	Normal
GTEX.T2IS.1526.SM.32QPR.1	Breast	Training Set	Normal
GTEX.S7SE.0826.SM.4AT4D.1	Breast	Training Set	Normal
GTEX.XMD1.0826.SM.4AT52.1	Breast	Training Set	Normal
GTEX.14ABY.2126.SM.5QGQZ.1	Breast	Training Set	Normal
GTEX.145MO.0826.SM.5NQBL.1	Breast	Training Set	Normal
GTEX.WYJK.1326.SM.3NB2T.1	Breast	Training Set	Normal
GTEX.Y3I4.1526.SM.4TT7K.1	Breast	Training Set	Normal
GTEX.XUJ4.1926.SM.4BOOV.1	Breast	Training Set	Normal
GTEX.1211K.1926.SM.5EQLB.1	Breast	Training Set	Normal
GTEX.111YS.1926.SM.5GICC.1	Breast	Training Set	Normal
GTEX.139TU.0626.SM.5KM3X.1	Breast	Training Set	Normal
GTEX.145LT.0726.SM.5S2VM.1	Breast	Training Set	Normal
GTEX.11DXW.0626.SM.5N9ER.1	Breast	Training Set	Normal
GTEX.11ILO.2226.SM.5A5L1.1	Breast	Training Set	Normal
GTEX.ZQG8.0726.SM.5P9H9.1	Breast	Training Set	Normal
GTEX.14E6E.1326.SM.5S2NR.1	Breast	Training Set	Normal
GTEX.XUW1.2326.SM.4BOO5.1	Breast	Training Set	Normal
GTEX.11DXZ.1926.SM.5GZZL.1	Breast	Training Set	Normal
GTEX.VUSG.2226.SM.4KKZO.1	Breast	Training Set	Normal
GTEX.117YX.1426.SM.5H12H.1	Breast	Training Set	Normal
GTEX.13NZ8.0126.SM.5IJCT.1	Breast	Training Set	Normal
GTEX.11NSD.0926.SM.5N9DR.1	Breast	Training Set	Normal
GTEX.S4Q7.1126.SM.4AD6R.1	Breast	Training Set	Normal
GTEX.13OW5.2226.SM.5L3HC.1	Breast	Training Set	Normal
GTEX.144GL.2026.SM.5LU3O.1	Breast	Training Set	Normal
GTEX.11EM3.1326.SM.5N9C6.1	Breast	Training Set	Normal
GTEX.11I78.2226.SM.5PNYA.1	Breast	Training Set	Normal
GTEX.Y5V6.2126.SM.4WWFX.1	Breast	Training Set	Normal
GTEX.ZU9S.1926.SM.5NQBP.1	Breast	Training Set	Normal
GTEX.133LE.1726.SM.5K7VQ.1	Breast	Training Set	Normal
GTEX.132NY.0826.SM.5K7Y7.1	Breast	Training Set	Normal
GTEX.1269C.2426.SM.5FQSN.1	Breast	Training Set	Normal
GTEX.RWS6.1926.SM.47JXY.1	Breast	Training Set	Normal
GTEX.Y111.2026.SM.4SOJA.1	Breast	Training Set	Normal
GTEX.13N1W.0626.SM.5MR4U.1	Breast	Training Set	Normal
GTEX.WI4N.1426.SM.3LK7H.1	Breast	Training Set	Normal
GTEX.ZDYS.1126.SM.5K7UB.1	Breast	Training Set	Normal
GTEX.WY7C.2726.SM.3NB3P.1	Breast	Training Set	Normal
GTEX.11LCK.2426.SM.5HL5F.1	Breast	Training Set	Normal
GTEX.ZXES.0826.SM.5E43C.1	Breast	Training Set	Normal
GTEX.U8XE.0826.SM.4E3J1.1	Breast	Training Set	Normal
GTEX.ZAJG.0626.SM.5HL8X.1	Breast	Training Set	Normal
GTEX.ZGAY.1726.SM.DO91P.1	Breast	Training Set	Normal
GTEX.14PKU.0426.SM.6EU1P.1	Breast	Training Set	Normal
GTEX.QEG5.0726.SM.D4P1T.1	Breast	Training Set	Normal
GTEX.QMRM.1626.SM.D4P1U.1	Breast	Training Set	Normal
GTEX.14ICK.2426.SM.6EU27.1	Breast	Training Set	Normal
GTEX.1F5PK.2126.SM.7PC28.1	Breast	Training Set	Normal
GTEX.1OKEX.0826.SM.E9J2B.1	Breast	Training Set	Normal
GTEX.ZLWG.1926.SM.DO92J.1	Breast	Training Set	Normal
GTEX.1QP28.1226.SM.E9J2M.1	Breast	Training Set	Normal
GTEX.1NHNU.0926.SM.E9J2T.1	Breast	Training Set	Normal
GTEX.1JMQK.2626.SM.COH2W.1	Breast	Training Set	Normal
GTEX.1J8Q2.2726.SM.A9G2X.1	Breast	Training Set	Normal
GTEX.ZLV1.1426.SM.DO92Z.1	Breast	Training Set	Normal
GTEX.ZLFU.2126.SM.DO931.1	Breast	Training Set	Normal
GTEX.1JMPZ.1626.SM.COH31.1	Breast	Training Set	Normal
GTEX.1N2EF.2226.SM.E9J33.1	Breast	Training Set	Normal
GTEX.1HR98.0426.SM.COH36.1	Breast	Training Set	Normal
GTEX.1J8EW.2626.SM.CL53E.1	Breast	Training Set	Normal
GTEX.1MJK3.1126.SM.E9J3F.1	Breast	Training Set	Normal
GTEX.1GPI7.0926.SM.7PC3J.1	Breast	Training Set	Normal
GTEX.1KD4Q.2326.SM.D4P3M.1	Breast	Training Set	Normal
GTEX.1I1GP.0426.SM.COH3N.1	Breast	Training Set	Normal
GTEX.1IKJJ.2326.SM.COH3U.1	Breast	Training Set	Normal
GTEX.1LC47.1226.SM.D4P44.1	Breast	Training Set	Normal
GTEX.1R9JW.0326.SM.EAZ45.1	Breast	Training Set	Normal
GTEX.1QMI2.0726.SM.E9J4F.1	Breast	Training Set	Normal
GTEX.18D9A.1526.SM.7LG4J.1	Breast	Training Set	Normal
GTEX.18A6Q.0926.SM.7LG4N.1	Breast	Training Set	Normal
GTEX.1JMPY.0526.SM.CL54O.1	Breast	Training Set	Normal
GTEX.17MFQ.0926.SM.7LG4S.1	Breast	Training Set	Normal
GTEX.17KNJ.2026.SM.7LG53.1	Breast	Training Set	Normal
GTEX.18A7B.2626.SM.7LG55.1	Breast	Training Set	Normal
GTEX.17EVQ.0426.SM.7LG57.1	Breast	Training Set	Normal
GTEX.1MA7X.1626.SM.E9U5B.1	Breast	Training Set	Normal
GTEX.1I19N.2826.SM.CL55D.1	Breast	Training Set	Normal
GTEX.1M4P7.2626.SM.E9U5F.1	Breast	Training Set	Normal
GTEX.1LSNL.2826.SM.E9U5L.1	Breast	Training Set	Normal
GTEX.18A66.1726.SM.7LG5N.1	Breast	Training Set	Normal
GTEX.1M5QR.2526.SM.E9U5P.1	Breast	Training Set	Normal
GTEX.17GQL.0326.SM.7LG5U.1	Breast	Training Set	Normal
GTEX.1NUQO.2226.SM.E9U68.1	Breast	Training Set	Normal
GTEX.1GZHY.0726.SM.9WG6B.1	Breast	Training Set	Normal
GTEX.15UF7.0726.SM.6M46D.1	Breast	Training Set	Normal
GTEX.1S82U.1126.SM.E9U6I.1	Breast	Training Set	Normal
GTEX.1GN2E.2226.SM.9WG6J.1	Breast	Training Set	Normal
GTEX.1C475.1226.SM.7SB72.1	Breast	Training Set	Normal
GTEX.1H1CY.2226.SM.9WG7E.1	Breast	Training Set	Normal
GTEX.13113.5013.SM.7SB7G.1	Breast	Training Set	Normal
GTEX.1I1GT.1126.SM.ARL7J.1	Breast	Training Set	Normal
GTEX.1H23P.0726.SM.9WG7K.1	Breast	Training Set	Normal
GTEX.1F75I.2026.SM.7SB7N.1	Breast	Training Set	Normal
GTEX.1EWIQ.1726.SM.7SB7T.1	Breast	Training Set	Normal
GTEX.1I6K6.0826.SM.ARL7Z.1	Breast	Training Set	Normal
GTEX.1R9PN.0326.SM.DTX85.1	Breast	Training Set	Normal
GTEX.1IDJF.2326.SM.ARL86.1	Breast	Training Set	Normal
GTEX.1C6WA.2426.SM.7SB86.1	Breast	Training Set	Normal
GTEX.1POEN.0926.SM.DTX88.1	Breast	Training Set	Normal
GTEX.1F75B.0626.SM.7SB8A.1	Breast	Training Set	Normal
GTEX.1IE54.0626.SM.ARL8D.1	Breast	Training Set	Normal
GTEX.1IOXB.1926.SM.ARL8E.1	Breast	Training Set	Normal
GTEX.1F6I4.2526.SM.7SB8F.1	Breast	Training Set	Normal
GTEX.1F75A.1826.SM.7SB8G.1	Breast	Training Set	Normal
GTEX.15G19.2126.SM.6M48J.1	Breast	Training Set	Normal
GTEX.1GF9V.2526.SM.7SB8K.1	Breast	Training Set	Normal
GTEX.1JJE9.2326.SM.ARL8Q.1	Breast	Training Set	Normal
GTEX.1JJEA.2726.SM.ARL8V.1	Breast	Training Set	Normal
GTEX.1JK1U.1826.SM.ARL8W.1	Breast	Training Set	Normal
GTEX.14PHY.1926.SM.5YY95.1	Breast	Training Set	Normal
GTEX.1JN6P.2426.SM.ARL99.1	Breast	Training Set	Normal
GTEX.1HBPM.0126.SM.ARL9E.1	Breast	Training Set	Normal
GTEX.1B98T.0726.SM.7939J.1	Breast	Training Set	Normal
GTEX.183WM.0726.SM.7LTAA.1	Breast	Training Set	Normal
GTEX.1AMEY.1026.SM.718AA.1	Breast	Training Set	Normal
GTEX.16NGA.0826.SM.718AF.1	Breast	Training Set	Normal
GTEX.18A7A.0726.SM.7LTAI.1	Breast	Training Set	Normal
GTEX.1A8G7.2426.SM.731AK.1	Breast	Training Set	Normal
GTEX.18465.2026.SM.718AP.1	Breast	Training Set	Normal
GTEX.145ME.5010.SM.793AR.1	Breast	Training Set	Normal
GTEX.ZAK1.1326.SM.EVYAS.1	Breast	Training Set	Normal
GTEX.14BMV.0626.SM.793AU.1	Breast	Training Set	Normal
GTEX.1AX8Z.0926.SM.731AW.1	Breast	Training Set	Normal
GTEX.18QFQ.0826.SM.718AX.1	Breast	Training Set	Normal
GTEX.14H4A.2526.SM.5YYAY.1	Breast	Training Set	Normal
GTEX.1A3MX.2726.SM.718B6.1	Breast	Training Set	Normal
GTEX.1AX9J.1126.SM.731B7.1	Breast	Training Set	Normal
GTEX.1QPFJ.2026.SM.EVYBE.1	Breast	Training Set	Normal
GTEX.1R9PM.1826.SM.EVYBH.1	Breast	Training Set	Normal
GTEX.1PPGY.1526.SM.EVYBK.1	Breast	Training Set	Normal
GTEX.1CAMR.1426.SM.793BO.1	Breast	Training Set	Normal
GTEX.17HHY.0926.SM.793C1.1	Breast	Training Set	Normal
GTEX.1A3MV.1626.SM.731C1.1	Breast	Training Set	Normal
GTEX.19HZE.0426.SM.731C8.1	Breast	Training Set	Normal
GTEX.1MJK2.2226.SM.EVYCR.1	Breast	Training Set	Normal
GTEX.1RLM8.2226.SM.EVYD1.1	Breast	Training Set	Normal
GTEX.15EOM.5019.SM.793DK.1	Breast	Training Set	Normal
GTEX.1RQEC.2026.SM.DTXDM.1	Breast	Training Set	Normal
GTEX.1QCLZ.2326.SM.DTXDO.1	Breast	Training Set	Normal
GTEX.13SLW.2526.SM.62LDQ.1	Breast	Training Set	Normal
GTEX.14B4R.1226.SM.5TDDT.1	Breast	Training Set	Normal
GTEX.17F97.2526.SM.7EWDV.1	Breast	Training Set	Normal
GTEX.1QCLY.1626.SM.DTXDW.1	Breast	Training Set	Normal
GTEX.1QW4Y.1026.SM.DTXE2.1	Breast	Training Set	Normal
GTEX.14BMU.1626.SM.5TDE7.1	Breast	Training Set	Normal
GTEX.16BQI.1026.SM.7KUEA.1	Breast	Training Set	Normal
GTEX.14A5I.0726.SM.5TDEB.1	Breast	Training Set	Normal
GTEX.1HT8W.2226.SM.CGQEC.1	Breast	Training Set	Normal
GTEX.1BAJH.0826.SM.7EWEF.1	Breast	Training Set	Normal
GTEX.14DAR.1326.SM.7DUEG.1	Breast	Training Set	Normal
GTEX.14E7W.0826.SM.62LEJ.1	Breast	Training Set	Normal
GTEX.1KAFJ.0226.SM.DIPEL.1	Breast	Training Set	Normal
GTEX.14E6C.1326.SM.62LEQ.1	Breast	Training Set	Normal
GTEX.1N5O9.1126.SM.DTXEQ.1	Breast	Training Set	Normal
GTEX.1QEPI.0926.SM.DTXF3.1	Breast	Training Set	Normal
GTEX.1LNCM.0226.SM.DIPF4.1	Breast	Training Set	Normal
GTEX.17EUY.1926.SM.7DUF6.1	Breast	Training Set	Normal
GTEX.1CB4J.1826.SM.7EWF9.1	Breast	Training Set	Normal
GTEX.1KANA.2026.SM.DIPFB.1	Breast	Training Set	Normal
GTEX.14LLW.0626.SM.62LFC.1	Breast	Training Set	Normal
GTEX.1EU9M.2826.SM.7EWFH.1	Breast	Training Set	Normal
GTEX.1I1GV.2426.SM.CGQFM.1	Breast	Training Set	Normal
GTEX.14PN4.0626.SM.62LFP.1	Breast	Training Set	Normal
GTEX.1HFI7.0126.SM.CGQFQ.1	Breast	Training Set	Normal
GTEX.1K9T9.1426.SM.DIPFQ.1	Breast	Training Set	Normal
GTEX.1C64O.0726.SM.7DUFU.1	Breast	Training Set	Normal
GTEX.15FZZ.0726.SM.7KUFZ.1	Breast	Training Set	Normal
GTEX.1IY9M.2726.SM.CMKG5.1	Breast	Training Set	Normal
GTEX.1B8KZ.1526.SM.7DUG7.1	Breast	Training Set	Normal
GTEX.ZTPG.2826.SM.57WGA.1	Breast	Training Set	Normal
GTEX.1JKYR.0926.SM.CMKGJ.1	Breast	Training Set	Normal
GTEX.1JN1M.3026.SM.CMKGK.1	Breast	Training Set	Normal
GTEX.1JMLX.2026.SM.CMKGN.1	Breast	Training Set	Normal
GTEX.1K2DA.1726.SM.CGQGS.1	Breast	Training Set	Normal
GTEX.1JMOU.2026.SM.CMKGU.1	Breast	Training Set	Normal
GTEX.1HSKV.2026.SM.CMKGX.1	Breast	Training Set	Normal
GTEX.17JCI.0726.SM.7EPH1.1	Breast	Training Set	Normal
GTEX.17HHE.1426.SM.7EPH4.1	Breast	Training Set	Normal
GTEX.17MF6.0326.SM.7EPH5.1	Breast	Training Set	Normal
GTEX.1IGQW.0926.SM.ADEH6.1	Breast	Training Set	Normal
GTEX.1C6VS.0726.SM.7EPHF.1	Breast	Training Set	Normal
GTEX.1GMR3.2626.SM.7RHHG.1	Breast	Training Set	Normal
GTEX.1HCU8.0126.SM.ADEHH.1	Breast	Training Set	Normal
GTEX.WHSB.1926.SM.EXOHH.1	Breast	Training Set	Normal
GTEX.1I1GU.1026.SM.ADEHJ.1	Breast	Training Set	Normal
GTEX.1GPI6.0626.SM.7RHHJ.1	Breast	Training Set	Normal
GTEX.1HSEH.2026.SM.ADEHN.1	Breast	Training Set	Normal
GTEX.WFG8.2026.SM.EXOHO.1	Breast	Training Set	Normal
GTEX.1IDJU.1826.SM.CMKHV.1	Breast	Training Set	Normal
GTEX.1S82Z.0726.SM.E6CHX.1	Breast	Training Set	Normal
GTEX.1I1HK.2426.SM.ADEHX.1	Breast	Training Set	Normal
GTEX.1J8Q3.1326.SM.CMKI1.1	Breast	Training Set	Normal
GTEX.1F5PL.1026.SM.7RHI1.1	Breast	Training Set	Normal
GTEX.1KXAM.1026.SM.CY8IA.1	Breast	Training Set	Normal
GTEX.1L5NE.2126.SM.CY8IH.1	Breast	Training Set	Normal
GTEX.1HC8U.0826.SM.ADEIL.1	Breast	Training Set	Normal
GTEX.1HCU7.1026.SM.ADEIP.1	Breast	Training Set	Normal
GTEX.145MF.2226.SM.7EPIR.1	Breast	Training Set	Normal
GTEX.1MCYP.0126.SM.E6CIS.1	Breast	Training Set	Normal
GTEX.1HSMO.0826.SM.ADEIV.1	Breast	Training Set	Normal
GTEX.1LSNM.1326.SM.E9TJ1.1	Breast	Training Set	Normal
GTEX.1HKZK.1826.SM.ADEJ2.1	Breast	Training Set	Normal
GTEX.1LVAM.0926.SM.E9TJ2.1	Breast	Training Set	Normal
GTEX.1HCVE.2626.SM.ADEJ8.1	Breast	Training Set	Normal
GTEX.1IDJH.2226.SM.E6CJV.1	Breast	Training Set	Normal
GTEX.1LSVX.2426.SM.E6CJX.1	Breast	Training Set	Normal
GTEX.1H11D.1526.SM.9MQJY.1	Breast	Training Set	Normal
GTEX.1GZ4I.2826.SM.9MQK5.1	Breast	Training Set	Normal
GTEX.17F98.0526.SM.79OK5.1	Breast	Training Set	Normal
GTEX.17HGU.1326.SM.79OKB.1	Breast	Training Set	Normal
GTEX.13QJ3.0826.SM.7DHKK.1	Breast	Training Set	Normal
GTEX.13PVR.2226.SM.7DHKP.1	Breast	Training Set	Normal
GTEX.1H4P4.2226.SM.9MQKQ.1	Breast	Training Set	Normal
GTEX.1H1ZS.0126.SM.9YFKQ.1	Breast	Training Set	Normal
GTEX.1B97I.0426.SM.79OL7.1	Breast	Training Set	Normal
GTEX.15SHW.1326.SM.6PAL8.1	Breast	Training Set	Normal
GTEX.183FY.1126.SM.7DHLJ.1	Breast	Training Set	Normal
GTEX.1I6K7.1026.SM.A9SLK.1	Breast	Training Set	Normal
GTEX.1H1DG.0526.SM.9YFLN.1	Breast	Training Set	Normal
GTEX.17F96.2426.SM.7IGLN.1	Breast	Training Set	Normal
GTEX.1B97J.0426.SM.79OLQ.1	Breast	Training Set	Normal
GTEX.1H1E6.0926.SM.9YFLT.1	Breast	Training Set	Normal
GTEX.Z9EW.1526.SM.EZ6LU.1	Breast	Training Set	Normal
GTEX.YECK.0726.SM.EZ6LV.1	Breast	Training Set	Normal
GTEX.1CB4E.0226.SM.79OLW.1	Breast	Training Set	Normal
GTEX.1GMR2.1926.SM.9MQLZ.1	Breast	Training Set	Normal
GTEX.1I1GQ.0726.SM.ARZM4.1	Breast	Training Set	Normal
GTEX.13VXU.2826.SM.664MA.1	Breast	Training Set	Normal
GTEX.X62O.0526.SM.EWRMA.1	Breast	Training Set	Normal
GTEX.15UF6.0126.SM.6PAMB.1	Breast	Training Set	Normal
GTEX.1NV8Z.2826.SM.E8VME.1	Breast	Training Set	Normal
GTEX.1HSGN.1526.SM.A9SMO.1	Breast	Training Set	Normal
GTEX.1QP9N.1826.SM.E8VMP.1	Breast	Training Set	Normal
GTEX.1QP29.1726.SM.E8VMQ.1	Breast	Training Set	Normal
GTEX.1R7EU.1226.SM.E8VMR.1	Breast	Training Set	Normal
GTEX.1RAZS.1226.SM.E8VMT.1	Breast	Training Set	Normal
GTEX.1J8QM.2026.SM.ARZMW.1	Breast	Training Set	Normal
GTEX.15ETS.0626.SM.7KUMX.1	Breast	Training Set	Normal
GTEX.1JKYN.0726.SM.ARZMY.1	Breast	Training Set	Normal
GTEX.16YQH.2826.SM.6PAMY.1	Breast	Training Set	Normal
GTEX.15ER7.1626.SM.6PAMZ.1	Breast	Training Set	Normal
GTEX.1R46S.2526.SM.E8VN2.1	Breast	Training Set	Normal
GTEX.ZF3C.2326.SM.5S2NC.1	Breast	Training Set	Normal
GTEX.17EVP.0226.SM.79OND.1	Breast	Training Set	Normal
GTEX.17HG3.0126.SM.7IGNH.1	Breast	Training Set	Normal
GTEX.1RAZQ.1226.SM.EWRNL.1	Breast	Training Set	Normal
GTEX.1N2EE.2126.SM.E8VNN.1	Breast	Training Set	Normal
GTEX.1PPH7.0826.SM.E8VNX.1	Breast	Training Set	Normal
GTEX.1IDJE.0826.SM.CKZNZ.1	Breast	Training Set	Normal
GTEX.1B933.2526.SM.7IGO5.1	Breast	Training Set	Normal
GTEX.14PJO.0726.SM.69LO8.1	Breast	Training Set	Normal
GTEX.1R7EV.1526.SM.E8VOD.1	Breast	Training Set	Normal
GTEX.1CB4G.2326.SM.79OOI.1	Breast	Training Set	Normal
GTEX.ZDTT.2126.SM.DKPOM.1	Breast	Training Set	Normal
GTEX.1MCC2.2126.SM.EWRON.1	Breast	Training Set	Normal
GTEX.15DCZ.0726.SM.69LOV.1	Breast	Training Set	Normal
GTEX.1C6VQ.0426.SM.79OOX.1	Breast	Training Set	Normal
GTEX.1B8SG.1226.SM.7IGPF.1	Breast	Training Set	Normal
GTEX.1CAMS.1426.SM.7IGPM.1	Breast	Training Set	Normal
GTEX.1HBPN.2326.SM.9WPPU.1	Breast	Training Set	Normal
GTEX.1P4AB.1826.SM.E76PU.1	Breast	Training Set	Normal
GTEX.1E2YA.2726.SM.7IGPW.1	Breast	Training Set	Normal
GTEX.1EKGG.2626.SM.7IGPY.1	Breast	Training Set	Normal
GTEX.1KD5A.1926.SM.DKPQA.1	Breast	Training Set	Normal
GTEX.1LVAN.1326.SM.CNPQE.1	Breast	Training Set	Normal
GTEX.1MA7W.1026.SM.DKPQK.1	Breast	Training Set	Normal
GTEX.1LGRB.1826.SM.CNPQL.1	Breast	Training Set	Normal
GTEX.1GZ4H.0326.SM.7P8QX.1	Breast	Training Set	Normal
GTEX.1HCU9.0326.SM.9WYSC.1	Breast	Training Set	Normal
GTEX.11GSP.0926.SM.9WYSG.1	Breast	Training Set	Normal
GTEX.1HUB1.1626.SM.CM2SL.1	Breast	Training Set	Normal
GTEX.1PDJ9.1126.SM.EXUSW.1	Breast	Training Set	Normal
GTEX.15RJE.2626.SM.7KFT1.1	Breast	Training Set	Normal
GTEX.1IKOE.1326.SM.CE6T6.1	Breast	Training Set	Normal
GTEX.1GMRU.0826.SM.9WYT7.1	Breast	Training Set	Normal
GTEX.1KANC.1426.SM.CYPT9.1	Breast	Training Set	Normal
GTEX.1B8L1.2426.SM.9WYTE.1	Breast	Training Set	Normal
GTEX.1GN1W.1926.SM.7P8TH.1	Breast	Training Set	Normal
GTEX.1I4MK.1626.SM.CM2TJ.1	Breast	Training Set	Normal
GTEX.1GN1U.0526.SM.9KNTT.1	Breast	Training Set	Normal
GTEX.1IKOH.2326.SM.CM2TW.1	Breast	Training Set	Normal
GTEX.1GZ2Q.2626.SM.7MXV9.1	Breast	Training Set	Normal
GTEX.1GMR8.0726.SM.9KNVI.1	Breast	Training Set	Normal
GTEX.1ICLY.1726.SM.B2LVT.1	Breast	Training Set	Normal
GTEX.1HCUA.0726.SM.ACKVU.1	Breast	Training Set	Normal
GTEX.1IDFM.0426.SM.B2LVV.1	Breast	Training Set	Normal
GTEX.17F9E.2526.SM.7MGW2.1	Breast	Training Set	Normal
GTEX.1ICLZ.0426.SM.B2LW2.1	Breast	Training Set	Normal
GTEX.13SLX.2326.SM.5ZZWE.1	Breast	Training Set	Normal
GTEX.1B8KE.1226.SM.73KWK.1	Breast	Training Set	Normal
GTEX.1AX8Y.1026.SM.73KWL.1	Breast	Training Set	Normal
GTEX.169BO.1126.SM.7MGWN.1	Breast	Training Set	Normal
GTEX.1ICG6.1326.SM.ACKWR.1	Breast	Training Set	Normal
GTEX.1AX9I.0726.SM.73KWV.1	Breast	Training Set	Normal
GTEX.1GF9X.1026.SM.ACKX2.1	Breast	Training Set	Normal
GTEX.1H3VY.0926.SM.ACKXE.1	Breast	Training Set	Normal
GTEX.1B932.0826.SM.73KXG.1	Breast	Training Set	Normal
GTEX.1HR9M.2426.SM.ACKXI.1	Breast	Training Set	Normal
GTEX.1EN7A.1426.SM.7PBY4.1	Breast	Training Set	Normal
GTEX.1GF9U.1726.SM.7MGY5.1	Breast	Training Set	Normal
GTEX.1LBAC.0926.SM.CXKY9.1	Breast	Training Set	Normal
GTEX.1LG7Z.0726.SM.CXKYD.1	Breast	Training Set	Normal
GTEX.14PJ4.2126.SM.6ETZJ.1	Breast	Training Set	Normal
GTEX.15CHS.0826.SM.6ETZW.1	Breast	Training Set	Normal
GTEX.132AR.2726.SM.5PNVN.1	Colon	Training Set	Normal
GTEX.13PVR.1726.SM.5Q5EC.1	Colon	Training Set	Normal
GTEX.13OW5.2626.SM.5MR3M.1	Colon	Training Set	Normal
GTEX.146FQ.1926.SM.5NQBY.1	Colon	Training Set	Normal
GTEX.13W3W.2126.SM.5K7UX.1	Colon	Training Set	Normal
GTEX.13CF3.1326.SM.5LZXZ.1	Colon	Training Set	Normal
GTEX.11P7K.1526.SM.5EGI7.1	Colon	Training Set	Normal
GTEX.13D11.0826.SM.5KLZJ.1	Colon	Training Set	Normal
GTEX.145MN.1726.SM.5SIA6.1	Colon	Training Set	Normal
GTEX.PX3G.1426.SM.48U1J.1	Colon	Training Set	Normal
GTEX.12WSG.2426.SM.5EQLZ.1	Colon	Training Set	Normal
GTEX.ZP4G.1726.SM.4WWCM.1	Colon	Training Set	Normal
GTEX.14AS3.1126.SM.5Q5CR.1	Colon	Training Set	Normal
GTEX.XGQ4.1726.SM.4RH4G.1	Colon	Training Set	Normal
GTEX.S4Q7.0826.SM.4AD5E.1	Colon	Training Set	Normal
GTEX.WRHK.1126.SM.4MVOJ.1	Colon	Training Set	Normal
GTEX.WFG8.1726.SM.4LVM6.1	Colon	Training Set	Normal
GTEX.ZPIC.2226.SM.57WDX.1	Colon	Training Set	Normal
GTEX.YB5E.1626.SM.5IFIQ.1	Colon	Training Set	Normal
GTEX.1122O.1426.SM.5H11R.1	Colon	Training Set	Normal
GTEX.11DXX.1826.SM.5H126.1	Colon	Training Set	Normal
GTEX.Y114.1526.SM.4TT79.1	Colon	Training Set	Normal
GTEX.W5WG.2026.SM.4LMIB.1	Colon	Training Set	Normal
GTEX.111CU.1426.SM.5GZYP.1	Colon	Training Set	Normal
GTEX.11EM3.1526.SM.5A5KN.1	Colon	Training Set	Normal
GTEX.13S86.1626.SM.5Q5C5.1	Colon	Training Set	Normal
GTEX.UJMC.1326.SM.4IHLS.1	Colon	Training Set	Normal
GTEX.ZPU1.1926.SM.57WDT.1	Colon	Training Set	Normal
GTEX.11GSP.1626.SM.5986N.1	Colon	Training Set	Normal
GTEX.ZT9W.1726.SM.51MS3.1	Colon	Training Set	Normal
GTEX.117YX.0526.SM.5EGJH.1	Colon	Training Set	Normal
GTEX.TKQ2.1326.SM.4DXT9.1	Colon	Training Set	Normal
GTEX.11TTK.2426.SM.5PNYO.1	Colon	Training Set	Normal
GTEX.1212Z.1826.SM.5FQSH.1	Colon	Training Set	Normal
GTEX.ZF29.1826.SM.4WKG8.1	Colon	Training Set	Normal
GTEX.WOFM.2026.SM.4OOSQ.1	Colon	Training Set	Normal
GTEX.P78B.1726.SM.3P5ZV.1	Colon	Training Set	Normal
GTEX.ZVZP.2026.SM.57WB3.1	Colon	Training Set	Normal
GTEX.11I78.1226.SM.5A5K6.1	Colon	Training Set	Normal
GTEX.WI4N.2226.SM.4OOS9.1	Colon	Training Set	Normal
GTEX.14BMU.1326.SM.5RQIH.1	Colon	Training Set	Normal
GTEX.ZAJG.2626.SM.5S2NU.1	Colon	Training Set	Normal
GTEX.WYJK.2226.SM.4ONDJ.1	Colon	Training Set	Normal
GTEX.ZY6K.1226.SM.5GZYL.1	Colon	Training Set	Normal
GTEX.148VJ.2426.SM.5NQ9Y.1	Colon	Training Set	Normal
GTEX.14C39.1626.SM.5S2P4.1	Colon	Training Set	Normal
GTEX.QMRM.1226.SM.447C6.1	Colon	Training Set	Normal
GTEX.11ONC.2026.SM.5HL61.1	Colon	Training Set	Normal
GTEX.11WQK.2526.SM.5CVL8.1	Colon	Training Set	Normal
GTEX.145ME.0826.SM.5O9AF.1	Colon	Training Set	Normal
GTEX.11ILO.2026.SM.5N9CQ.1	Colon	Training Set	Normal
GTEX.13CF2.1826.SM.5N9GK.1	Colon	Training Set	Normal
GTEX.117YW.1826.SM.5PNY5.1	Colon	Training Set	Normal
GTEX.XYKS.2226.SM.4E3IU.1	Colon	Training Set	Normal
GTEX.13OVI.2126.SM.5KM3U.1	Colon	Training Set	Normal
GTEX.ZE9C.2126.SM.4WKGY.1	Colon	Training Set	Normal
GTEX.11EM3.1626.SM.5N9CO.1	Colon	Training Set	Normal
GTEX.12WSL.1826.SM.5LZW9.1	Colon	Training Set	Normal
GTEX.UJHI.1126.SM.4IHLN.1	Colon	Training Set	Normal
GTEX.Y5LM.1526.SM.4VDTA.1	Colon	Training Set	Normal
GTEX.11DXY.2026.SM.5N9CZ.1	Colon	Training Set	Normal
GTEX.11DXZ.1626.SM.5GIDI.1	Colon	Training Set	Normal
GTEX.XBED.1526.SM.4AT5W.1	Colon	Training Set	Normal
GTEX.ZTSS.1226.SM.51MSZ.1	Colon	Training Set	Normal
GTEX.1339X.1726.SM.5P9J9.1	Colon	Training Set	Normal
GTEX.ZVT3.2826.SM.5GU6A.1	Colon	Training Set	Normal
GTEX.14DAR.1526.SM.5RQIX.1	Colon	Training Set	Normal
GTEX.Y3I4.1426.SM.4TT9C.1	Colon	Training Set	Normal
GTEX.XMK1.1726.SM.4B64Z.1	Colon	Training Set	Normal
GTEX.ZDTS.2726.SM.5L3E2.1	Colon	Training Set	Normal
GTEX.13O21.2426.SM.5MR4A.1	Colon	Training Set	Normal
GTEX.WHSB.0926.SM.4M1XJ.1	Colon	Training Set	Normal
GTEX.XUW1.1926.SM.4BOP1.1	Colon	Training Set	Normal
GTEX.ZYFG.1826.SM.5GZWX.1	Colon	Training Set	Normal
GTEX.11ZTT.1626.SM.5EQKR.1	Colon	Training Set	Normal
GTEX.XUJ4.2126.SM.4BOOX.1	Colon	Training Set	Normal
GTEX.11DXZ.1726.SM.5H12M.1	Colon	Training Set	Normal
GTEX.131YS.2926.SM.5EGKI.1	Colon	Training Set	Normal
GTEX.144GN.1126.SM.5LU33.1	Colon	Training Set	Normal
GTEX.OIZH.1426.SM.3NB1O.1	Colon	Training Set	Normal
GTEX.ZVT4.2626.SM.5N9GJ.1	Colon	Training Set	Normal
GTEX.WXYG.1726.SM.4ONCU.1	Colon	Training Set	Normal
GTEX.12C56.0626.SM.5EGGC.1	Colon	Training Set	Normal
GTEX.ZDYS.2326.SM.4WKG6.1	Colon	Training Set	Normal
GTEX.12WSD.2626.SM.5EGJE.1	Colon	Training Set	Normal
GTEX.139D8.2926.SM.5IJBM.1	Colon	Training Set	Normal
GTEX.PWOO.1326.SM.48TCJ.1	Colon	Training Set	Normal
GTEX.131XG.1526.SM.5GCNQ.1	Colon	Training Set	Normal
GTEX.ZT9W.1826.SM.51MQX.1	Colon	Training Set	Normal
GTEX.OHPM.1426.SM.3TW8Y.1	Colon	Training Set	Normal
GTEX.139YR.2126.SM.5KM11.1	Colon	Training Set	Normal
GTEX.11P7K.1826.SM.5HL5A.1	Colon	Training Set	Normal
GTEX.12ZZY.2726.SM.5EQ45.1	Colon	Training Set	Normal
GTEX.ZQUD.1026.SM.4YCEZ.1	Colon	Training Set	Normal
GTEX.X5EB.1126.SM.46MVV.1	Colon	Training Set	Normal
GTEX.WHPG.1626.SM.4M1ZL.1	Colon	Training Set	Normal
GTEX.XAJ8.0426.SM.47JYJ.1	Colon	Training Set	Normal
GTEX.V955.1726.SM.4JBHF.1	Colon	Training Set	Normal
GTEX.13O61.1626.SM.5KM3T.1	Colon	Training Set	Normal
GTEX.11DXX.1926.SM.5EGJK.1	Colon	Training Set	Normal
GTEX.Q2AH.1226.SM.48TZL.1	Colon	Training Set	Normal
GTEX.13OVJ.1726.SM.5IJDZ.1	Colon	Training Set	Normal
GTEX.R55C.1126.SM.48FCJ.1	Colon	Training Set	Normal
GTEX.RU1J.1326.SM.46MUL.1	Colon	Training Set	Normal
GTEX.13U4I.2626.SM.5SI9C.1	Colon	Training Set	Normal
GTEX.YEC3.2026.SM.5CVLQ.1	Colon	Training Set	Normal
GTEX.13N2G.2226.SM.5IJCU.1	Colon	Training Set	Normal
GTEX.QLQ7.1126.SM.4R1KN.1	Colon	Training Set	Normal
GTEX.X3Y1.1726.SM.4PQZL.1	Colon	Training Set	Normal
GTEX.13G51.2126.SM.5IJD9.1	Colon	Training Set	Normal
GTEX.ZPIC.2626.SM.57WE2.1	Colon	Training Set	Normal
GTEX.13VXT.2026.SM.5L3EW.1	Colon	Training Set	Normal
GTEX.ZGAY.2126.SM.4YCFB.1	Colon	Training Set	Normal
GTEX.O5YW.1426.SM.3MJHF.1	Colon	Training Set	Normal
GTEX.ZYFD.2226.SM.5E43P.1	Colon	Training Set	Normal
GTEX.UPIC.1726.SM.4IHKG.1	Colon	Training Set	Normal
GTEX.139T6.1326.SM.5IFFO.1	Colon	Training Set	Normal
GTEX.ZVT2.1926.SM.5GU5T.1	Colon	Training Set	Normal
GTEX.13113.1426.SM.5EGHU.1	Colon	Training Set	Normal
GTEX.111VG.2226.SM.5N9DU.1	Colon	Training Set	Normal
GTEX.ZY6K.1326.SM.5GZWP.1	Colon	Training Set	Normal
GTEX.ZQG8.2426.SM.57WEE.1	Colon	Training Set	Normal
GTEX.XQ8I.2126.SM.4BOOM.1	Colon	Training Set	Normal
GTEX.13FHP.2426.SM.5KLZ5.1	Colon	Training Set	Normal
GTEX.XUW1.1826.SM.4BOQD.1	Colon	Training Set	Normal
GTEX.12WSL.1626.SM.5GCMU.1	Colon	Training Set	Normal
GTEX.13O3O.2526.SM.5L3DR.1	Colon	Training Set	Normal
GTEX.PWCY.1026.SM.48TD4.1	Colon	Training Set	Normal
GTEX.13111.0726.SM.5DUVE.1	Colon	Training Set	Normal
GTEX.13OVI.2026.SM.5J1MU.1	Colon	Training Set	Normal
GTEX.11LCK.2026.SM.5A5MA.1	Colon	Training Set	Normal
GTEX.13D11.0626.SM.5LZYY.1	Colon	Training Set	Normal
GTEX.145LS.2726.SM.5Q5D8.1	Colon	Training Set	Normal
GTEX.S3XE.1126.SM.4AD4N.1	Colon	Training Set	Normal
GTEX.131XE.1026.SM.5EGKE.1	Colon	Training Set	Normal
GTEX.U4B1.1126.SM.4DXV3.1	Colon	Training Set	Normal
GTEX.11ONC.1926.SM.5GU75.1	Colon	Training Set	Normal
GTEX.13QBU.1826.SM.5IJG3.1	Colon	Training Set	Normal
GTEX.S341.1426.SM.4AD6U.1	Colon	Training Set	Normal
GTEX.ZZ64.0826.SM.5E449.1	Colon	Training Set	Normal
GTEX.QDVN.1326.SM.48TZ3.1	Colon	Training Set	Normal
GTEX.YF7O.1726.SM.5IFJ9.1	Colon	Training Set	Normal
GTEX.13FHO.2726.SM.5K7VG.1	Colon	Training Set	Normal
GTEX.11VI4.1526.SM.5EQKC.1	Colon	Training Set	Normal
GTEX.XAJ8.0726.SM.47JY5.1	Colon	Training Set	Normal
GTEX.S4P3.1226.SM.4AD4Y.1	Colon	Training Set	Normal
GTEX.13OW6.2226.SM.5N9FL.1	Colon	Training Set	Normal
GTEX.14C5O.2626.SM.5RQI5.1	Colon	Training Set	Normal
GTEX.NFK9.2026.SM.3LK5K.1	Colon	Training Set	Normal
GTEX.WY7C.1626.SM.4ONC8.1	Colon	Training Set	Normal
GTEX.R53T.1326.SM.48FCQ.1	Colon	Training Set	Normal
GTEX.ZYFG.1926.SM.5GID5.1	Colon	Training Set	Normal
GTEX.X15G.1526.SM.4PQZM.1	Colon	Training Set	Normal
GTEX.T6MO.0826.SM.4DM51.1	Colon	Training Set	Normal
GTEX.12696.1926.SM.5EGJT.1	Colon	Training Set	Normal
GTEX.S4UY.0826.SM.4AD4Z.1	Colon	Training Set	Normal
GTEX.11GS4.1826.SM.5HL4T.1	Colon	Training Set	Normal
GTEX.YJ8A.1726.SM.5P9IQ.1	Colon	Training Set	Normal
GTEX.111YS.1826.SM.5GIEP.1	Colon	Training Set	Normal
GTEX.ZYWO.1626.SM.5E44H.1	Colon	Training Set	Normal
GTEX.VJYA.2126.SM.4KL1O.1	Colon	Training Set	Normal
GTEX.QEL4.1926.SM.4R1JI.1	Colon	Training Set	Normal
GTEX.147JS.2526.SM.5S2Q8.1	Colon	Training Set	Normal
GTEX.ZPCL.1826.SM.57WF1.1	Colon	Training Set	Normal
GTEX.14BMV.2426.SM.5S2PP.1	Colon	Training Set	Normal
GTEX.11EQ9.1426.SM.5987G.1	Colon	Training Set	Normal
GTEX.12ZZZ.2426.SM.5GCNN.1	Colon	Training Set	Normal
GTEX.14E6E.1726.SM.5S2R6.1	Colon	Training Set	Normal
GTEX.PLZ6.0926.SM.3P5ZQ.1	Colon	Training Set	Normal
GTEX.WYJK.2326.SM.4ONDN.1	Colon	Training Set	Normal
GTEX.WHWD.1226.SM.4OOS1.1	Colon	Training Set	Normal
GTEX.YEC3.2426.SM.5IFJR.1	Colon	Training Set	Normal
GTEX.14E6E.1526.SM.5RQIG.1	Colon	Training Set	Normal
GTEX.ZYY3.2226.SM.5E45A.1	Colon	Training Set	Normal
GTEX.PLZ6.0926.SM.3P5ZQ.2	Colon	Training Set	Normal
GTEX.ZVZQ.2626.SM.59HLB.1	Colon	Training Set	Normal
GTEX.ZF28.2526.SM.57WFH.1	Colon	Training Set	Normal
GTEX.13PL7.2426.SM.5J2N3.1	Colon	Training Set	Normal
GTEX.QDVJ.1326.SM.48U1X.1	Colon	Training Set	Normal
GTEX.ZV7C.1526.SM.5NQ72.1	Colon	Training Set	Normal
GTEX.R55G.1226.SM.48FDC.1	Colon	Training Set	Normal
GTEX.132NY.2726.SM.5PNY2.1	Colon	Training Set	Normal
GTEX.12WSM.1426.SM.5GCPA.1	Colon	Training Set	Normal
GTEX.XGQ4.1226.SM.4AT67.1	Colon	Training Set	Normal
GTEX.13X6I.2726.SM.5Q5ET.1	Colon	Training Set	Normal
GTEX.XUJ4.2026.SM.4BOOW.1	Colon	Training Set	Normal
GTEX.V955.1626.SM.4JBHJ.1	Colon	Training Set	Normal
GTEX.1399U.2226.SM.5KLZI.1	Colon	Training Set	Normal
GTEX.OXRK.1726.SM.3NB16.1	Colon	Training Set	Normal
GTEX.12WSJ.1526.SM.5GCNI.1	Colon	Training Set	Normal
GTEX.SNMC.1126.SM.4DM5M.1	Colon	Training Set	Normal
GTEX.1211K.1826.SM.5EGJ2.1	Colon	Training Set	Normal
GTEX.PLZ6.0926.SM.3P5ZQ.3	Colon	Training Set	Normal
GTEX.12BJ1.2026.SM.5FQUH.1	Colon	Training Set	Normal
GTEX.WHWD.1526.SM.4OORV.1	Colon	Training Set	Normal
GTEX.11O72.2226.SM.5PNW2.1	Colon	Training Set	Normal
GTEX.13OW8.2726.SM.5L3FZ.1	Colon	Training Set	Normal
GTEX.QLQW.0426.SM.447A7.1	Colon	Training Set	Normal
GTEX.Q2AI.0926.SM.48U1F.1	Colon	Training Set	Normal
GTEX.144GM.1226.SM.5LU52.1	Colon	Training Set	Normal
GTEX.11TUW.2326.SM.5EQMO.1	Colon	Training Set	Normal
GTEX.Q734.1126.SM.48TZY.1	Colon	Training Set	Normal
GTEX.12WSJ.1426.SM.5GCON.1	Colon	Training Set	Normal
GTEX.YF7O.1626.SM.5IFII.1	Colon	Training Set	Normal
GTEX.145ME.1126.SM.5SIAT.1	Colon	Training Set	Normal
GTEX.13FH7.1626.SM.5J2O9.1	Colon	Training Set	Normal
GTEX.131XE.0826.SM.5HL9W.1	Colon	Training Set	Normal
GTEX.11PRG.2026.SM.5GU5F.1	Colon	Training Set	Normal
GTEX.T5JW.1126.SM.4DM5V.1	Colon	Training Set	Normal
GTEX.13OW5.2826.SM.5KM1G.1	Colon	Training Set	Normal
GTEX.YEC4.1926.SM.5IFHJ.1	Colon	Training Set	Normal
GTEX.ZYVF.2826.SM.5GIDK.1	Colon	Training Set	Normal
GTEX.11I78.1326.SM.5PNY9.1	Colon	Training Set	Normal
GTEX.11NSD.1626.SM.5986U.1	Colon	Training Set	Normal
GTEX.WH7G.1326.SM.4LVMS.1	Colon	Training Set	Normal
GTEX.WFON.1426.SM.4LVMT.1	Colon	Training Set	Normal
GTEX.WY7C.1926.SM.4ONCI.1	Colon	Training Set	Normal
GTEX.13U4I.2426.SM.5LU34.1	Colon	Training Set	Normal
GTEX.13FTW.1826.SM.5IJEN.1	Colon	Training Set	Normal
GTEX.1399R.2226.SM.5P9JB.1	Colon	Training Set	Normal
GTEX.13SLW.2826.SM.5Q5ES.1	Colon	Training Set	Normal
GTEX.147F3.1926.SM.5SIB9.1	Colon	Training Set	Normal
GTEX.12KS4.2326.SM.5EGJB.1	Colon	Training Set	Normal
GTEX.11TT1.1026.SM.5PNW7.1	Colon	Training Set	Normal
GTEX.11TT1.0926.SM.5GU5M.1	Colon	Training Set	Normal
GTEX.ZF2S.1926.SM.4WWAN.1	Colon	Training Set	Normal
GTEX.11P81.1426.SM.5P9JN.1	Colon	Training Set	Normal
GTEX.11P82.1026.SM.5BC5J.1	Colon	Training Set	Normal
GTEX.WYVS.1126.SM.4SOJX.1	Colon	Training Set	Normal
GTEX.145LS.2926.SM.5O99G.1	Colon	Training Set	Normal
GTEX.13O3P.2326.SM.5KM55.1	Colon	Training Set	Normal
GTEX.ZVT2.1726.SM.51MRO.1	Colon	Training Set	Normal
GTEX.RM2N.0926.SM.48FD1.1	Colon	Training Set	Normal
GTEX.117YX.0826.SM.5H11J.1	Colon	Training Set	Normal
GTEX.14A5H.1626.SM.5SIAN.1	Colon	Training Set	Normal
GTEX.ZC5H.2426.SM.4WAZ6.1	Colon	Training Set	Normal
GTEX.ZLV1.1226.SM.4WWBX.1	Colon	Training Set	Normal
GTEX.12ZZX.2726.SM.5N9FT.1	Colon	Training Set	Normal
GTEX.R55D.1826.SM.48FEF.1	Colon	Training Set	Normal
GTEX.O5YT.1426.SM.3MJHC.1	Colon	Training Set	Normal
GTEX.139TS.2226.SM.5J2N1.1	Colon	Training Set	Normal
GTEX.ZXES.1726.SM.5E43G.1	Colon	Training Set	Normal
GTEX.XV7Q.2226.SM.4BRVY.1	Colon	Training Set	Normal
GTEX.XXEK.1926.SM.4BRVD.1	Colon	Training Set	Normal
GTEX.13VXT.2426.SM.5LU46.1	Colon	Training Set	Normal
GTEX.TML8.1326.SM.4DXTO.1	Colon	Training Set	Normal
GTEX.11ZTS.1526.SM.5N9G7.1	Colon	Training Set	Normal
GTEX.QCQG.1626.SM.48U26.1	Colon	Training Set	Normal
GTEX.YECK.2826.SM.5IFHF.1	Colon	Training Set	Normal
GTEX.145LT.0926.SM.5LU9C.1	Colon	Training Set	Normal
GTEX.XXEK.1826.SM.4BRVC.1	Colon	Training Set	Normal
GTEX.W5WG.2426.SM.4LMI6.1	Colon	Training Set	Normal
GTEX.111CU.1226.SM.5EGIN.1	Colon	Training Set	Normal
GTEX.1477Z.2126.SM.5Q5CM.1	Colon	Training Set	Normal
GTEX.Z93S.2626.SM.57WBX.1	Colon	Training Set	Normal
GTEX.13X6K.2726.SM.5O9DG.1	Colon	Training Set	Normal
GTEX.PLZ5.1126.SM.3P613.1	Colon	Training Set	Normal
GTEX.11EI6.2626.SM.5PNVT.1	Colon	Training Set	Normal
GTEX.ZV6S.1126.SM.57WE9.1	Colon	Training Set	Normal
GTEX.ZVP2.1526.SM.5NQ82.1	Colon	Training Set	Normal
GTEX.ZLV1.1326.SM.4WWER.1	Colon	Training Set	Normal
GTEX.Y9LG.1526.SM.4WWDR.1	Colon	Training Set	Normal
GTEX.13O1R.2426.SM.5KLZZ.1	Colon	Training Set	Normal
GTEX.XQ8I.2326.SM.4BOQC.1	Colon	Training Set	Normal
GTEX.PLZ5.1126.SM.3P613.2	Colon	Training Set	Normal
GTEX.TKQ1.0626.SM.4DXTS.1	Colon	Training Set	Normal
GTEX.U3ZH.1326.SM.4DXSF.1	Colon	Training Set	Normal
GTEX.11ZU8.1126.SM.5EQ5K.1	Colon	Training Set	Normal
GTEX.13OVG.1426.SM.5K7VP.1	Colon	Training Set	Normal
GTEX.13OW6.2126.SM.5N9GL.1	Colon	Training Set	Normal
GTEX.XBEW.1926.SM.4SOJO.1	Colon	Training Set	Normal
GTEX.ZA64.1426.SM.5CVMC.1	Colon	Training Set	Normal
GTEX.Y8E4.2426.SM.4WWDN.1	Colon	Training Set	Normal
GTEX.ZTSS.1126.SM.5985O.1	Colon	Training Set	Normal
GTEX.13PL7.2526.SM.5IFGR.1	Colon	Training Set	Normal
GTEX.WQUQ.2526.SM.4MVNO.1	Colon	Training Set	Normal
GTEX.11EQ8.2626.SM.5N9BO.1	Colon	Training Set	Normal
GTEX.ZEX8.1926.SM.4WKFR.1	Colon	Training Set	Normal
GTEX.U3ZM.1126.SM.4DXUB.1	Colon	Training Set	Normal
GTEX.ZZ64.0726.SM.5GZX4.1	Colon	Training Set	Normal
GTEX.RWS6.1826.SM.47JXX.1	Colon	Training Set	Normal
GTEX.Y5V6.1626.SM.4VDT2.1	Colon	Training Set	Normal
GTEX.148VJ.2626.SM.5QGPI.1	Colon	Training Set	Normal
GTEX.ZYT6.2826.SM.5GICX.1	Colon	Training Set	Normal
GTEX.11P81.1126.SM.5GU5G.1	Colon	Training Set	Normal
GTEX.139T6.1426.SM.5P9J7.1	Colon	Training Set	Normal
GTEX.WQUQ.2626.SM.4MVNP.1	Colon	Training Set	Normal
GTEX.YEC3.2026.SM.4WWFL.1	Colon	Training Set	Normal
GTEX.146FH.2426.SM.5Q5EW.1	Colon	Training Set	Normal
GTEX.1399R.2126.SM.5K7WZ.1	Colon	Training Set	Normal
GTEX.VJYA.2026.SM.4KL1K.1	Colon	Training Set	Normal
GTEX.145MO.2426.SM.5NQ9W.1	Colon	Training Set	Normal
GTEX.1399U.1926.SM.5IFH7.1	Colon	Training Set	Normal
GTEX.XBED.1726.SM.47JYO.1	Colon	Training Set	Normal
GTEX.S7SF.1926.SM.4AT5B.1	Colon	Training Set	Normal
GTEX.SE5C.1526.SM.4BRWU.1	Colon	Training Set	Normal
GTEX.Y9LG.1326.SM.4VBQB.1	Colon	Training Set	Normal
GTEX.WYVS.1826.SM.4OND6.1	Colon	Training Set	Normal
GTEX.14A5I.2426.SM.5Q5CP.1	Colon	Training Set	Normal
GTEX.1399S.1926.SM.5J2M5.1	Colon	Training Set	Normal
GTEX.133LE.1526.SM.5IFEN.1	Colon	Training Set	Normal
GTEX.X5EB.0926.SM.46MVT.1	Colon	Training Set	Normal
GTEX.14E6C.2226.SM.5QGQG.1	Colon	Training Set	Normal
GTEX.14ICL.1226.SM.5S2RD.1	Colon	Training Set	Normal
GTEX.X4EO.2726.SM.4E3HS.1	Colon	Training Set	Normal
GTEX.11P82.1226.SM.5HL5P.1	Colon	Training Set	Normal
GTEX.12BJ1.2126.SM.5BC5O.1	Colon	Training Set	Normal
GTEX.13111.1926.SM.5GCOL.1	Colon	Training Set	Normal
GTEX.13PVQ.2726.SM.5L3H7.1	Colon	Training Set	Normal
GTEX.13FH7.1526.SM.5J2N6.1	Colon	Training Set	Normal
GTEX.WOFM.1926.SM.4OOSP.1	Colon	Training Set	Normal
GTEX.132AR.2826.SM.5IJFV.1	Colon	Training Set	Normal
GTEX.ZAB5.1426.SM.5HL9D.1	Colon	Training Set	Normal
GTEX.13O61.1526.SM.5KM3P.1	Colon	Training Set	Normal
GTEX.11VI4.1426.SM.5GU6O.1	Colon	Training Set	Normal
GTEX.XUZC.1326.SM.4BRV2.1	Colon	Training Set	Normal
GTEX.13FTW.2126.SM.5K7YG.1	Colon	Training Set	Normal
GTEX.ZP4G.1526.SM.57WE5.1	Colon	Training Set	Normal
GTEX.ZG7Y.1826.SM.4WWD3.1	Colon	Training Set	Normal
GTEX.11TUW.2026.SM.5EQL8.1	Colon	Training Set	Normal
GTEX.13W3W.2226.SM.5LU4M.1	Colon	Training Set	Normal
GTEX.ZTTD.2626.SM.57WEX.1	Colon	Training Set	Normal
GTEX.P4QT.1426.SM.3NMCX.1	Colon	Training Set	Normal
GTEX.ZAB4.2426.SM.5HL8A.1	Colon	Training Set	Normal
GTEX.13CF3.1426.SM.5K7YY.1	Colon	Training Set	Normal
GTEX.QV31.0826.SM.4R1KR.1	Colon	Training Set	Normal
GTEX.11EQ9.1526.SM.5PNY7.1	Colon	Training Set	Normal
GTEX.Z93S.2426.SM.5HL8N.1	Colon	Training Set	Normal
GTEX.12ZZW.2426.SM.5DUWE.1	Colon	Training Set	Normal
GTEX.1211K.1726.SM.5FQUJ.1	Colon	Training Set	Normal
GTEX.ZYFC.2626.SM.5NQ6S.1	Colon	Training Set	Normal
GTEX.ZPCL.1626.SM.57WGC.1	Colon	Training Set	Normal
GTEX.ZE7O.2626.SM.51MSS.1	Colon	Training Set	Normal
GTEX.11WQK.2126.SM.5EQME.1	Colon	Training Set	Normal
GTEX.13OVJ.1826.SM.5KM2D.1	Colon	Training Set	Normal
GTEX.Y8LW.1226.SM.4WWDP.1	Colon	Training Set	Normal
GTEX.WH7G.1426.SM.4LVMU.1	Colon	Training Set	Normal
GTEX.1122O.1526.SM.5N9CL.1	Colon	Training Set	Normal
GTEX.U3ZN.2126.SM.4DXU1.1	Colon	Training Set	Normal
GTEX.139UW.2326.SM.5KM1Y.1	Colon	Training Set	Normal
GTEX.ZXES.1626.SM.5NQ7L.1	Colon	Training Set	Normal
GTEX.145MO.2626.SM.5QGPD.1	Colon	Training Set	Normal
GTEX.PWN1.1426.SM.48TDF.1	Colon	Training Set	Normal
GTEX.ZPU1.1726.SM.4WWFV.1	Colon	Training Set	Normal
GTEX.ZF29.1726.SM.4WKFV.1	Colon	Training Set	Normal
GTEX.147JS.2626.SM.5S2UX.1	Colon	Training Set	Normal
GTEX.14C38.2626.SM.5RQI4.1	Colon	Training Set	Normal
GTEX.12KS4.2426.SM.5LU8P.1	Colon	Training Set	Normal
GTEX.ZF2S.1826.SM.4WKFF.1	Colon	Training Set	Normal
GTEX.XUZC.1526.SM.4BRV4.1	Colon	Training Set	Normal
GTEX.145MH.2726.SM.5QGQ6.1	Colon	Training Set	Normal
GTEX.139TS.1926.SM.5IJFO.1	Colon	Training Set	Normal
GTEX.WFG7.1526.SM.4LVMG.1	Colon	Training Set	Normal
GTEX.PLZ5.1126.SM.3P613.3	Colon	Training Set	Normal
GTEX.Y3IK.1826.SM.4WWDS.1	Colon	Training Set	Normal
GTEX.Y8LW.1126.SM.4VDS4.1	Colon	Training Set	Normal
GTEX.Y5LM.1426.SM.5RQJL.1	Colon	Training Set	Normal
GTEX.Y114.1626.SM.4TT7I.1	Colon	Training Set	Normal
GTEX.13QBU.2026.SM.5KLZB.1	Colon	Training Set	Normal
GTEX.ZLFU.1426.SM.4WWEU.1	Colon	Training Set	Normal
GTEX.XV7Q.2126.SM.4BRVX.1	Colon	Training Set	Normal
GTEX.117XS.2226.SM.5GIE1.1	Colon	Training Set	Normal
GTEX.YJ8O.1426.SM.5PNV9.1	Colon	Training Set	Normal
GTEX.OXRL.1426.SM.3NM9E.1	Colon	Training Set	Normal
GTEX.XPVG.1826.SM.4B64X.1	Colon	Training Set	Normal
GTEX.131XG.1826.SM.5LZV4.1	Colon	Training Set	Normal
GTEX.P4PP.1426.SM.3NM9L.1	Colon	Training Set	Normal
GTEX.11ZVC.2126.SM.5EGJ1.1	Colon	Training Set	Normal
GTEX.X15G.1326.SM.4PQZJ.1	Colon	Training Set	Normal
GTEX.ZAB4.2226.SM.5HL97.1	Colon	Training Set	Normal
GTEX.1128S.1626.SM.5H12O.1	Colon	Training Set	Normal
GTEX.111YS.1626.SM.5GZZ9.1	Colon	Training Set	Normal
GTEX.ZV6S.1226.SM.59HLH.1	Colon	Training Set	Normal
GTEX.WEY5.1426.SM.4LMJ3.1	Colon	Training Set	Normal
GTEX.Y3I4.1126.SM.4TT7Y.1	Colon	Training Set	Normal
GTEX.WFG7.1626.SM.4LVMF.1	Colon	Training Set	Normal
GTEX.WFON.1326.SM.4LVMN.1	Colon	Training Set	Normal
GTEX.147GR.2826.SM.5RQK8.1	Colon	Training Set	Normal
GTEX.11EMC.1426.SM.5N9E4.1	Colon	Training Set	Normal
GTEX.1RAZA.1726.SM.DPS13.1	Colon	Training Set	Normal
GTEX.14PHX.1526.SM.68717.1	Colon	Training Set	Normal
GTEX.ZG7Y.2126.SM.DO117.1	Colon	Training Set	Normal
GTEX.YEC3.2426.SM.DO11A.1	Colon	Training Set	Normal
GTEX.14JIY.3326.SM.6871E.1	Colon	Training Set	Normal
GTEX.ZLWG.1826.SM.DO11I.1	Colon	Training Set	Normal
GTEX.14PK6.1726.SM.6871J.1	Colon	Training Set	Normal
GTEX.ZLV1.1326.SM.DO11Q.1	Colon	Training Set	Normal
GTEX.14PN3.1926.SM.6EU1Y.1	Colon	Training Set	Normal
GTEX.1H1E6.1826.SM.A9G21.1	Colon	Training Set	Normal
GTEX.1HFI7.1726.SM.A9G22.1	Colon	Training Set	Normal
GTEX.15CHQ.2526.SM.6EU24.1	Colon	Training Set	Normal
GTEX.1HCVE.2526.SM.A9G2G.1	Colon	Training Set	Normal
GTEX.15DCZ.2826.SM.6EU2J.1	Colon	Training Set	Normal
GTEX.1IOXB.2626.SM.CJI2N.1	Colon	Training Set	Normal
GTEX.1F5PL.2126.SM.7PC2O.1	Colon	Training Set	Normal
GTEX.PSDG.1826.SM.EAZ2S.1	Colon	Training Set	Normal
GTEX.1IKOE.2026.SM.AHZ31.1	Colon	Training Set	Normal
GTEX.1HB9E.2526.SM.D4P35.1	Colon	Training Set	Normal
GTEX.1HCU7.2726.SM.A9G3D.1	Colon	Training Set	Normal
GTEX.1K9T9.2826.SM.D4P3F.1	Colon	Training Set	Normal
GTEX.1IDJC.1326.SM.CL53H.1	Colon	Training Set	Normal
GTEX.1QPFJ.2426.SM.EVR3L.1	Colon	Training Set	Normal
GTEX.1J1OQ.2726.SM.AHZ3R.1	Colon	Training Set	Normal
GTEX.1J8Q3.2426.SM.CL53S.1	Colon	Training Set	Normal
GTEX.1IDJU.1926.SM.CL53W.1	Colon	Training Set	Normal
GTEX.1RQEC.2626.SM.EVR3Z.1	Colon	Training Set	Normal
GTEX.1JK1U.1526.SM.AHZ46.1	Colon	Training Set	Normal
GTEX.1LGRB.2026.SM.COH47.1	Colon	Training Set	Normal
GTEX.S4Z8.1526.SM.D4P48.1	Colon	Training Set	Normal
GTEX.1IDJH.2826.SM.CJI49.1	Colon	Training Set	Normal
GTEX.1QCLZ.2026.SM.EAZ4A.1	Colon	Training Set	Normal
GTEX.1J8JJ.2426.SM.D4P4A.1	Colon	Training Set	Normal
GTEX.1QCLY.2026.SM.EVR4C.1	Colon	Training Set	Normal
GTEX.OXRO.0726.SM.E9U4C.1	Colon	Training Set	Normal
GTEX.1QP67.1326.SM.EAZ4D.1	Colon	Training Set	Normal
GTEX.1R9PO.2026.SM.E9J4N.1	Colon	Training Set	Normal
GTEX.1R9JW.2026.SM.EAZ4O.1	Colon	Training Set	Normal
GTEX.1MGNQ.2026.SM.EAZ51.1	Colon	Training Set	Normal
GTEX.1RDX4.1826.SM.EVR54.1	Colon	Training Set	Normal
GTEX.18QFQ.1526.SM.72D57.1	Colon	Training Set	Normal
GTEX.S4Z8.1526.SM.4AD5B.1	Colon	Training Set	Normal
GTEX.1LH75.2126.SM.EVR5F.1	Colon	Training Set	Normal
GTEX.SNOS.1226.SM.4DM5H.1	Colon	Training Set	Normal
GTEX.1LG7Y.2226.SM.E9U5K.1	Colon	Training Set	Normal
GTEX.1AMEY.1826.SM.72D5L.1	Colon	Training Set	Normal
GTEX.1J1R8.1426.SM.CL55O.1	Colon	Training Set	Normal
GTEX.1A3MW.2526.SM.72D5P.1	Colon	Training Set	Normal
GTEX.1A3MV.1026.SM.72D5U.1	Colon	Training Set	Normal
GTEX.ZDTT.1926.SM.5HL5W.1	Colon	Training Set	Normal
GTEX.1NSGN.2326.SM.E9U5X.1	Colon	Training Set	Normal
GTEX.18A6Q.2226.SM.7LG61.1	Colon	Training Set	Normal
GTEX.1PIGE.1426.SM.E9U61.1	Colon	Training Set	Normal
GTEX.1R7EU.1926.SM.E9U62.1	Colon	Training Set	Normal
GTEX.15UF6.2626.SM.6M466.1	Colon	Training Set	Normal
GTEX.18A66.2626.SM.72D67.1	Colon	Training Set	Normal
GTEX.17GQL.1626.SM.7LG69.1	Colon	Training Set	Normal
GTEX.15RJE.2226.SM.6M46A.1	Colon	Training Set	Normal
GTEX.17KNJ.1726.SM.7LG6A.1	Colon	Training Set	Normal
GTEX.1S5VW.2926.SM.E9U6H.1	Colon	Training Set	Normal
GTEX.1PFEY.1426.SM.E9U6U.1	Colon	Training Set	Normal
GTEX.18A7B.2026.SM.72D71.1	Colon	Training Set	Normal
GTEX.1C64N.2226.SM.7SB7C.1	Colon	Training Set	Normal
GTEX.15SHU.2526.SM.6M47D.1	Colon	Training Set	Normal
GTEX.1I1GT.1926.SM.ARU7D.1	Colon	Training Set	Normal
GTEX.1I1GR.2226.SM.ARL7F.1	Colon	Training Set	Normal
GTEX.15TU5.2726.SM.6M47I.1	Colon	Training Set	Normal
GTEX.16NFA.1326.SM.6M47K.1	Colon	Training Set	Normal
GTEX.16MTA.1626.SM.6M47N.1	Colon	Training Set	Normal
GTEX.1PPH8.2026.SM.DTX7P.1	Colon	Training Set	Normal
GTEX.16XZZ.2626.SM.6M47S.1	Colon	Training Set	Normal
GTEX.16NPV.2626.SM.6M484.1	Colon	Training Set	Normal
GTEX.1HCUA.1826.SM.A8N87.1	Colon	Training Set	Normal
GTEX.1J1OQ.2826.SM.D3L88.1	Colon	Training Set	Normal
GTEX.1QP28.2226.SM.DTX8C.1	Colon	Training Set	Normal
GTEX.QEL4.1926.SM.D3L8D.1	Colon	Training Set	Normal
GTEX.1JJ6O.2426.SM.ARU8J.1	Colon	Training Set	Normal
GTEX.18A7A.2226.SM.7LT8K.1	Colon	Training Set	Normal
GTEX.1JJE9.2526.SM.ARU8K.1	Colon	Training Set	Normal
GTEX.1N2EF.1926.SM.DTX8M.1	Colon	Training Set	Normal
GTEX.1NV5F.2226.SM.DTX8O.1	Colon	Training Set	Normal
GTEX.1LGOU.1726.SM.D3L8P.1	Colon	Training Set	Normal
GTEX.18D9A.1326.SM.7LT8P.1	Colon	Training Set	Normal
GTEX.15RIE.1826.SM.6M48P.1	Colon	Training Set	Normal
GTEX.1HSMP.2326.SM.D3L8R.1	Colon	Training Set	Normal
GTEX.1JJE9.2426.SM.D3L8T.1	Colon	Training Set	Normal
GTEX.1PBJJ.2026.SM.DTX8U.1	Colon	Training Set	Normal
GTEX.1J8Q3.2326.SM.A8N8Y.1	Colon	Training Set	Normal
GTEX.1JMPZ.2626.SM.ARU8Z.1	Colon	Training Set	Normal
GTEX.1OJC3.1826.SM.DTX93.1	Colon	Training Set	Normal
GTEX.1JN76.1326.SM.ARU94.1	Colon	Training Set	Normal
GTEX.14PJ4.1826.SM.5YY97.1	Colon	Training Set	Normal
GTEX.1JN6P.2126.SM.ARL98.1	Colon	Training Set	Normal
GTEX.1H1DE.1526.SM.ARL9B.1	Colon	Training Set	Normal
GTEX.1J8QM.1426.SM.A8N9B.1	Colon	Training Set	Normal
GTEX.1R9K5.2226.SM.DTX9G.1	Colon	Training Set	Normal
GTEX.1PPGY.2826.SM.DTX9H.1	Colon	Training Set	Normal
GTEX.18465.2726.SM.7LT9I.1	Colon	Training Set	Normal
GTEX.1IDJI.2326.SM.A8N9I.1	Colon	Training Set	Normal
GTEX.1S3DN.1826.SM.EV79K.1	Colon	Training Set	Normal
GTEX.1AMFI.1726.SM.7189L.1	Colon	Training Set	Normal
GTEX.1R7EU.1826.SM.DTX9L.1	Colon	Training Set	Normal
GTEX.17KNJ.1826.SM.7LT9N.1	Colon	Training Set	Normal
GTEX.1QP9N.0826.SM.DTX9O.1	Colon	Training Set	Normal
GTEX.1H11D.2326.SM.A8N9O.1	Colon	Training Set	Normal
GTEX.1HBPN.1826.SM.A8N9R.1	Colon	Training Set	Normal
GTEX.1L5NE.1926.SM.D3L9R.1	Colon	Training Set	Normal
GTEX.1RAZQ.2126.SM.DTX9V.1	Colon	Training Set	Normal
GTEX.1LBAC.1726.SM.D3L9W.1	Colon	Training Set	Normal
GTEX.1LVAM.1626.SM.EV79Y.1	Colon	Training Set	Normal
GTEX.18A67.2226.SM.7LT9Z.1	Colon	Training Set	Normal
GTEX.1MA7W.0626.SM.EV79Z.1	Colon	Training Set	Normal
GTEX.13RTJ.1926.SM.5YYA2.1	Colon	Training Set	Normal
GTEX.14ICK.1026.SM.6AJA4.1	Colon	Training Set	Normal
GTEX.14PHX.1126.SM.5YYA5.1	Colon	Training Set	Normal
GTEX.1KANC.0926.SM.D3LA9.1	Colon	Training Set	Normal
GTEX.17GQL.1526.SM.7LTAC.1	Colon	Training Set	Normal
GTEX.1MGNQ.2126.SM.EV7AC.1	Colon	Training Set	Normal
GTEX.1AYCT.1926.SM.793AE.1	Colon	Training Set	Normal
GTEX.1KXAM.1926.SM.D3LAG.1	Colon	Training Set	Normal
GTEX.16NGA.0926.SM.718AG.1	Colon	Training Set	Normal
GTEX.1LGOU.1626.SM.D3LAK.1	Colon	Training Set	Normal
GTEX.SJXC.2226.SM.EVYAK.1	Colon	Training Set	Normal
GTEX.17MF6.2426.SM.7LTAM.1	Colon	Training Set	Normal
GTEX.1AX8Y.1826.SM.731AU.1	Colon	Training Set	Normal
GTEX.1MJK3.0926.SM.EV7AY.1	Colon	Training Set	Normal
GTEX.Y8E4.2326.SM.EAZAZ.1	Colon	Training Set	Normal
GTEX.1A3MX.2326.SM.718B4.1	Colon	Training Set	Normal
GTEX.YFCO.1526.SM.5YYB8.1	Colon	Training Set	Normal
GTEX.1S83E.1626.SM.EV7B9.1	Colon	Training Set	Normal
GTEX.14JG6.1626.SM.5YYBC.1	Colon	Training Set	Normal
GTEX.18D9B.2526.SM.718BN.1	Colon	Training Set	Normal
GTEX.183WM.2526.SM.731BP.1	Colon	Training Set	Normal
GTEX.1A3MV.1126.SM.718BS.1	Colon	Training Set	Normal
GTEX.1RMOY.1626.SM.EVYC8.1	Colon	Training Set	Normal
GTEX.18QFQ.1726.SM.731C9.1	Colon	Training Set	Normal
GTEX.1RMOY.1726.SM.EVYC9.1	Colon	Training Set	Normal
GTEX.14BIN.2426.SM.5TDCF.1	Colon	Training Set	Normal
GTEX.S4Z8.1526.SM.731D2.1	Colon	Training Set	Normal
GTEX.13X6H.1926.SM.7EWD3.1	Colon	Training Set	Normal
GTEX.14AS3.1026.SM.5TDD7.1	Colon	Training Set	Normal
GTEX.144GL.2526.SM.5TDDL.1	Colon	Training Set	Normal
GTEX.1339X.1626.SM.5IJDN.1	Colon	Training Set	Normal
GTEX.16XZZ.2726.SM.7EWDO.1	Colon	Training Set	Normal
GTEX.17HGU.2426.SM.7EWDP.1	Colon	Training Set	Normal
GTEX.14E1K.1826.SM.793DT.1	Colon	Training Set	Normal
GTEX.17JCI.2626.SM.7EWE6.1	Colon	Training Set	Normal
GTEX.14BMU.1526.SM.5TDE6.1	Colon	Training Set	Normal
GTEX.1OKEX.1226.SM.DTXEC.1	Colon	Training Set	Normal
GTEX.1B8KE.1926.SM.731EE.1	Colon	Training Set	Normal
GTEX.1AYCT.1826.SM.731EG.1	Colon	Training Set	Normal
GTEX.1LB8K.2526.SM.DIPEQ.1	Colon	Training Set	Normal
GTEX.1LG7Y.2126.SM.DIPER.1	Colon	Training Set	Normal
GTEX.1LKK1.2426.SM.DIPES.1	Colon	Training Set	Normal
GTEX.1P4AB.2626.SM.DTXEU.1	Colon	Training Set	Normal
GTEX.1MCC2.1626.SM.DIPEW.1	Colon	Training Set	Normal
GTEX.17EUY.1826.SM.7DUEZ.1	Colon	Training Set	Normal
GTEX.1C4CL.1626.SM.7DUF3.1	Colon	Training Set	Normal
GTEX.1LG7Z.1326.SM.DIPF3.1	Colon	Training Set	Normal
GTEX.1QP2A.2226.SM.DTXF6.1	Colon	Training Set	Normal
GTEX.1PIGE.1526.SM.DTXFC.1	Colon	Training Set	Normal
GTEX.17HG3.1126.SM.7DUFC.1	Colon	Training Set	Normal
GTEX.15DCE.2026.SM.7KUFE.1	Colon	Training Set	Normal
GTEX.15G1A.1926.SM.7KUFF.1	Colon	Training Set	Normal
GTEX.15ER7.2926.SM.7KUFK.1	Colon	Training Set	Normal
GTEX.1CB4F.1926.SM.7MKFN.1	Colon	Training Set	Normal
GTEX.1C475.1626.SM.731FP.1	Colon	Training Set	Normal
GTEX.1AYD5.1726.SM.7RHFW.1	Colon	Training Set	Normal
GTEX.1B8KE.1526.SM.7DUG2.1	Colon	Training Set	Normal
GTEX.1B8KZ.1326.SM.7DUG6.1	Colon	Training Set	Normal
GTEX.1JKYN.2326.SM.CGQG7.1	Colon	Training Set	Normal
GTEX.15DYW.2426.SM.7KUG8.1	Colon	Training Set	Normal
GTEX.13X6J.2826.SM.7EPGA.1	Colon	Training Set	Normal
GTEX.1K2DA.1626.SM.CGQGB.1	Colon	Training Set	Normal
GTEX.15ETS.2326.SM.7KUGC.1	Colon	Training Set	Normal
GTEX.1B996.2726.SM.7DUGG.1	Colon	Training Set	Normal
GTEX.1K2DA.2026.SM.CGQGK.1	Colon	Training Set	Normal
GTEX.15CHR.1426.SM.7DUGV.1	Colon	Training Set	Normal
GTEX.1GF9X.1426.SM.7RHGX.1	Colon	Training Set	Normal
GTEX.1H11D.2626.SM.9JGH4.1	Colon	Training Set	Normal
GTEX.1CAMS.2526.SM.7EPH7.1	Colon	Training Set	Normal
GTEX.1C2JI.1626.SM.7EPHC.1	Colon	Training Set	Normal
GTEX.14PJ4.1926.SM.6LLHG.1	Colon	Training Set	Normal
GTEX.OOBJ.1426.SM.E6CHH.1	Colon	Training Set	Normal
GTEX.1J8QM.1226.SM.CY8HI.1	Colon	Training Set	Normal
GTEX.1JJEA.2526.SM.CY8HJ.1	Colon	Training Set	Normal
GTEX.OXRN.2026.SM.E6CHK.1	Colon	Training Set	Normal
GTEX.1JMQJ.2626.SM.CY8HQ.1	Colon	Training Set	Normal
GTEX.1F5PK.1726.SM.7RHHW.1	Colon	Training Set	Normal
GTEX.1JMLX.2526.SM.CY8HX.1	Colon	Training Set	Normal
GTEX.1GMR2.1726.SM.9JGI2.1	Colon	Training Set	Normal
GTEX.1JN1M.2626.SM.CY8I3.1	Colon	Training Set	Normal
GTEX.1KXAM.2126.SM.CY8I9.1	Colon	Training Set	Normal
GTEX.OHPN.2026.SM.E9TIA.1	Colon	Training Set	Normal
GTEX.1F75W.2126.SM.7RHIA.1	Colon	Training Set	Normal
GTEX.1KANA.1726.SM.CY8IG.1	Colon	Training Set	Normal
GTEX.1LSNM.1426.SM.E6CIH.1	Colon	Training Set	Normal
GTEX.14PJ5.0926.SM.6LLIK.1	Colon	Training Set	Normal
GTEX.1S82P.2026.SM.E9TIQ.1	Colon	Training Set	Normal
GTEX.1H1ZS.2626.SM.9QEIX.1	Colon	Training Set	Normal
GTEX.1N2DV.1826.SM.E6CJ5.1	Colon	Training Set	Normal
GTEX.16Z82.2226.SM.6LPJ7.1	Colon	Training Set	Normal
GTEX.1LSVX.2026.SM.E9TJD.1	Colon	Training Set	Normal
GTEX.1LVAO.2826.SM.E9TJH.1	Colon	Training Set	Normal
GTEX.1RDX4.1926.SM.E6CJJ.1	Colon	Training Set	Normal
GTEX.144GM.1126.SM.79OJK.1	Colon	Training Set	Normal
GTEX.1LSVX.1726.SM.DHXJP.1	Colon	Training Set	Normal
GTEX.15FZZ.1826.SM.6LLJP.1	Colon	Training Set	Normal
GTEX.1S5ZA.1426.SM.E6CJQ.1	Colon	Training Set	Normal
GTEX.178AV.1326.SM.6LPJX.1	Colon	Training Set	Normal
GTEX.1LSNL.1626.SM.E9TJY.1	Colon	Training Set	Normal
GTEX.17EUY.1726.SM.79OK4.1	Colon	Training Set	Normal
GTEX.1KANB.1526.SM.CXZK4.1	Colon	Training Set	Normal
GTEX.1K9T9.2926.SM.E9TKD.1	Colon	Training Set	Normal
GTEX.1RAZR.2026.SM.E9TKE.1	Colon	Training Set	Normal
GTEX.17HHE.1826.SM.79OKE.1	Colon	Training Set	Normal
GTEX.1KANA.1926.SM.DHXKF.1	Colon	Training Set	Normal
GTEX.1RLM8.1726.SM.E9TKF.1	Colon	Training Set	Normal
GTEX.15G19.2726.SM.6LPKG.1	Colon	Training Set	Normal
GTEX.1S82U.0726.SM.E9TKI.1	Colon	Training Set	Normal
GTEX.15EO6.2326.SM.6LPKK.1	Colon	Training Set	Normal
GTEX.15TU5.2626.SM.7KUKK.1	Colon	Training Set	Normal
GTEX.17HGU.2626.SM.79OKN.1	Colon	Training Set	Normal
GTEX.15RIF.1326.SM.6LPKO.1	Colon	Training Set	Normal
GTEX.15G1A.1826.SM.7KUKO.1	Colon	Training Set	Normal
GTEX.1HSMO.2526.SM.A9SKP.1	Colon	Training Set	Normal
GTEX.1LVAM.1726.SM.DHXKQ.1	Colon	Training Set	Normal
GTEX.15RIF.1426.SM.7KUKQ.1	Colon	Training Set	Normal
GTEX.1L5NE.2026.SM.CXZKR.1	Colon	Training Set	Normal
GTEX.1LBAC.1626.SM.CXZKV.1	Colon	Training Set	Normal
GTEX.1HCU6.2726.SM.A9SKV.1	Colon	Training Set	Normal
GTEX.15UF7.1326.SM.7KUKV.1	Colon	Training Set	Normal
GTEX.U412.1726.SM.EZ6KX.1	Colon	Training Set	Normal
GTEX.R45C.2126.SM.EZ6KZ.1	Colon	Training Set	Normal
GTEX.1I1GP.2826.SM.A9SKZ.1	Colon	Training Set	Normal
GTEX.OIZF.1426.SM.2HML2.1	Colon	Training Set	Normal
GTEX.1HKZK.2126.SM.A9SL3.1	Colon	Training Set	Normal
GTEX.15RJ7.1726.SM.6PAL3.1	Colon	Training Set	Normal
GTEX.1I1CD.2826.SM.A9SL4.1	Colon	Training Set	Normal
GTEX.1HSGN.2226.SM.A9SL6.1	Colon	Training Set	Normal
GTEX.1HSKV.2326.SM.A9SL9.1	Colon	Training Set	Normal
GTEX.WVJS.2426.SM.EZ6LI.1	Colon	Training Set	Normal
GTEX.16MT8.2726.SM.7IGLJ.1	Colon	Training Set	Normal
GTEX.1IDJU.2026.SM.A9SLM.1	Colon	Training Set	Normal
GTEX.183FY.1426.SM.7DHLM.1	Colon	Training Set	Normal
GTEX.17HHE.1626.SM.7DHLN.1	Colon	Training Set	Normal
GTEX.YECK.2626.101825.SM.EZ6LP.1	Colon	Training Set	Normal
GTEX.16BQI.2026.SM.7KULQ.1	Colon	Training Set	Normal
GTEX.1CB4F.2026.SM.79OLU.1	Colon	Training Set	Normal
GTEX.15UF6.2726.SM.7KULY.1	Colon	Training Set	Normal
GTEX.13OVK.0826.SM.7KULZ.1	Colon	Training Set	Normal
GTEX.1C475.1526.SM.7DHM3.1	Colon	Training Set	Normal
GTEX.X4EO.2526.SM.EWRM8.1	Colon	Training Set	Normal
GTEX.17F9E.1826.SM.7IGMC.1	Colon	Training Set	Normal
GTEX.1HSMQ.2526.SM.A9SMK.1	Colon	Training Set	Normal
GTEX.WHSE.2726.SM.EZ6ML.1	Colon	Training Set	Normal
GTEX.1PIEJ.1826.SM.EWRMN.1	Colon	Training Set	Normal
GTEX.14E1K.1626.SM.664MO.1	Colon	Training Set	Normal
GTEX.1BAJH.2326.SM.7IGMO.1	Colon	Training Set	Normal
GTEX.1PWST.2426.SM.EWRMP.1	Colon	Training Set	Normal
GTEX.15SB6.1226.SM.7KUMP.1	Colon	Training Set	Normal
GTEX.1C6VQ.2626.SM.7IGMQ.1	Colon	Training Set	Normal
GTEX.16Z82.2426.SM.7KUMS.1	Colon	Training Set	Normal
GTEX.1B932.2126.SM.7IGMU.1	Colon	Training Set	Normal
GTEX.15DYW.2326.SM.6PAMU.1	Colon	Training Set	Normal
GTEX.14DAQ.2926.SM.664MV.1	Colon	Training Set	Normal
GTEX.1QW4Y.1326.SM.EWRMZ.1	Colon	Training Set	Normal
GTEX.1JMPY.1026.SM.ARZN1.1	Colon	Training Set	Normal
GTEX.1R9K5.2126.SM.E8VN1.1	Colon	Training Set	Normal
GTEX.15F5U.1426.SM.7KUN2.1	Colon	Training Set	Normal
GTEX.15ER7.2826.SM.6PAN2.1	Colon	Training Set	Normal
GTEX.1JMQK.2326.SM.ARZN4.1	Colon	Training Set	Normal
GTEX.17F96.2026.SM.79ON4.1	Colon	Training Set	Normal
GTEX.1PPH8.2226.SM.EWRN7.1	Colon	Training Set	Normal
GTEX.17F9Y.2626.SM.7IGN9.1	Colon	Training Set	Normal
GTEX.17JCI.2826.SM.7IGNA.1	Colon	Training Set	Normal
GTEX.QV31.0826.SM.CKZNC.1	Colon	Training Set	Normal
GTEX.15DZA.1026.SM.6PAND.1	Colon	Training Set	Normal
GTEX.1B8L1.1926.SM.7IGND.1	Colon	Training Set	Normal
GTEX.1JKYN.2226.SM.ARZNE.1	Colon	Training Set	Normal
GTEX.1BAJH.2726.SM.7IGNJ.1	Colon	Training Set	Normal
GTEX.1EMGI.2626.SM.7IGNR.1	Colon	Training Set	Normal
GTEX.14PKV.2126.SM.664O3.1	Colon	Training Set	Normal
GTEX.1MUQO.2626.SM.EWRO3.1	Colon	Training Set	Normal
GTEX.1CB4G.2726.SM.79OO4.1	Colon	Training Set	Normal
GTEX.17F98.1026.SM.7IGO8.1	Colon	Training Set	Normal
GTEX.1ICLZ.2426.SM.CKZOD.1	Colon	Training Set	Normal
GTEX.1IDJF.1826.SM.CKZOE.1	Colon	Training Set	Normal
GTEX.1GMR3.2826.SM.9WPOG.1	Colon	Training Set	Normal
GTEX.14XAO.2026.SM.69LOI.1	Colon	Training Set	Normal
GTEX.1S831.1726.SM.EWROJ.1	Colon	Training Set	Normal
GTEX.YEC3.2026.SM.DKPOL.1	Colon	Training Set	Normal
GTEX.14PK6.1826.SM.69LOM.1	Colon	Training Set	Normal
GTEX.1OFPY.1226.SM.E76OM.1	Colon	Training Set	Normal
GTEX.1JKYR.2026.SM.CNPON.1	Colon	Training Set	Normal
GTEX.147GR.2726.SM.664OO.1	Colon	Training Set	Normal
GTEX.1QP67.1426.SM.E8VOO.1	Colon	Training Set	Normal
GTEX.1GTWX.2626.SM.9WPOT.1	Colon	Training Set	Normal
GTEX.1E2YA.2526.SM.7IGOU.1	Colon	Training Set	Normal
GTEX.1JK1U.1426.SM.CNPOW.1	Colon	Training Set	Normal
GTEX.1F75I.2426.SM.9WPOY.1	Colon	Training Set	Normal
GTEX.1QW4Y.1426.SM.E76P3.1	Colon	Training Set	Normal
GTEX.1PBJI.2526.SM.E6CP4.1	Colon	Training Set	Normal
GTEX.1RAZQ.2026.SM.E76P7.1	Colon	Training Set	Normal
GTEX.1PIEJ.2026.SM.E6CPA.1	Colon	Training Set	Normal
GTEX.1H1DG.2226.SM.9WPPC.1	Colon	Training Set	Normal
GTEX.1LVAN.2526.SM.CNPPC.1	Colon	Training Set	Normal
GTEX.1H3VY.2426.SM.9WPPD.1	Colon	Training Set	Normal
GTEX.1MA7W.0826.SM.DKPPF.1	Colon	Training Set	Normal
GTEX.17EVQ.1826.SM.7IGPH.1	Colon	Training Set	Normal
GTEX.1I1GT.2026.SM.CKZPK.1	Colon	Training Set	Normal
GTEX.14JG6.1726.SM.69LPL.1	Colon	Training Set	Normal
GTEX.1IDJI.2226.SM.CKZPM.1	Colon	Training Set	Normal
GTEX.1GMRU.2626.SM.9WPPM.1	Colon	Training Set	Normal
GTEX.1GZ4I.2426.SM.9WPPP.1	Colon	Training Set	Normal
GTEX.1LGRB.1426.SM.CNNPT.1	Colon	Training Set	Normal
GTEX.1PDJ9.2026.SM.E76PT.1	Colon	Training Set	Normal
GTEX.1JMQL.2426.SM.CNNPW.1	Colon	Training Set	Normal
GTEX.1QP9N.1026.SM.E6CPX.1	Colon	Training Set	Normal
GTEX.1JMPY.0426.SM.C1YQ3.1	Colon	Training Set	Normal
GTEX.15DZA.0926.SM.69LQ3.1	Colon	Training Set	Normal
GTEX.1J1R8.1126.SM.CNPQ3.1	Colon	Training Set	Normal
GTEX.1QP29.2526.SM.E6CQ3.1	Colon	Training Set	Normal
GTEX.1IKK5.2726.SM.CNPQ6.1	Colon	Training Set	Normal
GTEX.1C4CL.2126.SM.7IGQC.1	Colon	Training Set	Normal
GTEX.1EU9M.2726.SM.7P8QD.1	Colon	Training Set	Normal
GTEX.1NHNU.2326.SM.E6CQE.1	Colon	Training Set	Normal
GTEX.1I1GR.2526.SM.CNNQF.1	Colon	Training Set	Normal
GTEX.1LVAN.2626.SM.CNPQF.1	Colon	Training Set	Normal
GTEX.14PJ3.0926.SM.69LQG.1	Colon	Training Set	Normal
GTEX.1N5O9.2726.SM.E76QH.1	Colon	Training Set	Normal
GTEX.1CAMR.1026.SM.7P8QI.1	Colon	Training Set	Normal
GTEX.145LT.0826.SM.5S2QL.1	Colon	Training Set	Normal
GTEX.1EH9U.1926.SM.7P8QM.1	Colon	Training Set	Normal
GTEX.1F75B.2726.SM.7P8QO.1	Colon	Training Set	Normal
GTEX.1HCU7.2626.SM.C1YQO.1	Colon	Training Set	Normal
GTEX.1GF9X.1526.SM.7P8QP.1	Colon	Training Set	Normal
GTEX.1JMPZ.2426.SM.C1YQP.1	Colon	Training Set	Normal
GTEX.1GMR3.2526.SM.7P8QS.1	Colon	Training Set	Normal
GTEX.1R9JW.2126.SM.E76QT.1	Colon	Training Set	Normal
GTEX.1IL2U.2526.SM.C1YQV.1	Colon	Training Set	Normal
GTEX.1PWST.2526.SM.E76QW.1	Colon	Training Set	Normal
GTEX.14DAQ.2726.SM.5S2QY.1	Colon	Training Set	Normal
GTEX.1GPI7.1726.SM.7P8R1.1	Colon	Training Set	Normal
GTEX.1C64O.2426.SM.7P8R3.1	Colon	Training Set	Normal
GTEX.1QCLZ.1926.SM.E6CR3.1	Colon	Training Set	Normal
GTEX.1QMI2.2626.SM.E6CR4.1	Colon	Training Set	Normal
GTEX.1JKYR.1926.SM.C1YR7.1	Colon	Training Set	Normal
GTEX.1QPFJ.2326.SM.E6CR7.1	Colon	Training Set	Normal
GTEX.QLQ7.1126.SM.CYPRB.1	Colon	Training Set	Normal
GTEX.1HSMQ.2726.SM.C1YRE.1	Colon	Training Set	Normal
GTEX.1RAZR.1926.SM.E6CRF.1	Colon	Training Set	Normal
GTEX.16AAH.1326.SM.7KFRG.1	Colon	Training Set	Normal
GTEX.18D9A.1126.SM.7KFRJ.1	Colon	Training Set	Normal
GTEX.1POEN.2026.SM.E6CRL.1	Colon	Training Set	Normal
GTEX.1JN76.1226.SM.C1YRM.1	Colon	Training Set	Normal
GTEX.1IGQW.2326.SM.CE6RV.1	Colon	Training Set	Normal
GTEX.15RIE.2026.SM.7KFRW.1	Colon	Training Set	Normal
GTEX.1HSGN.2626.SM.CE6S1.1	Colon	Training Set	Normal
GTEX.16NGA.1026.SM.7KFS3.1	Colon	Training Set	Normal
GTEX.1EMGI.2726.SM.7P8S4.1	Colon	Training Set	Normal
GTEX.17MFQ.1226.SM.7KFSA.1	Colon	Training Set	Normal
GTEX.1JMLX.2726.SM.CM2SB.1	Colon	Training Set	Normal
GTEX.1HSEH.1926.SM.A96SB.1	Colon	Training Set	Normal
GTEX.1PIIG.2126.SM.EXUSD.1	Colon	Training Set	Normal
GTEX.1N2EF.1726.SM.EXUSI.1	Colon	Training Set	Normal
GTEX.1CB4I.2226.SM.7P8SL.1	Colon	Training Set	Normal
GTEX.17F96.2126.SM.7KFSM.1	Colon	Training Set	Normal
GTEX.1I6K6.1926.SM.A96SN.1	Colon	Training Set	Normal
GTEX.18A66.2426.SM.7KFSQ.1	Colon	Training Set	Normal
GTEX.1IKOE.2126.SM.A96T5.1	Colon	Training Set	Normal
GTEX.1J8EW.2426.SM.CE6T5.1	Colon	Training Set	Normal
GTEX.1F5PK.1926.SM.7MXT7.1	Colon	Training Set	Normal
GTEX.13OVK.1026.SM.7KFTC.1	Colon	Training Set	Normal
GTEX.1CAMR.0926.SM.7MXTD.1	Colon	Training Set	Normal
GTEX.1IDJD.2226.SM.A96TD.1	Colon	Training Set	Normal
GTEX.1GZ4H.1326.SM.7P8TE.1	Colon	Training Set	Normal
GTEX.18D9U.1926.SM.7KFTM.1	Colon	Training Set	Normal
GTEX.1F5PL.1926.SM.7MXTP.1	Colon	Training Set	Normal
GTEX.1HFI7.1626.SM.9WYTR.1	Colon	Training Set	Normal
GTEX.1HBPI.2226.SM.9WYTY.1	Colon	Training Set	Normal
GTEX.14C5O.2526.SM.73KU2.1	Colon	Training Set	Normal
GTEX.1H1DE.1626.SM.9KNU5.1	Colon	Training Set	Normal
GTEX.1AX9I.2626.SM.73KU5.1	Colon	Training Set	Normal
GTEX.1HBPM.2626.SM.9WYU5.1	Colon	Training Set	Normal
GTEX.1C64O.2326.SM.73KU8.1	Colon	Training Set	Normal
GTEX.1GZ4H.1226.SM.9KNUA.1	Colon	Training Set	Normal
GTEX.1GN73.2726.SM.9WYUB.1	Colon	Training Set	Normal
GTEX.1AX8Z.2726.SM.73KUC.1	Colon	Training Set	Normal
GTEX.1HCVE.2326.SM.9WYUD.1	Colon	Training Set	Normal
GTEX.1B932.2826.SM.73KUD.1	Colon	Training Set	Normal
GTEX.1HKZK.2026.SM.9WYUF.1	Colon	Training Set	Normal
GTEX.1GPI7.1926.SM.9KNUH.1	Colon	Training Set	Normal
GTEX.1B97I.1526.SM.73KUK.1	Colon	Training Set	Normal
GTEX.1C6VQ.2726.SM.73KUL.1	Colon	Training Set	Normal
GTEX.1GMR2.1826.SM.9KNUP.1	Colon	Training Set	Normal
GTEX.1GN73.2626.SM.9KNUQ.1	Colon	Training Set	Normal
GTEX.1AX9K.1626.SM.73KUS.1	Colon	Training Set	Normal
GTEX.14BIN.3026.SM.5ZZUS.1	Colon	Training Set	Normal
GTEX.1C2JI.1726.SM.73KUW.1	Colon	Training Set	Normal
GTEX.1GF9U.1526.SM.7MXUW.1	Colon	Training Set	Normal
GTEX.1GL5R.1726.SM.9KNUX.1	Colon	Training Set	Normal
GTEX.1AX9J.2526.SM.73KUY.1	Colon	Training Set	Normal
GTEX.1GL5R.2426.SM.7MXV1.1	Colon	Training Set	Normal
GTEX.13PVR.1626.SM.73KVF.1	Colon	Training Set	Normal
GTEX.17HII.2726.SM.7MGVM.1	Colon	Training Set	Normal
GTEX.1H23P.2626.SM.9KNVN.1	Colon	Training Set	Normal
GTEX.1H3NZ.2526.SM.9KNVO.1	Colon	Training Set	Normal
GTEX.1AMEY.1926.SM.73KVT.1	Colon	Training Set	Normal
GTEX.1H3VE.2326.SM.9KNVU.1	Colon	Training Set	Normal
GTEX.14PJ3.1226.SM.5ZZVY.1	Colon	Training Set	Normal
GTEX.1H3VY.2526.SM.9KNW1.1	Colon	Training Set	Normal
GTEX.14C39.1926.SM.5ZZW5.1	Colon	Training Set	Normal
GTEX.1GMR8.2926.SM.9KNW5.1	Colon	Training Set	Normal
GTEX.1HBPN.2026.SM.B2LWA.1	Colon	Training Set	Normal
GTEX.1AMFI.1826.SM.73KWB.1	Colon	Training Set	Normal
GTEX.1H1E6.1926.SM.9OSWD.1	Colon	Training Set	Normal
GTEX.1HCUA.1926.SM.B2LWE.1	Colon	Training Set	Normal
GTEX.14H4A.1926.SM.5ZZWN.1	Colon	Training Set	Normal
GTEX.1I4MK.1126.SM.B2LWS.1	Colon	Training Set	Normal
GTEX.15CHC.1626.SM.5ZZWS.1	Colon	Training Set	Normal
GTEX.1HCU6.2926.SM.B2LWV.1	Colon	Training Set	Normal
GTEX.1E2YA.2626.SM.7MGWW.1	Colon	Training Set	Normal
GTEX.1AX8Y.1926.SM.73KWX.1	Colon	Training Set	Normal
GTEX.1I6K6.1826.SM.B2LX5.1	Colon	Training Set	Normal
GTEX.1A32A.2626.SM.73KX9.1	Colon	Training Set	Normal
GTEX.1HSEH.1726.SM.B2LXH.1	Colon	Training Set	Normal
GTEX.1HBPH.2526.SM.ACKXK.1	Colon	Training Set	Normal
GTEX.13QJ3.2626.SM.9OSXQ.1	Colon	Training Set	Normal
GTEX.1HCU9.1326.SM.B2LXT.1	Colon	Training Set	Normal
GTEX.1QCLY.1726.SM.DPRXY.1	Colon	Training Set	Normal
GTEX.1CAMS.2626.SM.7PBY3.1	Colon	Training Set	Normal
GTEX.1ICG6.2226.SM.B2LY7.1	Colon	Training Set	Normal
GTEX.1R9PM.1526.SM.DPRY8.1	Colon	Training Set	Normal
GTEX.1N2DV.1426.SM.DPRYQ.1	Colon	Training Set	Normal
GTEX.1EH9U.2026.SM.7PBYS.1	Colon	Training Set	Normal
GTEX.14PKV.1926.SM.686YU.1	Colon	Training Set	Normal
GTEX.1LG7Z.1426.SM.CXKYV.1	Colon	Training Set	Normal
GTEX.15CHQ.2626.SM.686YZ.1	Colon	Training Set	Normal
GTEX.1B996.2626.SM.73KZ1.1	Colon	Training Set	Normal
GTEX.ZLWG.1726.SM.DNZZ2.1	Colon	Training Set	Normal
GTEX.1PFEY.1726.SM.DPRZ4.1	Colon	Training Set	Normal
GTEX.14PJM.2626.SM.686ZD.1	Colon	Training Set	Normal
GTEX.13OVJ.1426.SM.5K7Z2.1	Esophagus	Training Set	Normal
GTEX.XQ8I.1526.SM.4BOOH.1	Esophagus	Training Set	Normal
GTEX.11ZUS.0926.SM.5FQSY.1	Esophagus	Training Set	Normal
GTEX.T5JW.1426.SM.4DM5Q.1	Esophagus	Training Set	Normal
GTEX.XPVG.1426.SM.4B668.1	Esophagus	Training Set	Normal
GTEX.YB5E.0926.SM.4WWDQ.1	Esophagus	Training Set	Normal
GTEX.132AR.2226.SM.5J2NT.1	Esophagus	Training Set	Normal
GTEX.14E6E.0726.SM.5S2R3.1	Esophagus	Training Set	Normal
GTEX.WZTO.1726.SM.4PQYV.1	Esophagus	Training Set	Normal
GTEX.ZEX8.1526.SM.4WWBE.1	Esophagus	Training Set	Normal
GTEX.139T6.0726.SM.5PNVK.1	Esophagus	Training Set	Normal
GTEX.ZQUD.0626.SM.51MR2.1	Esophagus	Training Set	Normal
GTEX.WYJK.1926.SM.4ONDP.1	Esophagus	Training Set	Normal
GTEX.12BJ1.1626.SM.5HL8Y.1	Esophagus	Training Set	Normal
GTEX.ZYWO.1026.SM.5E45U.1	Esophagus	Training Set	Normal
GTEX.RVPV.0526.SM.47JYL.1	Esophagus	Training Set	Normal
GTEX.146FQ.1126.SM.5NQBM.1	Esophagus	Training Set	Normal
GTEX.12C56.0426.SM.5FQU1.1	Esophagus	Training Set	Normal
GTEX.QDVJ.0726.SM.48U1W.1	Esophagus	Training Set	Normal
GTEX.12WSD.1926.SM.5GCOV.1	Esophagus	Training Set	Normal
GTEX.TML8.1426.SM.4DXUT.1	Esophagus	Training Set	Normal
GTEX.XUZC.0326.SM.4BOO8.1	Esophagus	Training Set	Normal
GTEX.PLZ4.1626.SM.3P618.3	Esophagus	Training Set	Normal
GTEX.ZF29.1326.SM.4WWB6.1	Esophagus	Training Set	Normal
GTEX.QDVN.1026.SM.48TZA.1	Esophagus	Training Set	Normal
GTEX.WQUQ.1626.SM.4OOSH.1	Esophagus	Training Set	Normal
GTEX.RTLS.1126.SM.46MUQ.1	Esophagus	Training Set	Normal
GTEX.144GM.1426.SM.5LU31.1	Esophagus	Training Set	Normal
GTEX.OIZH.0626.SM.3NB1L.1	Esophagus	Training Set	Normal
GTEX.O5YT.0726.SM.3MJHA.1	Esophagus	Training Set	Normal
GTEX.WRHK.0526.SM.4MVOF.1	Esophagus	Training Set	Normal
GTEX.PSDG.1426.SM.48TD1.1	Esophagus	Training Set	Normal
GTEX.139YR.1826.SM.5LZXA.1	Esophagus	Training Set	Normal
GTEX.ZUA1.1226.SM.5NQ6O.1	Esophagus	Training Set	Normal
GTEX.12WSL.1226.SM.5DUXE.1	Esophagus	Training Set	Normal
GTEX.X5EB.1026.SM.46MVU.1	Esophagus	Training Set	Normal
GTEX.YEC3.1926.SM.4WWF5.1	Esophagus	Training Set	Normal
GTEX.ZLFU.1026.SM.5EQMZ.1	Esophagus	Training Set	Normal
GTEX.WVLH.1426.SM.4MVNX.1	Esophagus	Training Set	Normal
GTEX.OXRK.1326.SM.3NB1A.1	Esophagus	Training Set	Normal
GTEX.WFON.0926.SM.4LVMK.1	Esophagus	Training Set	Normal
GTEX.QVUS.0626.SM.447CC.1	Esophagus	Training Set	Normal
GTEX.YF7O.1026.SM.5P9IP.1	Esophagus	Training Set	Normal
GTEX.X8HC.1526.SM.46MWD.1	Esophagus	Training Set	Normal
GTEX.WEY5.1026.SM.4LMK9.1	Esophagus	Training Set	Normal
GTEX.X8HC.1326.SM.46MWB.1	Esophagus	Training Set	Normal
GTEX.OOBK.0625.SM.3LK5P.1	Esophagus	Training Set	Normal
GTEX.NPJ8.1926.SM.3MJGB.1	Esophagus	Training Set	Normal
GTEX.146FH.1926.SM.5Q5B2.1	Esophagus	Training Set	Normal
GTEX.ZTX8.0326.SM.59HLA.1	Esophagus	Training Set	Normal
GTEX.11ZTT.0926.SM.5EQMS.1	Esophagus	Training Set	Normal
GTEX.13OVI.2626.SM.5KM4T.1	Esophagus	Training Set	Normal
GTEX.11O72.2026.SM.5N9G8.1	Esophagus	Training Set	Normal
GTEX.144GN.0626.SM.5O9B2.1	Esophagus	Training Set	Normal
GTEX.S4Z8.0826.SM.4AD4J.1	Esophagus	Training Set	Normal
GTEX.RU72.0726.SM.46MUW.1	Esophagus	Training Set	Normal
GTEX.1399S.1226.SM.5J1O6.1	Esophagus	Training Set	Normal
GTEX.13FTW.1626.SM.5KM4N.1	Esophagus	Training Set	Normal
GTEX.12696.1426.SM.5EGJ6.1	Esophagus	Training Set	Normal
GTEX.WXYG.1026.SM.4ONCD.1	Esophagus	Training Set	Normal
GTEX.146FR.0526.SM.5Q5EX.1	Esophagus	Training Set	Normal
GTEX.1212Z.2126.SM.5FQTM.1	Esophagus	Training Set	Normal
GTEX.12ZZY.1526.SM.5LZWF.1	Esophagus	Training Set	Normal
GTEX.11ZU8.1526.SM.5EGHX.1	Esophagus	Training Set	Normal
GTEX.VUSG.1026.SM.4KKZN.1	Esophagus	Training Set	Normal
GTEX.14BMV.1426.SM.5S2WA.1	Esophagus	Training Set	Normal
GTEX.ZVT3.1426.SM.59HLP.1	Esophagus	Training Set	Normal
GTEX.ZVT2.1226.SM.5GU5H.1	Esophagus	Training Set	Normal
GTEX.WFG8.1126.SM.4LVN1.1	Esophagus	Training Set	Normal
GTEX.13FLV.1126.SM.5J2NO.1	Esophagus	Training Set	Normal
GTEX.11TT1.0526.SM.5P9JO.1	Esophagus	Training Set	Normal
GTEX.U8XE.1726.SM.4E3IF.1	Esophagus	Training Set	Normal
GTEX.S4P3.0426.SM.4AD56.1	Esophagus	Training Set	Normal
GTEX.12WSK.1126.SM.5LZV8.1	Esophagus	Training Set	Normal
GTEX.X4EP.1626.SM.4QAS6.1	Esophagus	Training Set	Normal
GTEX.XBED.1126.SM.48TCF.1	Esophagus	Training Set	Normal
GTEX.PWN1.0626.SM.48TDT.1	Esophagus	Training Set	Normal
GTEX.QESD.0726.SM.4R1KQ.1	Esophagus	Training Set	Normal
GTEX.ZTX8.0226.SM.5E44D.1	Esophagus	Training Set	Normal
GTEX.RU72.0826.SM.46MUS.1	Esophagus	Training Set	Normal
GTEX.13N1W.1926.SM.5IJCH.1	Esophagus	Training Set	Normal
GTEX.RU1J.0426.SM.46MUK.1	Esophagus	Training Set	Normal
GTEX.13RTK.0626.SM.5Q5EK.1	Esophagus	Training Set	Normal
GTEX.WH7G.1026.SM.4LVML.1	Esophagus	Training Set	Normal
GTEX.R53T.1126.SM.48FD4.1	Esophagus	Training Set	Normal
GTEX.P78B.1126.SM.3P615.1	Esophagus	Training Set	Normal
GTEX.13FTX.0526.SM.5IFGS.1	Esophagus	Training Set	Normal
GTEX.13QBU.0826.SM.5IJBU.1	Esophagus	Training Set	Normal
GTEX.13PVR.1826.SM.5Q5CC.1	Esophagus	Training Set	Normal
GTEX.117YX.1626.SM.5GZZG.1	Esophagus	Training Set	Normal
GTEX.139TU.1226.SM.5J2NL.1	Esophagus	Training Set	Normal
GTEX.11EM3.0826.SM.5N9CC.1	Esophagus	Training Set	Normal
GTEX.11LCK.1726.SM.5S2OQ.1	Esophagus	Training Set	Normal
GTEX.P78B.1126.SM.3P615.2	Esophagus	Training Set	Normal
GTEX.U3ZH.1126.SM.4DXUG.1	Esophagus	Training Set	Normal
GTEX.11XUK.0726.SM.5EQMX.1	Esophagus	Training Set	Normal
GTEX.13O21.0626.SM.5IJDI.1	Esophagus	Training Set	Normal
GTEX.11P81.0926.SM.59874.1	Esophagus	Training Set	Normal
GTEX.139YR.1626.SM.5IJGK.1	Esophagus	Training Set	Normal
GTEX.ZTTD.1226.SM.51MS2.1	Esophagus	Training Set	Normal
GTEX.OXRK.1426.SM.3NB19.1	Esophagus	Training Set	Normal
GTEX.YB5E.0826.SM.4VDRZ.1	Esophagus	Training Set	Normal
GTEX.11ILO.1026.SM.5A5LP.1	Esophagus	Training Set	Normal
GTEX.11P7K.1326.SM.5BC5G.1	Esophagus	Training Set	Normal
GTEX.13FHP.1526.SM.5IJGE.1	Esophagus	Training Set	Normal
GTEX.1399R.0726.SM.5KM2A.1	Esophagus	Training Set	Normal
GTEX.WFON.0826.SM.4LVMI.1	Esophagus	Training Set	Normal
GTEX.1192W.0826.SM.5EGHE.1	Esophagus	Training Set	Normal
GTEX.Z9EW.0526.SM.5HL8S.1	Esophagus	Training Set	Normal
GTEX.146FQ.1026.SM.5LU8I.1	Esophagus	Training Set	Normal
GTEX.144GO.2726.SM.5O9A2.1	Esophagus	Training Set	Normal
GTEX.X585.1426.SM.4E3JO.1	Esophagus	Training Set	Normal
GTEX.13CF3.1726.SM.5LU9E.1	Esophagus	Training Set	Normal
GTEX.QMRM.0926.SM.447BR.1	Esophagus	Training Set	Normal
GTEX.13FHO.1726.SM.5IFGM.1	Esophagus	Training Set	Normal
GTEX.ZAB4.1126.SM.5HL86.1	Esophagus	Training Set	Normal
GTEX.V1D1.1126.SM.4JBHT.1	Esophagus	Training Set	Normal
GTEX.132NY.2026.SM.5L3FM.1	Esophagus	Training Set	Normal
GTEX.YEC4.1026.101814.SM.5P9FX.1	Esophagus	Training Set	Normal
GTEX.Y8E4.1826.SM.4VBPV.1	Esophagus	Training Set	Normal
GTEX.OXRL.0726.SM.3NM9A.1	Esophagus	Training Set	Normal
GTEX.X4LF.0826.SM.4QASC.1	Esophagus	Training Set	Normal
GTEX.S7SF.1026.SM.4AD4I.1	Esophagus	Training Set	Normal
GTEX.NFK9.1226.SM.3LK79.1	Esophagus	Training Set	Normal
GTEX.12C56.1226.SM.5FQSU.1	Esophagus	Training Set	Normal
GTEX.OHPM.0726.SM.3LK7A.1	Esophagus	Training Set	Normal
GTEX.UPK5.1326.SM.4IHLE.1	Esophagus	Training Set	Normal
GTEX.11XUK.0926.SM.5EQL3.1	Esophagus	Training Set	Normal
GTEX.ZYVF.2526.SM.5E45C.1	Esophagus	Training Set	Normal
GTEX.11P7K.1226.SM.5HL4X.1	Esophagus	Training Set	Normal
GTEX.131XE.1226.SM.5EGKF.1	Esophagus	Training Set	Normal
GTEX.ZZPU.1826.SM.5E43L.1	Esophagus	Training Set	Normal
GTEX.P4QS.0626.SM.3NMD1.1	Esophagus	Training Set	Normal
GTEX.RM2N.0626.SM.48FD6.1	Esophagus	Training Set	Normal
GTEX.144GM.1626.SM.5O9AG.1	Esophagus	Training Set	Normal
GTEX.WEY5.1126.SM.4LMIE.1	Esophagus	Training Set	Normal
GTEX.XV7Q.1226.SM.4BRVT.1	Esophagus	Training Set	Normal
GTEX.X15G.1026.SM.4PQZF.1	Esophagus	Training Set	Normal
GTEX.ZE9C.1126.SM.4WWBD.1	Esophagus	Training Set	Normal
GTEX.11WQK.2226.SM.5CVL7.1	Esophagus	Training Set	Normal
GTEX.WK11.1026.SM.4OOS8.1	Esophagus	Training Set	Normal
GTEX.132QS.1626.SM.5K7YZ.1	Esophagus	Training Set	Normal
GTEX.11LCK.1526.SM.5HL64.1	Esophagus	Training Set	Normal
GTEX.11I78.1426.SM.5PNVY.1	Esophagus	Training Set	Normal
GTEX.ZGAY.1126.SM.4WWBS.1	Esophagus	Training Set	Normal
GTEX.PLZ6.0526.SM.3P61C.3	Esophagus	Training Set	Normal
GTEX.ZLV1.0526.SM.4WWD4.1	Esophagus	Training Set	Normal
GTEX.13O61.1226.SM.5KM21.1	Esophagus	Training Set	Normal
GTEX.OXRP.0926.SM.48TC1.1	Esophagus	Training Set	Normal
GTEX.P4QT.0626.SM.3NMCP.1	Esophagus	Training Set	Normal
GTEX.13G51.0926.SM.5IFFU.1	Esophagus	Training Set	Normal
GTEX.RNOR.1226.SM.48FDQ.1	Esophagus	Training Set	Normal
GTEX.111CU.0626.SM.5EGHL.1	Esophagus	Training Set	Normal
GTEX.OIZI.1326.SM.3NB1B.1	Esophagus	Training Set	Normal
GTEX.12ZZW.1726.SM.5DUVD.1	Esophagus	Training Set	Normal
GTEX.13FH7.0726.SM.5J2NK.1	Esophagus	Training Set	Normal
GTEX.QEL4.1426.SM.447AC.1	Esophagus	Training Set	Normal
GTEX.Y3IK.1226.SM.4WWEK.1	Esophagus	Training Set	Normal
GTEX.XBEW.1326.SM.4AT63.1	Esophagus	Training Set	Normal
GTEX.11TT1.0626.SM.5GU4X.1	Esophagus	Training Set	Normal
GTEX.X4LF.0626.SM.4QASB.1	Esophagus	Training Set	Normal
GTEX.1399U.1226.SM.5K7XT.1	Esophagus	Training Set	Normal
GTEX.14DAQ.1626.SM.5S2R1.1	Esophagus	Training Set	Normal
GTEX.14E7W.1926.SM.5S2R9.1	Esophagus	Training Set	Normal
GTEX.WYBS.1626.SM.4ONCA.1	Esophagus	Training Set	Normal
GTEX.YEC4.1026.SM.5P9FW.1	Esophagus	Training Set	Normal
GTEX.12696.1326.SM.5FQTJ.1	Esophagus	Training Set	Normal
GTEX.13111.0926.SM.5DUVQ.1	Esophagus	Training Set	Normal
GTEX.145MN.1126.SM.5RQJB.1	Esophagus	Training Set	Normal
GTEX.13U4I.1226.SM.5LU5M.1	Esophagus	Training Set	Normal
GTEX.13X6K.2126.SM.5O9D4.1	Esophagus	Training Set	Normal
GTEX.11LCK.1626.SM.5PNYB.1	Esophagus	Training Set	Normal
GTEX.13N2G.1226.SM.5IJCI.1	Esophagus	Training Set	Normal
GTEX.POMQ.0626.SM.3P61E.3	Esophagus	Training Set	Normal
GTEX.11P82.0426.SM.5HL5D.1	Esophagus	Training Set	Normal
GTEX.QEG5.1326.SM.4R1JS.1	Esophagus	Training Set	Normal
GTEX.11I78.1526.SM.5A5K7.1	Esophagus	Training Set	Normal
GTEX.ZAB5.1226.SM.5P9FY.1	Esophagus	Training Set	Normal
GTEX.11DYG.1426.SM.5A5JR.1	Esophagus	Training Set	Normal
GTEX.YF7O.0826.SM.4W21F.1	Esophagus	Training Set	Normal
GTEX.XMD2.1326.SM.4YCET.1	Esophagus	Training Set	Normal
GTEX.WFJO.0426.SM.4LVM7.1	Esophagus	Training Set	Normal
GTEX.111CU.0826.SM.5EGIJ.1	Esophagus	Training Set	Normal
GTEX.XBEW.1426.SM.4AT4J.1	Esophagus	Training Set	Normal
GTEX.ZVT2.1326.SM.5E45H.1	Esophagus	Training Set	Normal
GTEX.PLZ5.0926.SM.4RGM9.1	Esophagus	Training Set	Normal
GTEX.145LS.1826.SM.5LUAZ.1	Esophagus	Training Set	Normal
GTEX.ZPCL.1326.SM.57WFN.1	Esophagus	Training Set	Normal
GTEX.PLZ5.0926.SM.3TW8L.1	Esophagus	Training Set	Normal
GTEX.145MO.1426.SM.5Q5BS.1	Esophagus	Training Set	Normal
GTEX.ZDYS.0926.SM.4WWCS.1	Esophagus	Training Set	Normal
GTEX.11UD2.1526.SM.5EQLQ.1	Esophagus	Training Set	Normal
GTEX.Y114.1126.SM.4TT7V.1	Esophagus	Training Set	Normal
GTEX.12ZZY.1426.SM.5N9EI.1	Esophagus	Training Set	Normal
GTEX.RUSQ.0826.SM.47JWW.1	Esophagus	Training Set	Normal
GTEX.13FLV.1326.SM.5L3EJ.1	Esophagus	Training Set	Normal
GTEX.Y111.1626.SM.57WCY.1	Esophagus	Training Set	Normal
GTEX.12WSJ.0826.SM.5PNWV.1	Esophagus	Training Set	Normal
GTEX.132QS.1526.SM.5J2MV.1	Esophagus	Training Set	Normal
GTEX.T5JC.1726.SM.4DM6U.1	Esophagus	Training Set	Normal
GTEX.12BJ1.1526.SM.5LUAQ.1	Esophagus	Training Set	Normal
GTEX.131XF.1126.SM.5HL8J.1	Esophagus	Training Set	Normal
GTEX.145LS.2026.SM.5Q5D7.1	Esophagus	Training Set	Normal
GTEX.1399U.1426.SM.5J1N8.1	Esophagus	Training Set	Normal
GTEX.WXYG.1226.SM.4ONCJ.1	Esophagus	Training Set	Normal
GTEX.13OVG.0626.SM.5IFEP.1	Esophagus	Training Set	Normal
GTEX.WK11.1126.SM.4OOSJ.1	Esophagus	Training Set	Normal
GTEX.U8XE.1326.SM.4E3JK.1	Esophagus	Training Set	Normal
GTEX.12WSJ.0726.SM.5GCN6.1	Esophagus	Training Set	Normal
GTEX.13O3P.1226.SM.5J2O8.1	Esophagus	Training Set	Normal
GTEX.14B4R.0426.SM.5Q5EI.1	Esophagus	Training Set	Normal
GTEX.139TU.1326.SM.5LZXW.1	Esophagus	Training Set	Normal
GTEX.P4QS.0726.SM.3NMCZ.1	Esophagus	Training Set	Normal
GTEX.OOBK.0726.SM.3LK5Q.1	Esophagus	Training Set	Normal
GTEX.ZZPT.1426.SM.5N9C5.1	Esophagus	Training Set	Normal
GTEX.13OVH.1826.SM.5K7YW.1	Esophagus	Training Set	Normal
GTEX.PLZ5.0826.SM.3P5ZW.3	Esophagus	Training Set	Normal
GTEX.ZVZP.1626.SM.5GIDJ.1	Esophagus	Training Set	Normal
GTEX.1339X.1226.SM.5PNVO.1	Esophagus	Training Set	Normal
GTEX.Z9EW.0626.SM.5HL95.1	Esophagus	Training Set	Normal
GTEX.T6MO.0526.SM.4DM6R.1	Esophagus	Training Set	Normal
GTEX.WFG7.1126.SM.4LMK3.1	Esophagus	Training Set	Normal
GTEX.PSDG.1326.SM.48TD2.1	Esophagus	Training Set	Normal
GTEX.P4QT.0726.SM.3NMCM.1	Esophagus	Training Set	Normal
GTEX.XQ3S.1126.SM.4BOPK.1	Esophagus	Training Set	Normal
GTEX.11ZTS.2726.SM.5EQLU.1	Esophagus	Training Set	Normal
GTEX.WH7G.0926.SM.4LVMJ.1	Esophagus	Training Set	Normal
GTEX.14A5H.1826.SM.5NQAB.1	Esophagus	Training Set	Normal
GTEX.Y5LM.1026.SM.4VDSQ.1	Esophagus	Training Set	Normal
GTEX.13VXU.1126.SM.5LU3U.1	Esophagus	Training Set	Normal
GTEX.Y8E4.1926.SM.4VBPW.1	Esophagus	Training Set	Normal
GTEX.11TUW.1226.SM.5GU7C.1	Esophagus	Training Set	Normal
GTEX.13CF3.1526.SM.5J2NB.1	Esophagus	Training Set	Normal
GTEX.R3RS.1326.SM.48FE7.1	Esophagus	Training Set	Normal
GTEX.QLQ7.0926.SM.447BC.1	Esophagus	Training Set	Normal
GTEX.ZPU1.1426.SM.4WWFU.1	Esophagus	Training Set	Normal
GTEX.PWN1.0726.SM.48TDR.1	Esophagus	Training Set	Normal
GTEX.Q2AG.1226.SM.4GICA.1	Esophagus	Training Set	Normal
GTEX.13O21.0826.SM.5J2NU.1	Esophagus	Training Set	Normal
GTEX.13FTW.1526.SM.5LZXC.1	Esophagus	Training Set	Normal
GTEX.S341.0426.SM.4AD5L.1	Esophagus	Training Set	Normal
GTEX.XV7Q.1026.SM.4BRVR.1	Esophagus	Training Set	Normal
GTEX.XGQ4.1526.SM.4AT6H.1	Esophagus	Training Set	Normal
GTEX.QV44.1026.SM.447CG.1	Esophagus	Training Set	Normal
GTEX.Q2AG.1326.SM.43V8K.1	Esophagus	Training Set	Normal
GTEX.14753.1926.SM.5NQAA.1	Esophagus	Training Set	Normal
GTEX.VJYA.0726.SM.4KL1T.1	Esophagus	Training Set	Normal
GTEX.11P81.1026.SM.5GU54.1	Esophagus	Training Set	Normal
GTEX.13W3W.1826.SM.5IJDE.1	Esophagus	Training Set	Normal
GTEX.ZC5H.1326.SM.5HL7E.1	Esophagus	Training Set	Normal
GTEX.PLZ6.0626.SM.5K7WJ.1	Esophagus	Training Set	Normal
GTEX.WOFM.0526.SM.4OOS2.1	Esophagus	Training Set	Normal
GTEX.12WSK.1326.SM.5CVNM.1	Esophagus	Training Set	Normal
GTEX.13W3W.1626.SM.5LU35.1	Esophagus	Training Set	Normal
GTEX.XXEK.0326.SM.4BRVV.1	Esophagus	Training Set	Normal
GTEX.14C5O.1726.SM.5RQI9.1	Esophagus	Training Set	Normal
GTEX.139UW.1126.SM.5IJEJ.1	Esophagus	Training Set	Normal
GTEX.TMMY.1126.SM.4DXSX.1	Esophagus	Training Set	Normal
GTEX.XQ8I.1826.SM.4BOOJ.1	Esophagus	Training Set	Normal
GTEX.111CU.0726.SM.5GZYD.1	Esophagus	Training Set	Normal
GTEX.QEG5.1426.SM.447AS.1	Esophagus	Training Set	Normal
GTEX.11XUK.0826.SM.5GU6P.1	Esophagus	Training Set	Normal
GTEX.PWCY.0826.SM.48TCR.1	Esophagus	Training Set	Normal
GTEX.T6MO.0626.SM.4DM6P.1	Esophagus	Training Set	Normal
GTEX.14ICL.0526.SM.5RQJ6.1	Esophagus	Training Set	Normal
GTEX.WFON.1026.SM.4LVMD.1	Esophagus	Training Set	Normal
GTEX.UJHI.0926.SM.4IHKF.1	Esophagus	Training Set	Normal
GTEX.YF7O.0926.SM.5IFIF.1	Esophagus	Training Set	Normal
GTEX.YFC4.1226.SM.5LU9R.1	Esophagus	Training Set	Normal
GTEX.S4Z8.0726.SM.4GICB.1	Esophagus	Training Set	Normal
GTEX.ZQG8.2226.SM.5DUWD.1	Esophagus	Training Set	Normal
GTEX.11I78.1626.SM.5A5M2.1	Esophagus	Training Set	Normal
GTEX.131XF.0926.SM.5BC69.1	Esophagus	Training Set	Normal
GTEX.WHSE.1626.SM.4M1XL.1	Esophagus	Training Set	Normal
GTEX.POMQ.0626.SM.3P61E.1	Esophagus	Training Set	Normal
GTEX.1122O.1826.SM.5EGIP.1	Esophagus	Training Set	Normal
GTEX.11O72.1926.SM.5PNW1.1	Esophagus	Training Set	Normal
GTEX.PLZ6.0626.SM.3P61B.3	Esophagus	Training Set	Normal
GTEX.WYVS.0726.SM.4ONDO.1	Esophagus	Training Set	Normal
GTEX.ZY6K.0526.SM.5GZY9.1	Esophagus	Training Set	Normal
GTEX.13NYB.1326.SM.5K7Y1.1	Esophagus	Training Set	Normal
GTEX.ZPIC.1926.SM.57WFQ.1	Esophagus	Training Set	Normal
GTEX.117YW.2026.SM.5N9BH.1	Esophagus	Training Set	Normal
GTEX.ZP4G.1126.SM.4WWCI.1	Esophagus	Training Set	Normal
GTEX.ZYWO.1126.SM.5U3SH.1	Esophagus	Training Set	Normal
GTEX.11DYG.1326.SM.5N9DO.1	Esophagus	Training Set	Normal
GTEX.X5EB.1426.SM.46MVW.1	Esophagus	Training Set	Normal
GTEX.113JC.0926.SM.5H114.1	Esophagus	Training Set	Normal
GTEX.OIZH.0726.SM.3NB1I.1	Esophagus	Training Set	Normal
GTEX.POMQ.0626.SM.3P61E.2	Esophagus	Training Set	Normal
GTEX.11NSD.1126.SM.5N9BQ.1	Esophagus	Training Set	Normal
GTEX.V1D1.1226.SM.4JBI5.1	Esophagus	Training Set	Normal
GTEX.WHSE.1426.SM.4M1XG.1	Esophagus	Training Set	Normal
GTEX.11EQ9.0826.SM.5986Y.1	Esophagus	Training Set	Normal
GTEX.13O1R.1526.SM.5J1O7.1	Esophagus	Training Set	Normal
GTEX.ZYVF.2226.SM.5GIDD.1	Esophagus	Training Set	Normal
GTEX.WFG7.1026.SM.4LMK8.1	Esophagus	Training Set	Normal
GTEX.X4EO.1226.SM.4QARR.1	Esophagus	Training Set	Normal
GTEX.14A6H.1326.SM.5NQBC.1	Esophagus	Training Set	Normal
GTEX.13QJ3.1826.SM.5S2PT.1	Esophagus	Training Set	Normal
GTEX.Y8LW.0526.SM.4VDS7.1	Esophagus	Training Set	Normal
GTEX.OXRL.0626.SM.3NM9C.1	Esophagus	Training Set	Normal
GTEX.Y8LW.0626.SM.4VDS8.1	Esophagus	Training Set	Normal
GTEX.X15G.0926.SM.4PQZE.1	Esophagus	Training Set	Normal
GTEX.R55E.1326.SM.48FCR.1	Esophagus	Training Set	Normal
GTEX.OIZG.1026.SM.3LK5X.1	Esophagus	Training Set	Normal
GTEX.PLZ6.0626.SM.5J1P1.1	Esophagus	Training Set	Normal
GTEX.ZDTT.1226.SM.4WKG9.1	Esophagus	Training Set	Normal
GTEX.S32W.1026.SM.4AD5W.1	Esophagus	Training Set	Normal
GTEX.QEG4.0726.SM.4R1JL.1	Esophagus	Training Set	Normal
GTEX.RU1J.0326.SM.46MUM.1	Esophagus	Training Set	Normal
GTEX.12WSL.1526.SM.5GCP8.1	Esophagus	Training Set	Normal
GTEX.PLZ5.0826.SM.4E3JR.1	Esophagus	Training Set	Normal
GTEX.T6MN.1526.SM.4DM5P.1	Esophagus	Training Set	Normal
GTEX.ZT9X.0526.SM.5GCOP.1	Esophagus	Training Set	Normal
GTEX.T5JW.1326.SM.4DM5G.1	Esophagus	Training Set	Normal
GTEX.1192X.1826.SM.5GIE2.1	Esophagus	Training Set	Normal
GTEX.145MF.1426.SM.5O9B6.1	Esophagus	Training Set	Normal
GTEX.YJ8A.1426.SM.5PNV7.1	Esophagus	Training Set	Normal
GTEX.Y8E4.1726.SM.5LU9G.1	Esophagus	Training Set	Normal
GTEX.13O21.0726.SM.5L3EG.1	Esophagus	Training Set	Normal
GTEX.11DYG.1926.SM.5H12I.1	Esophagus	Training Set	Normal
GTEX.13QBU.0926.SM.5K7WQ.1	Esophagus	Training Set	Normal
GTEX.N7MT.0226.SM.48TC3.1	Esophagus	Training Set	Normal
GTEX.XGQ4.1626.SM.4AT6J.1	Esophagus	Training Set	Normal
GTEX.WY7C.1326.SM.4ONCX.1	Esophagus	Training Set	Normal
GTEX.TML8.1526.SM.4DXUX.1	Esophagus	Training Set	Normal
GTEX.ZG7Y.1126.SM.4WWEZ.1	Esophagus	Training Set	Normal
GTEX.1399R.0826.SM.5IJEL.1	Esophagus	Training Set	Normal
GTEX.145LV.1326.SM.5S2QI.1	Esophagus	Training Set	Normal
GTEX.11OF3.2326.SM.5GU73.1	Esophagus	Training Set	Normal
GTEX.S33H.0826.SM.4AD5Y.1	Esophagus	Training Set	Normal
GTEX.12ZZX.1326.SM.5DUWI.1	Esophagus	Training Set	Normal
GTEX.11P81.0826.SM.5P9GR.1	Esophagus	Training Set	Normal
GTEX.13PL7.0526.SM.5J2MQ.1	Esophagus	Training Set	Normal
GTEX.U3ZM.0626.SM.4DXTV.1	Esophagus	Training Set	Normal
GTEX.12KS4.1026.SM.5FQTD.1	Esophagus	Training Set	Normal
GTEX.ZYW4.1626.SM.5GIE6.1	Esophagus	Training Set	Normal
GTEX.ZPCL.1226.SM.4WWFF.1	Esophagus	Training Set	Normal
GTEX.WHPG.1226.SM.4M1ZI.1	Esophagus	Training Set	Normal
GTEX.ZZ64.0226.SM.5E44X.1	Esophagus	Training Set	Normal
GTEX.ZPCL.1426.SM.57WEC.1	Esophagus	Training Set	Normal
GTEX.SNMC.0426.SM.4DM5Y.1	Esophagus	Training Set	Normal
GTEX.13QJ3.1726.SM.5RQK9.1	Esophagus	Training Set	Normal
GTEX.T5JC.1826.SM.4DM6E.1	Esophagus	Training Set	Normal
GTEX.OHPJ.1326.SM.3MJHG.1	Esophagus	Training Set	Normal
GTEX.P78B.1126.SM.3P615.3	Esophagus	Training Set	Normal
GTEX.ZTSS.0826.SM.5985L.1	Esophagus	Training Set	Normal
GTEX.XUZC.0526.SM.4BOPF.1	Esophagus	Training Set	Normal
GTEX.ZV7C.1326.SM.5BC7G.1	Esophagus	Training Set	Normal
GTEX.QDVN.1126.SM.48TZ7.1	Esophagus	Training Set	Normal
GTEX.YJ89.1526.SM.5P9IR.1	Esophagus	Training Set	Normal
GTEX.ZGAY.1526.SM.4WWEO.1	Esophagus	Training Set	Normal
GTEX.14AS3.0626.SM.5QGQD.1	Esophagus	Training Set	Normal
GTEX.13NYB.0926.SM.5IFFA.1	Esophagus	Training Set	Normal
GTEX.Y3IK.1126.SM.51MSV.1	Esophagus	Training Set	Normal
GTEX.QV31.0426.SM.447C4.1	Esophagus	Training Set	Normal
GTEX.13FHO.1826.SM.5K7Y6.1	Esophagus	Training Set	Normal
GTEX.SUCS.0726.SM.4DM7J.1	Esophagus	Training Set	Normal
GTEX.145LT.1126.SM.5LUA1.1	Esophagus	Training Set	Normal
GTEX.XUW1.1326.SM.4BOO1.1	Esophagus	Training Set	Normal
GTEX.VJYA.0626.SM.4KL1S.1	Esophagus	Training Set	Normal
GTEX.1399S.1526.SM.5P9JC.1	Esophagus	Training Set	Normal
GTEX.POYW.1326.SM.48TCG.1	Esophagus	Training Set	Normal
GTEX.1269C.1026.SM.5N9EY.1	Esophagus	Training Set	Normal
GTEX.PVOW.1626.SM.48TC9.1	Esophagus	Training Set	Normal
GTEX.13OW6.1626.SM.5IJD5.1	Esophagus	Training Set	Normal
GTEX.Q2AH.0826.SM.48TZN.1	Esophagus	Training Set	Normal
GTEX.X5EB.1526.SM.4E3JC.1	Esophagus	Training Set	Normal
GTEX.S3XE.0826.SM.4AD4U.1	Esophagus	Training Set	Normal
GTEX.13O3P.1326.SM.5K7Y8.1	Esophagus	Training Set	Normal
GTEX.146FH.1726.SM.5QGQ2.1	Esophagus	Training Set	Normal
GTEX.13113.1026.SM.5LZWM.1	Esophagus	Training Set	Normal
GTEX.ZTSS.0626.SM.59867.1	Esophagus	Training Set	Normal
GTEX.13NYB.0826.SM.5MR4V.1	Esophagus	Training Set	Normal
GTEX.ZEX8.1426.SM.4WKHQ.1	Esophagus	Training Set	Normal
GTEX.145LV.1426.SM.5Q5BV.1	Esophagus	Training Set	Normal
GTEX.ZT9W.1326.SM.51MTB.1	Esophagus	Training Set	Normal
GTEX.11ONC.1426.SM.5N9F4.1	Esophagus	Training Set	Normal
GTEX.XYKS.1126.SM.4BRWP.1	Esophagus	Training Set	Normal
GTEX.12696.1526.SM.5EGL6.1	Esophagus	Training Set	Normal
GTEX.Y5V6.1026.SM.4VBS2.1	Esophagus	Training Set	Normal
GTEX.P4PQ.0726.SM.3NMCR.1	Esophagus	Training Set	Normal
GTEX.12BJ1.1426.SM.5BC5Q.1	Esophagus	Training Set	Normal
GTEX.ZP4G.1026.SM.4YCE1.1	Esophagus	Training Set	Normal
GTEX.YJ8A.1226.SM.5IFHH.1	Esophagus	Training Set	Normal
GTEX.QV31.0526.SM.447C3.1	Esophagus	Training Set	Normal
GTEX.ZAB4.1226.SM.5CVN5.1	Esophagus	Training Set	Normal
GTEX.WHPG.1326.SM.4M1ZJ.1	Esophagus	Training Set	Normal
GTEX.YEC4.1126.SM.5CVLW.1	Esophagus	Training Set	Normal
GTEX.131XG.0926.SM.5LZW5.1	Esophagus	Training Set	Normal
GTEX.RTLS.1226.SM.46MUP.1	Esophagus	Training Set	Normal
GTEX.N7MS.1126.SM.3LK5E.1	Esophagus	Training Set	Normal
GTEX.13O3Q.0826.SM.5IFGF.1	Esophagus	Training Set	Normal
GTEX.147F3.0826.SM.5NQA7.1	Esophagus	Training Set	Normal
GTEX.X3Y1.1326.SM.4PQZB.1	Esophagus	Training Set	Normal
GTEX.117YW.1926.SM.5H121.1	Esophagus	Training Set	Normal
GTEX.1122O.1626.SM.5N9CX.1	Esophagus	Training Set	Normal
GTEX.13OVJ.1226.SM.5L3HA.1	Esophagus	Training Set	Normal
GTEX.14BIM.1226.SM.5SIBC.1	Esophagus	Training Set	Normal
GTEX.ZDYS.0826.SM.4WWCR.1	Esophagus	Training Set	Normal
GTEX.13OVL.2726.SM.5J2MP.1	Esophagus	Training Set	Normal
GTEX.1339X.1126.SM.5J2OI.1	Esophagus	Training Set	Normal
GTEX.YJ8O.0326.SM.5RQJW.1	Esophagus	Training Set	Normal
GTEX.T2YK.1326.SM.4DM6S.1	Esophagus	Training Set	Normal
GTEX.QDVJ.0826.SM.48U1S.1	Esophagus	Training Set	Normal
GTEX.U3ZM.0526.SM.4DXTB.1	Esophagus	Training Set	Normal
GTEX.13U4I.1126.SM.5LU3S.1	Esophagus	Training Set	Normal
GTEX.11VI4.0626.SM.5EQLO.1	Esophagus	Training Set	Normal
GTEX.ZG7Y.1326.SM.4WWBL.1	Esophagus	Training Set	Normal
GTEX.13PVQ.1726.SM.5IFF3.1	Esophagus	Training Set	Normal
GTEX.WHSB.0426.SM.4M1XI.1	Esophagus	Training Set	Normal
GTEX.YB5K.0626.SM.5LUB5.1	Esophagus	Training Set	Normal
GTEX.WVLH.1526.SM.4MVOC.1	Esophagus	Training Set	Normal
GTEX.S4Q7.0626.SM.4AD5M.1	Esophagus	Training Set	Normal
GTEX.1212Z.2026.SM.5N9EA.1	Esophagus	Training Set	Normal
GTEX.14H4A.1626.SM.5SI69.1	Esophagus	Training Set	Normal
GTEX.WHSB.0526.SM.4M1XM.1	Esophagus	Training Set	Normal
GTEX.ZU9S.1626.SM.5E452.1	Esophagus	Training Set	Normal
GTEX.PWOO.1026.SM.48TCN.1	Esophagus	Training Set	Normal
GTEX.SNMC.0526.SM.4DM69.1	Esophagus	Training Set	Normal
GTEX.ZT9W.1226.SM.57WE4.1	Esophagus	Training Set	Normal
GTEX.Y3IK.1326.SM.4YCD8.1	Esophagus	Training Set	Normal
GTEX.12KS4.0926.SM.5BC5S.1	Esophagus	Training Set	Normal
GTEX.ZTPG.1526.SM.51MTF.1	Esophagus	Training Set	Normal
GTEX.139YR.1726.SM.5IFFK.1	Esophagus	Training Set	Normal
GTEX.13W3W.1726.SM.5LU4A.1	Esophagus	Training Set	Normal
GTEX.ZV7C.1326.SM.51MSH.1	Esophagus	Training Set	Normal
GTEX.X3Y1.1126.SM.4PQZ9.1	Esophagus	Training Set	Normal
GTEX.ZTPG.1626.SM.5DUX2.1	Esophagus	Training Set	Normal
GTEX.YEC4.1226.SM.5CVLX.1	Esophagus	Training Set	Normal
GTEX.132AR.2526.SM.5PNVM.1	Esophagus	Training Set	Normal
GTEX.U4B1.0926.SM.4DXUV.1	Esophagus	Training Set	Normal
GTEX.ZT9W.1426.SM.4YCD2.1	Esophagus	Training Set	Normal
GTEX.Y111.1726.SM.4SOIQ.1	Esophagus	Training Set	Normal
GTEX.XOTO.2126.SM.4B64U.1	Esophagus	Training Set	Normal
GTEX.S4P3.0526.SM.4AD58.1	Esophagus	Training Set	Normal
GTEX.145ME.0526.SM.5QGQV.1	Esophagus	Training Set	Normal
GTEX.11P7K.1426.SM.5EGKY.1	Esophagus	Training Set	Normal
GTEX.WXYG.1126.SM.4ONCH.1	Esophagus	Training Set	Normal
GTEX.YEC3.2526.SM.4YCDN.1	Esophagus	Training Set	Normal
GTEX.11TUW.1326.SM.5EQKV.1	Esophagus	Training Set	Normal
GTEX.117YX.1826.SM.5H12K.1	Esophagus	Training Set	Normal
GTEX.VUSG.1126.SM.4KKZQ.1	Esophagus	Training Set	Normal
GTEX.13S86.0826.SM.5SI6J.1	Esophagus	Training Set	Normal
GTEX.WYVS.1026.SM.4SOJW.1	Esophagus	Training Set	Normal
GTEX.XYKS.1526.SM.4BRUP.1	Esophagus	Training Set	Normal
GTEX.139T6.0626.SM.5IFF9.1	Esophagus	Training Set	Normal
GTEX.WHSE.1526.SM.4M1XH.1	Esophagus	Training Set	Normal
GTEX.XBED.0926.SM.48TCE.1	Esophagus	Training Set	Normal
GTEX.PLZ6.0626.SM.3P61B.1	Esophagus	Training Set	Normal
GTEX.ZVP2.1326.SM.57WCE.1	Esophagus	Training Set	Normal
GTEX.11EI6.1526.SM.5P9GL.1	Esophagus	Training Set	Normal
GTEX.WYVS.0826.SM.4RTXB.1	Esophagus	Training Set	Normal
GTEX.11EMC.2226.SM.5A5JW.1	Esophagus	Training Set	Normal
GTEX.PLZ6.0626.SM.3P61B.2	Esophagus	Training Set	Normal
GTEX.VUSG.1226.SM.4KKZF.1	Esophagus	Training Set	Normal
GTEX.UPK5.1226.SM.4IHL8.1	Esophagus	Training Set	Normal
GTEX.QXCU.1126.SM.48FE5.1	Esophagus	Training Set	Normal
GTEX.XBED.1026.SM.48TCB.1	Esophagus	Training Set	Normal
GTEX.ZYWO.0926.SM.5E43J.1	Esophagus	Training Set	Normal
GTEX.ZTSS.0726.SM.51MSN.1	Esophagus	Training Set	Normal
GTEX.Q2AH.1026.SM.48TZI.1	Esophagus	Training Set	Normal
GTEX.ZYFC.1626.SM.5N9EU.1	Esophagus	Training Set	Normal
GTEX.QV44.1126.SM.4R1KO.1	Esophagus	Training Set	Normal
GTEX.XUZC.0426.SM.4BOPE.1	Esophagus	Training Set	Normal
GTEX.RM2N.0726.SM.48FD5.1	Esophagus	Training Set	Normal
GTEX.UPIC.1026.SM.4IHLT.1	Esophagus	Training Set	Normal
GTEX.OHPL.0626.SM.3MJGJ.1	Esophagus	Training Set	Normal
GTEX.11DXY.1326.SM.5987Z.1	Esophagus	Training Set	Normal
GTEX.PLZ6.0526.SM.3P61C.1	Esophagus	Training Set	Normal
GTEX.11P82.0626.SM.5PNYK.1	Esophagus	Training Set	Normal
GTEX.XXEK.0426.SM.4BRVW.1	Esophagus	Training Set	Normal
GTEX.13NZB.1226.SM.5J2MW.1	Esophagus	Training Set	Normal
GTEX.11VI4.0526.SM.5EQ48.1	Esophagus	Training Set	Normal
GTEX.ZA64.0626.SM.5HL9O.1	Esophagus	Training Set	Normal
GTEX.XK95.1026.SM.4GIDV.1	Esophagus	Training Set	Normal
GTEX.TMMY.1226.SM.4DXT6.1	Esophagus	Training Set	Normal
GTEX.ZYW4.1326.SM.5E45N.1	Esophagus	Training Set	Normal
GTEX.PLZ6.0526.SM.3P61C.2	Esophagus	Training Set	Normal
GTEX.S32W.0926.SM.4AD5X.1	Esophagus	Training Set	Normal
GTEX.Y114.0926.SM.4TT7J.1	Esophagus	Training Set	Normal
GTEX.ZXES.1126.SM.5GZXN.1	Esophagus	Training Set	Normal
GTEX.OIZI.1426.SM.3NB1T.1	Esophagus	Training Set	Normal
GTEX.1399S.1326.SM.5P9GH.1	Esophagus	Training Set	Normal
GTEX.13FTW.1926.SM.5K7Y4.1	Esophagus	Training Set	Normal
GTEX.YECK.1626.SM.5IFHQ.1	Esophagus	Training Set	Normal
GTEX.13FH7.0526.SM.5IJF8.1	Esophagus	Training Set	Normal
GTEX.11DXX.1126.SM.5GZZK.1	Esophagus	Training Set	Normal
GTEX.WFG7.1226.SM.4LMK2.1	Esophagus	Training Set	Normal
GTEX.11ZTS.2626.SM.5EGIC.1	Esophagus	Training Set	Normal
GTEX.R55G.0926.SM.48FDN.1	Esophagus	Training Set	Normal
GTEX.RWSA.1326.SM.47JX9.1	Esophagus	Training Set	Normal
GTEX.WFJO.0826.SM.4LVM5.1	Esophagus	Training Set	Normal
GTEX.REY6.1426.SM.48FDK.1	Esophagus	Training Set	Normal
GTEX.13S86.0726.SM.5Q5DH.1	Esophagus	Training Set	Normal
GTEX.WHPG.1126.SM.4M1XT.1	Esophagus	Training Set	Normal
GTEX.ZYFG.1126.SM.5GICY.1	Esophagus	Training Set	Normal
GTEX.11UD2.1226.SM.5EQMI.1	Esophagus	Training Set	Normal
GTEX.ZY6K.0826.SM.5A5L7.1	Esophagus	Training Set	Normal
GTEX.U3ZH.1026.SM.4DXUZ.1	Esophagus	Training Set	Normal
GTEX.13113.0626.SM.5GCP2.1	Esophagus	Training Set	Normal
GTEX.QDT8.1326.SM.48TYY.1	Esophagus	Training Set	Normal
GTEX.WRHK.0426.SM.4MVOG.1	Esophagus	Training Set	Normal
GTEX.146FH.1626.SM.5NQ9H.1	Esophagus	Training Set	Normal
GTEX.11GSP.1726.SM.5A5LI.1	Esophagus	Training Set	Normal
GTEX.PX3G.0726.SM.48TZT.1	Esophagus	Training Set	Normal
GTEX.12WSL.1326.SM.5LZVW.1	Esophagus	Training Set	Normal
GTEX.132QS.1426.SM.5P9GE.1	Esophagus	Training Set	Normal
GTEX.R55D.1226.SM.48FE9.1	Esophagus	Training Set	Normal
GTEX.ZAB5.1026.SM.5HL91.1	Esophagus	Training Set	Normal
GTEX.13FLV.1226.SM.5IJBZ.1	Esophagus	Training Set	Normal
GTEX.ZPU1.1326.SM.57WE1.1	Esophagus	Training Set	Normal
GTEX.13RTK.0526.SM.5S2QF.1	Esophagus	Training Set	Normal
GTEX.SIU7.1326.SM.4BRWW.1	Esophagus	Training Set	Normal
GTEX.ZZ64.0326.SM.5E45S.1	Esophagus	Training Set	Normal
GTEX.14DAR.0726.SM.5RQIA.1	Esophagus	Training Set	Normal
GTEX.ZA64.0526.SM.5HL9I.1	Esophagus	Training Set	Normal
GTEX.XLM4.2326.SM.4TT2D.1	Esophagus	Training Set	Normal
GTEX.N7MT.0326.SM.48TDP.1	Esophagus	Training Set	Normal
GTEX.13YAN.2026.SM.5Q5EY.1	Esophagus	Training Set	Normal
GTEX.XQ8I.1626.SM.4BOOI.1	Esophagus	Training Set	Normal
GTEX.XYKS.1026.SM.4BRVH.1	Esophagus	Training Set	Normal
GTEX.WL46.1226.SM.4OOS4.1	Esophagus	Training Set	Normal
GTEX.SE5C.1226.SM.4BRWV.1	Esophagus	Training Set	Normal
GTEX.12WSD.2026.SM.5HL7D.1	Esophagus	Training Set	Normal
GTEX.ZGAY.1226.SM.4YCF4.1	Esophagus	Training Set	Normal
GTEX.YFCO.0526.SM.4W1ZJ.1	Esophagus	Training Set	Normal
GTEX.XUJ4.1126.SM.4BOPC.1	Esophagus	Training Set	Normal
GTEX.RN64.1026.SM.48FDX.1	Esophagus	Training Set	Normal
GTEX.YEC3.2526.101809.SM.5CVLT.1	Esophagus	Training Set	Normal
GTEX.WHWD.0926.SM.4OORY.1	Esophagus	Training Set	Normal
GTEX.W5WG.1626.SM.4LMKG.1	Esophagus	Training Set	Normal
GTEX.14BMU.0926.SM.5S2QB.1	Esophagus	Training Set	Normal
GTEX.P4PP.0626.SM.3NM9X.1	Esophagus	Training Set	Normal
GTEX.WFJO.0726.SM.4LVM8.1	Esophagus	Training Set	Normal
GTEX.T8EM.0526.SM.4DM64.1	Esophagus	Training Set	Normal
GTEX.ZYFC.1726.SM.5GZYX.1	Esophagus	Training Set	Normal
GTEX.T2IS.0826.SM.4DM6L.1	Esophagus	Training Set	Normal
GTEX.V955.1226.SM.4JBI9.1	Esophagus	Training Set	Normal
GTEX.R55C.0826.SM.48FCL.1	Esophagus	Training Set	Normal
GTEX.WEY5.0926.SM.4LMI4.1	Esophagus	Training Set	Normal
GTEX.O5YV.1026.SM.3LK72.1	Esophagus	Training Set	Normal
GTEX.13OW6.1426.SM.5L3EU.1	Esophagus	Training Set	Normal
GTEX.11GSP.1826.SM.5N9DQ.1	Esophagus	Training Set	Normal
GTEX.14AS3.0726.SM.5S2NY.1	Esophagus	Training Set	Normal
GTEX.ZY6K.0626.SM.59HJL.1	Esophagus	Training Set	Normal
GTEX.W5WG.1526.SM.4LMIG.1	Esophagus	Training Set	Normal
GTEX.WQUQ.1826.SM.4OOSD.1	Esophagus	Training Set	Normal
GTEX.Y5LM.1126.SM.4VDT5.1	Esophagus	Training Set	Normal
GTEX.XUW1.1526.SM.4BOOY.1	Esophagus	Training Set	Normal
GTEX.ZYY3.1526.SM.5SIA9.1	Esophagus	Training Set	Normal
GTEX.UJMC.1026.SM.4IHKN.1	Esophagus	Training Set	Normal
GTEX.13PVQ.1926.SM.5L3GN.1	Esophagus	Training Set	Normal
GTEX.13X6H.1426.SM.5SI91.1	Esophagus	Training Set	Normal
GTEX.Y3I4.1026.SM.4TT2C.1	Esophagus	Training Set	Normal
GTEX.13OVG.0926.SM.5J2OJ.1	Esophagus	Training Set	Normal
GTEX.145MN.1026.SM.5NQ9G.1	Esophagus	Training Set	Normal
GTEX.133LE.0626.SM.5IFFJ.1	Esophagus	Training Set	Normal
GTEX.11DXY.1426.SM.5N9CN.1	Esophagus	Training Set	Normal
GTEX.113JC.1026.SM.5H117.1	Esophagus	Training Set	Normal
GTEX.13111.0826.SM.5LZV3.1	Esophagus	Training Set	Normal
GTEX.111YS.0826.SM.5GZYK.1	Esophagus	Training Set	Normal
GTEX.131XF.0826.SM.5GICG.1	Esophagus	Training Set	Normal
GTEX.1399U.1026.SM.5J1OC.1	Esophagus	Training Set	Normal
GTEX.WOFM.0426.SM.4OOSG.1	Esophagus	Training Set	Normal
GTEX.146FQ.1226.SM.5QGQ4.1	Esophagus	Training Set	Normal
GTEX.ZYFG.1226.SM.5GIC7.1	Esophagus	Training Set	Normal
GTEX.U8XE.1826.SM.4E3HV.1	Esophagus	Training Set	Normal
GTEX.13YAN.1826.SM.5LU3Q.1	Esophagus	Training Set	Normal
GTEX.XQ3S.1026.SM.4BOPJ.1	Esophagus	Training Set	Normal
GTEX.13O61.0926.SM.5IFFE.1	Esophagus	Training Set	Normal
GTEX.NPJ8.2026.SM.3TW91.1	Esophagus	Training Set	Normal
GTEX.ZTTD.1426.SM.4YCEX.1	Esophagus	Training Set	Normal
GTEX.14BIN.2726.SM.5RQIE.1	Esophagus	Training Set	Normal
GTEX.Q2AI.0626.SM.48TZU.1	Esophagus	Training Set	Normal
GTEX.Y5V6.1126.SM.4VDTD.1	Esophagus	Training Set	Normal
GTEX.ZVP2.1426.SM.5NQ7P.1	Esophagus	Training Set	Normal
GTEX.11TT1.0426.SM.5EGI9.1	Esophagus	Training Set	Normal
GTEX.ZF2S.1226.SM.4WWAX.1	Esophagus	Training Set	Normal
GTEX.ZVZP.1426.SM.5NQ7R.1	Esophagus	Training Set	Normal
GTEX.13O61.1026.SM.5L3F6.1	Esophagus	Training Set	Normal
GTEX.13W46.1926.SM.5J2MF.1	Esophagus	Training Set	Normal
GTEX.11NSD.1226.SM.5986Q.1	Esophagus	Training Set	Normal
GTEX.13PVQ.1826.SM.5L3GU.1	Esophagus	Training Set	Normal
GTEX.R55D.1126.SM.48FEB.1	Esophagus	Training Set	Normal
GTEX.145ME.0626.SM.5O99Q.1	Esophagus	Training Set	Normal
GTEX.REY6.1326.SM.48FDO.1	Esophagus	Training Set	Normal
GTEX.ZDYS.0726.SM.4WKGN.1	Esophagus	Training Set	Normal
GTEX.12C56.1126.SM.5FQTO.1	Esophagus	Training Set	Normal
GTEX.WYJK.2026.SM.4ONDE.1	Esophagus	Training Set	Normal
GTEX.13QIC.2026.SM.5N9G9.1	Esophagus	Training Set	Normal
GTEX.11VI4.0826.SM.5GU5N.1	Esophagus	Training Set	Normal
GTEX.11P82.0526.SM.5986P.1	Esophagus	Training Set	Normal
GTEX.PLZ5.0826.SM.3P5ZW.1	Esophagus	Training Set	Normal
GTEX.1122O.1726.SM.5GICM.1	Esophagus	Training Set	Normal
GTEX.V955.1026.SM.4JBHO.1	Esophagus	Training Set	Normal
GTEX.13QJ3.1926.SM.5QGQM.1	Esophagus	Training Set	Normal
GTEX.11EQ9.0726.SM.5A5K2.1	Esophagus	Training Set	Normal
GTEX.V1D1.1026.SM.4JBHE.1	Esophagus	Training Set	Normal
GTEX.WZTO.1526.SM.4PQYQ.1	Esophagus	Training Set	Normal
GTEX.ZF29.1226.SM.4WKH1.1	Esophagus	Training Set	Normal
GTEX.13OW8.2326.SM.5L3I9.1	Esophagus	Training Set	Normal
GTEX.13FHP.1626.SM.5N9FK.1	Esophagus	Training Set	Normal
GTEX.PLZ5.0826.SM.3P5ZW.2	Esophagus	Training Set	Normal
GTEX.ZYY3.1626.SM.5EGJF.1	Esophagus	Training Set	Normal
GTEX.ZAK1.1826.SM.5HL93.1	Esophagus	Training Set	Normal
GTEX.UPIC.0626.SM.4IHK2.1	Esophagus	Training Set	Normal
GTEX.ZDTT.1326.SM.4WKFH.1	Esophagus	Training Set	Normal
GTEX.YB5E.1026.SM.5IFI2.1	Esophagus	Training Set	Normal
GTEX.WY7C.0826.SM.4ONCG.1	Esophagus	Training Set	Normal
GTEX.S4Q7.0526.SM.4AD5N.1	Esophagus	Training Set	Normal
GTEX.ZLWG.1226.SM.4WWFS.1	Esophagus	Training Set	Normal
GTEX.Y5LM.1226.SM.4VDT6.1	Esophagus	Training Set	Normal
GTEX.131XG.1026.SM.5GCMX.1	Esophagus	Training Set	Normal
GTEX.W5WG.2726.SM.4LMIC.1	Esophagus	Training Set	Normal
GTEX.133LE.0726.SM.5P9IZ.1	Esophagus	Training Set	Normal
GTEX.Y8LW.0726.SM.5IFI1.1	Esophagus	Training Set	Normal
GTEX.14E1K.1226.SM.5S2PD.1	Esophagus	Training Set	Normal
GTEX.11DXZ.1026.SM.5N9D5.1	Esophagus	Training Set	Normal
GTEX.13OVG.1026.SM.5KLZ3.1	Esophagus	Training Set	Normal
GTEX.11EQ9.0926.SM.5HL6I.1	Esophagus	Training Set	Normal
GTEX.146FR.0426.SM.5SI97.1	Esophagus	Training Set	Normal
GTEX.V955.1126.SM.4JBH3.1	Esophagus	Training Set	Normal
GTEX.13OVJ.1326.SM.5K7Z9.1	Esophagus	Training Set	Normal
GTEX.ZPIC.1626.SM.57WEB.1	Esophagus	Training Set	Normal
GTEX.XQ3S.1226.SM.4BOPP.1	Esophagus	Training Set	Normal
GTEX.X4XY.1726.SM.46MVO.1	Esophagus	Training Set	Normal
GTEX.1211K.1026.SM.5EQ4B.1	Esophagus	Training Set	Normal
GTEX.OXRN.1726.SM.3NM9B.1	Esophagus	Training Set	Normal
GTEX.ZYW4.1426.SM.5SIAX.1	Esophagus	Training Set	Normal
GTEX.11EM3.0726.SM.5GZZM.1	Esophagus	Training Set	Normal
GTEX.RUSQ.0926.SM.47JWU.1	Esophagus	Training Set	Normal
GTEX.Y3I4.1226.SM.4TT8N.1	Esophagus	Training Set	Normal
GTEX.S95S.0426.SM.4B64I.1	Esophagus	Training Set	Normal
GTEX.13X6H.1526.SM.5Q5E2.1	Esophagus	Training Set	Normal
GTEX.YB5K.0726.SM.5LU8R.1	Esophagus	Training Set	Normal
GTEX.PWCY.0726.SM.48TCS.1	Esophagus	Training Set	Normal
GTEX.QLQ7.1026.SM.447BB.1	Esophagus	Training Set	Normal
GTEX.OHPL.0726.SM.3TW8U.1	Esophagus	Training Set	Normal
GTEX.13N11.1226.SM.5KM4D.1	Esophagus	Training Set	Normal
GTEX.ZYFC.2226.SM.5NQ96.1	Esophagus	Training Set	Normal
GTEX.X8HC.1426.SM.46MWC.1	Esophagus	Training Set	Normal
GTEX.11OF3.2226.SM.5986F.1	Esophagus	Training Set	Normal
GTEX.X585.1226.SM.46MW7.1	Esophagus	Training Set	Normal
GTEX.U3ZN.1726.SM.4DXUQ.1	Esophagus	Training Set	Normal
GTEX.U3ZN.1826.SM.4DXUY.1	Esophagus	Training Set	Normal
GTEX.QEL4.1526.SM.447AB.1	Esophagus	Training Set	Normal
GTEX.YECK.1726.SM.5IFI3.1	Esophagus	Training Set	Normal
GTEX.11GS4.1426.SM.5N9D2.1	Esophagus	Training Set	Normal
GTEX.N7MS.1225.SM.3LK5G.1	Esophagus	Training Set	Normal
GTEX.YEC3.2526.SM.5CVLS.1	Esophagus	Training Set	Normal
GTEX.145MF.1526.SM.5LU95.1	Esophagus	Training Set	Normal
GTEX.131XE.1426.SM.5HL7V.1	Esophagus	Training Set	Normal
GTEX.11DXY.1526.SM.5H129.1	Esophagus	Training Set	Normal
GTEX.111YS.0926.SM.5EGGI.1	Esophagus	Training Set	Normal
GTEX.11DZ1.2026.SM.5A5KG.1	Esophagus	Training Set	Normal
GTEX.13O3P.2726.SM.5KM2R.1	Esophagus	Training Set	Normal
GTEX.ZXES.1226.SM.5NQ8G.1	Esophagus	Training Set	Normal
GTEX.139T6.0826.SM.5J1O2.1	Esophagus	Training Set	Normal
GTEX.145MH.1226.SM.5RQJT.1	Esophagus	Training Set	Normal
GTEX.P4PQ.0626.SM.3NMCU.1	Esophagus	Training Set	Normal
GTEX.131XE.1526.SM.5KM1A.1	Esophagus	Training Set	Normal
GTEX.WFG8.1026.SM.4LVMZ.1	Esophagus	Training Set	Normal
GTEX.Y5V6.1226.SM.4VDTE.1	Esophagus	Training Set	Normal
GTEX.UJHI.0826.SM.4IHLM.1	Esophagus	Training Set	Normal
GTEX.13SLX.1726.SM.5Q5E5.1	Esophagus	Training Set	Normal
GTEX.13O1R.1326.SM.5IJF5.1	Esophagus	Training Set	Normal
GTEX.14E6C.0926.SM.5S2V9.1	Esophagus	Training Set	Normal
GTEX.11DXZ.1226.SM.5H11L.1	Esophagus	Training Set	Normal
GTEX.145ME.0426.SM.5S2QP.1	Esophagus	Training Set	Normal
GTEX.YEC3.2326.SM.5IFJF.1	Esophagus	Training Set	Normal
GTEX.S95S.0326.SM.4B66U.1	Esophagus	Training Set	Normal
GTEX.11NUK.1326.SM.5P9GN.1	Esophagus	Training Set	Normal
GTEX.ZYVF.2326.SM.5E44Z.1	Esophagus	Training Set	Normal
GTEX.11NUK.1726.SM.5A5L2.1	Esophagus	Training Set	Normal
GTEX.QESD.0826.SM.47J4G.1	Esophagus	Training Set	Normal
GTEX.14BMU.1026.SM.5RQJ5.1	Esophagus	Training Set	Normal
GTEX.Q734.0826.SM.48U1G.1	Esophagus	Training Set	Normal
GTEX.111YS.1026.SM.5GZYE.1	Esophagus	Training Set	Normal
GTEX.WHSB.0626.SM.4M1XP.1	Esophagus	Training Set	Normal
GTEX.YEC3.1926.SM.5IFIT.1	Esophagus	Training Set	Normal
GTEX.Y3I4.0926.SM.4TT2B.1	Esophagus	Training Set	Normal
GTEX.13OW8.2426.SM.5L3ID.1	Esophagus	Training Set	Normal
GTEX.13QBU.1026.SM.5LU3R.1	Esophagus	Training Set	Normal
GTEX.Y5V5.1626.SM.4VDSG.1	Esophagus	Training Set	Normal
GTEX.1497J.2126.SM.5NQB8.1	Esophagus	Training Set	Normal
GTEX.12WSA.1426.SM.5EGJU.1	Esophagus	Training Set	Normal
GTEX.13OW7.1926.SM.5LUB4.1	Esophagus	Training Set	Normal
GTEX.14DAQ.1426.SM.5RQJD.1	Esophagus	Training Set	Normal
GTEX.11WQK.1826.SM.5EQM2.1	Esophagus	Training Set	Normal
GTEX.ZQUD.0426.SM.57WFR.1	Esophagus	Training Set	Normal
GTEX.13OVI.2526.SM.5KM4V.1	Esophagus	Training Set	Normal
GTEX.XMK1.1326.SM.4B65Q.1	Esophagus	Training Set	Normal
[truncated: 27,044 more rows]

## Sheet: Tissue Classification
Table S3 Tissue Classification of GTEx and TCGA
Sample ID	Tissue	Subtype	Dataset Spliting
GTEX.12WS9.0226.SM.5EQ4X.1	Adipose Tissue	Adipose - Subcutaneous	Training Set
GTEX.131YS.0226.SM.5IJEH.1	Adipose Tissue	Adipose - Subcutaneous	Training Set
GTEX.1211K.2226.SM.5FQU6.1	Adipose Tissue	Adipose - Subcutaneous	Training Set
GTEX.ZP4G.1326.SM.5EGIW.1	Adipose Tissue	Adipose - Visceral (Omentum)	Training Set
GTEX.133LE.1926.SM.5N9FV.1	Adipose Tissue	Adipose - Subcutaneous	Training Set
GTEX.ZVT4.0226.SM.51MSD.1	Adipose Tissue	Adipose - Subcutaneous	Training Set
GTEX.ZPCL.1026.SM.5GCOX.1	Adipose Tissue	Adipose - Visceral (Omentum)	Training Set
GTEX.ZEX8.2326.SM.5S2MN.1	Adipose Tissue	Adipose - Subcutaneous	Training Set
GTEX.12WSB.0226.SM.5GCOR.1	Adipose Tissue	Adipose - Subcutaneous	Training Set
GTEX.1128S.2126.SM.5H12U.1	Adipose Tissue	Adipose - Subcutaneous	Training Set
GTEX.132NY.1126.SM.5PNVE.1	Adipose Tissue	Adipose - Visceral (Omentum)	Training Set
GTEX.XQ8I.1426.SM.4BOPW.1	Adipose Tissue	Adipose - Visceral (Omentum)	Training Set
GTEX.WFON.1226.SM.3TW8F.1	Adipose Tissue	Adipose - Visceral (Omentum)	Training Set
GTEX.111FC.0226.SM.5N9B8.1	Adipose Tissue	Adipose - Subcutaneous	Training Set
GTEX.11ZVC.2626.SM.5FQTA.1	Adipose Tissue	Adipose - Subcutaneous	Training Set
GTEX.13OVL.0826.SM.5L3GV.1	Adipose Tissue	Adipose - Visceral (Omentum)	Training Set
GTEX.13PDP.1226.SM.5K7TW.1	Adipose Tissue	Adipose - Visceral (Omentum)	Training Set
GTEX.13FH7.2226.SM.5IJD4.1	Adipose Tissue	Adipose - Subcutaneous	Training Set
GTEX.XAJ8.0926.SM.47JXZ.1	Adipose Tissue	Adipose - Subcutaneous	Training Set
GTEX.UTHO.0426.SM.3GAED.1	Adipose Tissue	Adipose - Subcutaneous	Training Set
GTEX.ZF3C.1026.SM.5S2OC.1	Adipose Tissue	Adipose - Visceral (Omentum)	Training Set
GTEX.ZF29.2226.SM.4WWB9.1	Adipose Tissue	Adipose - Subcutaneous	Training Set
GTEX.144GM.1926.SM.5LUAN.1	Adipose Tissue	Adipose - Subcutaneous	Training Set
GTEX.T6MN.0226.SM.32PMD.1	Adipose Tissue	Adipose - Subcutaneous	Training Set
GTEX.ZYW4.0226.SM.5E44M.1	Adipose Tissue	Adipose - Subcutaneous	Training Set
GTEX.147GR.0426.SM.5S2OL.1	Adipose Tissue	Adipose - Subcutaneous	Training Set
GTEX.Y8LW.1926.SM.4WWFZ.1	Adipose Tissue	Adipose - Subcutaneous	Training Set
GTEX.13OW8.0326.SM.5L3FB.1	Adipose Tissue	Adipose - Visceral (Omentum)	Training Set
GTEX.VUSG.1426.SM.3GIJN.1	Adipose Tissue	Adipose - Visceral (Omentum)	Training Set
GTEX.13G51.2626.SM.5LZYW.1	Adipose Tissue	Adipose - Subcutaneous	Training Set
GTEX.X585.2526.SM.4QAS1.1	Adipose Tissue	Adipose - Visceral (Omentum)	Training Set
GTEX.13NYS.0226.SM.5MR49.1	Adipose Tissue	Adipose - Subcutaneous	Training Set
GTEX.145ME.0726.SM.5O9A3.1	Adipose Tissue	Adipose - Visceral (Omentum)	Training Set
GTEX.R55C.1626.SM.48FEG.1	Adipose Tissue	Adipose - Subcutaneous	Training Set
GTEX.PWOO.2226.SM.2S1P1.1	Adipose Tissue	Adipose - Subcutaneous	Training Set
GTEX.S32W.2226.SM.5S2S7.1	Adipose Tissue	Adipose - Subcutaneous	Training Set
GTEX.11O72.0226.SM.59869.1	Adipose Tissue	Adipose - Subcutaneous	Training Set
GTEX.11P81.0726.SM.5PNYH.1	Adipose Tissue	Adipose - Visceral (Omentum)	Training Set
GTEX.VUSG.2426.SM.5S2S2.1	Adipose Tissue	Adipose - Subcutaneous	Training Set
GTEX.S341.1626.SM.3K2B8.1	Adipose Tissue	Adipose - Subcutaneous	Training Set
GTEX.ZTPG.2326.SM.57WFL.1	Adipose Tissue	Adipose - Visceral (Omentum)	Training Set
GTEX.ZC5H.1626.SM.5HL7L.1	Adipose Tissue	Adipose - Visceral (Omentum)	Training Set
GTEX.Y5V5.0226.SM.5S2N8.1	Adipose Tissue	Adipose - Visceral (Omentum)	Training Set
GTEX.13NZB.2426.SM.5K7UF.1	Adipose Tissue	Adipose - Subcutaneous	Training Set
GTEX.13NZ9.0526.SM.5J1OX.1	Adipose Tissue	Adipose - Subcutaneous	Training Set
GTEX.ZZPU.2726.SM.5NQ8O.1	Adipose Tissue	Adipose - Subcutaneous	Training Set
GTEX.U4B1.1726.SM.3DB9F.1	Adipose Tissue	Adipose - Subcutaneous	Training Set
GTEX.WYVS.0626.SM.4SOJY.1	Adipose Tissue	Adipose - Visceral (Omentum)	Training Set
GTEX.ZAJG.1626.SM.5HL7I.1	Adipose Tissue	Adipose - Visceral (Omentum)	Training Set
GTEX.13RTJ.2526.SM.5S2Q3.1	Adipose Tissue	Adipose - Subcutaneous	Training Set
GTEX.ZDTS.1826.SM.5S2N6.1	Adipose Tissue	Adipose - Visceral (Omentum)	Training Set
GTEX.ZYY3.0226.SM.5E45M.1	Adipose Tissue	Adipose - Subcutaneous	Training Set
GTEX.XUJ4.1726.SM.4BONW.1	Adipose Tissue	Adipose - Visceral (Omentum)	Training Set
GTEX.13X6K.0726.SM.5LU2Z.1	Adipose Tissue	Adipose - Visceral (Omentum)	Training Set
GTEX.13FHO.0326.SM.5IJBH.1	Adipose Tissue	Adipose - Subcutaneous	Training Set
GTEX.13OW7.0226.SM.5MR3N.1	Adipose Tissue	Adipose - Subcutaneous	Training Set
GTEX.12WSA.1626.SM.5EGJV.1	Adipose Tissue	Adipose - Visceral (Omentum)	Training Set
GTEX.1399S.1426.SM.5PNYQ.1	Adipose Tissue	Adipose - Visceral (Omentum)	Training Set
GTEX.13OVJ.0926.SM.5K7U1.1	Adipose Tissue	Adipose - Visceral (Omentum)	Training Set
GTEX.T8EM.1126.SM.3DB7D.1	Adipose Tissue	Adipose - Subcutaneous	Training Set
GTEX.T5JC.0526.SM.5S2SD.1	Adipose Tissue	Adipose - Subcutaneous	Training Set
GTEX.S3XE.1626.SM.3K2AJ.1	Adipose Tissue	Adipose - Subcutaneous	Training Set
GTEX.12C56.0826.SM.5EGJ5.1	Adipose Tissue	Adipose - Visceral (Omentum)	Training Set
GTEX.11ZUS.0726.SM.59886.1	Adipose Tissue	Adipose - Subcutaneous	Training Set
GTEX.ZYVF.0226.SM.5GIEG.1	Adipose Tissue	Adipose - Subcutaneous	Training Set
GTEX.11ZU8.2426.SM.5EQMV.1	Adipose Tissue	Adipose - Subcutaneous	Training Set
GTEX.WXYG.0926.SM.3NB2O.1	Adipose Tissue	Adipose - Visceral (Omentum)	Training Set
GTEX.ZVE2.1826.SM.51MRZ.1	Adipose Tissue	Adipose - Visceral (Omentum)	Training Set
GTEX.TKQ1.1126.SM.4GIAZ.1	Adipose Tissue	Adipose - Subcutaneous	Training Set
GTEX.13FTW.0426.SM.5K7X2.1	Adipose Tissue	Adipose - Visceral (Omentum)	Training Set
GTEX.13PVR.2426.SM.5RQHN.1	Adipose Tissue	Adipose - Subcutaneous	Training Set
GTEX.ZUA1.0226.SM.5NQ9Q.1	Adipose Tissue	Adipose - Subcutaneous	Training Set
GTEX.O5YV.0226.SM.48TBY.1	Adipose Tissue	Adipose - Subcutaneous	Training Set
GTEX.ZYT6.2126.SM.5GZZ4.1	Adipose Tissue	Adipose - Visceral (Omentum)	Training Set
GTEX.XMK1.0926.SM.4B66X.1	Adipose Tissue	Adipose - Visceral (Omentum)	Training Set
GTEX.S7SE.0226.SM.2XCD4.1	Adipose Tissue	Adipose - Subcutaneous	Training Set
GTEX.14A6H.1026.SM.5SIAZ.1	Adipose Tissue	Adipose - Visceral (Omentum)	Training Set
GTEX.13D11.2326.SM.5IJCY.1	Adipose Tissue	Adipose - Subcutaneous	Training Set
GTEX.132Q8.1726.SM.5EGK8.1	Adipose Tissue	Adipose - Visceral (Omentum)	Training Set
GTEX.13O21.3126.SM.5J1OI.1	Adipose Tissue	Adipose - Visceral (Omentum)	Training Set
GTEX.1313W.0226.SM.5LZV7.1	Adipose Tissue	Adipose - Subcutaneous	Training Set
GTEX.ZZPU.0326.SM.5N9BJ.1	Adipose Tissue	Adipose - Visceral (Omentum)	Training Set
GTEX.13FTX.0626.SM.5J2NS.1	Adipose Tissue	Adipose - Visceral (Omentum)	Training Set
GTEX.QDVN.2126.SM.2I3FR.1	Adipose Tissue	Adipose - Subcutaneous	Training Set
GTEX.12ZZY.0326.SM.5LZVQ.1	Adipose Tissue	Adipose - Subcutaneous	Training Set
GTEX.P4PP.0226.SM.5S2VR.1	Adipose Tissue	Adipose - Subcutaneous	Training Set
GTEX.132AR.0226.SM.5IJBE.1	Adipose Tissue	Adipose - Subcutaneous	Training Set
GTEX.XLM4.0226.SM.4AT4N.1	Adipose Tissue	Adipose - Subcutaneous	Training Set
GTEX.XYKS.1826.SM.4E3JV.1	Adipose Tissue	Adipose - Visceral (Omentum)	Training Set
GTEX.S95S.1326.SM.2XCDK.1	Adipose Tissue	Adipose - Subcutaneous	Training Set
GTEX.Y5V6.0626.SM.4WWFY.1	Adipose Tissue	Adipose - Visceral (Omentum)	Training Set
GTEX.U8XE.0426.SM.3DB91.1	Adipose Tissue	Adipose - Subcutaneous	Training Set
GTEX.T6MN.0226.SM.5S2SO.1	Adipose Tissue	Adipose - Subcutaneous	Training Set
GTEX.11DXZ.2226.SM.5EGH2.1	Adipose Tissue	Adipose - Subcutaneous	Training Set
GTEX.S4Q7.1626.SM.3K2AE.1	Adipose Tissue	Adipose - Subcutaneous	Training Set
GTEX.ZDYS.2226.SM.5S2MI.1	Adipose Tissue	Adipose - Visceral (Omentum)	Training Set
GTEX.13OW6.2426.SM.5K7WO.1	Adipose Tissue	Adipose - Visceral (Omentum)	Training Set
GTEX.RM2N.1726.SM.2TF55.1	Adipose Tissue	Adipose - Subcutaneous	Training Set
GTEX.OHPK.0226.SM.3MJH6.1	Adipose Tissue	Adipose - Subcutaneous	Training Set
GTEX.QVJO.0226.SM.2S1R2.1	Adipose Tissue	Adipose - Subcutaneous	Training Set
GTEX.ZP4G.2326.SM.57WEM.1	Adipose Tissue	Adipose - Subcutaneous	Training Set
GTEX.ZQG8.1026.SM.51MR9.1	Adipose Tissue	Adipose - Visceral (Omentum)	Training Set
GTEX.Y9LG.1226.SM.4VBQA.1	Adipose Tissue	Adipose - Visceral (Omentum)	Training Set
GTEX.SNMC.1326.SM.2XCFK.1	Adipose Tissue	Adipose - Subcutaneous	Training Set
GTEX.QDVN.2126.SM.5SI7X.1	Adipose Tissue	Adipose - Subcutaneous	Training Set
GTEX.13IVO.2426.SM.5K7V9.1	Adipose Tissue	Adipose - Visceral (Omentum)	Training Set
GTEX.11TTK.0226.SM.5N9EC.1	Adipose Tissue	Adipose - Subcutaneous	Training Set
GTEX.P4QT.0226.SM.3LK68.1	Adipose Tissue	Adipose - Subcutaneous	Training Set
GTEX.1497J.2326.SM.5NQBK.1	Adipose Tissue	Adipose - Subcutaneous	Training Set
GTEX.ZT9X.0926.SM.5O9C4.1	Adipose Tissue	Adipose - Visceral (Omentum)	Training Set
GTEX.13RTK.0726.SM.5Q5EN.1	Adipose Tissue	Adipose - Visceral (Omentum)	Training Set
GTEX.11TT1.1926.SM.5PNYN.1	Adipose Tissue	Adipose - Visceral (Omentum)	Training Set
GTEX.12WSC.0226.SM.5EQ52.1	Adipose Tissue	Adipose - Subcutaneous	Training Set
GTEX.14C5O.0226.SM.5SI6O.1	Adipose Tissue	Adipose - Subcutaneous	Training Set
GTEX.13PL6.0926.SM.5KLYY.1	Adipose Tissue	Adipose - Visceral (Omentum)	Training Set
GTEX.PLZ6.1326.SM.3NB24.1	Adipose Tissue	Adipose - Subcutaneous	Training Set
GTEX.XGQ4.1026.SM.4AT4L.1	Adipose Tissue	Adipose - Visceral (Omentum)	Training Set
GTEX.11DXW.0326.SM.5H11W.1	Adipose Tissue	Adipose - Subcutaneous	Training Set
GTEX.14C39.2526.SM.5S2UH.1	Adipose Tissue	Adipose - Subcutaneous	Training Set
GTEX.R55F.1426.SM.2TF53.1	Adipose Tissue	Adipose - Subcutaneous	Training Set
GTEX.YECK.0226.SM.4W215.1	Adipose Tissue	Adipose - Subcutaneous	Training Set
GTEX.ZPIC.1826.SM.57WFE.1	Adipose Tissue	Adipose - Subcutaneous	Training Set
GTEX.XV7Q.1726.SM.4BRUU.1	Adipose Tissue	Adipose - Visceral (Omentum)	Training Set
GTEX.Q2AG.0226.SM.2S1P4.1	Adipose Tissue	Adipose - Subcutaneous	Training Set
GTEX.XGQ4.2226.SM.4AT4Y.1	Adipose Tissue	Adipose - Subcutaneous	Training Set
GTEX.PX3G.0226.SM.3NB2C.1	Adipose Tissue	Adipose - Subcutaneous	Training Set
GTEX.YEC3.0926.SM.5Q5AC.1	Adipose Tissue	Adipose - Visceral (Omentum)	Training Set
GTEX.Y5V5.2426.SM.5IFJA.1	Adipose Tissue	Adipose - Subcutaneous	Training Set
GTEX.YFCO.2026.SM.4W21Q.1	Adipose Tissue	Adipose - Subcutaneous	Training Set
GTEX.ZAB4.1426.SM.5CVN6.1	Adipose Tissue	Adipose - Visceral (Omentum)	Training Set
GTEX.11TUW.2626.SM.5EQKZ.1	Adipose Tissue	Adipose - Subcutaneous	Training Set
GTEX.Y111.0926.SM.4SOIU.1	Adipose Tissue	Adipose - Visceral (Omentum)	Training Set
GTEX.OXRP.0226.SM.3NB14.1	Adipose Tissue	Adipose - Subcutaneous	Training Set
GTEX.11P7K.2026.SM.5GU74.1	Adipose Tissue	Adipose - Subcutaneous	Training Set
GTEX.145MF.0526.SM.5LUA6.1	Adipose Tissue	Adipose - Subcutaneous	Training Set
GTEX.1128S.0926.SM.5GZZU.1	Adipose Tissue	Adipose - Visceral (Omentum)	Training Set
GTEX.13111.0626.SM.5LZVR.1	Adipose Tissue	Adipose - Visceral (Omentum)	Training Set
GTEX.Y111.0226.SM.4SOIW.1	Adipose Tissue	Adipose - Subcutaneous	Training Set
GTEX.13FHO.2026.SM.5J1OA.1	Adipose Tissue	Adipose - Visceral (Omentum)	Training Set
GTEX.YJ8O.2426.SM.5HL7S.1	Adipose Tissue	Adipose - Subcutaneous	Training Set
GTEX.11PRG.1526.SM.5HL6Z.1	Adipose Tissue	Adipose - Visceral (Omentum)	Training Set
GTEX.Q2AH.1726.SM.3NB2B.1	Adipose Tissue	Adipose - Subcutaneous	Training Set
GTEX.11P81.2426.SM.5GU65.1	Adipose Tissue	Adipose - Subcutaneous	Training Set
GTEX.11OF3.2426.SM.5Q5AS.1	Adipose Tissue	Adipose - Subcutaneous	Training Set
GTEX.XK95.0426.SM.4AT4R.1	Adipose Tissue	Adipose - Subcutaneous	Training Set
GTEX.ZG7Y.1626.SM.5S2NO.1	Adipose Tissue	Adipose - Visceral (Omentum)	Training Set
GTEX.1122O.2026.SM.5NQ91.1	Adipose Tissue	Adipose - Subcutaneous	Training Set
GTEX.UTHO.0426.SM.5SI7N.1	Adipose Tissue	Adipose - Subcutaneous	Training Set
GTEX.XAJ8.0226.SM.4GIB2.1	Adipose Tissue	Adipose - Visceral (Omentum)	Training Set
GTEX.13NZA.0126.SM.5K7UH.1	Adipose Tissue	Adipose - Subcutaneous	Training Set
GTEX.13NZB.0826.SM.5K7X5.1	Adipose Tissue	Adipose - Visceral (Omentum)	Training Set
GTEX.12696.2526.SM.5EQLN.1	Adipose Tissue	Adipose - Subcutaneous	Training Set
GTEX.WH7G.2226.SM.3NMBN.1	Adipose Tissue	Adipose - Subcutaneous	Training Set
GTEX.111VG.2326.SM.5N9BK.1	Adipose Tissue	Adipose - Subcutaneous	Training Set
GTEX.13S7M.0826.SM.5QGQX.1	Adipose Tissue	Adipose - Visceral (Omentum)	Training Set
GTEX.WFJO.1026.SM.3GIKL.1	Adipose Tissue	Adipose - Visceral (Omentum)	Training Set
GTEX.Y5LM.0826.SM.4VDSW.1	Adipose Tissue	Adipose - Visceral (Omentum)	Training Set
GTEX.12WSL.2426.SM.5GCN7.1	Adipose Tissue	Adipose - Subcutaneous	Training Set
GTEX.147F3.0626.SM.5NQ9I.1	Adipose Tissue	Adipose - Subcutaneous	Training Set
GTEX.ZV6S.1626.SM.5NQ81.1	Adipose Tissue	Adipose - Visceral (Omentum)	Training Set
GTEX.YF7O.2426.SM.5IFJL.1	Adipose Tissue	Adipose - Subcutaneous	Training Set
GTEX.11UD2.0126.SM.5EQL2.1	Adipose Tissue	Adipose - Subcutaneous	Training Set
GTEX.11ONC.2526.SM.5986W.1	Adipose Tissue	Adipose - Subcutaneous	Training Set
GTEX.ZTPG.0226.SM.5O99I.1	Adipose Tissue	Adipose - Subcutaneous	Training Set
GTEX.13111.1726.SM.5EGJZ.1	Adipose Tissue	Adipose - Subcutaneous	Training Set
GTEX.13W3W.1126.SM.5L3DO.1	Adipose Tissue	Adipose - Visceral (Omentum)	Training Set
GTEX.13X6I.1526.SM.5SIAC.1	Adipose Tissue	Adipose - Visceral (Omentum)	Training Set
GTEX.ZTSS.1026.SM.5985N.1	Adipose Tissue	Adipose - Visceral (Omentum)	Training Set
GTEX.QLQ7.1526.SM.2S1QA.1	Adipose Tissue	Adipose - Subcutaneous	Training Set
GTEX.111YS.1326.SM.5EGGK.1	Adipose Tissue	Adipose - Visceral (Omentum)	Training Set
GTEX.ZZ64.0626.SM.5GZWR.1	Adipose Tissue	Adipose - Visceral (Omentum)	Training Set
GTEX.11GS4.2626.SM.5A5LD.1	Adipose Tissue	Adipose - Subcutaneous	Training Set
GTEX.ZDXO.2426.SM.5S2NJ.1	Adipose Tissue	Adipose - Subcutaneous	Training Set
GTEX.13PVQ.2226.SM.5L3G9.1	Adipose Tissue	Adipose - Visceral (Omentum)	Training Set
GTEX.13YAN.0426.SM.5O9DR.1	Adipose Tissue	Adipose - Subcutaneous	Training Set
GTEX.139TT.0226.SM.5K7YH.1	Adipose Tissue	Adipose - Subcutaneous	Training Set
GTEX.13OVI.1326.SM.5IJBO.1	Adipose Tissue	Adipose - Subcutaneous	Training Set
GTEX.11DYG.2026.SM.5EGGX.1	Adipose Tissue	Adipose - Visceral (Omentum)	Training Set
GTEX.ZAJG.0226.SM.5HL81.1	Adipose Tissue	Adipose - Subcutaneous	Training Set
GTEX.13OVJ.0326.SM.5L3GL.1	Adipose Tissue	Adipose - Subcutaneous	Training Set
GTEX.ZC5H.0126.SM.4WAYL.1	Adipose Tissue	Adipose - Subcutaneous	Training Set
GTEX.UPK5.1826.SM.3GAEB.1	Adipose Tissue	Adipose - Visceral (Omentum)	Training Set
GTEX.X261.0226.SM.3NMD2.1	Adipose Tissue	Adipose - Subcutaneous	Training Set
GTEX.117YX.0726.SM.5GIET.1	Adipose Tissue	Adipose - Visceral (Omentum)	Training Set
GTEX.YJ89.1926.SM.5IFJ6.1	Adipose Tissue	Adipose - Visceral (Omentum)	Training Set
GTEX.13O3Q.1126.SM.5K7YK.1	Adipose Tissue	Adipose - Visceral (Omentum)	Training Set
GTEX.P44H.0326.SM.2XCES.1	Adipose Tissue	Adipose - Subcutaneous	Training Set
GTEX.ZYFD.1026.SM.5E43Z.1	Adipose Tissue	Adipose - Visceral (Omentum)	Training Set
GTEX.N7MS.0326.SM.4E3K2.1	Adipose Tissue	Adipose - Subcutaneous	Training Set
GTEX.XQ3S.1626.SM.4WAYN.1	Adipose Tissue	Adipose - Subcutaneous	Training Set
GTEX.12ZZW.2326.SM.5DUW2.1	Adipose Tissue	Adipose - Visceral (Omentum)	Training Set
GTEX.12ZZX.1726.SM.5BC63.1	Adipose Tissue	Adipose - Visceral (Omentum)	Training Set
GTEX.TMKS.0226.SM.3DB7X.1	Adipose Tissue	Adipose - Subcutaneous	Training Set
GTEX.13N11.2626.SM.5K7UQ.1	Adipose Tissue	Adipose - Subcutaneous	Training Set
GTEX.148VI.1726.SM.5S2W9.1	Adipose Tissue	Adipose - Subcutaneous	Training Set
GTEX.12WSD.0226.SM.59HKO.1	Adipose Tissue	Adipose - Subcutaneous	Training Set
GTEX.W5WG.2526.SM.4SOJ2.1	Adipose Tissue	Adipose - Subcutaneous	Training Set
GTEX.QV31.1326.SM.2S1QE.1	Adipose Tissue	Adipose - Subcutaneous	Training Set
GTEX.ZVZP.2326.SM.59HL4.1	Adipose Tissue	Adipose - Subcutaneous	Training Set
GTEX.111CU.1026.SM.5EGIL.1	Adipose Tissue	Adipose - Visceral (Omentum)	Training Set
GTEX.Y114.1326.SM.4TT9A.1	Adipose Tissue	Adipose - Visceral (Omentum)	Training Set
GTEX.ZYFD.0226.SM.5NQ86.1	Adipose Tissue	Adipose - Subcutaneous	Training Set
GTEX.X8HC.2326.SM.4QAS4.1	Adipose Tissue	Adipose - Visceral (Omentum)	Training Set
GTEX.144FL.0226.SM.5Q5D4.1	Adipose Tissue	Adipose - Subcutaneous	Training Set
GTEX.ZTSS.2026.SM.5987K.1	Adipose Tissue	Adipose - Subcutaneous	Training Set
GTEX.14B4R.0526.SM.5QGQT.1	Adipose Tissue	Adipose - Visceral (Omentum)	Training Set
GTEX.Z93T.0226.SM.5HL5Z.1	Adipose Tissue	Adipose - Subcutaneous	Training Set
GTEX.ZPU1.2426.SM.4WWFM.1	Adipose Tissue	Adipose - Subcutaneous	Training Set
GTEX.Q2AH.1726.SM.2S1OT.1	Adipose Tissue	Adipose - Subcutaneous	Training Set
GTEX.VJYA.1326.SM.3GIJC.1	Adipose Tissue	Adipose - Subcutaneous	Training Set
GTEX.11P82.1726.SM.5Q5AT.1	Adipose Tissue	Adipose - Subcutaneous	Training Set
GTEX.XOTO.0226.SM.4B66H.1	Adipose Tissue	Adipose - Subcutaneous	Training Set
GTEX.P4PQ.0226.SM.2S1NK.1	Adipose Tissue	Adipose - Subcutaneous	Training Set
GTEX.11NV4.1426.SM.5BC4W.1	Adipose Tissue	Adipose - Visceral (Omentum)	Training Set
GTEX.YFCO.1126.SM.5S2N9.1	Adipose Tissue	Adipose - Visceral (Omentum)	Training Set
GTEX.13D11.0526.SM.5LZYM.1	Adipose Tissue	Adipose - Visceral (Omentum)	Training Set
GTEX.REY6.0326.SM.2TF5A.1	Adipose Tissue	Adipose - Subcutaneous	Training Set
GTEX.11GSO.0226.SM.5A5LV.1	Adipose Tissue	Adipose - Visceral (Omentum)	Training Set
GTEX.QDVN.2126.SM.33HBS.1	Adipose Tissue	Adipose - Subcutaneous	Training Set
GTEX.11H98.0226.SM.5NQ89.1	Adipose Tissue	Adipose - Subcutaneous	Training Set
GTEX.139YR.0326.SM.5J1MC.1	Adipose Tissue	Adipose - Visceral (Omentum)	Training Set
GTEX.O5YT.0226.SM.32PK5.1	Adipose Tissue	Adipose - Subcutaneous	Training Set
GTEX.XBEW.1726.SM.4RGMA.1	Adipose Tissue	Adipose - Visceral (Omentum)	Training Set
GTEX.POMQ.2326.SM.5S2VS.1	Adipose Tissue	Adipose - Subcutaneous	Training Set
GTEX.13PDP.0226.SM.5K7W9.1	Adipose Tissue	Adipose - Subcutaneous	Training Set
GTEX.R53T.1626.SM.3GAEW.1	Adipose Tissue	Adipose - Subcutaneous	Training Set
GTEX.PWN1.0226.SM.2S1OZ.1	Adipose Tissue	Adipose - Subcutaneous	Training Set
GTEX.NFK9.0326.SM.3MJGV.1	Adipose Tissue	Adipose - Subcutaneous	Training Set
GTEX.11ZTT.2526.SM.5EQM9.1	Adipose Tissue	Adipose - Subcutaneous	Training Set
GTEX.12WSM.0226.SM.5LZV6.1	Adipose Tissue	Adipose - Subcutaneous	Training Set
GTEX.ZV7C.0826.SM.59HK8.1	Adipose Tissue	Adipose - Visceral (Omentum)	Training Set
GTEX.ZPU1.1226.SM.5HL71.1	Adipose Tissue	Adipose - Visceral (Omentum)	Training Set
GTEX.146FH.2026.SM.5SI9I.1	Adipose Tissue	Adipose - Visceral (Omentum)	Training Set
GTEX.S33H.1126.SM.2XCB6.1	Adipose Tissue	Adipose - Subcutaneous	Training Set
GTEX.12WSK.1026.SM.5CVNR.1	Adipose Tissue	Adipose - Visceral (Omentum)	Training Set
GTEX.11ZTS.1326.SM.5EQMA.1	Adipose Tissue	Adipose - Visceral (Omentum)	Training Set
GTEX.YB5K.2226.SM.4WWG1.1	Adipose Tissue	Adipose - Subcutaneous	Training Set
GTEX.1117F.0226.SM.5GZZ7.1	Adipose Tissue	Adipose - Subcutaneous	Training Set
GTEX.XQ8I.0526.SM.4BOPS.1	Adipose Tissue	Adipose - Subcutaneous	Training Set
GTEX.XUZC.1126.SM.4BOPZ.1	Adipose Tissue	Adipose - Visceral (Omentum)	Training Set
GTEX.113JC.0726.SM.5GZZR.1	Adipose Tissue	Adipose - Visceral (Omentum)	Training Set
GTEX.13N1W.0226.SM.5K7W6.1	Adipose Tissue	Adipose - Subcutaneous	Training Set
GTEX.ZAB5.1126.SM.5Q5AD.1	Adipose Tissue	Adipose - Visceral (Omentum)	Training Set
GTEX.Y114.2326.SM.4TT7X.1	Adipose Tissue	Adipose - Subcutaneous	Training Set
GTEX.11UD1.0226.SM.5EQKL.1	Adipose Tissue	Adipose - Subcutaneous	Training Set
GTEX.ZLWG.2226.SM.5DUWO.1	Adipose Tissue	Adipose - Subcutaneous	Training Set
GTEX.ZF2S.1526.SM.5S2OO.1	Adipose Tissue	Adipose - Visceral (Omentum)	Training Set
GTEX.QMRM.1726.SM.2S1QG.1	Adipose Tissue	Adipose - Subcutaneous	Training Set
GTEX.ZF29.0826.SM.5S2NP.1	Adipose Tissue	Adipose - Visceral (Omentum)	Training Set
GTEX.ZVZP.1126.SM.5GICU.1	Adipose Tissue	Adipose - Visceral (Omentum)	Training Set
GTEX.144GL.0226.SM.5QGOX.1	Adipose Tissue	Adipose - Subcutaneous	Training Set
GTEX.11WQK.1526.SM.5EGKN.1	Adipose Tissue	Adipose - Visceral (Omentum)	Training Set
GTEX.13W46.1226.SM.5SIAS.1	Adipose Tissue	Adipose - Visceral (Omentum)	Training Set
GTEX.WFJO.1926.SM.3GILA.1	Adipose Tissue	Adipose - Subcutaneous	Training Set
GTEX.13JUV.2826.SM.5LZWU.1	Adipose Tissue	Adipose - Subcutaneous	Training Set
GTEX.X4EO.0426.SM.4QASA.1	Adipose Tissue	Adipose - Subcutaneous	Training Set
GTEX.ZXG5.0226.SM.59HJI.1	Adipose Tissue	Adipose - Subcutaneous	Training Set
GTEX.TMZS.0226.SM.3DB9N.1	Adipose Tissue	Adipose - Subcutaneous	Training Set
GTEX.133LE.0926.SM.5P9J1.1	Adipose Tissue	Adipose - Visceral (Omentum)	Training Set
GTEX.14753.0326.SM.5QGQB.1	Adipose Tissue	Adipose - Subcutaneous	Training Set
GTEX.RTLS.0226.SM.2TF5E.1	Adipose Tissue	Adipose - Subcutaneous	Training Set
GTEX.QDVJ.1826.SM.2S1P3.1	Adipose Tissue	Adipose - Subcutaneous	Training Set
GTEX.Y8E4.1226.SM.5IFIM.1	Adipose Tissue	Adipose - Visceral (Omentum)	Training Set
GTEX.11DXX.2326.SM.5Q5A2.1	Adipose Tissue	Adipose - Subcutaneous	Training Set
GTEX.ZE9C.2826.SM.5S2MO.1	Adipose Tissue	Adipose - Subcutaneous	Training Set
GTEX.13SLW.0226.SM.5S2NA.1	Adipose Tissue	Adipose - Subcutaneous	Training Set
GTEX.13N1W.1226.SM.5K7UM.1	Adipose Tissue	Adipose - Visceral (Omentum)	Training Set
GTEX.WVJS.0226.SM.4MVOU.1	Adipose Tissue	Adipose - Subcutaneous	Training Set
GTEX.145LU.1226.SM.5LU9B.1	Adipose Tissue	Adipose - Visceral (Omentum)	Training Set
GTEX.WVLH.0226.SM.3MJG6.1	Adipose Tissue	Adipose - Subcutaneous	Training Set
GTEX.ZYVF.1026.SM.5E44V.1	Adipose Tissue	Adipose - Visceral (Omentum)	Training Set
GTEX.WI4N.1126.SM.3LK7Q.1	Adipose Tissue	Adipose - Subcutaneous	Training Set
GTEX.X62O.0226.SM.4E3JB.1	Adipose Tissue	Adipose - Subcutaneous	Training Set
GTEX.X4LF.1726.SM.3NMBZ.1	Adipose Tissue	Adipose - Subcutaneous	Training Set
GTEX.12WSG.0426.SM.5FQSE.1	Adipose Tissue	Adipose - Visceral (Omentum)	Training Set
GTEX.11ZTS.0226.SM.5EQKD.1	Adipose Tissue	Adipose - Subcutaneous	Training Set
GTEX.11EQ8.0226.SM.5EQ5G.1	Adipose Tissue	Adipose - Subcutaneous	Training Set
GTEX.145MF.1026.SM.5Q5EQ.1	Adipose Tissue	Adipose - Visceral (Omentum)	Training Set
GTEX.13NZ9.2026.SM.5KM1U.1	Adipose Tissue	Adipose - Visceral (Omentum)	Training Set
GTEX.144GN.0726.SM.5O98O.1	Adipose Tissue	Adipose - Visceral (Omentum)	Training Set
GTEX.12WSL.1126.SM.5CVNK.1	Adipose Tissue	Adipose - Visceral (Omentum)	Training Set
GTEX.ZPIC.0726.SM.57WFM.1	Adipose Tissue	Adipose - Visceral (Omentum)	Training Set
GTEX.13X6H.1726.SM.5Q5EH.1	Adipose Tissue	Adipose - Visceral (Omentum)	Training Set
GTEX.PWN1.0226.SM.5SI7O.1	Adipose Tissue	Adipose - Subcutaneous	Training Set
GTEX.T5JC.0526.SM.32PM7.1	Adipose Tissue	Adipose - Subcutaneous	Training Set
GTEX.P4PP.0226.SM.2S1NN.1	Adipose Tissue	Adipose - Subcutaneous	Training Set
GTEX.1212Z.2426.SM.5EQ5D.1	Adipose Tissue	Adipose - Subcutaneous	Training Set
GTEX.12584.0226.SM.5EQL5.1	Adipose Tissue	Adipose - Subcutaneous	Training Set
GTEX.13113.1126.SM.5LZU9.1	Adipose Tissue	Adipose - Visceral (Omentum)	Training Set
GTEX.1339X.0726.SM.5L3FF.1	Adipose Tissue	Adipose - Visceral (Omentum)	Training Set
GTEX.YEC4.2426.SM.57WFO.1	Adipose Tissue	Adipose - Subcutaneous	Training Set
GTEX.139T4.0126.SM.5HL5G.1	Adipose Tissue	Adipose - Subcutaneous	Training Set
GTEX.X638.0226.SM.47JZ9.1	Adipose Tissue	Adipose - Subcutaneous	Training Set
GTEX.11TT1.2426.SM.5EQMK.1	Adipose Tissue	Adipose - Subcutaneous	Training Set
GTEX.11EMC.2826.SM.5PNY6.1	Adipose Tissue	Adipose - Subcutaneous	Training Set
GTEX.S4Z8.1726.SM.3K2AX.1	Adipose Tissue	Adipose - Subcutaneous	Training Set
GTEX.145ME.1926.SM.5SI9S.1	Adipose Tissue	Adipose - Subcutaneous	Training Set
GTEX.ZDTS.0226.SM.5HL7Q.1	Adipose Tissue	Adipose - Subcutaneous	Training Set
GTEX.145MN.2626.SM.5NQAH.1	Adipose Tissue	Adipose - Subcutaneous	Training Set
GTEX.ZXES.2026.SM.5NQ6R.1	Adipose Tissue	Adipose - Subcutaneous	Training Set
GTEX.OHPN.0226.SM.48TBV.1	Adipose Tissue	Adipose - Subcutaneous	Training Set
GTEX.ZT9W.1026.SM.57WG5.1	Adipose Tissue	Adipose - Visceral (Omentum)	Training Set
GTEX.1117F.1326.SM.5EGHH.1	Adipose Tissue	Adipose - Visceral (Omentum)	Training Set
GTEX.14BMU.2126.SM.5S2TS.1	Adipose Tissue	Adipose - Subcutaneous	Training Set
GTEX.OHPM.0226.SM.3LK61.1	Adipose Tissue	Adipose - Subcutaneous	Training Set
GTEX.WOFM.0726.SM.3MJF8.1	Adipose Tissue	Adipose - Visceral (Omentum)	Training Set
GTEX.1192X.1526.SM.5H11I.1	Adipose Tissue	Adipose - Visceral (Omentum)	Training Set
GTEX.1399T.2726.SM.5K7XK.1	Adipose Tissue	Adipose - Subcutaneous	Training Set
GTEX.14BIN.1226.SM.5S2OM.1	Adipose Tissue	Adipose - Visceral (Omentum)	Training Set
GTEX.QEL4.0326.SM.3GAE5.1	Adipose Tissue	Adipose - Subcutaneous	Training Set
GTEX.Z9EW.0826.SM.5HL9T.1	Adipose Tissue	Adipose - Visceral (Omentum)	Training Set
GTEX.ZTX8.1526.SM.5N9GI.1	Adipose Tissue	Adipose - Subcutaneous	Training Set
GTEX.131XW.0526.SM.5PNXZ.1	Adipose Tissue	Adipose - Subcutaneous	Training Set
GTEX.ZV68.0226.SM.59HJF.1	Adipose Tissue	Adipose - Subcutaneous	Training Set
GTEX.11WQC.2426.SM.5EQKQ.1	Adipose Tissue	Adipose - Subcutaneous	Training Set
GTEX.Q2AI.1426.SM.2S1P5.1	Adipose Tissue	Adipose - Subcutaneous	Training Set
GTEX.146FR.0226.SM.5Q5F6.1	Adipose Tissue	Adipose - Visceral (Omentum)	Training Set
GTEX.11GSO.2326.SM.5A5LX.1	Adipose Tissue	Adipose - Subcutaneous	Training Set
GTEX.12ZZZ.0526.SM.5DUX6.1	Adipose Tissue	Adipose - Subcutaneous	Training Set
GTEX.11DXX.2026.SM.5EGJL.1	Adipose Tissue	Adipose - Visceral (Omentum)	Training Set
GTEX.Q734.1826.SM.2I3EL.1	Adipose Tissue	Adipose - Subcutaneous	Training Set
GTEX.QLQW.1226.SM.2S1Q9.1	Adipose Tissue	Adipose - Subcutaneous	Training Set
GTEX.132AR.0526.SM.5J2MJ.1	Adipose Tissue	Adipose - Visceral (Omentum)	Training Set
GTEX.11P82.0326.SM.5HL51.1	Adipose Tissue	Adipose - Visceral (Omentum)	Training Set
GTEX.SSA3.0226.SM.32QPN.1	Adipose Tissue	Adipose - Subcutaneous	Training Set
GTEX.XQ3S.2426.SM.4WAYB.1	Adipose Tissue	Adipose - Visceral (Omentum)	Training Set
GTEX.1211K.1226.SM.5EQ4N.1	Adipose Tissue	Adipose - Visceral (Omentum)	Training Set
GTEX.TMMY.0326.SM.33HBF.1	Adipose Tissue	Adipose - Subcutaneous	Training Set
GTEX.14E6C.0226.SM.5S2N3.1	Adipose Tissue	Adipose - Subcutaneous	Training Set
GTEX.ZXG5.1626.SM.59HJK.1	Adipose Tissue	Adipose - Visceral (Omentum)	Training Set
GTEX.145MI.0826.SM.5SI95.1	Adipose Tissue	Adipose - Visceral (Omentum)	Training Set
GTEX.XXEK.1426.SM.4BRW1.1	Adipose Tissue	Adipose - Visceral (Omentum)	Training Set
GTEX.POYW.0726.SM.2XCEO.1	Adipose Tissue	Adipose - Subcutaneous	Training Set
GTEX.12KS4.0426.SM.5EQMC.1	Adipose Tissue	Adipose - Subcutaneous	Training Set
GTEX.OXRO.0226.SM.3LK6F.1	Adipose Tissue	Adipose - Subcutaneous	Training Set
GTEX.11XUK.1726.SM.5GU61.1	Adipose Tissue	Adipose - Visceral (Omentum)	Training Set
GTEX.131XG.0126.SM.5K7UJ.1	Adipose Tissue	Adipose - Visceral (Omentum)	Training Set
GTEX.XUYS.0226.SM.47JX1.1	Adipose Tissue	Adipose - Subcutaneous	Training Set
GTEX.13O1R.0226.SM.5K7U5.1	Adipose Tissue	Adipose - Subcutaneous	Training Set
GTEX.WHPG.2126.SM.4M1ZM.1	Adipose Tissue	Adipose - Subcutaneous	Training Set
GTEX.13VXU.0226.SM.5SI9R.1	Adipose Tissue	Adipose - Subcutaneous	Training Set
GTEX.13113.1826.SM.5LZW4.1	Adipose Tissue	Adipose - Subcutaneous	Training Set
GTEX.SUCS.1826.SM.32PM1.1	Adipose Tissue	Adipose - Subcutaneous	Training Set
GTEX.13O3P.0926.SM.5IFFI.1	Adipose Tissue	Adipose - Visceral (Omentum)	Training Set
GTEX.13IVO.0226.SM.5LZXU.1	Adipose Tissue	Adipose - Subcutaneous	Training Set
GTEX.13OW8.1226.SM.5K7XD.1	Adipose Tissue	Adipose - Subcutaneous	Training Set
GTEX.12WSC.1726.SM.5GCN3.1	Adipose Tissue	Adipose - Visceral (Omentum)	Training Set
GTEX.145LT.1826.SM.5QGP4.1	Adipose Tissue	Adipose - Subcutaneous	Training Set
GTEX.OIZH.0226.SM.2YUMH.1	Adipose Tissue	Adipose - Subcutaneous	Training Set
GTEX.13VXT.0926.SM.5LU5K.1	Adipose Tissue	Adipose - Visceral (Omentum)	Training Set
GTEX.X4XY.0326.SM.46MVZ.1	Adipose Tissue	Adipose - Subcutaneous	Training Set
GTEX.ZTX8.0726.SM.59HL9.1	Adipose Tissue	Adipose - Visceral (Omentum)	Training Set
GTEX.PLZ5.1826.SM.3NB22.1	Adipose Tissue	Adipose - Subcutaneous	Training Set
GTEX.11ZUS.1826.SM.5FQTR.1	Adipose Tissue	Adipose - Visceral (Omentum)	Training Set
GTEX.ZF28.1426.SM.5S2OG.1	Adipose Tissue	Adipose - Visceral (Omentum)	Training Set
GTEX.13CF3.2326.SM.5IFGL.1	Adipose Tissue	Adipose - Subcutaneous	Training Set
GTEX.145LT.1526.SM.5O98P.1	Adipose Tissue	Adipose - Visceral (Omentum)	Training Set
GTEX.13FTY.0626.SM.5L3F8.1	Adipose Tissue	Adipose - Subcutaneous	Training Set
GTEX.ZYWO.1726.SM.5E44T.1	Adipose Tissue	Adipose - Visceral (Omentum)	Training Set
GTEX.ZVE2.0326.SM.57WFC.1	Adipose Tissue	Adipose - Subcutaneous	Training Set
GTEX.T5JW.1726.SM.3GADN.1	Adipose Tissue	Adipose - Subcutaneous	Training Set
GTEX.Y3I4.2226.SM.4TT7O.1	Adipose Tissue	Adipose - Subcutaneous	Training Set
GTEX.13112.1126.SM.5GCMY.1	Adipose Tissue	Adipose - Visceral (Omentum)	Training Set
GTEX.XOT4.0826.SM.4B66Y.1	Adipose Tissue	Adipose - Visceral (Omentum)	Training Set
GTEX.13O3Q.2326.SM.5KM3G.1	Adipose Tissue	Adipose - Subcutaneous	Training Set
GTEX.14E1K.0426.SM.5S2PF.1	Adipose Tissue	Adipose - Visceral (Omentum)	Training Set
GTEX.ZVZQ.0426.SM.59HLT.1	Adipose Tissue	Adipose - Subcutaneous	Training Set
GTEX.Z9EW.1826.SM.5CVMA.1	Adipose Tissue	Adipose - Subcutaneous	Training Set
GTEX.WY7C.2426.SM.3NB2V.1	Adipose Tissue	Adipose - Subcutaneous	Training Set
GTEX.11EQ9.1126.SM.5987I.1	Adipose Tissue	Adipose - Visceral (Omentum)	Training Set
GTEX.12C56.1626.SM.5FQUO.1	Adipose Tissue	Adipose - Subcutaneous	Training Set
GTEX.XLM4.0226.SM.5S2TL.1	Adipose Tissue	Adipose - Subcutaneous	Training Set
GTEX.OOBJ.0226.SM.2YUMM.1	Adipose Tissue	Adipose - Subcutaneous	Training Set
GTEX.X8HC.0226.SM.4E3K1.1	Adipose Tissue	Adipose - Subcutaneous	Training Set
GTEX.S4P3.1526.SM.3K2AV.1	Adipose Tissue	Adipose - Subcutaneous	Training Set
GTEX.13PLJ.0126.SM.5L3HU.1	Adipose Tissue	Adipose - Subcutaneous	Training Set
GTEX.13NYS.0726.SM.5J1OR.1	Adipose Tissue	Adipose - Visceral (Omentum)	Training Set
GTEX.13FTW.2526.SM.5IJC8.1	Adipose Tissue	Adipose - Subcutaneous	Training Set
GTEX.146FH.0226.SM.5QGPQ.1	Adipose Tissue	Adipose - Subcutaneous	Training Set
GTEX.111YS.2426.SM.5GZZQ.1	Adipose Tissue	Adipose - Subcutaneous	Training Set
GTEX.ZYWO.2526.SM.5GIDM.1	Adipose Tissue	Adipose - Subcutaneous	Training Set
GTEX.NL3G.0226.SM.4RGLU.1	Adipose Tissue	Adipose - Subcutaneous	Training Set
GTEX.139T6.2126.SM.5KM37.1	Adipose Tissue	Adipose - Subcutaneous	Training Set
GTEX.13FH7.1926.SM.5J2OL.1	Adipose Tissue	Adipose - Visceral (Omentum)	Training Set
GTEX.OIZI.0226.SM.2XCEE.1	Adipose Tissue	Adipose - Subcutaneous	Training Set
GTEX.UJHI.1626.SM.3DB9A.1	Adipose Tissue	Adipose - Subcutaneous	Training Set
GTEX.13QBU.2526.SM.5LU4X.1	Adipose Tissue	Adipose - Subcutaneous	Training Set
GTEX.Y8LW.0926.SM.4VBQ8.1	Adipose Tissue	Adipose - Visceral (Omentum)	Training Set
GTEX.13S7M.0226.SM.5S2UG.1	Adipose Tissue	Adipose - Subcutaneous	Training Set
GTEX.WEY5.1926.SM.3GIL8.1	Adipose Tissue	Adipose - Subcutaneous	Training Set
GTEX.1399U.2426.SM.5K7XB.1	Adipose Tissue	Adipose - Subcutaneous	Training Set
GTEX.PX3G.0226.SM.2S1OU.1	Adipose Tissue	Adipose - Subcutaneous	Training Set
GTEX.P4QR.0426.SM.2S1NV.1	Adipose Tissue	Adipose - Subcutaneous	Training Set
GTEX.WFON.2226.SM.3TW8W.1	Adipose Tissue	Adipose - Subcutaneous	Training Set
GTEX.11OF3.0826.SM.5BC51.1	Adipose Tissue	Adipose - Visceral (Omentum)	Training Set
GTEX.OXRK.0326.SM.3NB3R.1	Adipose Tissue	Adipose - Subcutaneous	Training Set
GTEX.14ICL.0926.SM.5S2TU.1	Adipose Tissue	Adipose - Visceral (Omentum)	Training Set
GTEX.145LS.0226.SM.5O9A5.1	Adipose Tissue	Adipose - Subcutaneous	Training Set
GTEX.QCQG.1826.SM.2S1P2.1	Adipose Tissue	Adipose - Subcutaneous	Training Set
GTEX.12ZZX.0226.SM.5DUXU.1	Adipose Tissue	Adipose - Subcutaneous	Training Set
GTEX.1314G.1626.SM.5EQ67.1	Adipose Tissue	Adipose - Subcutaneous	Training Set
GTEX.U8T8.0226.SM.3DB97.1	Adipose Tissue	Adipose - Subcutaneous	Training Set
GTEX.ZVZO.0226.SM.5A5LA.1	Adipose Tissue	Adipose - Subcutaneous	Training Set
GTEX.WYBS.1026.SM.4ONCY.1	Adipose Tissue	Adipose - Visceral (Omentum)	Training Set
GTEX.ZLV1.0926.SM.5S2MR.1	Adipose Tissue	Adipose - Visceral (Omentum)	Training Set
GTEX.W5X1.1426.SM.3GIKH.1	Adipose Tissue	Adipose - Visceral (Omentum)	Training Set
GTEX.11XUK.2126.SM.5EQLR.1	Adipose Tissue	Adipose - Subcutaneous	Training Set
GTEX.WYJK.1426.SM.3NM8V.1	Adipose Tissue	Adipose - Visceral (Omentum)	Training Set
GTEX.13VXT.0226.SM.5LU9Q.1	Adipose Tissue	Adipose - Subcutaneous	Training Set
GTEX.131XH.0826.SM.5GCN8.1	Adipose Tissue	Adipose - Visceral (Omentum)	Training Set
GTEX.11ILO.0226.SM.5N9D3.1	Adipose Tissue	Adipose - Subcutaneous	Training Set
GTEX.ZF3C.0226.SM.4WWB3.1	Adipose Tissue	Adipose - Subcutaneous	Training Set
GTEX.13W3W.2526.SM.5SI9P.1	Adipose Tissue	Adipose - Subcutaneous	Training Set
GTEX.13OVL.0326.SM.5IJCS.1	Adipose Tissue	Adipose - Subcutaneous	Training Set
GTEX.ZVT2.2226.SM.5NQ6P.1	Adipose Tissue	Adipose - Subcutaneous	Training Set
GTEX.PLZ4.0226.SM.5SI7M.1	Adipose Tissue	Adipose - Subcutaneous	Training Set
GTEX.145LV.1026.SM.5O9AE.1	Adipose Tissue	Adipose - Visceral (Omentum)	Training Set
GTEX.14BMV.0226.SM.5S2N2.1	Adipose Tissue	Adipose - Subcutaneous	Training Set
GTEX.X3Y1.0926.SM.3P5YT.1	Adipose Tissue	Adipose - Visceral (Omentum)	Training Set
GTEX.XBED.2326.SM.47JYR.1	Adipose Tissue	Adipose - Subcutaneous	Training Set
GTEX.XBED.1326.SM.4AT4F.1	Adipose Tissue	Adipose - Visceral (Omentum)	Training Set
GTEX.145MI.0426.SM.5O99V.1	Adipose Tissue	Adipose - Subcutaneous	Training Set
GTEX.1399R.2626.SM.5KLZ7.1	Adipose Tissue	Adipose - Subcutaneous	Training Set
GTEX.TML8.2026.SM.32QOP.1	Adipose Tissue	Adipose - Subcutaneous	Training Set
GTEX.139TU.1426.SM.5LZY9.1	Adipose Tissue	Adipose - Visceral (Omentum)	Training Set
GTEX.S32W.2226.SM.2XCAY.1	Adipose Tissue	Adipose - Subcutaneous	Training Set
GTEX.11DZ1.0226.SM.5A5KF.1	Adipose Tissue	Adipose - Subcutaneous	Training Set
GTEX.Y8E5.0226.SM.57WCM.1	Adipose Tissue	Adipose - Subcutaneous	Training Set
GTEX.RWSA.0226.SM.2XCBA.1	Adipose Tissue	Adipose - Subcutaneous	Training Set
GTEX.1269C.2726.SM.5EGJ4.1	Adipose Tissue	Adipose - Subcutaneous	Training Set
GTEX.11GS4.1026.SM.5N9DE.1	Adipose Tissue	Adipose - Visceral (Omentum)	Training Set
GTEX.QEG4.0326.SM.5S2UQ.1	Adipose Tissue	Adipose - Subcutaneous	Training Set
GTEX.PWCY.1926.SM.3NB25.1	Adipose Tissue	Adipose - Subcutaneous	Training Set
GTEX.14AS3.0426.SM.5QGQK.1	Adipose Tissue	Adipose - Visceral (Omentum)	Training Set
GTEX.OOBK.0226.SM.2YUMF.1	Adipose Tissue	Adipose - Subcutaneous	Training Set
GTEX.XBEW.0726.SM.4QARX.1	Adipose Tissue	Adipose - Subcutaneous	Training Set
GTEX.12584.2126.SM.5FQUM.1	Adipose Tissue	Adipose - Visceral (Omentum)	Training Set
GTEX.146FR.1826.SM.5QGPF.1	Adipose Tissue	Adipose - Subcutaneous	Training Set
GTEX.13QBU.1326.SM.5LU4K.1	Adipose Tissue	Adipose - Visceral (Omentum)	Training Set
GTEX.ZLV1.1826.SM.5FQU5.1	Adipose Tissue	Adipose - Subcutaneous	Training Set
GTEX.XUZC.1826.SM.4BRVO.1	Adipose Tissue	Adipose - Subcutaneous	Training Set
GTEX.YECK.1426.SM.5IFHE.1	Adipose Tissue	Adipose - Visceral (Omentum)	Training Set
GTEX.12126.0426.SM.5Q5AP.1	Adipose Tissue	Adipose - Subcutaneous	Training Set
GTEX.13N2G.2726.SM.5J1MG.1	Adipose Tissue	Adipose - Subcutaneous	Training Set
GTEX.XBEC.0326.SM.4AT4M.1	Adipose Tissue	Adipose - Subcutaneous	Training Set
GTEX.ZEX8.1226.SM.5S2OK.1	Adipose Tissue	Adipose - Visceral (Omentum)	Training Set
GTEX.13OW6.0526.SM.5L3HY.1	Adipose Tissue	Adipose - Subcutaneous	Training Set
GTEX.11LCK.1126.SM.5A5KC.1	Adipose Tissue	Adipose - Subcutaneous	Training Set
GTEX.XYKS.2726.SM.4E3IC.1	Adipose Tissue	Adipose - Subcutaneous	Training Set
GTEX.Y3IK.2526.SM.4WWDM.1	Adipose Tissue	Adipose - Subcutaneous	Training Set
GTEX.R55D.0326.SM.48FES.1	Adipose Tissue	Adipose - Subcutaneous	Training Set
GTEX.ZVTK.0526.SM.5GZWT.1	Adipose Tissue	Adipose - Subcutaneous	Training Set
GTEX.ZXES.0926.SM.5E43O.1	Adipose Tissue	Adipose - Visceral (Omentum)	Training Set
GTEX.131XF.2226.SM.5EQKG.1	Adipose Tissue	Adipose - Subcutaneous	Training Set
GTEX.139D8.0326.SM.5IJCJ.1	Adipose Tissue	Adipose - Subcutaneous	Training Set
GTEX.13FHP.0226.SM.5K7WD.1	Adipose Tissue	Adipose - Subcutaneous	Training Set
GTEX.VUSG.2426.SM.4KKZG.1	Adipose Tissue	Adipose - Subcutaneous	Training Set
GTEX.13SLX.0426.SM.5QGRC.1	Adipose Tissue	Adipose - Subcutaneous	Training Set
GTEX.XXEK.2426.SM.5S2S8.1	Adipose Tissue	Adipose - Subcutaneous	Training Set
GTEX.13G51.0526.SM.5IJCQ.1	Adipose Tissue	Adipose - Visceral (Omentum)	Training Set
GTEX.ZZ64.1626.SM.5E43W.1	Adipose Tissue	Adipose - Subcutaneous	Training Set
GTEX.13X6K.0226.SM.5QGPB.1	Adipose Tissue	Adipose - Subcutaneous	Training Set
GTEX.139YR.2426.SM.5J1OB.1	Adipose Tissue	Adipose - Subcutaneous	Training Set
GTEX.13N11.1826.SM.5IJDS.1	Adipose Tissue	Adipose - Visceral (Omentum)	Training Set
GTEX.ZA64.0926.SM.5HL7H.1	Adipose Tissue	Adipose - Visceral (Omentum)	Training Set
GTEX.R55G.2426.SM.2TC5I.1	Adipose Tissue	Adipose - Subcutaneous	Training Set
GTEX.YFC4.0226.SM.57WD2.1	Adipose Tissue	Adipose - Subcutaneous	Training Set
GTEX.P44G.2326.SM.2XCCZ.1	Adipose Tissue	Adipose - Subcutaneous	Training Set
GTEX.POMQ.2326.SM.2S1O8.1	Adipose Tissue	Adipose - Subcutaneous	Training Set
GTEX.XXEK.2426.SM.4BRUS.1	Adipose Tissue	Adipose - Subcutaneous	Training Set
GTEX.111CU.1826.SM.5GZYN.1	Adipose Tissue	Adipose - Subcutaneous	Training Set
GTEX.11EQ9.2526.SM.5HL66.1	Adipose Tissue	Adipose - Subcutaneous	Training Set
GTEX.YJ8A.0526.SM.5IFHT.1	Adipose Tissue	Adipose - Subcutaneous	Training Set
GTEX.WHWD.0826.SM.3LK6R.1	Adipose Tissue	Adipose - Visceral (Omentum)	Training Set
GTEX.ZGAY.1326.SM.5S2NS.1	Adipose Tissue	Adipose - Visceral (Omentum)	Training Set
GTEX.P4QS.0226.SM.3NB1U.1	Adipose Tissue	Adipose - Subcutaneous	Training Set
GTEX.SJXC.0226.SM.2XCDU.1	Adipose Tissue	Adipose - Subcutaneous	Training Set
GTEX.X5EB.2426.SM.4E3HX.1	Adipose Tissue	Adipose - Subcutaneous	Training Set
GTEX.13PL7.1226.SM.5SIAR.1	Adipose Tissue	Adipose - Visceral (Omentum)	Training Set
GTEX.ZUA1.2126.SM.57YRB.1	Adipose Tissue	Adipose - Visceral (Omentum)	Training Set
GTEX.ZQG8.1526.SM.5HL65.1	Adipose Tissue	Adipose - Subcutaneous	Training Set
GTEX.11EM3.1126.SM.5A5KM.1	Adipose Tissue	Adipose - Visceral (Omentum)	Training Set
GTEX.XUW1.0526.SM.4BOP3.1	Adipose Tissue	Adipose - Subcutaneous	Training Set
GTEX.WY7C.0926.SM.3NB34.1	Adipose Tissue	Adipose - Visceral (Omentum)	Training Set
GTEX.ZAK1.0226.SM.5CVMX.1	Adipose Tissue	Adipose - Subcutaneous	Training Set
GTEX.Y3I4.0726.SM.4TT7M.1	Adipose Tissue	Adipose - Visceral (Omentum)	Training Set
GTEX.Y8E4.0726.SM.4WWFN.1	Adipose Tissue	Adipose - Subcutaneous	Training Set
GTEX.PLZ4.0226.SM.2S1NW.1	Adipose Tissue	Adipose - Subcutaneous	Training Set
GTEX.13CF3.1126.SM.5LZXB.1	Adipose Tissue	Adipose - Visceral (Omentum)	Training Set
GTEX.11EI6.0226.SM.5EQ64.1	Adipose Tissue	Adipose - Subcutaneous	Training Set
GTEX.12696.1826.SM.5EGJS.1	Adipose Tissue	Adipose - Visceral (Omentum)	Training Set
GTEX.13VXU.1026.SM.5KLZE.1	Adipose Tissue	Adipose - Visceral (Omentum)	Training Set
GTEX.ZE7O.1526.SM.5J1NH.1	Adipose Tissue	Adipose - Visceral (Omentum)	Training Set
GTEX.146FQ.0226.SM.5NQAL.1	Adipose Tissue	Adipose - Subcutaneous	Training Set
GTEX.12BJ1.0826.SM.5EQ5P.1	Adipose Tissue	Adipose - Visceral (Omentum)	Training Set
GTEX.13O3P.0226.SM.5KM3Z.1	Adipose Tissue	Adipose - Subcutaneous	Training Set
GTEX.13U4I.1726.SM.5J1MF.1	Adipose Tissue	Adipose - Visceral (Omentum)	Training Set
GTEX.ZDTT.2626.SM.5S2OP.1	Adipose Tissue	Adipose - Subcutaneous	Training Set
GTEX.11P7K.0826.SM.5BC5F.1	Adipose Tissue	Adipose - Visceral (Omentum)	Training Set
GTEX.OXRP.0226.SM.48TDH.1	Adipose Tissue	Adipose - Subcutaneous	Training Set
GTEX.P78B.0226.SM.3NB1Z.1	Adipose Tissue	Adipose - Subcutaneous	Training Set
GTEX.QV44.1825.SM.447CF.1	Adipose Tissue	Adipose - Subcutaneous	Training Set
GTEX.ZLWG.0726.SM.5S2NG.1	Adipose Tissue	Adipose - Visceral (Omentum)	Training Set
GTEX.12WSM.0626.SM.5GCOK.1	Adipose Tissue	Adipose - Visceral (Omentum)	Training Set
GTEX.11EM3.2326.SM.5H12B.1	Adipose Tissue	Adipose - Subcutaneous	Training Set
GTEX.SIU8.0226.SM.2XCDS.1	Adipose Tissue	Adipose - Subcutaneous	Training Set
GTEX.11PRG.0626.SM.5BC56.1	Adipose Tissue	Adipose - Subcutaneous	Training Set
GTEX.WEY5.1326.SM.3GILS.1	Adipose Tissue	Adipose - Visceral (Omentum)	Training Set
GTEX.13OVG.1326.SM.5K7Y3.1	Adipose Tissue	Adipose - Visceral (Omentum)	Training Set
GTEX.117YW.0826.SM.5H11O.1	Adipose Tissue	Adipose - Visceral (Omentum)	Training Set
GTEX.U412.0526.SM.3DB9I.1	Adipose Tissue	Adipose - Subcutaneous	Training Set
GTEX.13CF2.2626.SM.5LZZA.1	Adipose Tissue	Adipose - Subcutaneous	Training Set
GTEX.1122O.0926.SM.5N9C9.1	Adipose Tissue	Adipose - Visceral (Omentum)	Training Set
GTEX.13OW7.1126.SM.5K7V6.1	Adipose Tissue	Adipose - Visceral (Omentum)	Training Set
GTEX.XMK1.2226.SM.4B673.1	Adipose Tissue	Adipose - Subcutaneous	Training Set
GTEX.X88G.0226.SM.4GIE4.1	Adipose Tissue	Adipose - Subcutaneous	Training Set
GTEX.S7SF.1826.SM.3K2AD.1	Adipose Tissue	Adipose - Subcutaneous	Training Set
GTEX.WHPG.0626.SM.3NMBD.1	Adipose Tissue	Adipose - Visceral (Omentum)	Training Set
GTEX.113IC.0226.SM.5HL5C.1	Adipose Tissue	Adipose - Subcutaneous	Training Set
GTEX.RU72.1026.SM.46MUG.1	Adipose Tissue	Adipose - Subcutaneous	Training Set
GTEX.12WSI.1526.SM.5GCNM.1	Adipose Tissue	Adipose - Visceral (Omentum)	Training Set
GTEX.ZVT2.0226.SM.5GIE3.1	Adipose Tissue	Adipose - Visceral (Omentum)	Training Set
GTEX.ZDXO.2326.SM.5LU9W.1	Adipose Tissue	Adipose - Visceral (Omentum)	Training Set
GTEX.13O21.1526.SM.5K7W4.1	Adipose Tissue	Adipose - Subcutaneous	Training Set
GTEX.13QJ3.0426.SM.5RQHP.1	Adipose Tissue	Adipose - Subcutaneous	Training Set
GTEX.ZE9C.1326.SM.5S2OW.1	Adipose Tissue	Adipose - Visceral (Omentum)	Training Set
GTEX.139D8.1626.SM.5IJFZ.1	Adipose Tissue	Adipose - Visceral (Omentum)	Training Set
GTEX.XLM4.1026.SM.4AT51.1	Adipose Tissue	Adipose - Visceral (Omentum)	Training Set
GTEX.14DAQ.2526.SM.5RQIO.1	Adipose Tissue	Adipose - Visceral (Omentum)	Training Set
GTEX.ZQUD.0526.SM.57WG4.1	Adipose Tissue	Adipose - Visceral (Omentum)	Training Set
GTEX.ZVP2.0226.SM.57WBD.1	Adipose Tissue	Adipose - Visceral (Omentum)	Training Set
GTEX.1399T.1326.SM.5PNVH.1	Adipose Tissue	Adipose - Visceral (Omentum)	Training Set
GTEX.XPVG.2726.SM.4B66W.1	Adipose Tissue	Adipose - Subcutaneous	Training Set
GTEX.131YS.1726.SM.5HL7G.1	Adipose Tissue	Adipose - Visceral (Omentum)	Training Set
GTEX.U8XE.1926.SM.3DB98.1	Adipose Tissue	Adipose - Visceral (Omentum)	Training Set
GTEX.11LCK.0326.SM.5A5M7.1	Adipose Tissue	Adipose - Visceral (Omentum)	Training Set
GTEX.ZYFG.1426.SM.5GICS.1	Adipose Tissue	Adipose - Visceral (Omentum)	Training Set
GTEX.TSE9.0226.SM.3DB84.1	Adipose Tissue	Adipose - Subcutaneous	Training Set
GTEX.131XF.0726.SM.5GIE5.1	Adipose Tissue	Adipose - Visceral (Omentum)	Training Set
GTEX.WL46.2026.SM.3LK7U.1	Adipose Tissue	Adipose - Visceral (Omentum)	Training Set
GTEX.WL46.0326.SM.3LK6Y.1	Adipose Tissue	Adipose - Subcutaneous	Training Set
GTEX.13O61.1926.SM.5KM1R.1	Adipose Tissue	Adipose - Visceral (Omentum)	Training Set
GTEX.11I78.2626.SM.5Q5AI.1	Adipose Tissue	Adipose - Subcutaneous	Training Set
GTEX.11DXY.0326.SM.5H12F.1	Adipose Tissue	Adipose - Visceral (Omentum)	Training Set
GTEX.S4UY.0226.SM.3K2AP.1	Adipose Tissue	Adipose - Subcutaneous	Training Set
GTEX.111FC.1426.SM.5N9C7.1	Adipose Tissue	Adipose - Subcutaneous	Training Set
GTEX.13NZ8.0926.SM.5MR3U.1	Adipose Tissue	Adipose - Subcutaneous	Training Set
GTEX.T6MO.1726.SM.33HB8.1	Adipose Tissue	Adipose - Subcutaneous	Training Set
GTEX.NPJ8.0226.SM.48TBN.1	Adipose Tissue	Adipose - Subcutaneous	Training Set
GTEX.14BIL.2426.SM.5QGQR.1	Adipose Tissue	Adipose - Visceral (Omentum)	Training Set
GTEX.1313W.1626.SM.5J1OE.1	Adipose Tissue	Adipose - Visceral (Omentum)	Training Set
GTEX.RVPU.2326.SM.2TF6R.1	Adipose Tissue	Adipose - Subcutaneous	Training Set
GTEX.145MO.0426.SM.5QGP6.1	Adipose Tissue	Adipose - Subcutaneous	Training Set
GTEX.Z93S.0226.SM.5HL7R.1	Adipose Tissue	Adipose - Subcutaneous	Training Set
GTEX.13PVQ.0226.SM.5SIBG.1	Adipose Tissue	Adipose - Subcutaneous	Training Set
GTEX.ZE7O.0226.SM.5S2N1.1	Adipose Tissue	Adipose - Subcutaneous	Training Set
GTEX.14753.2526.SM.5LU97.1	Adipose Tissue	Adipose - Visceral (Omentum)	Training Set
GTEX.XBEC.1826.SM.4QASN.1	Adipose Tissue	Adipose - Visceral (Omentum)	Training Set
GTEX.QESD.1526.SM.2S1QT.1	Adipose Tissue	Adipose - Subcutaneous	Training Set
GTEX.ZVP2.1826.SM.5GU62.1	Adipose Tissue	Adipose - Subcutaneous	Training Set
GTEX.YEC3.1226.SM.5IFI8.1	Adipose Tissue	Adipose - Subcutaneous	Training Set
GTEX.Y5V6.2526.SM.5IFJV.1	Adipose Tissue	Adipose - Subcutaneous	Training Set
GTEX.131XE.2026.SM.5LZW1.1	Adipose Tissue	Adipose - Visceral (Omentum)	Training Set
GTEX.XMD2.0226.SM.4WWEE.1	Adipose Tissue	Adipose - Subcutaneous	Training Set
GTEX.1212Z.0526.SM.5FQSQ.1	Adipose Tissue	Adipose - Visceral (Omentum)	Training Set
GTEX.11I78.0226.SM.5HL6R.1	Adipose Tissue	Adipose - Visceral (Omentum)	Training Set
GTEX.139T6.0526.SM.5IJC9.1	Adipose Tissue	Adipose - Visceral (Omentum)	Training Set
GTEX.YJ89.0226.SM.4TT3Y.1	Adipose Tissue	Adipose - Subcutaneous	Training Set
GTEX.ZF28.0226.SM.5S2OE.1	Adipose Tissue	Adipose - Subcutaneous	Training Set
GTEX.13N2G.1926.SM.5J1O3.1	Adipose Tissue	Adipose - Visceral (Omentum)	Training Set
GTEX.11DXZ.1426.SM.5H12A.1	Adipose Tissue	Adipose - Visceral (Omentum)	Training Set
GTEX.13112.2726.SM.5DUW5.1	Adipose Tissue	Adipose - Subcutaneous	Training Set
GTEX.WWTW.1326.SM.4MVNT.1	Adipose Tissue	Adipose - Visceral (Omentum)	Training Set
GTEX.ZYFC.1826.SM.5GZZA.1	Adipose Tissue	Adipose - Visceral (Omentum)	Training Set
GTEX.ZT9X.1926.SM.57WE7.1	Adipose Tissue	Adipose - Subcutaneous	Training Set
GTEX.147JS.1026.SM.5S2MP.1	Adipose Tissue	Adipose - Visceral (Omentum)	Training Set
GTEX.X15G.2326.SM.4PQZS.1	Adipose Tissue	Adipose - Subcutaneous	Training Set
GTEX.12WSA.0326.SM.5BC6I.1	Adipose Tissue	Adipose - Subcutaneous	Training Set
GTEX.OXRK.0326.SM.2YUMQ.1	Adipose Tissue	Adipose - Subcutaneous	Training Set
GTEX.132QS.0826.SM.5K7WV.1	Adipose Tissue	Adipose - Visceral (Omentum)	Training Set
GTEX.ZYFC.0326.SM.5NQ7H.1	Adipose Tissue	Adipose - Subcutaneous	Training Set
GTEX.12KS4.1526.SM.5EQ6E.1	Adipose Tissue	Adipose - Visceral (Omentum)	Training Set
GTEX.U3ZN.2626.SM.3DB7T.1	Adipose Tissue	Adipose - Subcutaneous	Training Set
GTEX.YB5E.2126.SM.5IFI7.1	Adipose Tissue	Adipose - Subcutaneous	Training Set
GTEX.13PVR.0526.SM.5S2OB.1	Adipose Tissue	Adipose - Visceral (Omentum)	Training Set
GTEX.139TU.0226.SM.5J1NM.1	Adipose Tissue	Adipose - Subcutaneous	Training Set
GTEX.13JUV.0626.SM.5J1MQ.1	Adipose Tissue	Adipose - Visceral (Omentum)	Training Set
GTEX.ZDTT.0526.SM.5HL4M.1	Adipose Tissue	Adipose - Visceral (Omentum)	Training Set
GTEX.13U4I.0226.SM.5SIB1.1	Adipose Tissue	Adipose - Subcutaneous	Training Set
GTEX.WH7G.1126.SM.3NMBK.1	Adipose Tissue	Adipose - Visceral (Omentum)	Training Set
GTEX.W5X1.2626.SM.4LMI8.1	Adipose Tissue	Adipose - Subcutaneous	Training Set
GTEX.13S86.0926.SM.5SI6I.1	Adipose Tissue	Adipose - Visceral (Omentum)	Training Set
GTEX.13OVH.1126.SM.5K7YP.1	Adipose Tissue	Adipose - Visceral (Omentum)	Training Set
GTEX.13O61.2426.SM.5J1NV.1	Adipose Tissue	Adipose - Subcutaneous	Training Set
GTEX.QEG5.0326.SM.2S1PB.1	Adipose Tissue	Adipose - Subcutaneous	Training Set
GTEX.ZPCL.2126.SM.57WFZ.1	Adipose Tissue	Adipose - Subcutaneous	Training Set
GTEX.SN8G.0226.SM.4DM6B.1	Adipose Tissue	Adipose - Subcutaneous	Training Set
GTEX.WK11.2426.SM.3NMAA.1	Adipose Tissue	Adipose - Visceral (Omentum)	Training Set
GTEX.WFG8.2326.SM.5S2UE.1	Adipose Tissue	Adipose - Subcutaneous	Training Set
GTEX.139T8.0226.SM.5L3EA.1	Adipose Tissue	Adipose - Subcutaneous	Training Set
GTEX.XV7Q.2626.SM.4BRVA.1	Adipose Tissue	Adipose - Subcutaneous	Training Set
GTEX.WRHK.0826.SM.3MJFG.1	Adipose Tissue	Adipose - Visceral (Omentum)	Training Set
GTEX.WFG8.2326.SM.3GILF.1	Adipose Tissue	Adipose - Subcutaneous	Training Set
GTEX.OXRL.0226.SM.3NB18.1	Adipose Tissue	Adipose - Subcutaneous	Training Set
GTEX.117YX.2226.SM.5EGJJ.1	Adipose Tissue	Adipose - Subcutaneous	Training Set
GTEX.11NUK.2026.SM.5PNVZ.1	Adipose Tissue	Adipose - Visceral (Omentum)	Training Set
GTEX.YEC4.0926.SM.5PNXY.1	Adipose Tissue	Adipose - Visceral (Omentum)	Training Set
GTEX.OXRN.0226.SM.2I5EJ.1	Adipose Tissue	Adipose - Subcutaneous	Training Set
GTEX.QDT8.0226.SM.32PL4.1	Adipose Tissue	Adipose - Subcutaneous	Training Set
GTEX.14DAR.1926.SM.5S2NQ.1	Adipose Tissue	Adipose - Subcutaneous	Training Set
GTEX.XUJ4.2526.SM.4BOO4.1	Adipose Tissue	Adipose - Subcutaneous	Training Set
GTEX.ZYW4.2226.SM.5GZYG.1	Adipose Tissue	Adipose - Visceral (Omentum)	Training Set
GTEX.11VI4.1226.SM.5EQMP.1	Adipose Tissue	Adipose - Visceral (Omentum)	Training Set
GTEX.131XE.2426.SM.5EQ5V.1	Adipose Tissue	Adipose - Subcutaneous	Training Set
GTEX.14BIL.0226.SM.5SI9E.1	Adipose Tissue	Adipose - Subcutaneous	Training Set
GTEX.UTHO.1826.SM.3GAFE.1	Adipose Tissue	Adipose - Visceral (Omentum)	Training Set
GTEX.T2IS.0226.SM.32QPH.1	Adipose Tissue	Adipose - Subcutaneous	Training Set
GTEX.ZDYS.2126.SM.5S2OD.1	Adipose Tissue	Adipose - Subcutaneous	Training Set
GTEX.13JVG.0226.SM.5J1MW.1	Adipose Tissue	Adipose - Subcutaneous	Training Set
GTEX.14PJN.0626.SM.6EU13.1	Adipose Tissue	Adipose - Visceral (Omentum)	Training Set
GTEX.14PN3.2526.SM.6EU15.1	Adipose Tissue	Adipose - Subcutaneous	Training Set
GTEX.14PKU.0226.SM.6EU16.1	Adipose Tissue	Adipose - Visceral (Omentum)	Training Set
GTEX.1A8G6.0526.SM.7PC1E.1	Adipose Tissue	Adipose - Subcutaneous	Training Set
GTEX.ZLFU.2626.SM.DO91L.1	Adipose Tissue	Adipose - Subcutaneous	Training Set
GTEX.15CHS.0226.SM.6871L.1	Adipose Tissue	Adipose - Subcutaneous	Training Set
GTEX.14PN3.0326.SM.6EU1X.1	Adipose Tissue	Adipose - Visceral (Omentum)	Training Set
GTEX.P4PP.0226.SM.D4P1Z.1	Adipose Tissue	Adipose - Subcutaneous	Training Set
GTEX.1JN1M.0126.SM.D4P23.1	Adipose Tissue	Adipose - Subcutaneous	Training Set
GTEX.1A8FM.2126.SM.7PC27.1	Adipose Tissue	Adipose - Visceral (Omentum)	Training Set
GTEX.14JIY.1426.SM.6EU29.1	Adipose Tissue	Adipose - Visceral (Omentum)	Training Set
GTEX.1HCU7.2026.SM.A9G2B.1	Adipose Tissue	Adipose - Visceral (Omentum)	Training Set
GTEX.1NHNU.1126.SM.E9J2C.1	Adipose Tissue	Adipose - Subcutaneous	Training Set
GTEX.ZGAY.0626.SM.DO92E.1	Adipose Tissue	Adipose - Subcutaneous	Training Set
GTEX.14PHW.1626.SM.6EU2H.1	Adipose Tissue	Adipose - Visceral (Omentum)	Training Set
GTEX.1F6I4.2126.SM.7PC2J.1	Adipose Tissue	Adipose - Visceral (Omentum)	Training Set
GTEX.1F75A.0226.SM.7PC2K.1	Adipose Tissue	Adipose - Subcutaneous	Training Set
GTEX.1QP28.0226.SM.E9J2N.1	Adipose Tissue	Adipose - Subcutaneous	Training Set
GTEX.1MCYP.1826.SM.E9J2Q.1	Adipose Tissue	Adipose - Subcutaneous	Training Set
GTEX.15CHQ.0226.SM.6EU2S.1	Adipose Tissue	Adipose - Subcutaneous	Training Set
GTEX.1JMQI.1026.SM.COH2U.1	Adipose Tissue	Adipose - Visceral (Omentum)	Training Set
GTEX.1PBJI.1326.SM.E9J2V.1	Adipose Tissue	Adipose - Visceral (Omentum)	Training Set
GTEX.ZLWG.2226.SM.DO92V.1	Adipose Tissue	Adipose - Subcutaneous	Training Set
GTEX.1JJEA.0226.SM.COH2X.1	Adipose Tissue	Adipose - Subcutaneous	Training Set
GTEX.1GF9X.0926.SM.7PC2X.1	Adipose Tissue	Adipose - Visceral (Omentum)	Training Set
GTEX.1MUQO.0526.SM.E9J31.1	Adipose Tissue	Adipose - Subcutaneous	Training Set
GTEX.1N2EF.0626.SM.E9J32.1	Adipose Tissue	Adipose - Subcutaneous	Training Set
GTEX.1KAFJ.2426.SM.D4P32.1	Adipose Tissue	Adipose - Subcutaneous	Training Set
GTEX.1JN6P.0226.SM.COH34.1	Adipose Tissue	Adipose - Subcutaneous	Training Set
GTEX.1CAMS.0326.SM.7PC35.1	Adipose Tissue	Adipose - Subcutaneous	Training Set
GTEX.1I1GR.1726.SM.COH39.1	Adipose Tissue	Adipose - Visceral (Omentum)	Training Set
GTEX.1JMQJ.1926.SM.D4P3A.1	Adipose Tissue	Adipose - Visceral (Omentum)	Training Set
GTEX.1LGRB.0526.SM.COH3A.1	Adipose Tissue	Adipose - Visceral (Omentum)	Training Set
GTEX.1IE54.1426.SM.CL53C.1	Adipose Tissue	Adipose - Visceral (Omentum)	Training Set
GTEX.1GN2E.0326.SM.COH3C.1	Adipose Tissue	Adipose - Subcutaneous	Training Set
GTEX.1OJC3.1326.SM.E9J3D.1	Adipose Tissue	Adipose - Visceral (Omentum)	Training Set
GTEX.1HR9M.0226.SM.COH3E.1	Adipose Tissue	Adipose - Subcutaneous	Training Set
GTEX.1PDJ9.0426.SM.E9J3E.1	Adipose Tissue	Adipose - Subcutaneous	Training Set
GTEX.1I1CD.1026.SM.COH3G.1	Adipose Tissue	Adipose - Visceral (Omentum)	Training Set
GTEX.1I1GQ.0226.SM.COH3I.1	Adipose Tissue	Adipose - Subcutaneous	Training Set
GTEX.1GN73.0626.SM.7PC3I.1	Adipose Tissue	Adipose - Visceral (Omentum)	Training Set
GTEX.1KD4Q.1426.SM.D4P3K.1	Adipose Tissue	Adipose - Visceral (Omentum)	Training Set
GTEX.1HC8U.0926.SM.A9G3L.1	Adipose Tissue	Adipose - Visceral (Omentum)	Training Set
GTEX.1PFEY.1626.SM.E9J3M.1	Adipose Tissue	Adipose - Subcutaneous	Training Set
GTEX.1PIGE.1226.SM.EVR3Q.1	Adipose Tissue	Adipose - Visceral (Omentum)	Training Set
GTEX.1F75I.0426.SM.7PC3S.1	Adipose Tissue	Adipose - Subcutaneous	Training Set
GTEX.1IKJJ.0226.SM.COH3T.1	Adipose Tissue	Adipose - Subcutaneous	Training Set
GTEX.1KANC.0526.SM.D4P3T.1	Adipose Tissue	Adipose - Visceral (Omentum)	Training Set
GTEX.S4P3.1526.SM.E9J3W.1	Adipose Tissue	Adipose - Subcutaneous	Training Set
GTEX.Y3I4.0726.SM.E9J3Y.1	Adipose Tissue	Adipose - Visceral (Omentum)	Training Set
GTEX.1QW4Y.1626.SM.EAZ41.1	Adipose Tissue	Adipose - Subcutaneous	Training Set
GTEX.1PWST.0326.SM.EAZ42.1	Adipose Tissue	Adipose - Subcutaneous	Training Set
GTEX.1IGQW.0226.SM.COH43.1	Adipose Tissue	Adipose - Subcutaneous	Training Set
GTEX.1I6K7.0226.SM.CJI46.1	Adipose Tissue	Adipose - Subcutaneous	Training Set
GTEX.1QCLY.0526.SM.EAZ47.1	Adipose Tissue	Adipose - Subcutaneous	Training Set
GTEX.1ICLY.1426.SM.CJI48.1	Adipose Tissue	Adipose - Visceral (Omentum)	Training Set
GTEX.1I1HK.0226.SM.COH4A.1	Adipose Tissue	Adipose - Subcutaneous	Training Set
GTEX.1QPFJ.0126.SM.E9J4B.1	Adipose Tissue	Adipose - Subcutaneous	Training Set
GTEX.1QP67.1126.SM.EAZ4C.1	Adipose Tissue	Adipose - Visceral (Omentum)	Training Set
GTEX.1QP28.0926.SM.EVR4D.1	Adipose Tissue	Adipose - Visceral (Omentum)	Training Set
GTEX.1J1OQ.1526.SM.CJI4E.1	Adipose Tissue	Adipose - Visceral (Omentum)	Training Set
GTEX.17MF6.0226.SM.7LG4G.1	Adipose Tissue	Adipose - Subcutaneous	Training Set
GTEX.1LVAN.0126.SM.COH4H.1	Adipose Tissue	Adipose - Subcutaneous	Training Set
GTEX.1QP6S.0126.SM.E9J4K.1	Adipose Tissue	Adipose - Subcutaneous	Training Set
GTEX.1R9PO.0926.SM.E9U4Q.1	Adipose Tissue	Adipose - Visceral (Omentum)	Training Set
GTEX.1RNSC.1626.SM.EVR4U.1	Adipose Tissue	Adipose - Visceral (Omentum)	Training Set
GTEX.1RAZA.0226.SM.E9U4W.1	Adipose Tissue	Adipose - Subcutaneous	Training Set
GTEX.17HII.0326.SM.7LG4X.1	Adipose Tissue	Adipose - Subcutaneous	Training Set
GTEX.1S5VW.2426.SM.EAZ52.1	Adipose Tissue	Adipose - Visceral (Omentum)	Training Set
GTEX.1LGOU.2226.SM.E9U56.1	Adipose Tissue	Adipose - Subcutaneous	Training Set
GTEX.1LH75.2526.SM.E9U5A.1	Adipose Tissue	Adipose - Subcutaneous	Training Set
GTEX.17HHY.1026.SM.7LG5E.1	Adipose Tissue	Adipose - Visceral (Omentum)	Training Set
GTEX.16AAH.2026.SM.7LG5F.1	Adipose Tissue	Adipose - Subcutaneous	Training Set
GTEX.1MCC2.2326.SM.E9U5G.1	Adipose Tissue	Adipose - Subcutaneous	Training Set
GTEX.1CB4H.0326.SM.9WG5G.1	Adipose Tissue	Adipose - Subcutaneous	Training Set
GTEX.1N2DV.0626.SM.E9U5H.1	Adipose Tissue	Adipose - Visceral (Omentum)	Training Set
GTEX.18D9U.0726.SM.7LG5J.1	Adipose Tissue	Adipose - Subcutaneous	Training Set
GTEX.1E1VI.1826.SM.9WG5J.1	Adipose Tissue	Adipose - Visceral (Omentum)	Training Set
GTEX.11NUK.0326.SM.5HL5K.1	Adipose Tissue	Adipose - Subcutaneous	Training Set
GTEX.1F88F.2626.SM.9WG5K.1	Adipose Tissue	Adipose - Subcutaneous	Training Set
GTEX.16NGA.1826.SM.7LG5L.1	Adipose Tissue	Adipose - Subcutaneous	Training Set
GTEX.1H1ZS.0526.SM.9WG5L.1	Adipose Tissue	Adipose - Subcutaneous	Training Set
GTEX.18465.0226.SM.7LG5M.1	Adipose Tissue	Adipose - Subcutaneous	Training Set
GTEX.1LVA9.0226.SM.E9U5N.1	Adipose Tissue	Adipose - Subcutaneous	Training Set
GTEX.ZYT6.0326.SM.7LG5R.1	Adipose Tissue	Adipose - Subcutaneous	Training Set
GTEX.1AMEY.0526.SM.72D62.1	Adipose Tissue	Adipose - Visceral (Omentum)	Training Set
GTEX.1A3MX.0826.SM.72D64.1	Adipose Tissue	Adipose - Visceral (Omentum)	Training Set
GTEX.18A67.0226.SM.7LG67.1	Adipose Tissue	Adipose - Subcutaneous	Training Set
GTEX.1A3MW.0826.SM.72D6C.1	Adipose Tissue	Adipose - Visceral (Omentum)	Training Set
GTEX.1K9T9.0226.SM.E9U6K.1	Adipose Tissue	Adipose - Subcutaneous	Training Set
GTEX.15SDE.2426.SM.72D6L.1	Adipose Tissue	Adipose - Subcutaneous	Training Set
GTEX.1GZ2Q.0326.SM.9WG6N.1	Adipose Tissue	Adipose - Subcutaneous	Training Set
GTEX.1LVAO.0226.SM.E9U6O.1	Adipose Tissue	Adipose - Subcutaneous	Training Set
GTEX.1L5NE.2626.SM.E9U6P.1	Adipose Tissue	Adipose - Subcutaneous	Training Set
GTEX.1H1DE.2026.SM.9WG6Q.1	Adipose Tissue	Adipose - Subcutaneous	Training Set
GTEX.1F52S.1326.SM.7SB6Q.1	Adipose Tissue	Adipose - Visceral (Omentum)	Training Set
GTEX.1B8KE.0826.SM.72D6S.1	Adipose Tissue	Adipose - Visceral (Omentum)	Training Set
GTEX.145ME.1926.SM.5MR6T.1	Adipose Tissue	Adipose - Subcutaneous	Training Set
GTEX.17KNJ.2226.SM.7LG6W.1	Adipose Tissue	Adipose - Subcutaneous	Training Set
GTEX.1GZ4H.0926.SM.9WG6Y.1	Adipose Tissue	Adipose - Visceral (Omentum)	Training Set
GTEX.XOT4.0226.SM.4B66Z.1	Adipose Tissue	Adipose - Subcutaneous	Training Set
GTEX.1AX8Y.1226.SM.72D6Z.1	Adipose Tissue	Adipose - Visceral (Omentum)	Training Set
GTEX.1H1ZS.1326.SM.9WG74.1	Adipose Tissue	Adipose - Visceral (Omentum)	Training Set
GTEX.1AX9I.0226.SM.7SB75.1	Adipose Tissue	Adipose - Subcutaneous	Training Set
GTEX.1B8L1.2626.SM.7SB77.1	Adipose Tissue	Adipose - Subcutaneous	Training Set
GTEX.1B97J.1126.SM.7SB79.1	Adipose Tissue	Adipose - Visceral (Omentum)	Training Set
GTEX.1C64N.1326.SM.7SB7D.1	Adipose Tissue	Adipose - Visceral (Omentum)	Training Set
GTEX.1CAMQ.1226.SM.7SB7E.1	Adipose Tissue	Adipose - Visceral (Omentum)	Training Set
GTEX.1CAMS.0926.SM.7SB7F.1	Adipose Tissue	Adipose - Visceral (Omentum)	Training Set
GTEX.15TU5.1126.SM.6M47J.1	Adipose Tissue	Adipose - Visceral (Omentum)	Training Set
GTEX.1ICG6.1726.SM.ARU7K.1	Adipose Tissue	Adipose - Visceral (Omentum)	Training Set
GTEX.1A8FM.0126.SM.7SB7P.1	Adipose Tissue	Adipose - Subcutaneous	Training Set
GTEX.1ICLY.0226.SM.ARL7R.1	Adipose Tissue	Adipose - Subcutaneous	Training Set
GTEX.1CAMQ.0126.SM.7SB7S.1	Adipose Tissue	Adipose - Subcutaneous	Training Set
GTEX.1F52S.0226.SM.7SB7U.1	Adipose Tissue	Adipose - Subcutaneous	Training Set
GTEX.1R7EV.1026.SM.DTX81.1	Adipose Tissue	Adipose - Visceral (Omentum)	Training Set
GTEX.1F48J.0226.SM.7SB82.1	Adipose Tissue	Adipose - Subcutaneous	Training Set
GTEX.1F5PL.1326.SM.7SB83.1	Adipose Tissue	Adipose - Visceral (Omentum)	Training Set
GTEX.1IDJU.0926.SM.ARL88.1	Adipose Tissue	Adipose - Visceral (Omentum)	Training Set
GTEX.14PKU.2126.SM.7LT8A.1	Adipose Tissue	Adipose - Subcutaneous	Training Set
GTEX.1F75I.1026.SM.7SB8B.1	Adipose Tissue	Adipose - Visceral (Omentum)	Training Set
GTEX.15EU6.1726.SM.6M48H.1	Adipose Tissue	Adipose - Visceral (Omentum)	Training Set
GTEX.18A7A.0926.SM.7LT8H.1	Adipose Tissue	Adipose - Visceral (Omentum)	Training Set
GTEX.1F88E.0526.SM.7SB8J.1	Adipose Tissue	Adipose - Subcutaneous	Training Set
GTEX.1FIGZ.1626.SM.7SB8L.1	Adipose Tissue	Adipose - Subcutaneous	Training Set
GTEX.1C475.0326.SM.7SB8O.1	Adipose Tissue	Adipose - Visceral (Omentum)	Training Set
GTEX.1OFPY.0826.SM.DTX8P.1	Adipose Tissue	Adipose - Visceral (Omentum)	Training Set
GTEX.1CB4G.0326.SM.7SB8R.1	Adipose Tissue	Adipose - Subcutaneous	Training Set
GTEX.183WM.0226.SM.7LT8T.1	Adipose Tissue	Adipose - Subcutaneous	Training Set
GTEX.1F48J.1826.SM.7SB8T.1	Adipose Tissue	Adipose - Visceral (Omentum)	Training Set
GTEX.1JMLX.1026.SM.D3L8U.1	Adipose Tissue	Adipose - Visceral (Omentum)	Training Set
GTEX.18A67.1326.SM.7LT8V.1	Adipose Tissue	Adipose - Visceral (Omentum)	Training Set
GTEX.1H1DE.0826.SM.ARU8V.1	Adipose Tissue	Adipose - Visceral (Omentum)	Training Set
GTEX.1GF9W.1026.SM.7SB8X.1	Adipose Tissue	Adipose - Visceral (Omentum)	Training Set
GTEX.1JMPY.1426.SM.ARL8Z.1	Adipose Tissue	Adipose - Subcutaneous	Training Set
GTEX.1N2DW.0726.SM.DTX97.1	Adipose Tissue	Adipose - Visceral (Omentum)	Training Set
GTEX.1AYCT.2226.SM.7SB98.1	Adipose Tissue	Adipose - Subcutaneous	Training Set
GTEX.1H1DF.0226.SM.ARL9A.1	Adipose Tissue	Adipose - Subcutaneous	Training Set
GTEX.1B8SF.0526.SM.7939F.1	Adipose Tissue	Adipose - Subcutaneous	Training Set
GTEX.17F9Y.0726.SM.7LT9G.1	Adipose Tissue	Adipose - Visceral (Omentum)	Training Set
GTEX.1AX9K.0926.SM.7939G.1	Adipose Tissue	Adipose - Visceral (Omentum)	Training Set
GTEX.1QAET.1226.SM.DTX9I.1	Adipose Tissue	Adipose - Visceral (Omentum)	Training Set
GTEX.1AMEY.1426.SM.7939I.1	Adipose Tissue	Adipose - Subcutaneous	Training Set
GTEX.1GF9U.1226.SM.ARL9I.1	Adipose Tissue	Adipose - Visceral (Omentum)	Training Set
GTEX.1KANA.0826.SM.D3L9J.1	Adipose Tissue	Adipose - Subcutaneous	Training Set
GTEX.1C4CL.0426.SM.7939N.1	Adipose Tissue	Adipose - Subcutaneous	Training Set
GTEX.17MFQ.1126.SM.7LT9O.1	Adipose Tissue	Adipose - Visceral (Omentum)	Training Set
GTEX.1A3MW.0226.SM.7939O.1	Adipose Tissue	Adipose - Subcutaneous	Training Set
GTEX.1S831.1926.SM.EV79P.1	Adipose Tissue	Adipose - Visceral (Omentum)	Training Set
GTEX.1B8SG.0226.SM.7939Q.1	Adipose Tissue	Adipose - Subcutaneous	Training Set
GTEX.18A6Q.1026.SM.7LT9S.1	Adipose Tissue	Adipose - Visceral (Omentum)	Training Set
GTEX.1B933.1326.SM.7939U.1	Adipose Tissue	Adipose - Visceral (Omentum)	Training Set
GTEX.17F97.0426.SM.7LT9U.1	Adipose Tissue	Adipose - Subcutaneous	Training Set
GTEX.1B97I.1726.SM.7939V.1	Adipose Tissue	Adipose - Subcutaneous	Training Set
GTEX.16AAH.1526.SM.7LT9W.1	Adipose Tissue	Adipose - Visceral (Omentum)	Training Set
GTEX.1HBPM.1726.SM.A8N9W.1	Adipose Tissue	Adipose - Visceral (Omentum)	Training Set
GTEX.14ICK.1726.SM.6AJA5.1	Adipose Tissue	Adipose - Visceral (Omentum)	Training Set
GTEX.1B932.1726.SM.793A5.1	Adipose Tissue	Adipose - Visceral (Omentum)	Training Set
GTEX.18D9A.0726.SM.7LTA7.1	Adipose Tissue	Adipose - Visceral (Omentum)	Training Set
GTEX.1A32A.0926.SM.718AB.1	Adipose Tissue	Adipose - Visceral (Omentum)	Training Set
GTEX.18A66.1926.SM.7LTAG.1	Adipose Tissue	Adipose - Visceral (Omentum)	Training Set
GTEX.1CAMR.0326.SM.793AH.1	Adipose Tissue	Adipose - Visceral (Omentum)	Training Set
GTEX.R45C.0226.SM.EVYAJ.1	Adipose Tissue	Adipose - Subcutaneous	Training Set
GTEX.16NGA.0526.SM.731AJ.1	Adipose Tissue	Adipose - Visceral (Omentum)	Training Set
GTEX.17KNJ.0426.SM.718AK.1	Adipose Tissue	Adipose - Visceral (Omentum)	Training Set
GTEX.17GQL.0826.SM.731AM.1	Adipose Tissue	Adipose - Visceral (Omentum)	Training Set
GTEX.18D9U.0426.SM.731AN.1	Adipose Tissue	Adipose - Visceral (Omentum)	Training Set
GTEX.VJWN.2326.SM.EVYAP.1	Adipose Tissue	Adipose - Visceral (Omentum)	Training Set
GTEX.18D9B.1726.SM.7LTAP.1	Adipose Tissue	Adipose - Visceral (Omentum)	Training Set
GTEX.18A6Q.0226.SM.718AS.1	Adipose Tissue	Adipose - Subcutaneous	Training Set
GTEX.1A8G7.0226.SM.731AS.1	Adipose Tissue	Adipose - Subcutaneous	Training Set
GTEX.17HHE.1526.SM.793AS.1	Adipose Tissue	Adipose - Visceral (Omentum)	Training Set
GTEX.18A7A.0326.SM.731AT.1	Adipose Tissue	Adipose - Subcutaneous	Training Set
GTEX.18A7B.1226.SM.718AU.1	Adipose Tissue	Adipose - Visceral (Omentum)	Training Set
GTEX.1A32A.0226.SM.718B2.1	Adipose Tissue	Adipose - Subcutaneous	Training Set
GTEX.18465.1826.SM.731BB.1	Adipose Tissue	Adipose - Visceral (Omentum)	Training Set
GTEX.1QP2A.0226.SM.EVYBC.1	Adipose Tissue	Adipose - Subcutaneous	Training Set
GTEX.18A66.0326.SM.718BE.1	Adipose Tissue	Adipose - Subcutaneous	Training Set
GTEX.1KANB.2426.SM.EV7BE.1	Adipose Tissue	Adipose - Visceral (Omentum)	Training Set
GTEX.1R7EV.1926.SM.EVYBF.1	Adipose Tissue	Adipose - Subcutaneous	Training Set
GTEX.18D9A.2026.SM.718BL.1	Adipose Tissue	Adipose - Subcutaneous	Training Set
GTEX.1LG7Z.2026.SM.DLHBP.1	Adipose Tissue	Adipose - Subcutaneous	Training Set
GTEX.18QFQ.0226.SM.731BQ.1	Adipose Tissue	Adipose - Subcutaneous	Training Set
GTEX.17HHY.0226.SM.793BQ.1	Adipose Tissue	Adipose - Subcutaneous	Training Set
GTEX.1AMFI.2126.SM.731BT.1	Adipose Tissue	Adipose - Subcutaneous	Training Set
GTEX.1PIIG.0326.SM.EVYBV.1	Adipose Tissue	Adipose - Subcutaneous	Training Set
GTEX.1A3MV.2126.SM.718BV.1	Adipose Tissue	Adipose - Subcutaneous	Training Set
GTEX.1AX9I.1726.SM.731BX.1	Adipose Tissue	Adipose - Visceral (Omentum)	Training Set
GTEX.183FY.0326.SM.793BY.1	Adipose Tissue	Adipose - Subcutaneous	Training Set
GTEX.1R46S.0526.SM.EVYBZ.1	Adipose Tissue	Adipose - Subcutaneous	Training Set
GTEX.1POEN.1626.SM.EVYC2.1	Adipose Tissue	Adipose - Visceral (Omentum)	Training Set
GTEX.1QCLY.1226.SM.EVYC3.1	Adipose Tissue	Adipose - Visceral (Omentum)	Training Set
GTEX.1A3MX.0226.SM.731C4.1	Adipose Tissue	Adipose - Subcutaneous	Training Set
GTEX.1QP6S.1626.SM.EVYC5.1	Adipose Tissue	Adipose - Visceral (Omentum)	Training Set
GTEX.1RAZR.0226.SM.EVYC6.1	Adipose Tissue	Adipose - Subcutaneous	Training Set
GTEX.13YAN.1126.SM.5TDC7.1	Adipose Tissue	Adipose - Visceral (Omentum)	Training Set
GTEX.17F96.0726.SM.793CB.1	Adipose Tissue	Adipose - Visceral (Omentum)	Training Set
GTEX.1S3DN.1626.SM.EVYCC.1	Adipose Tissue	Adipose - Visceral (Omentum)	Training Set
GTEX.18QFQ.1326.SM.731CF.1	Adipose Tissue	Adipose - Visceral (Omentum)	Training Set
GTEX.17KNJ.2226.SM.731CG.1	Adipose Tissue	Adipose - Subcutaneous	Training Set
GTEX.1A3MV.0626.SM.731CH.1	Adipose Tissue	Adipose - Visceral (Omentum)	Training Set
GTEX.1MGNQ.0226.SM.EVYCK.1	Adipose Tissue	Adipose - Subcutaneous	Training Set
GTEX.14A5H.0526.SM.5TDCN.1	Adipose Tissue	Adipose - Subcutaneous	Training Set
GTEX.1LKK1.1526.SM.EVYCO.1	Adipose Tissue	Adipose - Visceral (Omentum)	Training Set
GTEX.PSDG.0326.SM.48TCP.1	Adipose Tissue	Adipose - Subcutaneous	Training Set
GTEX.1CB4E.0826.SM.793CS.1	Adipose Tissue	Adipose - Visceral (Omentum)	Training Set
GTEX.13X6J.1926.SM.5TDCU.1	Adipose Tissue	Adipose - Visceral (Omentum)	Training Set
GTEX.1S83E.0226.SM.EVYCW.1	Adipose Tissue	Adipose - Subcutaneous	Training Set
GTEX.1AX9J.2226.SM.731CW.1	Adipose Tissue	Adipose - Visceral (Omentum)	Training Set
GTEX.1LSVX.0126.SM.EVYCY.1	Adipose Tissue	Adipose - Subcutaneous	Training Set
GTEX.1E1VI.0226.SM.793CZ.1	Adipose Tissue	Adipose - Subcutaneous	Training Set
GTEX.1MUQO.0826.SM.EVYCZ.1	Adipose Tissue	Adipose - Visceral (Omentum)	Training Set
GTEX.1RQEC.2526.SM.EVYD2.1	Adipose Tissue	Adipose - Visceral (Omentum)	Training Set
GTEX.14BIM.1626.SM.7EWD2.1	Adipose Tissue	Adipose - Visceral (Omentum)	Training Set
GTEX.147JS.0426.SM.5TDD2.1	Adipose Tissue	Adipose - Subcutaneous	Training Set
GTEX.1EWIQ.0226.SM.793D3.1	Adipose Tissue	Adipose - Subcutaneous	Training Set
GTEX.1S831.0326.SM.EVYD3.1	Adipose Tissue	Adipose - Subcutaneous	Training Set
GTEX.14AS3.2026.SM.5TDD9.1	Adipose Tissue	Adipose - Subcutaneous	Training Set
GTEX.145MG.0126.SM.5TDDA.1	Adipose Tissue	Adipose - Subcutaneous	Training Set
GTEX.17EUY.0526.SM.7EWDE.1	Adipose Tissue	Adipose - Subcutaneous	Training Set
GTEX.1EU9M.1126.SM.793DE.1	Adipose Tissue	Adipose - Visceral (Omentum)	Training Set
GTEX.16NPX.0326.SM.7EWDI.1	Adipose Tissue	Adipose - Subcutaneous	Training Set
GTEX.14ABY.1926.SM.62LDJ.1	Adipose Tissue	Adipose - Visceral (Omentum)	Training Set
GTEX.14ABY.0326.SM.5TDDK.1	Adipose Tissue	Adipose - Subcutaneous	Training Set
GTEX.14C5O.0926.SM.793DM.1	Adipose Tissue	Adipose - Visceral (Omentum)	Training Set
GTEX.14ICL.2026.SM.62LDN.1	Adipose Tissue	Adipose - Subcutaneous	Training Set
GTEX.14BIN.0726.SM.793DQ.1	Adipose Tissue	Adipose - Subcutaneous	Training Set
GTEX.1QP66.1326.SM.DTXDQ.1	Adipose Tissue	Adipose - Subcutaneous	Training Set
GTEX.14E1K.2126.SM.793DU.1	Adipose Tissue	Adipose - Subcutaneous	Training Set
GTEX.14C39.0826.SM.5TDDU.1	Adipose Tissue	Adipose - Visceral (Omentum)	Training Set
GTEX.Q2AH.1726.SM.DIPDV.1	Adipose Tissue	Adipose - Subcutaneous	Training Set
GTEX.14E6D.0226.SM.62LDW.1	Adipose Tissue	Adipose - Subcutaneous	Training Set
GTEX.15UKP.1426.SM.7KUDX.1	Adipose Tissue	Adipose - Visceral (Omentum)	Training Set
GTEX.WFG8.2326.SM.DIPDX.1	Adipose Tissue	Adipose - Subcutaneous	Training Set
GTEX.14H4A.1026.SM.62LDY.1	Adipose Tissue	Adipose - Subcutaneous	Training Set
GTEX.1QW4Y.0826.SM.DTXE1.1	Adipose Tissue	Adipose - Visceral (Omentum)	Training Set
GTEX.QEG4.0326.SM.DIPE3.1	Adipose Tissue	Adipose - Subcutaneous	Training Set
GTEX.16GPK.1326.SM.7KUE4.1	Adipose Tissue	Adipose - Visceral (Omentum)	Training Set
GTEX.1MJK2.0526.SM.DTXE6.1	Adipose Tissue	Adipose - Subcutaneous	Training Set
GTEX.16NFA.1126.SM.7KUE7.1	Adipose Tissue	Adipose - Visceral (Omentum)	Training Set
GTEX.1N2EE.1526.SM.DTXE9.1	Adipose Tissue	Adipose - Visceral (Omentum)	Training Set
GTEX.16XZZ.1626.SM.7KUEC.1	Adipose Tissue	Adipose - Visceral (Omentum)	Training Set
GTEX.14E6E.0226.SM.7DUEF.1	Adipose Tissue	Adipose - Visceral (Omentum)	Training Set
GTEX.13OVK.0326.SM.7KUEJ.1	Adipose Tissue	Adipose - Visceral (Omentum)	Training Set
GTEX.1HR98.0226.SM.CGQEK.1	Adipose Tissue	Adipose - Subcutaneous	Training Set
GTEX.14LLW.0226.SM.62LEL.1	Adipose Tissue	Adipose - Subcutaneous	Training Set
GTEX.15G19.1126.SM.7KUEL.1	Adipose Tissue	Adipose - Visceral (Omentum)	Training Set
GTEX.1B8SG.1426.SM.7EWEM.1	Adipose Tissue	Adipose - Visceral (Omentum)	Training Set
GTEX.14PHX.2426.SM.62LEN.1	Adipose Tissue	Adipose - Subcutaneous	Training Set
GTEX.15DYW.1526.SM.7KUEP.1	Adipose Tissue	Adipose - Visceral (Omentum)	Training Set
GTEX.1I1GT.0526.SM.CGQEQ.1	Adipose Tissue	Adipose - Subcutaneous	Training Set
GTEX.17HGU.0326.SM.7DUER.1	Adipose Tissue	Adipose - Subcutaneous	Training Set
GTEX.14E6D.1326.SM.62LES.1	Adipose Tissue	Adipose - Visceral (Omentum)	Training Set
GTEX.1C64O.1526.SM.7EWES.1	Adipose Tissue	Adipose - Visceral (Omentum)	Training Set
GTEX.1HCU6.0226.SM.CGQES.1	Adipose Tissue	Adipose - Subcutaneous	Training Set
GTEX.1P4AB.1226.SM.DTXET.1	Adipose Tissue	Adipose - Visceral (Omentum)	Training Set
GTEX.1LSVX.1326.SM.DIPET.1	Adipose Tissue	Adipose - Visceral (Omentum)	Training Set
GTEX.1HCVE.0226.SM.CGQEV.1	Adipose Tissue	Adipose - Subcutaneous	Training Set
GTEX.14PHY.1026.SM.62LEV.1	Adipose Tissue	Adipose - Visceral (Omentum)	Training Set
GTEX.14PJ3.1926.SM.62LEY.1	Adipose Tissue	Adipose - Subcutaneous	Training Set
GTEX.1HSMO.0226.SM.CGQEZ.1	Adipose Tissue	Adipose - Subcutaneous	Training Set
GTEX.14PJ4.0126.SM.62LEZ.1	Adipose Tissue	Adipose - Visceral (Omentum)	Training Set
GTEX.14PJM.0326.SM.62LF2.1	Adipose Tissue	Adipose - Subcutaneous	Training Set
GTEX.14PK6.0926.SM.62LF4.1	Adipose Tissue	Adipose - Visceral (Omentum)	Training Set
GTEX.1HUB1.1526.SM.CGQF6.1	Adipose Tissue	Adipose - Visceral (Omentum)	Training Set
GTEX.1K2DU.0726.SM.DIPF7.1	Adipose Tissue	Adipose - Visceral (Omentum)	Training Set
GTEX.15RIE.0126.SM.7KUF8.1	Adipose Tissue	Adipose - Visceral (Omentum)	Training Set
GTEX.1PIGE.0526.SM.DTXFA.1	Adipose Tissue	Adipose - Subcutaneous	Training Set
GTEX.1I1GU.2326.SM.CGQFB.1	Adipose Tissue	Adipose - Subcutaneous	Training Set
GTEX.1BAJH.2126.SM.7EWFB.1	Adipose Tissue	Adipose - Visceral (Omentum)	Training Set
GTEX.1I6K6.1526.SM.CGQFC.1	Adipose Tissue	Adipose - Visceral (Omentum)	Training Set
GTEX.1PPGY.0326.SM.DTXFD.1	Adipose Tissue	Adipose - Subcutaneous	Training Set
GTEX.14PJ2.1426.SM.62LFF.1	Adipose Tissue	Adipose - Visceral (Omentum)	Training Set
GTEX.14JIY.0526.SM.62LFH.1	Adipose Tissue	Adipose - Subcutaneous	Training Set
GTEX.17HII.0826.SM.7DUFH.1	Adipose Tissue	Adipose - Visceral (Omentum)	Training Set
GTEX.1HFI6.1726.SM.CGQFH.1	Adipose Tissue	Adipose - Visceral (Omentum)	Training Set
GTEX.16GPK.0226.SM.7DUFI.1	Adipose Tissue	Adipose - Subcutaneous	Training Set
GTEX.1HSMP.0226.SM.CGQFI.1	Adipose Tissue	Adipose - Subcutaneous	Training Set
GTEX.1LSNL.0526.SM.DIPFI.1	Adipose Tissue	Adipose - Subcutaneous	Training Set
GTEX.132QS.2526.SM.62LFJ.1	Adipose Tissue	Adipose - Subcutaneous	Training Set
GTEX.1QP9N.1526.SM.DTXFK.1	Adipose Tissue	Adipose - Subcutaneous	Training Set
GTEX.1LVAM.1026.SM.DIPFK.1	Adipose Tissue	Adipose - Visceral (Omentum)	Training Set
GTEX.1I1GP.2326.SM.CGQFL.1	Adipose Tissue	Adipose - Subcutaneous	Training Set
GTEX.1QP29.0726.SM.DTXFM.1	Adipose Tissue	Adipose - Subcutaneous	Training Set
GTEX.1I6K7.1826.SM.CGQFO.1	Adipose Tissue	Adipose - Visceral (Omentum)	Training Set
GTEX.13FXS.1326.SM.62LFR.1	Adipose Tissue	Adipose - Visceral (Omentum)	Training Set
GTEX.1HFI7.2026.SM.CGQFR.1	Adipose Tissue	Adipose - Subcutaneous	Training Set
GTEX.Y9LG.2026.SM.62LFS.1	Adipose Tissue	Adipose - Subcutaneous	Training Set
GTEX.1K9T9.1626.SM.DIPFS.1	Adipose Tissue	Adipose - Visceral (Omentum)	Training Set
GTEX.1QP9N.0426.SM.DTXFT.1	Adipose Tissue	Adipose - Visceral (Omentum)	Training Set
GTEX.1HSGN.0126.SM.CGQFU.1	Adipose Tissue	Adipose - Subcutaneous	Training Set
GTEX.1C475.1926.SM.7DUFV.1	Adipose Tissue	Adipose - Subcutaneous	Training Set
GTEX.1IDFM.0226.SM.CMKFX.1	Adipose Tissue	Adipose - Subcutaneous	Training Set
GTEX.1J8EW.1526.SM.CMKFZ.1	Adipose Tissue	Adipose - Visceral (Omentum)	Training Set
GTEX.1RDX4.0226.SM.DTXG1.1	Adipose Tissue	Adipose - Subcutaneous	Training Set
GTEX.1ICG6.2626.SM.CGQG1.1	Adipose Tissue	Adipose - Subcutaneous	Training Set
GTEX.1IDJC.0226.SM.CMKG2.1	Adipose Tissue	Adipose - Visceral (Omentum)	Training Set
GTEX.1JKYN.0526.SM.CGQG3.1	Adipose Tissue	Adipose - Visceral (Omentum)	Training Set
GTEX.1AYD5.0126.SM.7DUG5.1	Adipose Tissue	Adipose - Visceral (Omentum)	Training Set
GTEX.144GO.1626.SM.7EPG5.1	Adipose Tissue	Adipose - Subcutaneous	Training Set
GTEX.1J8JJ.0326.SM.CMKG6.1	Adipose Tissue	Adipose - Subcutaneous	Training Set
GTEX.1GPI7.0826.SM.9JGG7.1	Adipose Tissue	Adipose - Visceral (Omentum)	Training Set
GTEX.1LSNM.0626.SM.DIPG7.1	Adipose Tissue	Adipose - Visceral (Omentum)	Training Set
GTEX.1CB4E.1826.SM.7RHG8.1	Adipose Tissue	Adipose - Subcutaneous	Training Set
GTEX.1B8KZ.1926.SM.7DUG8.1	Adipose Tissue	Adipose - Subcutaneous	Training Set
GTEX.1JKYN.1226.SM.CGQG8.1	Adipose Tissue	Adipose - Subcutaneous	Training Set
GTEX.1JMLX.0126.SM.CMKG9.1	Adipose Tissue	Adipose - Subcutaneous	Training Set
GTEX.1LVAO.2126.SM.DIPGA.1	Adipose Tissue	Adipose - Visceral (Omentum)	Training Set
GTEX.1J8Q3.1526.SM.CMKGB.1	Adipose Tissue	Adipose - Subcutaneous	Training Set
GTEX.13X6J.0226.SM.7EPGC.1	Adipose Tissue	Adipose - Subcutaneous	Training Set
GTEX.1IDJF.0226.SM.CMKGE.1	Adipose Tissue	Adipose - Subcutaneous	Training Set
GTEX.1EU9M.0326.SM.7RHGF.1	Adipose Tissue	Adipose - Subcutaneous	Training Set
GTEX.1IDJU.2526.SM.CMKGF.1	Adipose Tissue	Adipose - Subcutaneous	Training Set
GTEX.1K2DA.1126.SM.CGQGG.1	Adipose Tissue	Adipose - Visceral (Omentum)	Training Set
GTEX.1IKK5.0526.SM.CMKGG.1	Adipose Tissue	Adipose - Subcutaneous	Training Set
GTEX.1HCU7.0326.SM.CMKGI.1	Adipose Tissue	Adipose - Subcutaneous	Training Set
GTEX.1K2DA.2126.SM.CGQGL.1	Adipose Tissue	Adipose - Subcutaneous	Training Set
GTEX.1JN76.0226.SM.CMKGO.1	Adipose Tissue	Adipose - Subcutaneous	Training Set
GTEX.1JMQI.2026.SM.CMKGP.1	Adipose Tissue	Adipose - Subcutaneous	Training Set
GTEX.1F75W.0226.SM.9JGGP.1	Adipose Tissue	Adipose - Subcutaneous	Training Set
GTEX.1HBPM.0326.SM.CMKGR.1	Adipose Tissue	Adipose - Subcutaneous	Training Set
GTEX.1HSGN.1926.SM.CMKGS.1	Adipose Tissue	Adipose - Visceral (Omentum)	Training Set
GTEX.1HT8W.0226.SM.CMKGT.1	Adipose Tissue	Adipose - Subcutaneous	Training Set
GTEX.1H1E6.1126.SM.9JGGV.1	Adipose Tissue	Adipose - Visceral (Omentum)	Training Set
GTEX.17HHE.1926.SM.7EPGW.1	Adipose Tissue	Adipose - Subcutaneous	Training Set
GTEX.1HCU6.1626.SM.CMKGW.1	Adipose Tissue	Adipose - Visceral (Omentum)	Training Set
GTEX.17JCI.1626.SM.7EPGZ.1	Adipose Tissue	Adipose - Visceral (Omentum)	Training Set
GTEX.14JG6.2326.SM.6LLH3.1	Adipose Tissue	Adipose - Subcutaneous	Training Set
GTEX.14PJ2.0226.SM.6LLH4.1	Adipose Tissue	Adipose - Subcutaneous	Training Set
GTEX.1C2JI.0826.SM.7EPHB.1	Adipose Tissue	Adipose - Visceral (Omentum)	Training Set
GTEX.1C6VR.1126.SM.7EPHD.1	Adipose Tissue	Adipose - Visceral (Omentum)	Training Set
GTEX.1HBPI.1826.SM.ADEHE.1	Adipose Tissue	Adipose - Visceral (Omentum)	Training Set
GTEX.RVPV.1526.SM.EXOHF.1	Adipose Tissue	Adipose - Subcutaneous	Training Set
GTEX.1HCUA.2226.SM.ADEHF.1	Adipose Tissue	Adipose - Subcutaneous	Training Set
GTEX.VJYA.1626.SM.EXOHL.1	Adipose Tissue	Adipose - Visceral (Omentum)	Training Set
GTEX.1B933.0526.SM.7EPHM.1	Adipose Tissue	Adipose - Subcutaneous	Training Set
GTEX.1GMR2.0226.SM.9JGHO.1	Adipose Tissue	Adipose - Visceral (Omentum)	Training Set
GTEX.1GZ4I.0226.SM.7RHHO.1	Adipose Tissue	Adipose - Subcutaneous	Training Set
GTEX.1IY9M.0226.SM.CMKHP.1	Adipose Tissue	Adipose - Subcutaneous	Training Set
GTEX.14PK6.2026.SM.6LLHP.1	Adipose Tissue	Adipose - Subcutaneous	Training Set
GTEX.1I1GR.0226.SM.CMKHQ.1	Adipose Tissue	Adipose - Subcutaneous	Training Set
GTEX.1I1GU.0626.SM.CMKHR.1	Adipose Tissue	Adipose - Visceral (Omentum)	Training Set
GTEX.1HSMQ.1426.SM.ADEHT.1	Adipose Tissue	Adipose - Subcutaneous	Training Set
GTEX.1HSMQ.1026.SM.ADEHU.1	Adipose Tissue	Adipose - Visceral (Omentum)	Training Set
GTEX.1RQEC.0526.SM.E6CHV.1	Adipose Tissue	Adipose - Subcutaneous	Training Set
GTEX.14JG1.0526.SM.6LLHW.1	Adipose Tissue	Adipose - Subcutaneous	Training Set
GTEX.1S5ZU.0226.SM.E6CHW.1	Adipose Tissue	Adipose - Subcutaneous	Training Set
GTEX.1IE54.0226.SM.CMKHX.1	Adipose Tissue	Adipose - Subcutaneous	Training Set
GTEX.1IOXB.0226.SM.CMKHY.1	Adipose Tissue	Adipose - Subcutaneous	Training Set
GTEX.1HSEH.1326.SM.ADEI1.1	Adipose Tissue	Adipose - Visceral (Omentum)	Training Set
GTEX.169BO.0426.SM.7EPI1.1	Adipose Tissue	Adipose - Visceral (Omentum)	Training Set
GTEX.1IL2V.0226.SM.CMKI2.1	Adipose Tissue	Adipose - Subcutaneous	Training Set
GTEX.OIZF.0226.SM.E9TI3.1	Adipose Tissue	Adipose - Subcutaneous	Training Set
GTEX.OIZG.0826.SM.E9TI4.1	Adipose Tissue	Adipose - Subcutaneous	Training Set
GTEX.1HFI6.0326.SM.ADEI5.1	Adipose Tissue	Adipose - Subcutaneous	Training Set
GTEX.1S82P.0226.SM.E6CI6.1	Adipose Tissue	Adipose - Subcutaneous	Training Set
GTEX.1JJ6O.0226.SM.E6CI9.1	Adipose Tissue	Adipose - Subcutaneous	Training Set
GTEX.1LC47.1526.SM.CY8IB.1	Adipose Tissue	Adipose - Visceral (Omentum)	Training Set
GTEX.1GF9X.1926.SM.ADEIC.1	Adipose Tissue	Adipose - Subcutaneous	Training Set
GTEX.1I6K6.0226.SM.ADEID.1	Adipose Tissue	Adipose - Subcutaneous	Training Set
GTEX.1RMOY.0826.SM.E9TIF.1	Adipose Tissue	Adipose - Visceral (Omentum)	Training Set
GTEX.1KANA.1426.SM.CY8IF.1	Adipose Tissue	Adipose - Visceral (Omentum)	Training Set
GTEX.1LG7Z.0226.SM.E6CIG.1	Adipose Tissue	Adipose - Visceral (Omentum)	Training Set
GTEX.14JG6.0526.SM.6LLIH.1	Adipose Tissue	Adipose - Visceral (Omentum)	Training Set
GTEX.1LSNM.2026.SM.E6CIJ.1	Adipose Tissue	Adipose - Subcutaneous	Training Set
GTEX.1EWIQ.2526.SM.7EPIJ.1	Adipose Tissue	Adipose - Visceral (Omentum)	Training Set
GTEX.1MA7W.0526.SM.E6CIN.1	Adipose Tissue	Adipose - Visceral (Omentum)	Training Set
GTEX.1MA7W.1926.SM.E6CIO.1	Adipose Tissue	Adipose - Subcutaneous	Training Set
GTEX.14PII.0326.SM.6LLIQ.1	Adipose Tissue	Adipose - Subcutaneous	Training Set
GTEX.1HCU8.0726.SM.ADEIR.1	Adipose Tissue	Adipose - Subcutaneous	Training Set
GTEX.POMQ.2326.SM.DHXIS.1	Adipose Tissue	Adipose - Subcutaneous	Training Set
GTEX.14PJ4.2226.SM.6LLIS.1	Adipose Tissue	Adipose - Subcutaneous	Training Set
GTEX.1H1DG.2026.SM.9QEIV.1	Adipose Tissue	Adipose - Visceral (Omentum)	Training Set
GTEX.14PJ6.2226.SM.6LLIV.1	Adipose Tissue	Adipose - Subcutaneous	Training Set
GTEX.1MA7X.2126.SM.E6CIX.1	Adipose Tissue	Adipose - Subcutaneous	Training Set
GTEX.1HCUA.0926.SM.ADEIX.1	Adipose Tissue	Adipose - Visceral (Omentum)	Training Set
GTEX.14ICK.0326.SM.6LLIZ.1	Adipose Tissue	Adipose - Subcutaneous	Training Set
GTEX.1HGF4.2526.SM.ADEIZ.1	Adipose Tissue	Adipose - Subcutaneous	Training Set
GTEX.1KWVE.1326.SM.E6CJ1.1	Adipose Tissue	Adipose - Subcutaneous	Training Set
GTEX.15SHW.1726.SM.6LPJ2.1	Adipose Tissue	Adipose - Visceral (Omentum)	Training Set
GTEX.14PN4.1426.SM.6LLJ4.1	Adipose Tissue	Adipose - Visceral (Omentum)	Training Set
GTEX.15DDE.0226.SM.6LLJ6.1	Adipose Tissue	Adipose - Subcutaneous	Training Set
GTEX.1LSNL.1426.SM.E6CJ9.1	Adipose Tissue	Adipose - Visceral (Omentum)	Training Set
GTEX.1HKZK.1726.SM.ADEJ9.1	Adipose Tissue	Adipose - Visceral (Omentum)	Training Set
GTEX.1MCQQ.1426.SM.E6CJA.1	Adipose Tissue	Adipose - Visceral (Omentum)	Training Set
GTEX.1MJK3.0626.SM.E6CJB.1	Adipose Tissue	Adipose - Visceral (Omentum)	Training Set
GTEX.1LB8K.0326.SM.E9TJC.1	Adipose Tissue	Adipose - Subcutaneous	Training Set
GTEX.1HSKV.0326.SM.ADEJC.1	Adipose Tissue	Adipose - Subcutaneous	Training Set
GTEX.1RAZQ.1526.SM.E6CJI.1	Adipose Tissue	Adipose - Visceral (Omentum)	Training Set
GTEX.17F98.1126.SM.79OJS.1	Adipose Tissue	Adipose - Subcutaneous	Training Set
GTEX.17F97.1226.SM.79OJT.1	Adipose Tissue	Adipose - Visceral (Omentum)	Training Set
GTEX.169BO.1426.SM.9MQJT.1	Adipose Tissue	Adipose - Subcutaneous	Training Set
GTEX.1C6VS.0426.SM.79OJV.1	Adipose Tissue	Adipose - Subcutaneous	Training Set
GTEX.1QPFJ.2126.SM.EXOJV.1	Adipose Tissue	Adipose - Visceral (Omentum)	Training Set
GTEX.1LBAC.0226.SM.DHXJZ.1	Adipose Tissue	Adipose - Subcutaneous	Training Set
GTEX.1GN1W.0626.SM.9MQK3.1	Adipose Tissue	Adipose - Subcutaneous	Training Set
GTEX.1N2DW.0326.SM.E9TK3.1	Adipose Tissue	Adipose - Subcutaneous	Training Set
GTEX.1RNTQ.0826.SM.E9TK8.1	Adipose Tissue	Adipose - Visceral (Omentum)	Training Set
GTEX.1GF9V.0226.SM.9MQKA.1	Adipose Tissue	Adipose - Subcutaneous	Training Set
GTEX.1GPI7.0226.SM.9MQKB.1	Adipose Tissue	Adipose - Subcutaneous	Training Set
GTEX.15DCD.0226.SM.6LPKC.1	Adipose Tissue	Adipose - Subcutaneous	Training Set
GTEX.17EVP.0426.SM.79OKG.1	Adipose Tissue	Adipose - Subcutaneous	Training Set
GTEX.17HG3.2326.SM.79OKH.1	Adipose Tissue	Adipose - Subcutaneous	Training Set
GTEX.1H1CY.2626.SM.9MQKJ.1	Adipose Tissue	Adipose - Subcutaneous	Training Set
GTEX.1GF9W.0426.SM.9MQKK.1	Adipose Tissue	Adipose - Subcutaneous	Training Set
GTEX.1KWVE.0226.SM.E9TKK.1	Adipose Tissue	Adipose - Visceral (Omentum)	Training Set
GTEX.1LGOU.0826.SM.DHXKL.1	Adipose Tissue	Adipose - Visceral (Omentum)	Training Set
GTEX.1GN1U.0726.SM.9MQKL.1	Adipose Tissue	Adipose - Visceral (Omentum)	Training Set
GTEX.17HGU.1726.SM.79OKM.1	Adipose Tissue	Adipose - Visceral (Omentum)	Training Set
GTEX.1F5PK.2526.SM.9MQKN.1	Adipose Tissue	Adipose - Subcutaneous	Training Set
GTEX.1H2FU.0226.SM.9YFKO.1	Adipose Tissue	Adipose - Subcutaneous	Training Set
GTEX.1F6RS.0226.SM.9MQKO.1	Adipose Tissue	Adipose - Subcutaneous	Training Set
GTEX.1HUB1.0326.SM.A9SKQ.1	Adipose Tissue	Adipose - Subcutaneous	Training Set
GTEX.11DXX.2326.SM.9YFKS.1	Adipose Tissue	Adipose - Subcutaneous	Training Set
GTEX.1H4P4.0226.SM.9YFKT.1	Adipose Tissue	Adipose - Subcutaneous	Training Set
GTEX.ZT9W.0126.SM.4YCFD.1	Adrenal Gland	Adrenal Gland	Training Set
GTEX.ZVP2.0126.SM.5NQ7D.1	Adrenal Gland	Adrenal Gland	Training Set
GTEX.145LT.0126.SM.5S2QJ.1	Adrenal Gland	Adrenal Gland	Training Set
GTEX.ZA64.0226.SM.5HL9C.1	Adrenal Gland	Adrenal Gland	Training Set
GTEX.131XF.0126.SM.5DUVF.1	Adrenal Gland	Adrenal Gland	Training Set
GTEX.ZVT2.0826.SM.5GIEO.1	Adrenal Gland	Adrenal Gland	Training Set
GTEX.WY7C.0326.SM.4OND5.1	Adrenal Gland	Adrenal Gland	Training Set
GTEX.12696.0626.SM.5EGGD.1	Adrenal Gland	Adrenal Gland	Training Set
GTEX.ZLV1.0226.SM.4WWC1.1	Adrenal Gland	Adrenal Gland	Training Set
GTEX.QEG5.1826.SM.4R1JP.1	Adrenal Gland	Adrenal Gland	Training Set
GTEX.S33H.1326.SM.4AD6A.1	Adrenal Gland	Adrenal Gland	Training Set
GTEX.13D11.0426.SM.5LZYA.1	Adrenal Gland	Adrenal Gland	Training Set
GTEX.O5YV.1126.SM.3LK73.1	Adrenal Gland	Adrenal Gland	Training Set
GTEX.12WSJ.0126.SM.5GCOM.1	Adrenal Gland	Adrenal Gland	Training Set
GTEX.Y9LG.0126.SM.5Q59W.1	Adrenal Gland	Adrenal Gland	Training Set
GTEX.131XG.1326.SM.5DUX4.1	Adrenal Gland	Adrenal Gland	Training Set
GTEX.13OW6.1726.SM.5IJGI.1	Adrenal Gland	Adrenal Gland	Training Set
GTEX.PWOO.0326.SM.48TDB.1	Adrenal Gland	Adrenal Gland	Training Set
GTEX.11DXY.1626.SM.5H12L.1	Adrenal Gland	Adrenal Gland	Training Set
GTEX.148VJ.1626.SM.5QGPH.1	Adrenal Gland	Adrenal Gland	Training Set
GTEX.X4EO.1726.SM.4QARN.1	Adrenal Gland	Adrenal Gland	Training Set
GTEX.P4QT.1326.SM.3NMD3.1	Adrenal Gland	Adrenal Gland	Training Set
GTEX.ZYFG.0926.SM.5BC5U.1	Adrenal Gland	Adrenal Gland	Training Set
GTEX.S4Z8.0126.SM.4GICC.1	Adrenal Gland	Adrenal Gland	Training Set
GTEX.QDVN.0426.SM.48TZ6.1	Adrenal Gland	Adrenal Gland	Training Set
GTEX.ZDTT.0126.SM.4WKHA.1	Adrenal Gland	Adrenal Gland	Training Set
GTEX.RUSQ.0226.SM.47JWT.1	Adrenal Gland	Adrenal Gland	Training Set
GTEX.Y3IK.0226.SM.51MRJ.1	Adrenal Gland	Adrenal Gland	Training Set
GTEX.S32W.0126.SM.4AD61.1	Adrenal Gland	Adrenal Gland	Training Set
GTEX.146FR.1526.SM.5SIB8.1	Adrenal Gland	Adrenal Gland	Training Set
GTEX.X4LF.0126.SM.4QAS7.1	Adrenal Gland	Adrenal Gland	Training Set
GTEX.132NY.2226.SM.5J2LZ.1	Adrenal Gland	Adrenal Gland	Training Set
GTEX.V955.0126.SM.4JBH5.1	Adrenal Gland	Adrenal Gland	Training Set
GTEX.WFG8.0126.SM.4LVMH.1	Adrenal Gland	Adrenal Gland	Training Set
GTEX.13FH7.0226.SM.5IFGG.1	Adrenal Gland	Adrenal Gland	Training Set
GTEX.ZYWO.0126.SM.5GZWQ.1	Adrenal Gland	Adrenal Gland	Training Set
GTEX.Y114.0526.SM.4TT8V.1	Adrenal Gland	Adrenal Gland	Training Set
GTEX.XV7Q.0226.SM.4BRVL.1	Adrenal Gland	Adrenal Gland	Training Set
GTEX.PW2O.0226.SM.48TC7.1	Adrenal Gland	Adrenal Gland	Training Set
GTEX.S341.0126.SM.4AD64.1	Adrenal Gland	Adrenal Gland	Training Set
GTEX.1211K.0126.SM.59HJE.1	Adrenal Gland	Adrenal Gland	Training Set
GTEX.13FTW.0126.SM.5IJED.1	Adrenal Gland	Adrenal Gland	Training Set
GTEX.QXCU.1326.SM.48FE2.1	Adrenal Gland	Adrenal Gland	Training Set
GTEX.Y5V5.1326.SM.4V6G9.1	Adrenal Gland	Adrenal Gland	Training Set
GTEX.Q2AI.0226.SM.48U1D.1	Adrenal Gland	Adrenal Gland	Training Set
GTEX.VJYA.0526.SM.4KL1R.1	Adrenal Gland	Adrenal Gland	Training Set
GTEX.W5WG.1126.SM.4LMK4.1	Adrenal Gland	Adrenal Gland	Training Set
GTEX.ZYVF.1626.SM.5N9EH.1	Adrenal Gland	Adrenal Gland	Training Set
GTEX.1339X.0826.SM.5J2O6.1	Adrenal Gland	Adrenal Gland	Training Set
GTEX.12WSL.0326.SM.5CVMK.1	Adrenal Gland	Adrenal Gland	Training Set
GTEX.13N11.0826.SM.5IJFP.1	Adrenal Gland	Adrenal Gland	Training Set
GTEX.OIZH.1326.SM.3NB1H.1	Adrenal Gland	Adrenal Gland	Training Set
GTEX.U4B1.0126.SM.4DXSN.1	Adrenal Gland	Adrenal Gland	Training Set
GTEX.14DAQ.1826.SM.5S2VV.1	Adrenal Gland	Adrenal Gland	Training Set
GTEX.111CU.0126.SM.5GZWZ.1	Adrenal Gland	Adrenal Gland	Training Set
GTEX.11XUK.0126.SM.5CVLK.1	Adrenal Gland	Adrenal Gland	Training Set
GTEX.11EQ9.0126.SM.5986I.1	Adrenal Gland	Adrenal Gland	Training Set
GTEX.OHPL.1326.SM.3MJGG.1	Adrenal Gland	Adrenal Gland	Training Set
GTEX.XMK1.0226.SM.4B65D.1	Adrenal Gland	Adrenal Gland	Training Set
GTEX.XUZC.0226.SM.4BOO7.1	Adrenal Gland	Adrenal Gland	Training Set
GTEX.13QBU.0526.SM.5IJFE.1	Adrenal Gland	Adrenal Gland	Training Set
GTEX.13W3W.1326.SM.5LU4T.1	Adrenal Gland	Adrenal Gland	Training Set
GTEX.V1D1.0226.SM.4JBHG.1	Adrenal Gland	Adrenal Gland	Training Set
GTEX.13PL7.1026.SM.5MR5C.1	Adrenal Gland	Adrenal Gland	Training Set
GTEX.11DXX.0126.SM.5EGH7.1	Adrenal Gland	Adrenal Gland	Training Set
GTEX.14C38.1726.SM.5RQJC.1	Adrenal Gland	Adrenal Gland	Training Set
GTEX.132AR.1726.SM.5EGHQ.1	Adrenal Gland	Adrenal Gland	Training Set
GTEX.147F4.2526.SM.5NQBB.1	Adrenal Gland	Adrenal Gland	Training Set
GTEX.P4QS.1326.SM.3NMCD.1	Adrenal Gland	Adrenal Gland	Training Set
GTEX.ZY6K.0126.SM.5SIAM.1	Adrenal Gland	Adrenal Gland	Training Set
GTEX.11DXZ.0226.SM.5EGGZ.1	Adrenal Gland	Adrenal Gland	Training Set
GTEX.Y5V6.1926.SM.5IFIL.1	Adrenal Gland	Adrenal Gland	Training Set
GTEX.XYKS.0926.SM.4BRVG.1	Adrenal Gland	Adrenal Gland	Training Set
GTEX.Y5LM.0126.SM.4VBRL.1	Adrenal Gland	Adrenal Gland	Training Set
GTEX.PLZ6.0226.SM.3P61I.3	Adrenal Gland	Adrenal Gland	Training Set
GTEX.QLQW.0226.SM.447BJ.1	Adrenal Gland	Adrenal Gland	Training Set
GTEX.14H4A.0226.SM.5SI6Q.1	Adrenal Gland	Adrenal Gland	Training Set
GTEX.12WSN.0926.SM.5GCN1.1	Adrenal Gland	Adrenal Gland	Training Set
GTEX.12BJ1.0526.SM.5FQUD.1	Adrenal Gland	Adrenal Gland	Training Set
GTEX.1399U.0226.SM.5P9J2.1	Adrenal Gland	Adrenal Gland	Training Set
GTEX.S3XE.0126.SM.4AD4R.1	Adrenal Gland	Adrenal Gland	Training Set
GTEX.NFK9.1726.SM.3TW8P.1	Adrenal Gland	Adrenal Gland	Training Set
GTEX.14753.1726.SM.5NQ9X.1	Adrenal Gland	Adrenal Gland	Training Set
GTEX.14E1K.0626.SM.5S2PG.1	Adrenal Gland	Adrenal Gland	Training Set
GTEX.VUSG.1526.SM.4KKZH.1	Adrenal Gland	Adrenal Gland	Training Set
GTEX.R53T.0226.SM.48FEH.1	Adrenal Gland	Adrenal Gland	Training Set
GTEX.139YR.0126.SM.5IJEY.1	Adrenal Gland	Adrenal Gland	Training Set
GTEX.PX3G.1326.SM.48U18.1	Adrenal Gland	Adrenal Gland	Training Set
GTEX.13O1R.2326.SM.5IJF9.1	Adrenal Gland	Adrenal Gland	Training Set
GTEX.ZUA1.1926.SM.5E45E.1	Adrenal Gland	Adrenal Gland	Training Set
GTEX.13O61.0126.SM.5KM4P.1	Adrenal Gland	Adrenal Gland	Training Set
GTEX.12ZZZ.0926.SM.5N9EQ.1	Adrenal Gland	Adrenal Gland	Training Set
GTEX.TKQ2.0226.SM.4DM6V.1	Adrenal Gland	Adrenal Gland	Training Set
GTEX.11EM3.0326.SM.5A5KJ.1	Adrenal Gland	Adrenal Gland	Training Set
GTEX.QLQ7.0126.SM.4R1JW.1	Adrenal Gland	Adrenal Gland	Training Set
GTEX.13O21.0126.SM.5IJE8.1	Adrenal Gland	Adrenal Gland	Training Set
GTEX.13O3O.1626.SM.5KM1O.1	Adrenal Gland	Adrenal Gland	Training Set
GTEX.12WSD.2126.SM.5LZWK.1	Adrenal Gland	Adrenal Gland	Training Set
GTEX.1122O.0326.SM.5H124.1	Adrenal Gland	Adrenal Gland	Training Set
GTEX.131YS.2026.SM.5P9J8.1	Adrenal Gland	Adrenal Gland	Training Set
GTEX.T6MO.0126.SM.4DM6X.1	Adrenal Gland	Adrenal Gland	Training Set
GTEX.YB5E.0226.SM.5IFHI.1	Adrenal Gland	Adrenal Gland	Training Set
GTEX.XUJ4.0126.SM.4BOP7.1	Adrenal Gland	Adrenal Gland	Training Set
GTEX.OOBK.3125.SM.3LK5R.1	Adrenal Gland	Adrenal Gland	Training Set
GTEX.ZT9X.0126.SM.4YCFC.1	Adrenal Gland	Adrenal Gland	Training Set
GTEX.ZF2S.0126.SM.4WKFO.1	Adrenal Gland	Adrenal Gland	Training Set
GTEX.WYVS.0226.SM.4ONDK.1	Adrenal Gland	Adrenal Gland	Training Set
GTEX.WQUQ.0126.SM.4OOSS.1	Adrenal Gland	Adrenal Gland	Training Set
GTEX.11I78.1826.SM.5A5M4.1	Adrenal Gland	Adrenal Gland	Training Set
GTEX.PLZ6.0226.SM.3P61I.1	Adrenal Gland	Adrenal Gland	Training Set
GTEX.13OW7.2726.SM.5L3HN.1	Adrenal Gland	Adrenal Gland	Training Set
GTEX.QCQG.0126.SM.48U27.1	Adrenal Gland	Adrenal Gland	Training Set
GTEX.PLZ6.0226.SM.3P61I.2	Adrenal Gland	Adrenal Gland	Training Set
GTEX.SUCS.0526.SM.4DM56.1	Adrenal Gland	Adrenal Gland	Training Set
GTEX.OXRK.0126.SM.3NB1E.1	Adrenal Gland	Adrenal Gland	Training Set
GTEX.QDVJ.1126.SM.48U1U.1	Adrenal Gland	Adrenal Gland	Training Set
GTEX.13OVI.1226.SM.5J2ME.1	Adrenal Gland	Adrenal Gland	Training Set
GTEX.14A5I.2126.SM.5NQA8.1	Adrenal Gland	Adrenal Gland	Training Set
GTEX.TMMY.0126.SM.4DXTP.1	Adrenal Gland	Adrenal Gland	Training Set
GTEX.13CF3.0126.SM.5IFFM.1	Adrenal Gland	Adrenal Gland	Training Set
GTEX.1399R.0326.SM.5KM1X.1	Adrenal Gland	Adrenal Gland	Training Set
GTEX.117YX.0126.SM.5EGH5.1	Adrenal Gland	Adrenal Gland	Training Set
GTEX.PLZ5.0326.SM.3P614.1	Adrenal Gland	Adrenal Gland	Training Set
GTEX.ZLFU.0826.SM.4WWBP.1	Adrenal Gland	Adrenal Gland	Training Set
GTEX.145MN.0226.SM.5QGPY.1	Adrenal Gland	Adrenal Gland	Training Set
GTEX.RWSA.1726.SM.47JX7.1	Adrenal Gland	Adrenal Gland	Training Set
GTEX.RM2N.0126.SM.48FDD.1	Adrenal Gland	Adrenal Gland	Training Set
GTEX.S4Q7.0226.SM.4AD5O.1	Adrenal Gland	Adrenal Gland	Training Set
GTEX.ZLWG.0126.SM.4WWC5.1	Adrenal Gland	Adrenal Gland	Training Set
GTEX.ZP4G.0126.SM.4YCE3.1	Adrenal Gland	Adrenal Gland	Training Set
GTEX.132QS.0126.SM.5IFH9.1	Adrenal Gland	Adrenal Gland	Training Set
GTEX.13111.0326.SM.5DUXF.1	Adrenal Gland	Adrenal Gland	Training Set
GTEX.R55C.0226.SM.48FEO.1	Adrenal Gland	Adrenal Gland	Training Set
GTEX.1399S.0426.SM.5IFG5.1	Adrenal Gland	Adrenal Gland	Training Set
GTEX.111YS.0126.SM.5987T.1	Adrenal Gland	Adrenal Gland	Training Set
GTEX.Q734.0126.SM.48U1E.1	Adrenal Gland	Adrenal Gland	Training Set
GTEX.14BMU.0126.SM.5S2Q9.1	Adrenal Gland	Adrenal Gland	Training Set
GTEX.13PVR.0226.SM.5RQJI.1	Adrenal Gland	Adrenal Gland	Training Set
GTEX.REY6.1726.SM.48FDL.1	Adrenal Gland	Adrenal Gland	Training Set
GTEX.ZZPU.1226.SM.5N9CK.1	Adrenal Gland	Adrenal Gland	Training Set
GTEX.12WSK.0326.SM.5GCOJ.1	Adrenal Gland	Adrenal Gland	Training Set
GTEX.11EMC.0526.SM.5EGJN.1	Adrenal Gland	Adrenal Gland	Training Set
GTEX.WHPG.1526.SM.4M1ZK.1	Adrenal Gland	Adrenal Gland	Training Set
GTEX.YF7O.0126.SM.5IFIR.1	Adrenal Gland	Adrenal Gland	Training Set
GTEX.11GSP.0326.SM.5A5KW.1	Adrenal Gland	Adrenal Gland	Training Set
GTEX.ZTSS.0326.SM.5987M.1	Adrenal Gland	Adrenal Gland	Training Set
GTEX.U3ZM.0226.SM.4DXTA.1	Adrenal Gland	Adrenal Gland	Training Set
GTEX.12WSG.0726.SM.5EGIG.1	Adrenal Gland	Adrenal Gland	Training Set
GTEX.R55G.0126.SM.48FDS.1	Adrenal Gland	Adrenal Gland	Training Set
GTEX.XQ3S.1726.SM.4BOOD.1	Adrenal Gland	Adrenal Gland	Training Set
GTEX.YFCO.0126.SM.4W1YT.1	Adrenal Gland	Adrenal Gland	Training Set
GTEX.11TT1.0126.SM.5LUAA.1	Adrenal Gland	Adrenal Gland	Training Set
GTEX.QMRM.0126.SM.4R1K9.1	Adrenal Gland	Adrenal Gland	Training Set
GTEX.PWCY.0226.SM.48TD8.1	Adrenal Gland	Adrenal Gland	Training Set
GTEX.O5YT.1326.SM.3MJGR.1	Adrenal Gland	Adrenal Gland	Training Set
GTEX.OHPK.1326.SM.3MJGN.1	Adrenal Gland	Adrenal Gland	Training Set
GTEX.U3ZN.0826.SM.4DXSZ.1	Adrenal Gland	Adrenal Gland	Training Set
GTEX.UJMC.0226.SM.4IHLH.1	Adrenal Gland	Adrenal Gland	Training Set
GTEX.Q2AH.0126.SM.48U2B.1	Adrenal Gland	Adrenal Gland	Training Set
GTEX.11P7K.0126.SM.5986E.1	Adrenal Gland	Adrenal Gland	Training Set
GTEX.11NSD.0226.SM.5A5LR.1	Adrenal Gland	Adrenal Gland	Training Set
GTEX.ZEX8.0626.SM.DO118.1	Adrenal Gland	Adrenal Gland	Training Set
GTEX.1AX9K.0126.SM.7PC1B.1	Adrenal Gland	Adrenal Gland	Training Set
GTEX.14PJ4.0426.SM.6871F.1	Adrenal Gland	Adrenal Gland	Training Set
GTEX.QMRM.0126.SM.CJI1R.1	Adrenal Gland	Adrenal Gland	Training Set
GTEX.14JG6.0126.SM.68726.1	Adrenal Gland	Adrenal Gland	Training Set
GTEX.1I1GU.0226.SM.AHZ2J.1	Adrenal Gland	Adrenal Gland	Training Set
GTEX.1ICG6.0226.SM.AHZ2P.1	Adrenal Gland	Adrenal Gland	Training Set
GTEX.1IKK5.1026.SM.AHZ2V.1	Adrenal Gland	Adrenal Gland	Training Set
GTEX.1QP2A.2626.SM.EAZ3L.1	Adrenal Gland	Adrenal Gland	Training Set
GTEX.1KWVE.0726.SM.D4P3O.1	Adrenal Gland	Adrenal Gland	Training Set
GTEX.1LG7Z.0426.SM.D4P47.1	Adrenal Gland	Adrenal Gland	Training Set
GTEX.1QMI2.1926.SM.EAZ4B.1	Adrenal Gland	Adrenal Gland	Training Set
GTEX.1JKYN.0126.SM.AHZ4C.1	Adrenal Gland	Adrenal Gland	Training Set
GTEX.QLQ7.0126.SM.CL55R.1	Adrenal Gland	Adrenal Gland	Training Set
GTEX.18A6Q.1826.SM.72D6I.1	Adrenal Gland	Adrenal Gland	Training Set
GTEX.16NGA.0126.SM.72D6U.1	Adrenal Gland	Adrenal Gland	Training Set
GTEX.15DYW.2126.SM.6M47B.1	Adrenal Gland	Adrenal Gland	Training Set
GTEX.1AX8Z.2426.SM.72D7D.1	Adrenal Gland	Adrenal Gland	Training Set
GTEX.15ER7.1126.SM.6M47F.1	Adrenal Gland	Adrenal Gland	Training Set
GTEX.1I1GQ.2026.SM.ARU7F.1	Adrenal Gland	Adrenal Gland	Training Set
GTEX.1AX9J.0626.SM.72D7L.1	Adrenal Gland	Adrenal Gland	Training Set
GTEX.1RQEC.1926.SM.DTX7M.1	Adrenal Gland	Adrenal Gland	Training Set
GTEX.1HC8U.0226.SM.9WG7Q.1	Adrenal Gland	Adrenal Gland	Training Set
GTEX.OIZF.1326.SM.7SB8E.1	Adrenal Gland	Adrenal Gland	Training Set
GTEX.15EU6.0326.SM.6M48I.1	Adrenal Gland	Adrenal Gland	Training Set
GTEX.15CHR.0626.SM.7938V.1	Adrenal Gland	Adrenal Gland	Training Set
GTEX.1CAMR.0126.SM.79391.1	Adrenal Gland	Adrenal Gland	Training Set
GTEX.1CAMS.0226.SM.79397.1	Adrenal Gland	Adrenal Gland	Training Set
GTEX.17HHE.0226.SM.79399.1	Adrenal Gland	Adrenal Gland	Training Set
GTEX.1B8KE.0926.SM.7189I.1	Adrenal Gland	Adrenal Gland	Training Set
GTEX.1S82P.1126.SM.EV79M.1	Adrenal Gland	Adrenal Gland	Training Set
GTEX.1H3NZ.2026.SM.A8N9P.1	Adrenal Gland	Adrenal Gland	Training Set
GTEX.1PPH8.0826.SM.DTX9T.1	Adrenal Gland	Adrenal Gland	Training Set
GTEX.16AAH.0226.SM.793A8.1	Adrenal Gland	Adrenal Gland	Training Set
GTEX.1KXAM.0326.SM.EV7AQ.1	Adrenal Gland	Adrenal Gland	Training Set
GTEX.14PJM.2226.SM.6AJAT.1	Adrenal Gland	Adrenal Gland	Training Set
GTEX.1M5QR.1726.SM.EV7AU.1	Adrenal Gland	Adrenal Gland	Training Set
GTEX.1A32A.2126.SM.718AZ.1	Adrenal Gland	Adrenal Gland	Training Set
GTEX.1KANB.2626.SM.EV7BF.1	Adrenal Gland	Adrenal Gland	Training Set
GTEX.1RAZQ.0226.SM.EV7BK.1	Adrenal Gland	Adrenal Gland	Training Set
GTEX.1C475.0126.SM.731DC.1	Adrenal Gland	Adrenal Gland	Training Set
GTEX.1A3MW.2126.SM.731DO.1	Adrenal Gland	Adrenal Gland	Training Set
GTEX.1AMFI.0626.SM.731DR.1	Adrenal Gland	Adrenal Gland	Training Set
GTEX.16MT8.1626.SM.7EWDW.1	Adrenal Gland	Adrenal Gland	Training Set
GTEX.1F5PL.2326.SM.7MKFC.1	Adrenal Gland	Adrenal Gland	Training Set
GTEX.1A3MV.0226.SM.731FS.1	Adrenal Gland	Adrenal Gland	Training Set
GTEX.1EKGG.2126.SM.7MKFT.1	Adrenal Gland	Adrenal Gland	Training Set
GTEX.1KD4Q.1826.SM.DIPFV.1	Adrenal Gland	Adrenal Gland	Training Set
GTEX.1H1E6.1026.SM.9JGFZ.1	Adrenal Gland	Adrenal Gland	Training Set
GTEX.1F88F.1526.SM.9JGG1.1	Adrenal Gland	Adrenal Gland	Training Set
GTEX.1B8L1.1326.SM.7MKG6.1	Adrenal Gland	Adrenal Gland	Training Set
GTEX.1BAJH.2626.SM.7EPG6.1	Adrenal Gland	Adrenal Gland	Training Set
GTEX.1B996.2026.SM.7MKG7.1	Adrenal Gland	Adrenal Gland	Training Set
GTEX.1H11D.2426.SM.9JGGN.1	Adrenal Gland	Adrenal Gland	Training Set
GTEX.OIZF.1326.SM.3MJGU.1	Adrenal Gland	Adrenal Gland	Training Set
GTEX.1K2DA.0226.SM.CGQGW.1	Adrenal Gland	Adrenal Gland	Training Set
GTEX.1CB4F.0126.SM.9JGGZ.1	Adrenal Gland	Adrenal Gland	Training Set
GTEX.R55E.1826.SM.EXOHD.1	Adrenal Gland	Adrenal Gland	Training Set
GTEX.ZUA1.0002.SM.4YCF7.1	Blood	Cells - EBV-transformed lymphocytes	Training Set
GTEX.V955.0005.SM.3P5ZC.1	Blood	Whole Blood	Training Set
GTEX.X4EO.0004.SM.4QARM.1	Blood	Cells - EBV-transformed lymphocytes	Training Set
GTEX.13O61.0005.SM.5O9AU.1	Blood	Whole Blood	Training Set
GTEX.ZTSS.0004.SM.4YCCS.1	Blood	Cells - EBV-transformed lymphocytes	Training Set
GTEX.PX3G.0006.SM.2I3E4.1	Blood	Whole Blood	Training Set
GTEX.ZV7C.0003.SM.4YCF6.1	Blood	Cells - EBV-transformed lymphocytes	Training Set
GTEX.S33H.0005.SM.2XCAL.1	Blood	Whole Blood	Training Set
GTEX.X88G.0004.SM.47JZ6.1	Blood	Cells - EBV-transformed lymphocytes	Training Set
GTEX.11P7K.0006.SM.5N9FM.1	Blood	Whole Blood	Training Set
GTEX.ZC5H.0005.SM.4WAXM.1	Blood	Whole Blood	Training Set
GTEX.S4Z8.0006.SM.3K2AQ.1	Blood	Whole Blood	Training Set
GTEX.V955.0005.SM.3P5ZC.2	Blood	Whole Blood	Training Set
GTEX.Y5LM.0005.SM.4V6EJ.1	Blood	Whole Blood	Training Set
GTEX.SIU7.0006.SM.2XCE6.1	Blood	Whole Blood	Training Set
GTEX.PW2O.0006.SM.2I3DV.1	Blood	Whole Blood	Training Set
GTEX.14BIL.0006.SM.5N9F2.1	Blood	Whole Blood	Training Set
GTEX.13113.0006.SM.5NQ7X.1	Blood	Whole Blood	Training Set
GTEX.PLZ5.0006.SM.2S1NZ.1	Blood	Whole Blood	Training Set
GTEX.WH7G.0002.SM.4LVN9.1	Blood	Cells - EBV-transformed lymphocytes	Training Set
GTEX.ZQUD.0005.SM.4YCE5.1	Blood	Whole Blood	Training Set
GTEX.XXEK.0005.SM.4BRWJ.1	Blood	Whole Blood	Training Set
GTEX.QVUS.0006.SM.3GAE8.1	Blood	Whole Blood	Training Set
GTEX.OHPN.0005.SM.2YUML.1	Blood	Whole Blood	Training Set
GTEX.Z93S.0005.SM.4RGLW.1	Blood	Whole Blood	Training Set
GTEX.1212Z.0002.SM.5SI6W.1	Blood	Cells - EBV-transformed lymphocytes	Training Set
GTEX.12C56.0002.SM.5S2PC.1	Blood	Cells - EBV-transformed lymphocytes	Training Set
GTEX.ZQG8.0005.SM.4YCEH.1	Blood	Whole Blood	Training Set
GTEX.13CZV.0006.SM.5P9IN.1	Blood	Whole Blood	Training Set
GTEX.1269C.0005.SM.5N9CJ.1	Blood	Whole Blood	Training Set
GTEX.X261.0005.SM.4PQYX.1	Blood	Whole Blood	Training Set
GTEX.U3ZG.0001.SM.47JYF.1	Blood	Cells - EBV-transformed lymphocytes	Training Set
GTEX.WFON.0001.SM.5S2SE.1	Blood	Cells - EBV-transformed lymphocytes	Training Set
GTEX.YBZK.0005.SM.59HKG.1	Blood	Whole Blood	Training Set
GTEX.13VXU.0006.SM.5N9FF.1	Blood	Whole Blood	Training Set
GTEX.12C56.0006.SM.5N9E9.1	Blood	Whole Blood	Training Set
GTEX.XLM4.0005.SM.4AT4P.1	Blood	Whole Blood	Training Set
GTEX.11OF3.0006.SM.5O9CM.1	Blood	Whole Blood	Training Set
GTEX.11EQ9.0006.SM.5LUB6.1	Blood	Whole Blood	Training Set
GTEX.PLZ5.0006.SM.5S2W5.1	Blood	Whole Blood	Training Set
GTEX.TKQ2.0006.SM.33HBH.1	Blood	Whole Blood	Training Set
GTEX.RVPU.0005.SM.2TF6L.1	Blood	Whole Blood	Training Set
GTEX.ZPU1.0006.SM.4WWAT.1	Blood	Whole Blood	Training Set
GTEX.XMK1.0001.SM.4B64F.1	Blood	Cells - EBV-transformed lymphocytes	Training Set
GTEX.Y8E4.0003.SM.4V6FY.1	Blood	Cells - EBV-transformed lymphocytes	Training Set
GTEX.Y8DK.0004.SM.4RGM7.1	Blood	Cells - EBV-transformed lymphocytes	Training Set
GTEX.ZVT2.0005.SM.57WBW.1	Blood	Whole Blood	Training Set
GTEX.U3ZG.0006.SM.47JWX.1	Blood	Whole Blood	Training Set
GTEX.WHPG.0004.SM.3NMDO.1	Blood	Cells - EBV-transformed lymphocytes	Training Set
GTEX.WEY5.0006.SM.3GIKG.1	Blood	Whole Blood	Training Set
GTEX.Y111.0006.SM.4SOIO.1	Blood	Whole Blood	Training Set
GTEX.ZT9W.0005.SM.4YCEG.1	Blood	Whole Blood	Training Set
GTEX.W5X1.0001.SM.3P61V.1	Blood	Cells - EBV-transformed lymphocytes	Training Set
GTEX.XQ3S.0001.SM.4B64K.1	Blood	Cells - EBV-transformed lymphocytes	Training Set
GTEX.RWS6.0001.SM.3NMAL.1	Blood	Cells - EBV-transformed lymphocytes	Training Set
GTEX.12WSB.0006.SM.5O998.1	Blood	Whole Blood	Training Set
GTEX.1399R.0006.SM.5N9FR.1	Blood	Whole Blood	Training Set
GTEX.ZTX8.0006.SM.4YCE4.1	Blood	Whole Blood	Training Set
GTEX.OHPJ.0006.SM.3LK6G.1	Blood	Whole Blood	Training Set
GTEX.WWYW.0005.SM.3NB3K.1	Blood	Whole Blood	Training Set
GTEX.13FTY.0005.SM.5NQ78.1	Blood	Whole Blood	Training Set
GTEX.ZF29.0006.SM.4WKGQ.1	Blood	Whole Blood	Training Set
GTEX.11ZTT.0002.SM.5S2PA.1	Blood	Cells - EBV-transformed lymphocytes	Training Set
GTEX.ZF3C.0005.SM.4WWAR.1	Blood	Whole Blood	Training Set
GTEX.U412.0006.SM.3DB8J.1	Blood	Whole Blood	Training Set
GTEX.XV7Q.0005.SM.4BRWI.1	Blood	Whole Blood	Training Set
GTEX.RU72.0006.SM.2TF65.1	Blood	Whole Blood	Training Set
GTEX.ZV68.0006.SM.4YCEJ.1	Blood	Whole Blood	Training Set
GTEX.RNOR.0005.SM.2TF4Z.1	Blood	Whole Blood	Training Set
GTEX.TSE9.0005.SM.4DXUF.1	Blood	Whole Blood	Training Set
GTEX.147JS.0006.SM.5NQ7K.1	Blood	Whole Blood	Training Set
GTEX.12696.0002.SM.5SI6U.1	Blood	Cells - EBV-transformed lymphocytes	Training Set
GTEX.11DXZ.0006.SM.5LZZH.1	Blood	Whole Blood	Training Set
GTEX.WYBS.0005.SM.4ONDR.1	Blood	Whole Blood	Training Set
GTEX.XBED.0003.SM.47JWP.1	Blood	Cells - EBV-transformed lymphocytes	Training Set
GTEX.WFG8.0006.SM.3GIKS.1	Blood	Whole Blood	Training Set
GTEX.XQ3S.0006.SM.4BOQ4.1	Blood	Whole Blood	Training Set
GTEX.1192W.0005.SM.5NQBQ.1	Blood	Whole Blood	Training Set
GTEX.13OVK.0006.SM.5O9B7.1	Blood	Whole Blood	Training Set
GTEX.R53T.0005.SM.3GADK.1	Blood	Whole Blood	Training Set
GTEX.12WSN.0006.SM.5NQAP.1	Blood	Whole Blood	Training Set
GTEX.14AS3.0006.SM.5NQC2.1	Blood	Whole Blood	Training Set
GTEX.13OVL.0006.SM.5O996.1	Blood	Whole Blood	Training Set
GTEX.ZDTS.0001.SM.4WAXW.1	Blood	Cells - EBV-transformed lymphocytes	Training Set
GTEX.WCDI.0002.SM.3P61U.1	Blood	Cells - EBV-transformed lymphocytes	Training Set
GTEX.YB5K.0005.SM.4VDSP.1	Blood	Whole Blood	Training Set
GTEX.13FTX.0005.SM.5N9F6.1	Blood	Whole Blood	Training Set
GTEX.ZUA1.0005.SM.4YCEV.1	Blood	Whole Blood	Training Set
GTEX.N7MS.0007.SM.2D7W1.1	Blood	Whole Blood	Training Set
GTEX.11ZU8.0005.SM.5PNU5.1	Blood	Whole Blood	Training Set
GTEX.Y3IK.0005.SM.4WWDE.1	Blood	Whole Blood	Training Set
GTEX.Y9LG.0006.SM.4VBRK.1	Blood	Whole Blood	Training Set
GTEX.11ZUS.0006.SM.5O9AJ.1	Blood	Whole Blood	Training Set
GTEX.14E6E.0006.SM.5MR5N.1	Blood	Whole Blood	Training Set
GTEX.12696.0005.SM.5LZYS.1	Blood	Whole Blood	Training Set
GTEX.S4Q7.0006.SM.3K2AT.1	Blood	Whole Blood	Training Set
GTEX.139D8.0006.SM.5LZX8.1	Blood	Whole Blood	Training Set
GTEX.TMZS.0001.SM.3P61Q.1	Blood	Cells - EBV-transformed lymphocytes	Training Set
GTEX.11ZTT.0006.SM.5N9FX.1	Blood	Whole Blood	Training Set
GTEX.1122O.0005.SM.5O99J.1	Blood	Whole Blood	Training Set
GTEX.SIU8.0006.SM.2XCE5.1	Blood	Whole Blood	Training Set
GTEX.T5JC.0005.SM.4DM7B.1	Blood	Whole Blood	Training Set
GTEX.QESD.0006.SM.2I5G6.1	Blood	Whole Blood	Training Set
GTEX.11TTK.0005.SM.5O9BX.1	Blood	Whole Blood	Training Set
GTEX.RUSQ.0006.SM.2TF6P.1	Blood	Whole Blood	Training Set
GTEX.TMZS.0001.SM.3P61Q.2	Blood	Cells - EBV-transformed lymphocytes	Training Set
GTEX.PVOW.0006.SM.3NMB8.1	Blood	Whole Blood	Training Set
GTEX.XLM4.0005.SM.5S2RY.1	Blood	Whole Blood	Training Set
GTEX.1477Z.0005.SM.5PNWD.1	Blood	Whole Blood	Training Set
GTEX.12ZZX.0005.SM.5O9A9.1	Blood	Whole Blood	Training Set
GTEX.ZPIC.0005.SM.4WWEB.1	Blood	Whole Blood	Training Set
GTEX.OIZG.0005.SM.2HMJC.1	Blood	Whole Blood	Training Set
GTEX.SSA3.0002.SM.3P61R.1	Blood	Cells - EBV-transformed lymphocytes	Training Set
GTEX.OHPM.0006.SM.2HMKU.1	Blood	Whole Blood	Training Set
GTEX.X5EB.0004.SM.46MWA.1	Blood	Cells - EBV-transformed lymphocytes	Training Set
GTEX.14DAR.0006.SM.5N9GC.1	Blood	Whole Blood	Training Set
GTEX.VJYA.0005.SM.3P5ZD.3	Blood	Whole Blood	Training Set
GTEX.R55C.0005.SM.3GAE9.1	Blood	Whole Blood	Training Set
GTEX.X4XX.0005.SM.3NMCS.1	Blood	Whole Blood	Training Set
GTEX.SSA3.0002.SM.3P61R.2	Blood	Cells - EBV-transformed lymphocytes	Training Set
GTEX.117XS.0005.SM.5PNU6.1	Blood	Whole Blood	Training Set
GTEX.OIZF.0006.SM.2I5GQ.1	Blood	Whole Blood	Training Set
GTEX.N7MS.0007.SM.26GME.1	Blood	Whole Blood	Training Set
GTEX.11DXX.0005.SM.5NQ8B.1	Blood	Whole Blood	Training Set
GTEX.1313W.0006.SM.5O9B1.1	Blood	Whole Blood	Training Set
GTEX.WL46.0006.SM.4OOS5.1	Blood	Whole Blood	Training Set
GTEX.T5JC.0001.SM.3NMAK.1	Blood	Cells - EBV-transformed lymphocytes	Training Set
GTEX.XBED.0006.SM.47JXO.1	Blood	Whole Blood	Training Set
GTEX.ZF2S.0004.SM.4WKFE.1	Blood	Cells - EBV-transformed lymphocytes	Training Set
GTEX.XLM4.0004.SM.5S2TF.1	Blood	Cells - EBV-transformed lymphocytes	Training Set
GTEX.WYVS.0006.SM.3NMA7.1	Blood	Whole Blood	Training Set
GTEX.ZDXO.0006.SM.4WKGF.1	Blood	Whole Blood	Training Set
GTEX.U3ZH.0005.SM.3DB72.1	Blood	Whole Blood	Training Set
GTEX.QEG5.0006.SM.2I5FZ.1	Blood	Whole Blood	Training Set
GTEX.WOFM.0005.SM.3MJF3.1	Blood	Whole Blood	Training Set
GTEX.S7SE.0005.SM.2XCEA.1	Blood	Whole Blood	Training Set
GTEX.OXRK.0006.SM.2HML1.1	Blood	Whole Blood	Training Set
GTEX.ZVT4.0006.SM.57WB8.1	Blood	Whole Blood	Training Set
GTEX.WYVS.0004.SM.4ONDT.1	Blood	Cells - EBV-transformed lymphocytes	Training Set
GTEX.14C39.0005.SM.5NQBR.1	Blood	Whole Blood	Training Set
GTEX.Y5V5.0001.SM.4V6FZ.1	Blood	Cells - EBV-transformed lymphocytes	Training Set
GTEX.Y8E5.0006.SM.47JWQ.1	Blood	Whole Blood	Training Set
GTEX.11TT1.0004.SM.5S2NT.1	Blood	Cells - EBV-transformed lymphocytes	Training Set
GTEX.WWTW.0002.SM.4MVNH.1	Blood	Cells - EBV-transformed lymphocytes	Training Set
GTEX.131XG.0006.SM.5O9CE.1	Blood	Whole Blood	Training Set
GTEX.YEC3.0005.SM.4W21J.1	Blood	Whole Blood	Training Set
GTEX.R55F.0005.SM.2TF4W.1	Blood	Whole Blood	Training Set
GTEX.Y114.0006.SM.4TT76.1	Blood	Whole Blood	Training Set
GTEX.N7MS.0007.SM.26GMV.1	Blood	Whole Blood	Training Set
GTEX.ZV6S.0003.SM.4YCCT.1	Blood	Cells - EBV-transformed lymphocytes	Training Set
GTEX.T6MO.0006.SM.32QOU.1	Blood	Whole Blood	Training Set
GTEX.X3Y1.0001.SM.4PQYP.1	Blood	Cells - EBV-transformed lymphocytes	Training Set
GTEX.ZTTD.0006.SM.51MSJ.1	Blood	Whole Blood	Training Set
GTEX.1269C.0003.SM.5S2PB.1	Blood	Cells - EBV-transformed lymphocytes	Training Set
GTEX.QMRM.0005.SM.3NB2A.1	Blood	Whole Blood	Training Set
GTEX.1212Z.0006.SM.5NQ8M.1	Blood	Whole Blood	Training Set
GTEX.XUYS.0005.SM.47JZ2.1	Blood	Whole Blood	Training Set
GTEX.X5EB.0006.SM.46MV5.1	Blood	Whole Blood	Training Set
GTEX.U3ZH.0002.SM.3NMDD.1	Blood	Cells - EBV-transformed lymphocytes	Training Set
GTEX.PWOO.0006.SM.2I3E3.1	Blood	Whole Blood	Training Set
GTEX.SIU7.0001.SM.3NMAW.1	Blood	Cells - EBV-transformed lymphocytes	Training Set
GTEX.YFCO.0003.SM.4W21I.1	Blood	Cells - EBV-transformed lymphocytes	Training Set
GTEX.OXRN.0005.SM.2I5EU.1	Blood	Whole Blood	Training Set
GTEX.11VI4.0006.SM.5N9D8.1	Blood	Whole Blood	Training Set
GTEX.WHSE.0006.SM.3NMBW.1	Blood	Whole Blood	Training Set
GTEX.ZF2S.0006.SM.4WKHF.1	Blood	Whole Blood	Training Set
GTEX.1211K.0001.SM.5S2P9.1	Blood	Cells - EBV-transformed lymphocytes	Training Set
GTEX.XXEK.0004.SM.4BRWO.1	Blood	Cells - EBV-transformed lymphocytes	Training Set
GTEX.WOFM.0001.SM.4OOT2.1	Blood	Cells - EBV-transformed lymphocytes	Training Set
GTEX.QLQ7.0005.SM.2S1QP.1	Blood	Whole Blood	Training Set
GTEX.NPJ7.0006.SM.3GACR.1	Blood	Whole Blood	Training Set
GTEX.T6MN.0002.SM.5S2TI.1	Blood	Cells - EBV-transformed lymphocytes	Training Set
GTEX.PLZ4.0006.SM.2S1NY.1	Blood	Whole Blood	Training Set
GTEX.ZVZQ.0006.SM.51MR8.1	Blood	Whole Blood	Training Set
GTEX.X3Y1.0006.SM.3P5ZG.3	Blood	Whole Blood	Training Set
GTEX.XGQ4.0004.SM.4AT5S.1	Blood	Cells - EBV-transformed lymphocytes	Training Set
GTEX.NL3H.0006.SM.2I3FW.1	Blood	Whole Blood	Training Set
GTEX.XPVG.0006.SM.4B65Z.1	Blood	Whole Blood	Training Set
GTEX.P44H.0006.SM.2XCFB.1	Blood	Whole Blood	Training Set
GTEX.YEC3.0002.SM.4W1YI.1	Blood	Cells - EBV-transformed lymphocytes	Training Set
GTEX.117YW.0005.SM.5NQ8Z.1	Blood	Whole Blood	Training Set
GTEX.131XH.0006.SM.5O98V.1	Blood	Whole Blood	Training Set
GTEX.11OC5.0004.SM.5S2O6.1	Blood	Cells - EBV-transformed lymphocytes	Training Set
GTEX.ZGAY.0006.SM.4WWAQ.1	Blood	Whole Blood	Training Set
GTEX.TMZS.0001.SM.3P61Q.3	Blood	Cells - EBV-transformed lymphocytes	Training Set
GTEX.NPJ8.0007.SM.2D7VX.1	Blood	Whole Blood	Training Set
GTEX.ZXES.0004.SM.57WCW.1	Blood	Cells - EBV-transformed lymphocytes	Training Set
GTEX.QCQG.0006.SM.5SI8M.1	Blood	Whole Blood	Training Set
GTEX.12WSD.0005.SM.5N9FZ.1	Blood	Whole Blood	Training Set
GTEX.X8HC.0006.SM.46MV6.1	Blood	Whole Blood	Training Set
GTEX.11EM3.0005.SM.5N9DK.1	Blood	Whole Blood	Training Set
GTEX.X4XY.0006.SM.46MV2.1	Blood	Whole Blood	Training Set
GTEX.Q2AG.0005.SM.2HMK3.1	Blood	Whole Blood	Training Set
GTEX.RTLS.0006.SM.2TF58.1	Blood	Whole Blood	Training Set
GTEX.12WS9.0006.SM.5O99W.1	Blood	Whole Blood	Training Set
GTEX.SE5C.0006.SM.4BRW5.1	Blood	Whole Blood	Training Set
GTEX.131YS.0005.SM.5NQAS.1	Blood	Whole Blood	Training Set
GTEX.14E7W.0006.SM.5N9GG.1	Blood	Whole Blood	Training Set
GTEX.ZPU1.0004.SM.4WWAV.1	Blood	Cells - EBV-transformed lymphocytes	Training Set
GTEX.ZE9C.0006.SM.4WKG2.1	Blood	Whole Blood	Training Set
GTEX.ZPCL.0006.SM.4WWAS.1	Blood	Whole Blood	Training Set
GTEX.ZLV1.0005.SM.4WWAP.1	Blood	Whole Blood	Training Set
GTEX.X15G.0001.SM.4PQZV.1	Blood	Cells - EBV-transformed lymphocytes	Training Set
GTEX.WQUQ.0006.SM.3MJF4.1	Blood	Whole Blood	Training Set
GTEX.V1D1.0003.SM.3NMDP.1	Blood	Cells - EBV-transformed lymphocytes	Training Set
GTEX.U8T8.0005.SM.3DB8F.1	Blood	Whole Blood	Training Set
GTEX.12KS4.0005.SM.5SI94.1	Blood	Whole Blood	Training Set
GTEX.PLZ4.0006.SM.5SI8L.1	Blood	Whole Blood	Training Set
GTEX.WFG8.0001.SM.4LVN8.1	Blood	Cells - EBV-transformed lymphocytes	Training Set
GTEX.PX3G.0006.SM.5SI7E.1	Blood	Whole Blood	Training Set
GTEX.P44G.0006.SM.2TC6A.1	Blood	Whole Blood	Training Set
GTEX.ZVZP.0004.SM.51MS8.1	Blood	Cells - EBV-transformed lymphocytes	Training Set
GTEX.11ONC.0005.SM.5O9CY.1	Blood	Whole Blood	Training Set
GTEX.Q2AI.0006.SM.2I3FG.1	Blood	Whole Blood	Training Set
GTEX.VUSG.0003.SM.5S2S5.1	Blood	Cells - EBV-transformed lymphocytes	Training Set
GTEX.X4EP.0005.SM.3P5ZE.3	Blood	Whole Blood	Training Set
GTEX.ZF29.0002.SM.4WKF2.1	Blood	Cells - EBV-transformed lymphocytes	Training Set
GTEX.TKQ1.0003.SM.3NMAE.1	Blood	Cells - EBV-transformed lymphocytes	Training Set
GTEX.TMKS.0005.SM.5SI7W.1	Blood	Whole Blood	Training Set
GTEX.11EI6.0005.SM.5N9GN.1	Blood	Whole Blood	Training Set
GTEX.NPJ8.0007.SM.26GMW.1	Blood	Whole Blood	Training Set
GTEX.P4PQ.0005.SM.2HMKJ.1	Blood	Whole Blood	Training Set
GTEX.147GR.0005.SM.5NQAO.1	Blood	Whole Blood	Training Set
GTEX.OOBK.0005.SM.2YUMG.1	Blood	Whole Blood	Training Set
GTEX.ZLWG.0004.SM.4WWD5.1	Blood	Cells - EBV-transformed lymphocytes	Training Set
GTEX.12WSL.0005.SM.5NQAD.1	Blood	Whole Blood	Training Set
GTEX.UPJH.0006.SM.3GACW.1	Blood	Whole Blood	Training Set
GTEX.WY7C.0006.SM.3NB3L.1	Blood	Whole Blood	Training Set
GTEX.ZDTT.0006.SM.4WKFP.1	Blood	Whole Blood	Training Set
GTEX.PSDG.0005.SM.3GADC.1	Blood	Whole Blood	Training Set
GTEX.X4EP.0004.SM.4PQZX.1	Blood	Cells - EBV-transformed lymphocytes	Training Set
GTEX.11EQ8.0006.SM.5P9HJ.1	Blood	Whole Blood	Training Set
GTEX.ZTX8.0002.SM.4YCEU.1	Blood	Cells - EBV-transformed lymphocytes	Training Set
GTEX.139TT.0006.SM.5O9CG.1	Blood	Whole Blood	Training Set
GTEX.WI4N.0005.SM.3LK7E.1	Blood	Whole Blood	Training Set
GTEX.14A5H.0006.SM.5O9AI.1	Blood	Whole Blood	Training Set
GTEX.12WSF.0005.SM.5NQAQ.1	Blood	Whole Blood	Training Set
GTEX.TKQ2.0004.SM.3NMAC.1	Blood	Cells - EBV-transformed lymphocytes	Training Set
GTEX.WH7G.0005.SM.3NMBX.1	Blood	Whole Blood	Training Set
GTEX.12584.0005.SM.5N9GM.1	Blood	Whole Blood	Training Set
GTEX.14ABY.0005.SM.5O99U.1	Blood	Whole Blood	Training Set
GTEX.ZQUD.0003.SM.4YCD3.1	Blood	Cells - EBV-transformed lymphocytes	Training Set
GTEX.14H4A.0006.SM.5N9E3.1	Blood	Whole Blood	Training Set
GTEX.PWCY.0005.SM.2I3E2.1	Blood	Whole Blood	Training Set
GTEX.VJYA.0001.SM.3NMDJ.1	Blood	Cells - EBV-transformed lymphocytes	Training Set
GTEX.YB5K.0003.SM.4VDSN.1	Blood	Cells - EBV-transformed lymphocytes	Training Set
GTEX.Y3I4.0006.SM.4TT1E.1	Blood	Whole Blood	Training Set
GTEX.WHWD.0005.SM.3LK7D.1	Blood	Whole Blood	Training Set
GTEX.12WSA.0005.SM.5O9BM.1	Blood	Whole Blood	Training Set
GTEX.139T6.0006.SM.5LU92.1	Blood	Whole Blood	Training Set
GTEX.Q734.0006.SM.2I3FJ.1	Blood	Whole Blood	Training Set
GTEX.131XE.0006.SM.5P9F9.1	Blood	Whole Blood	Training Set
GTEX.1399Q.0005.SM.5NQAG.1	Blood	Whole Blood	Training Set
GTEX.X3Y1.0006.SM.3P5ZG.1	Blood	Whole Blood	Training Set
GTEX.X3Y1.0006.SM.3P5ZG.2	Blood	Whole Blood	Training Set
GTEX.13S86.0005.SM.5NQ7I.1	Blood	Whole Blood	Training Set
GTEX.NPJ8.0007.SM.26GMF.1	Blood	Whole Blood	Training Set
GTEX.1399U.0005.SM.5NQ8K.1	Blood	Whole Blood	Training Set
GTEX.132AR.0006.SM.5NQ7N.1	Blood	Whole Blood	Training Set
GTEX.XUJ4.0005.SM.4BOQ6.1	Blood	Whole Blood	Training Set
GTEX.P4PP.0005.SM.2HMKX.1	Blood	Whole Blood	Training Set
GTEX.SNMC.0006.SM.2XCFE.1	Blood	Whole Blood	Training Set
GTEX.14B4R.0006.SM.5O9A7.1	Blood	Whole Blood	Training Set
GTEX.S4UY.0006.SM.3K2A7.1	Blood	Whole Blood	Training Set
GTEX.XXEK.0005.SM.5S2TG.1	Blood	Whole Blood	Training Set
GTEX.11TT1.0005.SM.5NQ8Y.1	Blood	Whole Blood	Training Set
GTEX.11P7K.0003.SM.5S2OU.1	Blood	Cells - EBV-transformed lymphocytes	Training Set
GTEX.132Q8.0006.SM.5NQA4.1	Blood	Whole Blood	Training Set
GTEX.RWSA.0005.SM.2XCAO.1	Blood	Whole Blood	Training Set
GTEX.QLQW.0005.SM.2S1RA.1	Blood	Whole Blood	Training Set
GTEX.P4QR.0006.SM.2I5GN.1	Blood	Whole Blood	Training Set
GTEX.11WQK.0005.SM.5O9AV.1	Blood	Whole Blood	Training Set
GTEX.11XUK.0005.SM.5LU9F.1	Blood	Whole Blood	Training Set
GTEX.WEY5.0001.SM.3P61Z.3	Blood	Cells - EBV-transformed lymphocytes	Training Set
GTEX.113IC.0006.SM.5NQ9C.1	Blood	Whole Blood	Training Set
GTEX.XBEC.0006.SM.4AT5T.1	Blood	Whole Blood	Training Set
GTEX.WRHU.0006.SM.3MJF6.1	Blood	Whole Blood	Training Set
GTEX.ZVT3.0006.SM.51MT9.1	Blood	Whole Blood	Training Set
GTEX.12ZZW.0005.SM.5O9BY.1	Blood	Whole Blood	Training Set
GTEX.OIZH.0005.SM.2HMJN.1	Blood	Whole Blood	Training Set
GTEX.13G51.0005.SM.5N9EP.1	Blood	Whole Blood	Training Set
GTEX.O5YW.0006.SM.3LK6E.1	Blood	Whole Blood	Training Set
GTEX.11EQ9.0002.SM.5QGQ1.1	Blood	Cells - EBV-transformed lymphocytes	Training Set
GTEX.11NSD.0005.SM.5LZZ5.1	Blood	Whole Blood	Training Set
GTEX.NFK9.0006.SM.3GACS.1	Blood	Whole Blood	Training Set
GTEX.SN8G.0001.SM.3NM8L.1	Blood	Cells - EBV-transformed lymphocytes	Training Set
GTEX.T5JW.0005.SM.3GADE.1	Blood	Whole Blood	Training Set
GTEX.X88G.0006.SM.47JX5.1	Blood	Whole Blood	Training Set
GTEX.WFON.0005.SM.3NMC9.1	Blood	Whole Blood	Training Set
GTEX.WHPG.0006.SM.3NMBV.1	Blood	Whole Blood	Training Set
GTEX.X585.0005.SM.46MV3.1	Blood	Whole Blood	Training Set
GTEX.WY7C.0004.SM.4ONDS.1	Blood	Cells - EBV-transformed lymphocytes	Training Set
GTEX.U3ZN.0006.SM.3DB7Y.1	Blood	Whole Blood	Training Set
GTEX.XK95.0005.SM.4AT4S.1	Blood	Whole Blood	Training Set
GTEX.132NY.0005.SM.5O9AC.1	Blood	Whole Blood	Training Set
GTEX.ZG7Y.0003.SM.4WWEJ.1	Blood	Cells - EBV-transformed lymphocytes	Training Set
GTEX.139UW.0005.SM.5NQ8U.1	Blood	Whole Blood	Training Set
GTEX.ZPCL.0004.SM.4WWD6.1	Blood	Cells - EBV-transformed lymphocytes	Training Set
GTEX.11UD2.0005.SM.5NQ9B.1	Blood	Whole Blood	Training Set
GTEX.ZF28.0005.SM.4WKH3.1	Blood	Whole Blood	Training Set
GTEX.Q2AH.0005.SM.5SI7G.1	Blood	Whole Blood	Training Set
GTEX.139T8.0006.SM.5NQ6V.1	Blood	Whole Blood	Training Set
GTEX.QCQG.0006.SM.2S1OW.1	Blood	Whole Blood	Training Set
GTEX.13PL7.0005.SM.5N9ET.1	Blood	Whole Blood	Training Set
GTEX.14BIN.0005.SM.5N9FE.1	Blood	Whole Blood	Training Set
GTEX.147F3.0005.SM.5N9FI.1	Blood	Whole Blood	Training Set
GTEX.YB5E.0001.SM.4VDSV.1	Blood	Cells - EBV-transformed lymphocytes	Training Set
GTEX.1211K.0006.SM.5MR53.1	Blood	Whole Blood	Training Set
GTEX.11DXY.0006.SM.5NQ8N.1	Blood	Whole Blood	Training Set
GTEX.XGQ4.0005.SM.4AT5U.1	Blood	Whole Blood	Training Set
GTEX.SJXC.0005.SM.2XCE7.1	Blood	Whole Blood	Training Set
GTEX.WCDI.0005.SM.3NB2M.1	Blood	Whole Blood	Training Set
GTEX.148VI.0006.SM.5O9A6.1	Blood	Whole Blood	Training Set
GTEX.UPK5.0003.SM.3NMDI.1	Blood	Cells - EBV-transformed lymphocytes	Training Set
GTEX.ZAB4.0005.SM.4RGM8.1	Blood	Whole Blood	Training Set
GTEX.131XF.0006.SM.5P9HK.1	Blood	Whole Blood	Training Set
GTEX.WFON.0005.SM.5S2RV.1	Blood	Whole Blood	Training Set
GTEX.Y5V5.0006.SM.4V6FE.1	Blood	Whole Blood	Training Set
GTEX.ZLV1.0001.SM.4WWAO.1	Blood	Cells - EBV-transformed lymphocytes	Training Set
GTEX.WVLH.0006.SM.3MJF7.1	Blood	Whole Blood	Training Set
GTEX.11PRG.0005.SM.5NQ6X.1	Blood	Whole Blood	Training Set
GTEX.ZDTT.0004.SM.4WKG3.1	Blood	Cells - EBV-transformed lymphocytes	Training Set
GTEX.12BJ1.0003.SM.5SI6V.1	Blood	Cells - EBV-transformed lymphocytes	Training Set
GTEX.POMQ.0006.SM.5SI7D.1	Blood	Whole Blood	Training Set
GTEX.X62O.0005.SM.46MV1.1	Blood	Whole Blood	Training Set
GTEX.WXYG.0004.SM.4MVOS.1	Blood	Cells - EBV-transformed lymphocytes	Training Set
GTEX.11LCK.0005.SM.5O98U.1	Blood	Whole Blood	Training Set
GTEX.Y8E5.0002.SM.57WD9.1	Blood	Cells - EBV-transformed lymphocytes	Training Set
GTEX.X638.0003.SM.47JZ1.1	Blood	Cells - EBV-transformed lymphocytes	Training Set
GTEX.YFCO.0005.SM.4W1ZI.1	Blood	Whole Blood	Training Set
GTEX.S341.0006.SM.3NM8D.1	Blood	Whole Blood	Training Set
GTEX.13W3W.0005.SM.5SI9Y.1	Blood	Whole Blood	Training Set
GTEX.WOFL.0006.SM.3TW8K.1	Blood	Whole Blood	Training Set
GTEX.T8EM.0006.SM.3DB71.1	Blood	Whole Blood	Training Set
GTEX.ZDYS.0002.SM.4WKGR.1	Blood	Whole Blood	Training Set
GTEX.POMQ.0006.SM.33HBY.1	Blood	Whole Blood	Training Set
GTEX.WFJO.0002.SM.3P61X.1	Blood	Cells - EBV-transformed lymphocytes	Training Set
GTEX.XQ8I.0006.SM.4BOQ5.1	Blood	Whole Blood	Training Set
GTEX.11I78.0005.SM.5N9GB.1	Blood	Whole Blood	Training Set
GTEX.YF7O.0004.SM.4W1ZT.1	Blood	Cells - EBV-transformed lymphocytes	Training Set
GTEX.14C38.0006.SM.5NQBF.1	Blood	Whole Blood	Training Set
GTEX.12WSC.0005.SM.5MR3H.1	Blood	Whole Blood	Training Set
GTEX.YF7O.0005.SM.4W1ZU.1	Blood	Whole Blood	Training Set
GTEX.14ICK.0006.SM.5NQB5.1	Blood	Whole Blood	Training Set
GTEX.11GS4.0006.SM.5SI9M.1	Blood	Whole Blood	Training Set
GTEX.ZT9X.0004.SM.4YCDT.1	Blood	Cells - EBV-transformed lymphocytes	Training Set
GTEX.S32W.0006.SM.5S2SW.1	Blood	Whole Blood	Training Set
GTEX.S32W.0004.SM.5S2SG.1	Blood	Cells - EBV-transformed lymphocytes	Training Set
GTEX.13FXS.0006.SM.5O99X.1	Blood	Whole Blood	Training Set
GTEX.ZTPG.0006.SM.4YCFG.1	Blood	Whole Blood	Training Set
GTEX.11ZTS.0005.SM.5NQ8A.1	Blood	Whole Blood	Training Set
GTEX.XMD1.0006.SM.4AT4Q.1	Blood	Whole Blood	Training Set
GTEX.WFJO.0005.SM.3GIKY.1	Blood	Whole Blood	Training Set
GTEX.YECK.0005.SM.4W217.1	Blood	Whole Blood	Training Set
GTEX.Y5V6.0005.SM.4V6FD.1	Blood	Whole Blood	Training Set
GTEX.14ICL.0006.SM.5SIAB.1	Blood	Whole Blood	Training Set
GTEX.SSA3.0005.SM.32QOT.1	Blood	Whole Blood	Training Set
GTEX.T5JW.0003.SM.3NMAD.1	Blood	Cells - EBV-transformed lymphocytes	Training Set
GTEX.WZTO.0001.SM.4PQZY.1	Blood	Cells - EBV-transformed lymphocytes	Training Set
GTEX.PWN1.0006.SM.2S1NG.1	Blood	Whole Blood	Training Set
GTEX.12126.0006.SM.5O9B8.1	Blood	Whole Blood	Training Set
GTEX.13U4I.0006.SM.5N9CI.1	Blood	Whole Blood	Training Set
GTEX.X638.0005.SM.47JX6.1	Blood	Whole Blood	Training Set
GTEX.12BJ1.0006.SM.5SIB5.1	Blood	Whole Blood	Training Set
GTEX.Y8LW.0005.SM.4V6EV.1	Blood	Whole Blood	Training Set
GTEX.XUZC.0005.SM.4BOQ8.1	Blood	Whole Blood	Training Set
GTEX.13FTW.0005.SM.5LZVZ.1	Blood	Whole Blood	Training Set
GTEX.Y8E4.0006.SM.4V6EW.1	Blood	Whole Blood	Training Set
GTEX.XUW1.0005.SM.4BOQ7.1	Blood	Whole Blood	Training Set
GTEX.WZTO.0006.SM.3NM9T.1	Blood	Whole Blood	Training Set
GTEX.RU1J.0006.SM.2TF6M.1	Blood	Whole Blood	Training Set
GTEX.ZG7Y.0006.SM.4WWEA.1	Blood	Whole Blood	Training Set
GTEX.11WQC.0006.SM.5LZVP.1	Blood	Whole Blood	Training Set
GTEX.POYW.0006.SM.2XCF4.1	Blood	Whole Blood	Training Set
GTEX.1314G.0005.SM.5NQ9O.1	Blood	Whole Blood	Training Set
GTEX.WXYG.0005.SM.3NB3M.1	Blood	Whole Blood	Training Set
GTEX.13OVI.0001.SM.5O9BL.1	Blood	Whole Blood	Training Set
GTEX.PWN1.0006.SM.5SI7T.1	Blood	Whole Blood	Training Set
GTEX.PX3G.0006.SM.33HBQ.1	Blood	Whole Blood	Training Set
GTEX.14C5O.0005.SM.5P9ER.1	Blood	Whole Blood	Training Set
GTEX.113JC.0006.SM.5O997.1	Blood	Whole Blood	Training Set
GTEX.UPJH.0001.SM.3NMDE.1	Blood	Cells - EBV-transformed lymphocytes	Training Set
GTEX.ZF3C.0001.SM.4WWAW.1	Blood	Cells - EBV-transformed lymphocytes	Training Set
GTEX.X15G.0005.SM.3NMDA.1	Blood	Whole Blood	Training Set
GTEX.13OVH.0005.SM.5P9HB.1	Blood	Whole Blood	Training Set
GTEX.11ILO.0006.SM.5LZWE.1	Blood	Whole Blood	Training Set
GTEX.QXCU.0006.SM.2TC5K.1	Blood	Whole Blood	Training Set
GTEX.R55E.0006.SM.2TC5G.1	Blood	Whole Blood	Training Set
GTEX.OOBJ.0006.SM.2I3F4.1	Blood	Whole Blood	Training Set
GTEX.11P81.0006.SM.5NQ7A.1	Blood	Whole Blood	Training Set
GTEX.ZDTS.0006.SM.4WAYZ.1	Blood	Whole Blood	Training Set
GTEX.ZEX8.0005.SM.4WKGE.1	Blood	Whole Blood	Training Set
GTEX.P78B.0005.SM.2I5GM.1	Blood	Whole Blood	Training Set
GTEX.OIZI.0005.SM.2XCED.1	Blood	Whole Blood	Training Set
GTEX.13S7M.0005.SM.5NQ76.1	Blood	Whole Blood	Training Set
GTEX.QDT8.0006.SM.5SI8N.1	Blood	Whole Blood	Training Set
GTEX.WFON.0001.SM.3P61W.3	Blood	Cells - EBV-transformed lymphocytes	Training Set
GTEX.Y5LM.0003.SM.4V6G1.1	Blood	Cells - EBV-transformed lymphocytes	Training Set
GTEX.OHPL.0006.SM.3MJHB.1	Blood	Whole Blood	Training Set
GTEX.T5JC.0005.SM.5S2SQ.1	Blood	Whole Blood	Training Set
GTEX.ZVTK.0003.SM.51MRV.1	Blood	Cells - EBV-transformed lymphocytes	Training Set
GTEX.14E6D.0005.SM.5N9D7.1	Blood	Whole Blood	Training Set
GTEX.12WSE.0005.SM.5NQAE.1	Blood	Whole Blood	Training Set
GTEX.11EMC.0006.SM.5O9DN.1	Blood	Whole Blood	Training Set
GTEX.11OC5.0006.SM.5N9FA.1	Blood	Whole Blood	Training Set
GTEX.S7SF.0006.SM.3K2B6.1	Blood	Whole Blood	Training Set
GTEX.Q2AH.0005.SM.2I3FI.1	Blood	Whole Blood	Training Set
GTEX.11NUK.0005.SM.5MR5F.1	Blood	Whole Blood	Training Set
GTEX.Q2AG.0005.SM.5SI7F.1	Blood	Whole Blood	Training Set
GTEX.YEC4.0001.SM.4W1Y6.1	Blood	Whole Blood	Training Set
GTEX.RVPV.0006.SM.2TF6Q.1	Blood	Whole Blood	Training Set
GTEX.TKQ1.0006.SM.33HBI.1	Blood	Whole Blood	Training Set
GTEX.RM2N.0006.SM.2TF5H.1	Blood	Whole Blood	Training Set
GTEX.WFG7.0001.SM.3P61S.1	Blood	Cells - EBV-transformed lymphocytes	Training Set
GTEX.T6MN.0002.SM.3NMAH.1	Blood	Cells - EBV-transformed lymphocytes	Training Set
GTEX.Y8DK.0005.SM.4RGNR.1	Blood	Whole Blood	Training Set
GTEX.14DAQ.0005.SM.5NQ7B.1	Blood	Whole Blood	Training Set
GTEX.XMD2.0006.SM.4WWEG.1	Blood	Whole Blood	Training Set
GTEX.QV44.0006.SM.2S1Q7.1	Blood	Whole Blood	Training Set
GTEX.VUSG.0003.SM.3NMDK.1	Blood	Cells - EBV-transformed lymphocytes	Training Set
GTEX.XAJ8.0006.SM.46MVM.1	Blood	Whole Blood	Training Set
GTEX.V1D1.0006.SM.3NMCE.1	Blood	Whole Blood	Training Set
GTEX.Y9LG.0001.SM.4VBRQ.1	Blood	Cells - EBV-transformed lymphocytes	Training Set
GTEX.Y5V6.0003.SM.4V6FX.1	Blood	Cells - EBV-transformed lymphocytes	Training Set
GTEX.W5X1.0006.SM.3GIJZ.1	Blood	Whole Blood	Training Set
GTEX.ZP4G.0006.SM.4WWE6.1	Blood	Whole Blood	Training Set
GTEX.SUCS.0002.SM.3NMAJ.1	Blood	Cells - EBV-transformed lymphocytes	Training Set
GTEX.WHWD.0003.SM.4M1ZS.1	Blood	Cells - EBV-transformed lymphocytes	Training Set
GTEX.QDT8.0006.SM.32PL3.1	Blood	Whole Blood	Training Set
GTEX.11TUW.0006.SM.5LZW2.1	Blood	Whole Blood	Training Set
GTEX.ZP4G.0003.SM.4WWED.1	Blood	Cells - EBV-transformed lymphocytes	Training Set
GTEX.RUSQ.0003.SM.2XCEB.1	Blood	Cells - EBV-transformed lymphocytes	Training Set
GTEX.XUYS.0002.SM.47JXL.1	Blood	Cells - EBV-transformed lymphocytes	Training Set
GTEX.11EM3.0001.SM.5Q5BD.1	Blood	Cells - EBV-transformed lymphocytes	Training Set
GTEX.WK11.0006.SM.3NB3J.1	Blood	Whole Blood	Training Set
GTEX.13OVG.0005.SM.5P9HA.1	Blood	Whole Blood	Training Set
GTEX.12WSJ.0005.SM.5LU8S.1	Blood	Whole Blood	Training Set
GTEX.11DYG.0006.SM.5NQB2.1	Blood	Whole Blood	Training Set
GTEX.YEC4.0002.SM.4W1Z6.1	Blood	Cells - EBV-transformed lymphocytes	Training Set
GTEX.11I78.0001.SM.5Q5BE.1	Blood	Cells - EBV-transformed lymphocytes	Training Set
GTEX.W5WG.0006.SM.3GIJT.1	Blood	Whole Blood	Training Set
GTEX.QDVN.0006.SM.48U1R.1	Blood	Whole Blood	Training Set
GTEX.R3RS.0005.SM.3GAEH.1	Blood	Whole Blood	Training Set
GTEX.U4B1.0006.SM.3DB8E.1	Blood	Whole Blood	Training Set
GTEX.12WSG.0005.SM.5NQA2.1	Blood	Whole Blood	Training Set
GTEX.XYKS.0005.SM.4BRUD.1	Blood	Whole Blood	Training Set
GTEX.QMRM.0005.SM.2S1QR.1	Blood	Whole Blood	Training Set
GTEX.ZVT2.0001.SM.57WCK.1	Blood	Cells - EBV-transformed lymphocytes	Training Set
GTEX.11P82.0006.SM.5N9FY.1	Blood	Whole Blood	Training Set
GTEX.13OW8.0005.SM.5NQAC.1	Blood	Whole Blood	Training Set
GTEX.OXRP.0006.SM.2I3FN.1	Blood	Whole Blood	Training Set
GTEX.P4QS.0005.SM.2I3EY.1	Blood	Whole Blood	Training Set
GTEX.14A5I.0005.SM.5N9FU.1	Blood	Whole Blood	Training Set
GTEX.14BIM.0006.SM.5O9AA.1	Blood	Whole Blood	Training Set
GTEX.UTHO.0006.SM.3NMCC.1	Blood	Whole Blood	Training Set
GTEX.111YS.0006.SM.5NQBE.1	Blood	Whole Blood	Training Set
GTEX.S32W.0004.SM.2XCE9.1	Blood	Cells - EBV-transformed lymphocytes	Training Set
GTEX.ZXES.0005.SM.57WCB.1	Blood	Whole Blood	Training Set
GTEX.11O72.0006.SM.5O9DB.1	Blood	Whole Blood	Training Set
GTEX.13CIG.0006.SM.5P9HF.1	Blood	Whole Blood	Training Set
GTEX.UPIC.0002.SM.3NMDC.1	Blood	Cells - EBV-transformed lymphocytes	Training Set
GTEX.PWCY.0005.SM.33HBP.1	Blood	Whole Blood	Training Set
GTEX.XPT6.0001.SM.4B64G.1	Blood	Cells - EBV-transformed lymphocytes	Training Set
GTEX.13OW6.0005.SM.5NQ9Z.1	Blood	Whole Blood	Training Set
GTEX.S7SF.0001.SM.3K2BE.1	Blood	Cells - EBV-transformed lymphocytes	Training Set
GTEX.14A6H.0006.SM.5NQ7W.1	Blood	Whole Blood	Training Set
GTEX.1497J.0005.SM.5NQBD.1	Blood	Whole Blood	Training Set
GTEX.WFON.0001.SM.3P61W.1	Blood	Cells - EBV-transformed lymphocytes	Training Set
GTEX.XPT6.0006.SM.4B66Q.1	Blood	Whole Blood	Training Set
GTEX.OXRL.0005.SM.3LK6A.1	Blood	Whole Blood	Training Set
GTEX.WFON.0001.SM.3P61W.2	Blood	Cells - EBV-transformed lymphocytes	Training Set
GTEX.T2YK.0005.SM.32QOV.1	Blood	Whole Blood	Training Set
GTEX.QDVJ.0005.SM.2TC5X.1	Blood	Whole Blood	Training Set
GTEX.S95S.0005.SM.2XCEC.1	Blood	Whole Blood	Training Set
GTEX.13CF2.0006.SM.5O99L.1	Blood	Whole Blood	Training Set
GTEX.T6MO.0003.SM.3NMAG.1	Blood	Cells - EBV-transformed lymphocytes	Training Set
GTEX.X4LF.0006.SM.3NMCO.1	Blood	Whole Blood	Training Set
GTEX.X4EO.0006.SM.3P5ZF.3	Blood	Whole Blood	Training Set
GTEX.XBEW.0006.SM.4AT4E.1	Blood	Whole Blood	Training Set
GTEX.QMR6.0005.SM.32PKY.1	Blood	Whole Blood	Training Set
GTEX.R55G.0006.SM.2TC6O.1	Blood	Whole Blood	Training Set
GTEX.12WSI.0005.SM.5O99K.1	Blood	Whole Blood	Training Set
GTEX.ZC5H.0004.SM.4WAXK.1	Blood	Cells - EBV-transformed lymphocytes	Training Set
GTEX.Y114.0002.SM.4TT78.1	Blood	Cells - EBV-transformed lymphocytes	Training Set
GTEX.1128S.0005.SM.5P9HI.1	Blood	Whole Blood	Training Set
GTEX.TML8.0005.SM.32QPA.1	Blood	Whole Blood	Training Set
GTEX.ZTPG.0002.SM.4YCEI.1	Blood	Cells - EBV-transformed lymphocytes	Training Set
GTEX.ZVE2.0006.SM.51MRW.1	Blood	Whole Blood	Training Set
GTEX.T6MN.0005.SM.5S2T2.1	Blood	Whole Blood	Training Set
GTEX.X4EP.0005.SM.3P5ZE.1	Blood	Whole Blood	Training Set
GTEX.132QS.0005.SM.5LZXK.1	Blood	Whole Blood	Training Set
GTEX.OXRO.0006.SM.2I5EM.1	Blood	Whole Blood	Training Set
GTEX.X4EP.0005.SM.3P5ZE.2	Blood	Whole Blood	Training Set
GTEX.QEG4.0006.SM.2I5FY.1	Blood	Whole Blood	Training Set
GTEX.Q2AH.0005.SM.33HBR.1	Blood	Whole Blood	Training Set
GTEX.12WSH.0005.SM.5NQ9P.1	Blood	Whole Blood	Training Set
GTEX.ZVZP.0006.SM.51MSW.1	Blood	Whole Blood	Training Set
GTEX.Y8LW.0002.SM.4V6G2.1	Blood	Cells - EBV-transformed lymphocytes	Training Set
GTEX.V955.0004.SM.3NMDH.1	Blood	Cells - EBV-transformed lymphocytes	Training Set
GTEX.1192X.0005.SM.5NQC3.1	Blood	Whole Blood	Training Set
GTEX.S4P3.0006.SM.3K2AW.1	Blood	Whole Blood	Training Set
GTEX.TMZS.0006.SM.3DB8G.1	Blood	Whole Blood	Training Set
GTEX.13OVJ.0006.SM.5O98T.1	Blood	Whole Blood	Training Set
GTEX.VUSG.0006.SM.3GIK9.1	Blood	Whole Blood	Training Set
GTEX.XOT4.0005.SM.4B64S.1	Blood	Whole Blood	Training Set
GTEX.XBEW.0002.SM.4AT5O.1	Blood	Cells - EBV-transformed lymphocytes	Training Set
GTEX.148VJ.0006.SM.5NQB1.1	Blood	Whole Blood	Training Set
GTEX.WYJK.0005.SM.3NMA1.1	Blood	Whole Blood	Training Set
GTEX.N7MT.0007.SM.3GACQ.1	Blood	Whole Blood	Training Set
GTEX.X585.0002.SM.46MVA.1	Blood	Cells - EBV-transformed lymphocytes	Training Set
GTEX.ZPIC.0002.SM.4WWEC.1	Blood	Cells - EBV-transformed lymphocytes	Training Set
GTEX.OHPK.0006.SM.2HMKH.1	Blood	Whole Blood	Training Set
GTEX.R55D.0006.SM.3GIJS.1	Blood	Whole Blood	Training Set
GTEX.YB5E.0005.SM.4VDSO.1	Blood	Whole Blood	Training Set
GTEX.14E6C.0005.SM.5O98N.1	Blood	Whole Blood	Training Set
GTEX.PLZ6.0006.SM.33HBZ.1	Blood	Whole Blood	Training Set
GTEX.XLM4.0004.SM.4AT5I.1	Blood	Cells - EBV-transformed lymphocytes	Training Set
GTEX.ZXG5.0005.SM.57WCN.1	Blood	Whole Blood	Training Set
GTEX.14E1K.0006.SM.5N9DY.1	Blood	Whole Blood	Training Set
GTEX.T6MN.0005.SM.32PLJ.1	Blood	Whole Blood	Training Set
GTEX.11EMC.0002.SM.5Q5DO.1	Blood	Cells - EBV-transformed lymphocytes	Training Set
GTEX.UPIC.0005.SM.3GACV.1	Blood	Whole Blood	Training Set
GTEX.S7PM.0006.SM.3NM8C.1	Blood	Whole Blood	Training Set
GTEX.13JUV.0006.SM.5NQ97.1	Blood	Whole Blood	Training Set
GTEX.XUJ4.0004.SM.4BOQE.1	Blood	Cells - EBV-transformed lymphocytes	Training Set
GTEX.ZV7C.0005.SM.57WDL.1	Blood	Whole Blood	Training Set
GTEX.WEY5.0001.SM.3P61Z.1	Blood	Cells - EBV-transformed lymphocytes	Training Set
GTEX.13111.0005.SM.5NQ7Z.1	Blood	Whole Blood	Training Set
GTEX.UJMC.0005.SM.3GACU.1	Blood	Whole Blood	Training Set
GTEX.ZQG8.0001.SM.4YCDH.1	Blood	Cells - EBV-transformed lymphocytes	Training Set
GTEX.WEY5.0001.SM.3P61Z.2	Blood	Cells - EBV-transformed lymphocytes	Training Set
GTEX.SUCS.0006.SM.4DM59.1	Blood	Whole Blood	Training Set
GTEX.11DXW.0006.SM.5NQ7Y.1	Blood	Whole Blood	Training Set
GTEX.11NV4.0005.SM.5N9EX.1	Blood	Whole Blood	Training Set
GTEX.XMD3.0006.SM.4AT5X.1	Blood	Whole Blood	Training Set
GTEX.U8XE.0005.SM.3DB8I.1	Blood	Whole Blood	Training Set
GTEX.S95S.0002.SM.3NM8K.1	Blood	Cells - EBV-transformed lymphocytes	Training Set
GTEX.O5YV.0006.SM.2I5GX.1	Blood	Whole Blood	Training Set
GTEX.UJHI.0006.SM.3DB8H.1	Blood	Whole Blood	Training Set
GTEX.Q2AG.0005.SM.33HBX.1	Blood	Whole Blood	Training Set
GTEX.ZE7O.0006.SM.51MTA.1	Blood	Whole Blood	Training Set
GTEX.WHSB.0005.SM.3LK7C.1	Blood	Whole Blood	Training Set
GTEX.139TU.0006.SM.5LZVN.1	Blood	Whole Blood	Training Set
GTEX.12WSK.0006.SM.5NQA1.1	Blood	Whole Blood	Training Set
GTEX.ZVP2.0005.SM.51MRK.1	Blood	Whole Blood	Training Set
GTEX.NL3G.0007.SM.4SOIF.1	Blood	Whole Blood	Training Set
GTEX.SN8G.0006.SM.32PLD.1	Blood	Whole Blood	Training Set
GTEX.XXEK.0004.SM.5S2TO.1	Blood	Cells - EBV-transformed lymphocytes	Training Set
GTEX.14BMV.0005.SM.5NQ6Y.1	Blood	Whole Blood	Training Set
GTEX.REY6.0005.SM.2TF54.1	Blood	Whole Blood	Training Set
GTEX.WFG7.0005.SM.3GIKM.1	Blood	Whole Blood	Training Set
GTEX.NL4W.0006.SM.2I3GH.1	Blood	Whole Blood	Training Set
GTEX.PWO3.0005.SM.2I5FS.1	Blood	Whole Blood	Training Set
GTEX.139UC.0005.SM.5PNU7.1	Blood	Whole Blood	Training Set
GTEX.13CZU.0005.SM.5LU8K.1	Blood	Whole Blood	Training Set
GTEX.TML8.0001.SM.3NMAF.1	Blood	Cells - EBV-transformed lymphocytes	Training Set
GTEX.YFC4.0006.SM.4RGLV.1	Blood	Whole Blood	Training Set
GTEX.131XW.0006.SM.5O9AO.1	Blood	Whole Blood	Training Set
GTEX.139TS.0005.SM.5NQC1.1	Blood	Whole Blood	Training Set
GTEX.WRHK.0001.SM.4WWDD.1	Blood	Cells - EBV-transformed lymphocytes	Training Set
GTEX.147F4.0006.SM.5O99T.1	Blood	Whole Blood	Training Set
GTEX.ZT9W.0003.SM.4YCE6.1	Blood	Cells - EBV-transformed lymphocytes	Training Set
GTEX.WRHK.0005.SM.3MJF5.1	Blood	Whole Blood	Training Set
GTEX.VUSH.0005.SM.3NB2H.1	Blood	Whole Blood	Training Set
GTEX.ZTSS.0005.SM.4YCDR.1	Blood	Whole Blood	Training Set
GTEX.PLZ6.0006.SM.2I5FQ.1	Blood	Whole Blood	Training Set
GTEX.U3ZN.0002.SM.3NMDF.1	Blood	Cells - EBV-transformed lymphocytes	Training Set
GTEX.13PLJ.0005.SM.5NQ99.1	Blood	Whole Blood	Training Set
GTEX.RWS6.0005.SM.2XCAN.1	Blood	Whole Blood	Training Set
GTEX.VUSH.0004.SM.3P61T.1	Blood	Cells - EBV-transformed lymphocytes	Training Set
GTEX.12WSM.0005.SM.5NQB3.1	Blood	Whole Blood	Training Set
GTEX.11GSP.0006.SM.5N9EL.1	Blood	Whole Blood	Training Set
GTEX.SSA3.0002.SM.3P61R.3	Blood	Cells - EBV-transformed lymphocytes	Training Set
GTEX.TMKS.0005.SM.33OV7.1	Blood	Whole Blood	Training Set
GTEX.U3ZM.0002.SM.3NMDM.1	Blood	Cells - EBV-transformed lymphocytes	Training Set
GTEX.XYKS.0002.SM.4BRWN.1	Blood	Cells - EBV-transformed lymphocytes	Training Set
GTEX.O5YT.0007.SM.32PK7.1	Blood	Whole Blood	Training Set
GTEX.R45C.0006.SM.3GAD6.1	Blood	Whole Blood	Training Set
GTEX.WHSB.0002.SM.4M1ZR.1	Blood	Cells - EBV-transformed lymphocytes	Training Set
GTEX.S32W.0006.SM.2XCAK.1	Blood	Whole Blood	Training Set
GTEX.X4EO.0006.SM.3P5ZF.1	Blood	Whole Blood	Training Set
GTEX.ZTTD.0001.SM.4YCD5.1	Blood	Cells - EBV-transformed lymphocytes	Training Set
GTEX.RU1J.0003.SM.3K2A8.1	Blood	Cells - EBV-transformed lymphocytes	Training Set
GTEX.11GSO.0005.SM.5O9CA.1	Blood	Whole Blood	Training Set
GTEX.V955.0005.SM.3P5ZC.3	Blood	Whole Blood	Training Set
GTEX.VUSG.0006.SM.5S2TA.1	Blood	Whole Blood	Training Set
GTEX.X4EO.0006.SM.3P5ZF.2	Blood	Whole Blood	Training Set
GTEX.W5WG.0002.SM.3NMDN.1	Blood	Cells - EBV-transformed lymphocytes	Training Set
GTEX.POMQ.0006.SM.2I5F4.1	Blood	Whole Blood	Training Set
GTEX.X4LF.0002.SM.4QASG.1	Blood	Cells - EBV-transformed lymphocytes	Training Set
GTEX.13CF3.0006.SM.5N9ED.1	Blood	Whole Blood	Training Set
GTEX.1122O.0003.SM.5Q5DL.1	Blood	Cells - EBV-transformed lymphocytes	Training Set
GTEX.11VI4.0001.SM.5S2OI.1	Blood	Cells - EBV-transformed lymphocytes	Training Set
GTEX.VJYA.0005.SM.3P5ZD.1	Blood	Whole Blood	Training Set
GTEX.S3XE.0006.SM.3K2AA.1	Blood	Whole Blood	Training Set
GTEX.UPK5.0006.SM.3GAD8.1	Blood	Whole Blood	Training Set
GTEX.Y3IK.0001.SM.4WWE1.1	Blood	Cells - EBV-transformed lymphocytes	Training Set
GTEX.ZEX8.0004.SM.4WKFQ.1	Blood	Cells - EBV-transformed lymphocytes	Training Set
GTEX.T5JC.0001.SM.5S2S4.1	Blood	Cells - EBV-transformed lymphocytes	Training Set
GTEX.TMMY.0005.SM.33HBN.1	Blood	Whole Blood	Training Set
GTEX.1399S.0006.SM.5NQ7U.1	Blood	Whole Blood	Training Set
GTEX.S4Q7.0003.SM.3NM8M.1	Blood	Cells - EBV-transformed lymphocytes	Training Set
GTEX.14BMU.0006.SM.5MR3T.1	Blood	Whole Blood	Training Set
GTEX.VJWN.0005.SM.3GIKF.1	Blood	Whole Blood	Training Set
GTEX.XMK1.0005.SM.4B665.1	Blood	Whole Blood	Training Set
GTEX.13FTZ.0005.SM.5NQ9N.1	Blood	Whole Blood	Training Set
GTEX.VJYA.0005.SM.3P5ZD.2	Blood	Whole Blood	Training Set
GTEX.XOTO.0006.SM.4B64T.1	Blood	Whole Blood	Training Set
GTEX.ZVTK.0006.SM.57WBK.1	Blood	Whole Blood	Training Set
GTEX.QVJO.0006.SM.2S1RC.1	Blood	Whole Blood	Training Set
GTEX.13VXT.0005.SM.5N9F3.1	Blood	Whole Blood	Training Set
GTEX.1GPI7.0005.SM.A9G13.1	Blood	Whole Blood	Training Set
GTEX.1H23P.0005.SM.A9G14.1	Blood	Whole Blood	Training Set
GTEX.1H1CY.0005.SM.A9G15.1	Blood	Whole Blood	Training Set
GTEX.1ICLY.0005.SM.A9G16.1	Blood	Whole Blood	Training Set
GTEX.1HT8W.0006.SM.A9G17.1	Blood	Whole Blood	Training Set
GTEX.1I19N.0006.SM.A9G18.1	Blood	Whole Blood	Training Set
GTEX.15SDE.0006.SM.7PC19.1	Blood	Whole Blood	Training Set
GTEX.1HCU7.0006.SM.A9G19.1	Blood	Whole Blood	Training Set
GTEX.1HCU9.0005.SM.A9G1A.1	Blood	Whole Blood	Training Set
GTEX.1IDJE.0006.SM.A9G1B.1	Blood	Whole Blood	Training Set
GTEX.1IDJC.0005.SM.A9G1C.1	Blood	Whole Blood	Training Set
GTEX.18A7B.0005.SM.7PC1D.1	Blood	Whole Blood	Training Set
GTEX.15RJE.0006.SM.7PC1J.1	Blood	Whole Blood	Training Set
GTEX.14PK6.0006.SM.7PC1L.1	Blood	Whole Blood	Training Set
GTEX.1B97I.0005.SM.7PC1M.1	Blood	Whole Blood	Training Set
GTEX.15RIG.0006.SM.7PC1N.1	Blood	Whole Blood	Training Set
GTEX.1A3MV.0005.SM.7PC1O.1	Blood	Whole Blood	Training Set
GTEX.18A7A.0006.SM.7PC1P.1	Blood	Whole Blood	Training Set
GTEX.1BAJH.0005.SM.7PC1R.1	Blood	Whole Blood	Training Set
GTEX.1RMOY.0005.SM.DO11X.1	Blood	Whole Blood	Training Set
GTEX.1A8G6.0006.SM.7PC1X.1	Blood	Whole Blood	Training Set
GTEX.1PBJI.0005.SM.CJI1Y.1	Blood	Whole Blood	Training Set
GTEX.1A32A.0006.SM.7PC1Y.1	Blood	Whole Blood	Training Set
GTEX.15G1A.0006.SM.7PC1Z.1	Blood	Whole Blood	Training Set
GTEX.1RQED.0005.SM.DO11Z.1	Blood	Whole Blood	Training Set
GTEX.1EKGG.0005.SM.AHZ1Z.1	Blood	Whole Blood	Training Set
GTEX.14PN4.0005.SM.7PC21.1	Blood	Whole Blood	Training Set
GTEX.1GMRU.0006.SM.AHZ21.1	Blood	Whole Blood	Training Set
GTEX.1RLM8.0005.SM.DO121.1	Blood	Whole Blood	Training Set
GTEX.1C64O.0006.SM.7PC22.1	Blood	Whole Blood	Training Set
GTEX.1CB4G.0006.SM.AHZ22.1	Blood	Whole Blood	Training Set
GTEX.1S82Y.0005.SM.DO123.1	Blood	Whole Blood	Training Set
GTEX.1E2YA.0006.SM.AHZ23.1	Blood	Whole Blood	Training Set
GTEX.1H4P4.0006.SM.AHZ24.1	Blood	Whole Blood	Training Set
GTEX.1HSMP.0006.SM.AHZ25.1	Blood	Whole Blood	Training Set
GTEX.1HR9M.0005.SM.AHZ26.1	Blood	Whole Blood	Training Set
GTEX.1I1GV.0005.SM.AHZ27.1	Blood	Whole Blood	Training Set
GTEX.1S3DN.0006.SM.DO127.1	Blood	Whole Blood	Training Set
GTEX.1HCU6.0005.SM.AHZ28.1	Blood	Whole Blood	Training Set
GTEX.14PQA.0006.SM.7PC2D.1	Blood	Whole Blood	Training Set
GTEX.16NPV.0005.SM.7PC2F.1	Blood	Whole Blood	Training Set
GTEX.1LC47.0005.SM.COH2J.1	Blood	Whole Blood	Training Set
GTEX.1F52S.0001.SM.EVR36.1	Blood	Cells - EBV-transformed lymphocytes	Training Set
GTEX.1R9PO.0006.SM.DO937.1	Blood	Whole Blood	Training Set
GTEX.1F5PK.0001.SM.EVR37.1	Blood	Cells - EBV-transformed lymphocytes	Training Set
GTEX.1R7EV.0005.SM.DO938.1	Blood	Whole Blood	Training Set
GTEX.1F6I4.0002.SM.EVR38.1	Blood	Cells - EBV-transformed lymphocytes	Training Set
GTEX.1F48J.0001.SM.EVR39.1	Blood	Cells - EBV-transformed lymphocytes	Training Set
GTEX.1R9K5.0006.SM.DO939.1	Blood	Whole Blood	Training Set
GTEX.1EU9M.0001.SM.EVR3A.1	Blood	Cells - EBV-transformed lymphocytes	Training Set
GTEX.1R9JW.0002.SM.DO93B.1	Blood	Whole Blood	Training Set
GTEX.1JN76.0005.SM.EAZ3B.1	Blood	Whole Blood	Training Set
GTEX.1EWIQ.0001.SM.EVR3B.1	Blood	Cells - EBV-transformed lymphocytes	Training Set
GTEX.1R7EU.0006.SM.DO93C.1	Blood	Whole Blood	Training Set
GTEX.1F75I.0001.SM.EVR3C.1	Blood	Cells - EBV-transformed lymphocytes	Training Set
GTEX.1GMR3.0004.SM.EVR3D.1	Blood	Cells - EBV-transformed lymphocytes	Training Set
GTEX.1RAZS.0005.SM.DO93D.1	Blood	Whole Blood	Training Set
GTEX.1GMR8.0001.SM.EVR3E.1	Blood	Cells - EBV-transformed lymphocytes	Training Set
GTEX.1RB15.0005.SM.CL53N.1	Blood	Whole Blood	Training Set
GTEX.1C2JI.0006.SM.7PC3Q.1	Blood	Whole Blood	Training Set
GTEX.1GF9X.0005.SM.A9G3R.1	Blood	Whole Blood	Training Set
GTEX.1RAZQ.0005.SM.DO93U.1	Blood	Whole Blood	Training Set
GTEX.1QW4Y.0005.SM.DO93W.1	Blood	Whole Blood	Training Set
GTEX.1R46S.0006.SM.DO93Y.1	Blood	Whole Blood	Training Set
GTEX.1RQEC.0006.SM.CL542.1	Blood	Whole Blood	Training Set
GTEX.1EN7A.0006.SM.AHZ4O.1	Blood	Whole Blood	Training Set
GTEX.1GN1U.0006.SM.ARU6G.1	Blood	Whole Blood	Training Set
GTEX.1E1VI.0005.SM.ARU6H.1	Blood	Whole Blood	Training Set
GTEX.1EU9M.0006.SM.ARU6I.1	Blood	Whole Blood	Training Set
GTEX.1EX96.0006.SM.ARU6J.1	Blood	Whole Blood	Training Set
GTEX.16BQI.0006.SM.7SB6K.1	Blood	Whole Blood	Training Set
GTEX.1F6IF.0005.SM.ARU6K.1	Blood	Whole Blood	Training Set
GTEX.1AYD5.0005.SM.7SB6L.1	Blood	Whole Blood	Training Set
GTEX.1GN2E.0005.SM.ARU6L.1	Blood	Whole Blood	Training Set
GTEX.18D9U.0006.SM.7SB6M.1	Blood	Whole Blood	Training Set
GTEX.1HB9E.0006.SM.ARU6M.1	Blood	Whole Blood	Training Set
GTEX.1HSMQ.0006.SM.ARU6N.1	Blood	Whole Blood	Training Set
GTEX.14PN3.0006.SM.7SB6O.1	Blood	Whole Blood	Training Set
GTEX.1I1GQ.0005.SM.ARU6O.1	Blood	Whole Blood	Training Set
GTEX.RN64.0006.SM.2TC6P.1	Blood	Whole Blood	Training Set
GTEX.14JG1.0006.SM.7SB6P.1	Blood	Whole Blood	Training Set
GTEX.1IDJF.0005.SM.ARU6P.1	Blood	Whole Blood	Training Set
GTEX.18465.0006.SM.7SB6R.1	Blood	Whole Blood	Training Set
GTEX.18A67.0006.SM.7SB6T.1	Blood	Whole Blood	Training Set
GTEX.18A66.0005.SM.7SB6U.1	Blood	Whole Blood	Training Set
GTEX.1AYCT.0005.SM.7SB6V.1	Blood	Whole Blood	Training Set
GTEX.1B8KE.0006.SM.7SB6W.1	Blood	Whole Blood	Training Set
GTEX.1F48J.0006.SM.ARL6W.1	Blood	Whole Blood	Training Set
GTEX.18QFQ.0006.SM.7SB6X.1	Blood	Whole Blood	Training Set
GTEX.1F52S.0006.SM.ARL6X.1	Blood	Whole Blood	Training Set
GTEX.1CAMS.0005.SM.ARL6Y.1	Blood	Whole Blood	Training Set
GTEX.1GZ4I.0006.SM.ARL6Z.1	Blood	Whole Blood	Training Set
GTEX.1GZ2Q.0005.SM.ARL71.1	Blood	Whole Blood	Training Set
GTEX.1I6K7.0005.SM.ARL72.1	Blood	Whole Blood	Training Set
GTEX.1HKZK.0005.SM.ARL73.1	Blood	Whole Blood	Training Set
GTEX.1HUB1.0005.SM.ARL74.1	Blood	Whole Blood	Training Set
GTEX.1I1GR.0006.SM.ARL75.1	Blood	Whole Blood	Training Set
GTEX.18D9A.0005.SM.7SB7H.1	Blood	Whole Blood	Training Set
GTEX.14PHY.0006.SM.7SB7I.1	Blood	Whole Blood	Training Set
GTEX.15DCE.0005.SM.7SB7J.1	Blood	Whole Blood	Training Set
GTEX.1R9PN.0006.SM.DTX7L.1	Blood	Whole Blood	Training Set
GTEX.1CB4F.0005.SM.A8N7L.1	Blood	Whole Blood	Training Set
GTEX.1F5PL.0006.SM.A8N7M.1	Blood	Whole Blood	Training Set
GTEX.1F88E.0005.SM.A8N7N.1	Blood	Whole Blood	Training Set
GTEX.1FIGZ.0005.SM.A8N7O.1	Blood	Whole Blood	Training Set
GTEX.1H1ZS.0006.SM.A8N7P.1	Blood	Whole Blood	Training Set
GTEX.1H3VY.0005.SM.A8N7Q.1	Blood	Whole Blood	Training Set
GTEX.1H2FU.0005.SM.A8N7R.1	Blood	Whole Blood	Training Set
GTEX.1HBPH.0006.SM.A8N7W.1	Blood	Whole Blood	Training Set
GTEX.1HBPN.0006.SM.A8N7X.1	Blood	Whole Blood	Training Set
GTEX.16XZY.0006.SM.7SB99.1	Blood	Whole Blood	Training Set
GTEX.SNOS.0003.SM.3NMAO.1	Blood	Cells - EBV-transformed lymphocytes	Training Set
GTEX.RN64.0005.SM.793B4.1	Blood	Whole Blood	Training Set
GTEX.QV31.0006.SM.793B5.1	Blood	Whole Blood	Training Set
GTEX.1RAZR.0006.SM.DLHBR.1	Blood	Whole Blood	Training Set
GTEX.1RDX4.0005.SM.DLHBS.1	Blood	Whole Blood	Training Set
GTEX.13111.0002.SM.5TDBU.1	Blood	Cells - EBV-transformed lymphocytes	Training Set
GTEX.12WSJ.0002.SM.5TDBV.1	Blood	Cells - EBV-transformed lymphocytes	Training Set
GTEX.1S83E.0006.SM.DLHBW.1	Blood	Whole Blood	Training Set
GTEX.1S831.0006.SM.DLHC1.1	Blood	Whole Blood	Training Set
GTEX.1S82Z.0006.SM.DLHC5.1	Blood	Whole Blood	Training Set
GTEX.1EMGI.0001.SM.EAZCK.1	Blood	Cells - EBV-transformed lymphocytes	Training Set
GTEX.1EKGG.0001.SM.EAZCL.1	Blood	Cells - EBV-transformed lymphocytes	Training Set
GTEX.1FIGZ.0001.SM.EAZCM.1	Blood	Cells - EBV-transformed lymphocytes	Training Set
GTEX.1GF9X.0001.SM.EAZCN.1	Blood	Cells - EBV-transformed lymphocytes	Training Set
GTEX.1GF9U.0001.SM.EAZCO.1	Blood	Cells - EBV-transformed lymphocytes	Training Set
GTEX.1339X.0005.SM.5O9CQ.1	Blood	Whole Blood	Training Set
GTEX.1399R.0002.SM.62LD9.1	Blood	Cells - EBV-transformed lymphocytes	Training Set
GTEX.132QS.0001.SM.62LDA.1	Blood	Cells - EBV-transformed lymphocytes	Training Set
GTEX.1J8JJ.0001.SM.EAZDE.1	Blood	Cells - EBV-transformed lymphocytes	Training Set
GTEX.1IKOH.0001.SM.EAZDF.1	Blood	Cells - EBV-transformed lymphocytes	Training Set
GTEX.PLZ5.0006.SM.DIPE2.1	Blood	Whole Blood	Training Set
GTEX.1KWVE.0005.SM.DIPE4.1	Blood	Whole Blood	Training Set
GTEX.QCQG.0006.SM.DIPE5.1	Blood	Whole Blood	Training Set
[truncated: 27,601 more rows]

## Sheet: Cancer Subtyping
Table S4 Cancer Subtyping
Sample ID	Cancer Type	Dataset Spliting
80275db0-a226-4b6b-a08f-4adbeee1db01	ACC_Primary_Tumor	Training Set
46c7dde5-a2b5-494f-96ae-0b6e2d51b003	ACC_Primary_Tumor	Training Set
725bbfb5-26f4-4512-9c75-47d013c1e605	ACC_Primary_Tumor	Training Set
ded8acf3-bbd8-46c9-85c9-a9c8f2e2bc0b	ACC_Primary_Tumor	Training Set
43e715bf-28d9-4b5e-b762-8cd1b69a430e	ACC_Primary_Tumor	Training Set
4f5498c4-a423-4b3d-ac98-d4e214a57d0e	ACC_Primary_Tumor	Training Set
1ad72157-a254-44b4-ba58-4f30f1ae910e	ACC_Primary_Tumor	Training Set
2d6c5aa7-3b33-48d7-ae0c-77a16b749d13	ACC_Primary_Tumor	Training Set
ae6f8b89-85c2-42b7-8d05-afddd4fefd16	ACC_Primary_Tumor	Training Set
f7cb1825-2303-4dd2-ae1f-7205738eaf1f	ACC_Primary_Tumor	Training Set
eb8d5168-216e-4abb-8b4e-9e67786cb322	ACC_Primary_Tumor	Training Set
1f553062-26fd-4a7f-b7fb-81184604f423	ACC_Primary_Tumor	Training Set
0ea7c916-fa47-489b-bc98-4d9e7d197628	ACC_Primary_Tumor	Training Set
539c8de3-6152-4671-b96f-ed6dc6dbd22b	ACC_Primary_Tumor	Training Set
dd4f845b-cad3-44cb-9d96-3c3f5ba1b72d	ACC_Primary_Tumor	Training Set
cb0f961c-527d-4a48-9408-286b26bd9532	ACC_Primary_Tumor	Training Set
53640d52-1167-4a5d-b656-97d32cba3934	ACC_Primary_Tumor	Training Set
e14825e0-0dc7-44c2-b265-f54672356838	ACC_Primary_Tumor	Training Set
84d25635-2a38-4cfb-bfac-38c007625c42	ACC_Primary_Tumor	Training Set
acd73ce8-afc5-47a0-9383-3cb97f018953	ACC_Primary_Tumor	Training Set
899cb9e0-48d0-413d-8566-bc151f146453	ACC_Primary_Tumor	Training Set
a771f6e3-d266-4fe7-98c6-c40e6a701d59	ACC_Primary_Tumor	Training Set
abf1ac12-872a-4c3d-a76c-07bc36a4da5e	ACC_Primary_Tumor	Training Set
282d390d-8e4e-4a19-b2b7-a6db4bb2d46c	ACC_Primary_Tumor	Training Set
1a5db9fc-2abd-4e1b-b5ef-b1cf5e5f3872	ACC_Primary_Tumor	Training Set
ee98e1b4-dfb3-4aec-8527-e1fd544c9475	ACC_Primary_Tumor	Training Set
30967f75-8499-47ff-ada4-4dc566013f7b	ACC_Primary_Tumor	Training Set
ef18318d-3d25-4d65-803a-ed6e62871e7e	ACC_Primary_Tumor	Training Set
ae4bfe63-f0c0-4624-ad97-4f7ff13e2384	ACC_Primary_Tumor	Training Set
cc8017c7-4128-48da-8e43-503f63158d85	ACC_Primary_Tumor	Training Set
93b382e4-9c9a-43f5-bd3b-502cc260b886	ACC_Primary_Tumor	Training Set
1f39dadd-3655-474e-ba4c-a5bd32c97a8b	ACC_Primary_Tumor	Training Set
2c80dd72-c9c7-4ac2-812f-9a31ef02779c	ACC_Primary_Tumor	Training Set
cf10d584-ce32-45a4-a932-e9d5af12a6a0	ACC_Primary_Tumor	Training Set
e72cebcb-d686-4b12-bcba-ec8f964330a2	ACC_Primary_Tumor	Training Set
1acb1be0-61f6-4243-bbec-e26a1cf90ca8	ACC_Primary_Tumor	Training Set
6f8c6f90-7e3c-4860-91dd-586708de44aa	ACC_Primary_Tumor	Training Set
193ccbe6-104f-49b4-bdb2-c82ee36fdaad	ACC_Primary_Tumor	Training Set
57e30d4e-abf7-47dd-92be-40ce215076b0	ACC_Primary_Tumor	Training Set
a26025ac-9f71-4c07-9135-83593193bbb2	ACC_Primary_Tumor	Training Set
77069279-5a6f-42c0-9aa5-8c939591dfb5	ACC_Primary_Tumor	Training Set
6fc5b56b-711b-4174-9b06-4e843124aab6	ACC_Primary_Tumor	Training Set
735d1de3-d781-4f89-a395-09974057bbb7	ACC_Primary_Tumor	Training Set
8ef0039b-d758-46ab-baf7-6a062c7c56ba	ACC_Primary_Tumor	Training Set
4ff6f2d8-f869-4735-a4d1-1a8423153fbc	ACC_Primary_Tumor	Training Set
83286e2d-e708-437a-911a-e6b050273cbd	ACC_Primary_Tumor	Training Set
fd445384-6ba9-4297-9d9c-12aba7d645c7	ACC_Primary_Tumor	Training Set
da8b577e-43e7-49bf-bf94-868e3194f5c9	ACC_Primary_Tumor	Training Set
8c8c09b9-ec83-45ec-bc4c-0ba92de60acb	ACC_Primary_Tumor	Training Set
75f7b5e2-6559-4b48-a2a4-287c35c559cc	ACC_Primary_Tumor	Training Set
f972a9aa-9842-4343-a533-a795e65581ce	ACC_Primary_Tumor	Training Set
cf96ddd4-dc0a-4341-bde6-4da2cb4978d0	ACC_Primary_Tumor	Training Set
bf6fa8cc-60c1-413a-b2c6-54ccacbc01d6	ACC_Primary_Tumor	Training Set
88c31a99-f96e-4fc8-8b3d-c1aaa05062d9	ACC_Primary_Tumor	Training Set
f904c5b6-70bd-4604-8254-79be23b152da	ACC_Primary_Tumor	Training Set
bc2c3248-7fc6-48bc-96c1-45ea573de7dc	ACC_Primary_Tumor	Training Set
e9a7485b-82b6-4bd2-afbb-dd0a82d6cde2	ACC_Primary_Tumor	Training Set
485a8107-df9a-4bc6-8a72-07fba93f10f2	ACC_Primary_Tumor	Training Set
a08b85ea-d1e7-4b77-8dec-36294305b9f7	ACC_Primary_Tumor	Training Set
aa2d53e5-d389-4332-9dd5-a736052e48f8	ACC_Primary_Tumor	Training Set
94fc8991-182b-4b00-9a06-a00e8d3bdcfa	ACC_Primary_Tumor	Training Set
78700fba-1487-4754-9b30-18837bf7e9fb	ACC_Primary_Tumor	Training Set
85a86b91-4f24-4e77-ae2d-520f8e205efc	ACC_Primary_Tumor	Training Set
1cb463c0-c33a-4fc6-9f8d-d8a48cf2c600	BLCA_Primary_Tumor	Training Set
7d2f5ce1-2698-46eb-af50-8e27ad8c8201	BLCA_Primary_Tumor	Training Set
b0245553-f100-4235-bfc2-ab908c42e401	BLCA_Primary_Tumor	Training Set
9bdfb73a-076e-418b-b84e-381341688002	BLCA_Primary_Tumor	Training Set
5f057a65-5c32-4a97-ac8f-051e9fa50302	BLCA_Primary_Tumor	Training Set
151b0b5a-8270-4869-8547-de9c33c7aa03	BLCA_Primary_Tumor	Training Set
211aa554-5cf0-4b0b-a428-25b0ab791303	BLCA_Primary_Tumor	Training Set
0842e242-d75e-427c-a2c1-6b3310a83a04	BLCA_Primary_Tumor	Training Set
1f120308-a696-4411-9470-f6546ea5de04	BLCA_Primary_Tumor	Training Set
f7069be4-f0f1-4063-8f78-69cf3a73fc04	BLCA_Primary_Tumor	Training Set
d4b6fa57-a62d-4451-aac8-328a43dcaf05	BLCA_Primary_Tumor	Training Set
de0477f7-ed87-484c-b59b-9f3773f71b05	BLCA_Primary_Tumor	Training Set
1d39b873-4e7c-491f-a42c-40053aa7ef06	BLCA_Primary_Tumor	Training Set
76724bd8-b037-4bb7-90bc-bc40f02c1507	BLCA_Primary_Tumor	Training Set
cc348bd8-b782-41d1-a04b-9a06dd9da208	BLCA_Primary_Tumor	Training Set
4bca5e18-8f14-4fce-8199-23f44d5a3509	BLCA_Primary_Tumor	Training Set
01b0afa5-4ea9-4c2b-a375-7e1e4d9b3c09	BLCA_Primary_Tumor	Training Set
fef62ff9-f25e-49a7-b1e4-84099d13a309	BLCA_Primary_Tumor	Training Set
157390d2-ee7a-4eed-a445-2764163ef70a	BLCA_Primary_Tumor	Training Set
d29f0d63-c538-4fac-be6e-176227d9a10b	BLCA_Primary_Tumor	Training Set
7fab3a0e-7932-4b51-a6a6-22f2aa46290c	BLCA_Primary_Tumor	Training Set
2c03f87d-6aa1-41c2-8a78-454b8455320c	BLCA_Primary_Tumor	Training Set
65d6ea6c-7827-40aa-82ad-c83ec5d0fc0c	BLCA_Primary_Tumor	Training Set
b013515b-3825-40e0-9854-04ec0afe600d	BLCA_Primary_Tumor	Training Set
086d8f38-76b9-450d-a070-9da9d9779d0e	BLCA_Primary_Tumor	Training Set
8e692295-a61a-49e0-88b1-3498ba20b10e	BLCA_Primary_Tumor	Training Set
f6788a89-a4c8-4863-859e-a94e3d64c10e	BLCA_Primary_Tumor	Training Set
4f272bad-b5cf-4455-8333-40a4baf2a20f	BLCA_Primary_Tumor	Training Set
9b1d6277-4356-42ab-ad8d-24b260d17c10	BLCA_Primary_Tumor	Training Set
b5359aa3-db8c-46e9-9240-8becfc76ff11	BLCA_Primary_Tumor	Training Set
ef73b80f-03ee-40c8-a1a4-cfb4d5062611	BLCA_Primary_Tumor	Training Set
99d8a9e2-773c-4142-9a93-5f749961f712	BLCA_Primary_Tumor	Training Set
cad78558-0f2a-44bc-b176-a77bd8d9fd12	BLCA_Primary_Tumor	Training Set
ee759127-daa0-4281-ac47-880bc8563114	BLCA_Primary_Tumor	Training Set
f7fc684a-10b6-4546-8ff5-76bc2a64c514	BLCA_Primary_Tumor	Training Set
fcce37c4-a2be-4050-8ee2-dc341093c014	BLCA_Primary_Tumor	Training Set
23c3adb8-41a1-4cb1-96c3-d9185324b114	BLCA_Primary_Tumor	Training Set
a6c06064-8194-4dfb-9262-a30e63db2514	BLCA_Primary_Tumor	Training Set
fc7423dc-b16b-49bf-a68c-110e43b6fe16	BLCA_Primary_Tumor	Training Set
f3230d6d-ceb1-4a20-bfb5-e0d31e0ab417	BLCA_Primary_Tumor	Training Set
a1d5f8b2-0876-4f8c-8a22-d8fd14fdd91a	BLCA_Primary_Tumor	Training Set
2d908b91-5dfd-4edf-a141-0c483266f71a	BLCA_Primary_Tumor	Training Set
57373041-9d22-4db1-aa56-97733339391b	BLCA_Primary_Tumor	Training Set
319edcee-dc90-4fe0-a03e-ee14026ca91b	BLCA_Primary_Tumor	Training Set
0a3ab174-07d0-4396-a6c5-9eceebe8651c	BLCA_Primary_Tumor	Training Set
eeee43e2-5203-46d7-b554-f4cbc2e1881c	BLCA_Primary_Tumor	Training Set
78ca76f2-6668-444a-826f-da9316dad81d	BLCA_Primary_Tumor	Training Set
ceb1e524-ea75-4111-aa7c-1d8b9ffc021d	BLCA_Primary_Tumor	Training Set
5d52cc4f-7bca-491e-ae85-0719b30d121e	BLCA_Primary_Tumor	Training Set
5c92c97a-9690-4452-90df-1f4194e2cb1f	BLCA_Primary_Tumor	Training Set
d5cbd424-4ea8-4a2e-889e-64eb7d20cd1f	BLCA_Primary_Tumor	Training Set
1a6d233f-caac-4d74-8d79-298fc30d8c20	BLCA_Primary_Tumor	Training Set
7fed9d6a-769e-47ae-b8ea-c87e59547122	BLCA_Primary_Tumor	Training Set
14bec97b-8960-4b1d-a9de-0530ce49bb23	BLCA_Primary_Tumor	Training Set
9747fd2f-d078-45ca-9d16-58d52a287323	BLCA_Primary_Tumor	Training Set
80f493dc-d202-4fb0-803b-3a4fa2c85824	BLCA_Primary_Tumor	Training Set
d0c80fd7-18e3-45f3-90e8-3387ba92be25	BLCA_Primary_Tumor	Training Set
ee0b2584-29ff-4d98-a95d-420f8e7ba625	BLCA_Primary_Tumor	Training Set
a8ae6f61-125b-4103-9f45-3f4c86234826	BLCA_Primary_Tumor	Training Set
b03e342c-7da6-4d7d-95f6-c6506b374627	BLCA_Primary_Tumor	Training Set
85363c3b-1793-4b41-8015-c5450c1d5428	BLCA_Primary_Tumor	Training Set
242f1dfd-c95f-4a3b-ae88-6f7f06cc4d29	BLCA_Primary_Tumor	Training Set
197e34ca-ef43-495c-8aa4-858982333429	BLCA_Primary_Tumor	Training Set
86acc3dd-a9e8-4fda-acf9-33175ce06629	BLCA_Primary_Tumor	Training Set
13034342-456c-4a89-a936-a6f2dcc76f2b	BLCA_Primary_Tumor	Training Set
e773014c-98de-4394-95f9-845e29f35a2b	BLCA_Primary_Tumor	Training Set
a72cafbf-c3e4-4518-ae38-16a3b3914d2b	BLCA_Primary_Tumor	Training Set
fed748b7-70a5-41cc-94be-8799d115932c	BLCA_Primary_Tumor	Training Set
2050948c-479b-44b8-bf3a-2606a8bc822d	BLCA_Primary_Tumor	Training Set
0c442324-7e9c-45e8-afbc-968e27c5412e	BLCA_Primary_Tumor	Training Set
92a7e918-fd15-40ff-8dfa-4a7c9a916230	BLCA_Primary_Tumor	Training Set
5a00cae2-8b36-4ba2-ae5a-9c53364f1830	BLCA_Primary_Tumor	Training Set
c958fced-bb40-4823-b839-6a31c6988a32	BLCA_Primary_Tumor	Training Set
c8041089-e148-4b33-bbb7-9298b81a8832	BLCA_Primary_Tumor	Training Set
ebe6a1a2-8084-4b84-be78-43e3cd5eea32	BLCA_Primary_Tumor	Training Set
1b23cf8b-c6f4-49f3-8f5f-4466ef83d032	BLCA_Primary_Tumor	Training Set
ed8a6ee1-399e-444c-bea5-1b32aaf46334	BLCA_Primary_Tumor	Training Set
2d07a1bf-0304-4276-98cb-91eb72552b34	BLCA_Primary_Tumor	Training Set
2b22c1f1-bb5c-4dac-a533-53deac596b35	BLCA_Primary_Tumor	Training Set
b93811d6-f95f-4fc3-96dc-d4eda78b1d35	BLCA_Primary_Tumor	Training Set
94491627-b82b-4986-9137-ff5b2d2e1336	BLCA_Primary_Tumor	Training Set
8dbe419e-a360-4493-ac3b-c145887d9237	BLCA_Primary_Tumor	Training Set
a3e44fb4-8385-4e39-88eb-f8e0d74e8938	BLCA_Primary_Tumor	Training Set
9abad2ad-cb06-4432-bfdf-2eeab5a82338	BLCA_Primary_Tumor	Training Set
420503aa-3799-4816-beec-0b4d05988d38	BLCA_Primary_Tumor	Training Set
ea6686df-0a28-4271-90ba-76a5f9e62b39	BLCA_Primary_Tumor	Training Set
1b239b10-362e-4fba-9b28-3d81f0cca53b	BLCA_Primary_Tumor	Training Set
10e7ffa0-f8be-43ab-b81c-d4c9e8d5423b	BLCA_Primary_Tumor	Training Set
164dd212-0839-4644-8fee-e6a07a60803b	BLCA_Primary_Tumor	Training Set
fcee7969-abfa-4898-acfb-194e82661a3c	BLCA_Primary_Tumor	Training Set
40bfc6a0-e6da-4029-aaaf-3892db08403c	BLCA_Primary_Tumor	Training Set
9b16bcc6-8301-41fd-b763-1672f132e03d	BLCA_Primary_Tumor	Training Set
e55ab18d-4929-4551-8561-f04399c6e13d	BLCA_Primary_Tumor	Training Set
839a5a2d-0447-4d06-b910-8500bf600e3e	BLCA_Primary_Tumor	Training Set
a3150223-5399-4cc6-90a7-6046f39fac3e	BLCA_Primary_Tumor	Training Set
b4013849-b1b4-45ad-8ce9-72d3c2683f3f	BLCA_Primary_Tumor	Training Set
cd8175a9-2ac3-440b-b1f4-f6e96de38e40	BLCA_Primary_Tumor	Training Set
a67b8b9e-1e8a-4848-9d09-0e266a44cf40	BLCA_Primary_Tumor	Training Set
2acf1c92-c65e-4928-84d6-67f6eb755341	BLCA_Primary_Tumor	Training Set
a6ee9c67-2ca8-4e7c-a537-f10e251d5d41	BLCA_Primary_Tumor	Training Set
b77649b0-638c-4445-8faf-3e1556dbac42	BLCA_Primary_Tumor	Training Set
bf57d382-9256-40d4-8dde-6c0dd2a91544	BLCA_Primary_Tumor	Training Set
3ae0aa50-05b1-4b5f-a737-be816d475a45	BLCA_Primary_Tumor	Training Set
e7064800-48fd-492a-a074-84a0b2452445	BLCA_Primary_Tumor	Training Set
1242a492-03f1-42c0-a0d7-a1adfd034e47	BLCA_Primary_Tumor	Training Set
faa38111-f046-4acd-b787-764a17eaf548	BLCA_Primary_Tumor	Training Set
6c0b851d-80a8-4e10-8328-9ba08d938849	BLCA_Primary_Tumor	Training Set
458fce33-422d-4c4c-a9cf-abfed8b19d4a	BLCA_Primary_Tumor	Training Set
10105bb3-3534-4b7f-8cdb-9702945c414a	BLCA_Primary_Tumor	Training Set
11faac26-d8da-41b3-92a2-04e99c023e4c	BLCA_Primary_Tumor	Training Set
94128d59-a5bb-4460-a671-5e1571726c4d	BLCA_Primary_Tumor	Training Set
50b17207-5e41-4cd3-bdbf-1f8efbd8ee4e	BLCA_Primary_Tumor	Training Set
eaec5fcc-3871-4a2e-a7e4-6c2d9a205a50	BLCA_Primary_Tumor	Training Set
c315c9e4-6a99-4169-afc7-8cf13b656f51	BLCA_Primary_Tumor	Training Set
48f7a65b-b1e0-4026-ae76-83cda8b26d51	BLCA_Primary_Tumor	Training Set
54539b90-4eec-4579-89f4-5efc4fb4cc51	BLCA_Primary_Tumor	Training Set
bc2ff24c-25b4-48e9-b5ab-dd7d1c696253	BLCA_Primary_Tumor	Training Set
cecb1e03-6390-4532-8573-bb6453a99d55	BLCA_Primary_Tumor	Training Set
8fd217a9-1527-4620-ba0a-5f9ad3586555	BLCA_Primary_Tumor	Training Set
2093b791-606a-4f18-8e0b-f8607dcb8256	BLCA_Primary_Tumor	Training Set
a3e4d473-949d-4ada-87af-60ed83b9e056	BLCA_Primary_Tumor	Training Set
447e601e-c0bf-4b00-baf5-9ed4feb56057	BLCA_Primary_Tumor	Training Set
f3f3d24b-a556-4a8f-a457-9632932e4c58	BLCA_Primary_Tumor	Training Set
ac2045ee-d600-42e7-be82-9efb92286d59	BLCA_Primary_Tumor	Training Set
eedfa1f7-26d8-426a-93f5-43ccf0b3cf59	BLCA_Primary_Tumor	Training Set
e64a5d3b-33de-45b9-bda2-4db79eff905c	BLCA_Primary_Tumor	Training Set
5dcbc0b2-62d4-409c-b7fd-833b2814395c	BLCA_Primary_Tumor	Training Set
9e8b5156-8285-4dfd-80bb-3087c7fa125c	BLCA_Primary_Tumor	Training Set
e3f52c71-f558-47c7-b956-bc79f98efd5d	BLCA_Primary_Tumor	Training Set
f8c42878-78d3-49f7-9900-7ac7e0f4d05d	BLCA_Primary_Tumor	Training Set
8cdfae40-f216-4ea2-81fb-3dbccf88285e	BLCA_Primary_Tumor	Training Set
64b46e48-cc72-47ff-bc68-8b29736c7d5f	BLCA_Primary_Tumor	Training Set
5c7bc0d9-0b73-4377-bfe2-61a9b5fd5d5f	BLCA_Primary_Tumor	Training Set
3d4f4de9-29fe-4132-955e-adacdd7e7060	BLCA_Primary_Tumor	Training Set
ca728ff8-d96f-4230-8518-f94b4c4fd460	BLCA_Primary_Tumor	Training Set
2f3fd524-6f59-46c0-99fa-6caa0c423061	BLCA_Primary_Tumor	Training Set
953a9f0a-ec20-4ec3-88b6-348d528fa561	BLCA_Primary_Tumor	Training Set
e1f863f8-90f0-402c-8433-95f522ddce63	BLCA_Primary_Tumor	Training Set
3e9eee6e-f01d-453c-9f57-99edffa84c63	BLCA_Primary_Tumor	Training Set
7baa722a-1307-4b47-bb75-60679c104666	BLCA_Primary_Tumor	Training Set
919ffb8d-d3b1-470c-8e2f-045104aced68	BLCA_Primary_Tumor	Training Set
56943bd9-eeda-457a-9f18-acc397978668	BLCA_Primary_Tumor	Training Set
73d9833a-5e24-47d9-b193-22a66a282669	BLCA_Primary_Tumor	Training Set
4705f8f9-d6e3-4291-872f-8985cb9f5f69	BLCA_Primary_Tumor	Training Set
5b787ac9-60bd-4c0a-83e8-a8fe10381069	BLCA_Primary_Tumor	Training Set
7644ce79-63da-41fd-8c82-6125f24c0a6b	BLCA_Primary_Tumor	Training Set
14003aa2-81b6-4143-98ad-124903bae56b	BLCA_Primary_Tumor	Training Set
12be2e3a-1b57-4eee-b130-e70b6be5a96b	BLCA_Primary_Tumor	Training Set
7465251e-7bc8-4179-8950-4e41836cf36b	BLCA_Primary_Tumor	Training Set
f0e550ca-cb04-4202-9aea-eae1c295eb6e	BLCA_Primary_Tumor	Training Set
090b1958-a944-4b50-8fa4-8f6313e2126f	BLCA_Primary_Tumor	Training Set
6f2172f6-926d-4ede-b078-11505a53fb6f	BLCA_Primary_Tumor	Training Set
a8574381-5644-4f7a-bdd7-c579a6398b70	BLCA_Primary_Tumor	Training Set
c3c5472c-21a7-4f22-aee7-514902873770	BLCA_Primary_Tumor	Training Set
b232056e-59b2-4d05-983d-8740d6994a71	BLCA_Primary_Tumor	Training Set
5f7397b4-9770-406e-83d9-b70f3ec22471	BLCA_Primary_Tumor	Training Set
70b667b1-29b5-4287-9110-46e3e9855271	BLCA_Primary_Tumor	Training Set
d83ca5fb-d13c-49d2-b21b-928fa777f871	BLCA_Primary_Tumor	Training Set
7a8f589a-ba6b-4249-8203-f1645db0e772	BLCA_Primary_Tumor	Training Set
10974801-c0a4-4d01-8e2f-f82490b6aa72	BLCA_Primary_Tumor	Training Set
57c51f55-9f3a-44f0-99db-ee3557c04373	BLCA_Primary_Tumor	Training Set
eedcfe8a-83e5-46aa-b68b-3fb583ad7773	BLCA_Primary_Tumor	Training Set
3bb9fc05-3230-4c65-9259-ed8fe65ad473	BLCA_Primary_Tumor	Training Set
7b83b2c9-afe1-4958-b90e-c37f1b354174	BLCA_Primary_Tumor	Training Set
4aad7b53-9aa9-404b-8888-13160458e476	BLCA_Primary_Tumor	Training Set
6b75e046-9f34-49d2-976e-b58cc2e09577	BLCA_Primary_Tumor	Training Set
396d23d5-7d2e-484c-a0e9-1b97d1d27e77	BLCA_Primary_Tumor	Training Set
b822a426-98c1-4976-9fc2-16347992ad78	BLCA_Primary_Tumor	Training Set
2af66787-e6a9-4db0-91b8-d438a0778178	BLCA_Primary_Tumor	Training Set
96fd3c26-7073-434e-b18b-42cb70d3f579	BLCA_Primary_Tumor	Training Set
cf1dad66-e423-4354-af7c-58fc2394967a	BLCA_Primary_Tumor	Training Set
79bdca7c-dab8-455e-812a-a08265753d7a	BLCA_Primary_Tumor	Training Set
0c559892-1a50-4b5a-97f7-e42296ee327b	BLCA_Primary_Tumor	Training Set
66600553-0e68-405c-81a3-4064da18737d	BLCA_Primary_Tumor	Training Set
b76ba504-e72d-4243-8401-d9f12757b57d	BLCA_Primary_Tumor	Training Set
eed135af-363b-4669-9270-3ada652f5f7e	BLCA_Primary_Tumor	Training Set
7248e306-3877-46f8-91f6-706ad5d8207e	BLCA_Primary_Tumor	Training Set
49ae6d18-2e4e-444c-91ef-6ebf5049b07e	BLCA_Primary_Tumor	Training Set
d24d3ff9-d2bf-49bd-ba20-9466d346497e	BLCA_Primary_Tumor	Training Set
815f1327-2fdc-4fb2-94eb-ccd41adfe47f	BLCA_Primary_Tumor	Training Set
b743d4f2-da2c-4f41-8d7e-c9ee70c2f37f	BLCA_Primary_Tumor	Training Set
5ae9c833-487f-44b8-acf0-4cb87dd72b7f	BLCA_Primary_Tumor	Training Set
5692258b-d994-4adb-b95e-5cb8179ce781	BLCA_Primary_Tumor	Training Set
d2bbc61b-dca0-45aa-bfc7-e1023b433f81	BLCA_Primary_Tumor	Training Set
3d6b2adc-f22f-471e-960e-4f13f3a3d081	BLCA_Primary_Tumor	Training Set
16463364-f250-4d42-b5c6-309333e40b83	BLCA_Primary_Tumor	Training Set
2b1931f7-7ac3-4e4f-b05d-32b7645d7084	BLCA_Primary_Tumor	Training Set
95df2bc4-0f67-432a-a26a-98fb26f65c84	BLCA_Primary_Tumor	Training Set
a66fcda9-6775-4052-94c4-12e173df4084	BLCA_Primary_Tumor	Training Set
82341457-7386-4c56-9daf-a8f020055685	BLCA_Primary_Tumor	Training Set
f29f82bf-062c-4273-82e9-05d68e51df86	BLCA_Primary_Tumor	Training Set
4571a92e-a240-4a6d-bc50-8971bd299287	BLCA_Primary_Tumor	Training Set
3b41a4ab-99f1-49dd-bdc1-f5d7b73ab388	BLCA_Primary_Tumor	Training Set
c3de4a5a-1832-49c8-8548-02baf5e2f58c	BLCA_Primary_Tumor	Training Set
75682769-79e2-4c6d-967f-7b9afc8bdf8c	BLCA_Primary_Tumor	Training Set
e63edcdb-754a-4552-a3d7-0fd72b3d798d	BLCA_Primary_Tumor	Training Set
3eeb805b-3dc3-47ad-9d83-672d39333b8f	BLCA_Primary_Tumor	Training Set
002a3e61-7200-4b45-9704-6a9360233390	BLCA_Primary_Tumor	Training Set
1793090f-5371-4b55-9963-4edeeea45491	BLCA_Primary_Tumor	Training Set
1b2e1531-7c1f-4baf-bc45-42425b7b8891	BLCA_Primary_Tumor	Training Set
5dc3a5b2-d584-495f-bcc5-7a9ff36b7b92	BLCA_Primary_Tumor	Training Set
99595982-fb4f-46f8-94eb-282cbce7b892	BLCA_Primary_Tumor	Training Set
529769db-59a0-4e69-8860-13c7caa1db92	BLCA_Primary_Tumor	Training Set
78a063fb-1c15-40f5-af8d-b0d86142f794	BLCA_Primary_Tumor	Training Set
b5567e00-32aa-48d8-8087-1088c22b0994	BLCA_Primary_Tumor	Training Set
a3dbf047-c112-47d2-b192-87b2fd3c8694	BLCA_Primary_Tumor	Training Set
dc33c2b1-27d4-4997-aafd-633162f52895	BLCA_Primary_Tumor	Training Set
c65b6272-dd2b-4075-963b-746f8904b395	BLCA_Primary_Tumor	Training Set
b52c2dce-0567-47f0-8fca-ca0f22d75c99	BLCA_Primary_Tumor	Training Set
136b7576-1108-4fa3-8254-6069f0ca879a	BLCA_Primary_Tumor	Training Set
95500246-10f5-4818-bbd7-e5fa7b03889a	BLCA_Primary_Tumor	Training Set
c14a2bc9-0d51-4699-9280-fb66eb72f19b	BLCA_Primary_Tumor	Training Set
1b6ff488-dfee-45d4-a03c-52c01579139b	BLCA_Primary_Tumor	Training Set
f12bd7c5-699c-4f80-b02c-cfa9d8bbd99c	BLCA_Primary_Tumor	Training Set
6b472ceb-9189-4605-b1b6-27f477720a9d	BLCA_Primary_Tumor	Training Set
93cef7c9-5f0b-4422-a59a-54dfada6ea9e	BLCA_Primary_Tumor	Training Set
f4424d1c-5c92-4820-9f6c-ba81958bb39f	BLCA_Primary_Tumor	Training Set
4c12fd64-4333-4686-9e10-afb2589d3a9f	BLCA_Primary_Tumor	Training Set
31821d8d-76b3-4a0a-9630-7996a5b74d9f	BLCA_Primary_Tumor	Training Set
ec4209c8-c1ad-47ff-a6d8-771d18270ea1	BLCA_Primary_Tumor	Training Set
1ff8e3dd-9e9d-4e23-882e-ea767e9f93a2	BLCA_Primary_Tumor	Training Set
61da3713-3dda-4bb8-8814-1e4aca3edfa2	BLCA_Primary_Tumor	Training Set
ed242fae-14d1-4804-9c96-281197d485a4	BLCA_Primary_Tumor	Training Set
b42c48a2-5f6c-4b28-ba09-b497470980a4	BLCA_Primary_Tumor	Training Set
6b3e9359-93bf-45f3-8039-cf28412822a4	BLCA_Primary_Tumor	Training Set
8f9d4fa9-b2c4-44af-af21-f6123978bfa5	BLCA_Primary_Tumor	Training Set
6516f0bc-00e2-40e6-9b9d-420f0da30fa5	BLCA_Primary_Tumor	Training Set
eb235e9a-e453-4108-ad4f-31260f4340a6	BLCA_Primary_Tumor	Training Set
71ffdbde-13aa-4466-8880-82cf6f3c6ca6	BLCA_Primary_Tumor	Training Set
9abf662a-570a-4825-83fb-6dc66933d1a7	BLCA_Primary_Tumor	Training Set
c7a7975b-a60e-4562-8b3a-bee3a6f9b6a8	BLCA_Primary_Tumor	Training Set
187000ef-d29e-4977-be3a-4d28cb9f6da9	BLCA_Primary_Tumor	Training Set
89fb0bfa-6ef2-4915-ba5d-ae6dcbf464a9	BLCA_Primary_Tumor	Training Set
69d6650d-0188-4fa7-b934-3fc0d36f9caa	BLCA_Primary_Tumor	Training Set
357e9db4-908a-4c67-bb04-4ce59579d3aa	BLCA_Primary_Tumor	Training Set
8d0c0e3e-b223-4974-b7d0-22e6412137aa	BLCA_Primary_Tumor	Training Set
bc33369c-a31c-4ac0-80c8-115c3ea0acaa	BLCA_Primary_Tumor	Training Set
6eccd0d4-0d13-4f7d-9445-ba1c473300ac	BLCA_Primary_Tumor	Training Set
af4b90a4-0b1c-4f3e-8014-9e5ca7dabdac	BLCA_Primary_Tumor	Training Set
a30417a9-2d50-4723-842a-45463db534ad	BLCA_Primary_Tumor	Training Set
2b055171-f33e-4d6c-9990-37e154a4fcae	BLCA_Primary_Tumor	Training Set
19c664dd-3cbe-48a0-9fe4-47b542cce4ae	BLCA_Primary_Tumor	Training Set
abcc1024-67f3-4164-b69e-de85e2bda4ae	BLCA_Primary_Tumor	Training Set
3d6ce155-4e02-4739-a8c9-30981ea9b0b1	BLCA_Primary_Tumor	Training Set
910a82c8-4fe3-42e3-af3e-fb94908018b2	BLCA_Primary_Tumor	Training Set
10e5440d-b2be-4e09-994f-ca9c57e807b3	BLCA_Primary_Tumor	Training Set
1df1c041-687f-4368-9225-7e2d03f5c2b3	BLCA_Primary_Tumor	Training Set
113a929d-1f47-45f7-ba9f-a03ffa7984b3	BLCA_Primary_Tumor	Training Set
962e56df-4a1d-473e-acbd-623243cfc5b3	BLCA_Primary_Tumor	Training Set
e6982ff2-c754-4998-8c38-83caa07151b4	BLCA_Primary_Tumor	Training Set
9972e418-efec-4aa6-aa83-98d79d74dfb4	BLCA_Primary_Tumor	Training Set
6373e1d7-f686-4989-b0bd-20b964d3f7b5	BLCA_Primary_Tumor	Training Set
d66bedca-2d42-4c45-9ade-ce2ab9c9c3b5	BLCA_Primary_Tumor	Training Set
d316c207-8020-47a7-8c2d-753cf42223b5	BLCA_Primary_Tumor	Training Set
6619b1f9-1175-4e22-8422-3aa2fb8bb0b5	BLCA_Primary_Tumor	Training Set
1ca3c03e-20a1-401e-be97-12d0e506afb8	BLCA_Primary_Tumor	Training Set
b40239c0-ba18-42ae-a1dd-3dfaec5c00b9	BLCA_Primary_Tumor	Training Set
8538d0a7-be16-41a9-901d-a2f4514e28ba	BLCA_Primary_Tumor	Training Set
2224e78e-eb9a-458c-a53c-a6f1f388bcba	BLCA_Primary_Tumor	Training Set
8a6f9c75-7aea-49ce-92e3-5058689276bc	BLCA_Primary_Tumor	Training Set
8eaaf41e-2f4d-4d8b-8af4-3497d7e047bc	BLCA_Primary_Tumor	Training Set
ca896de2-aa8a-4ef4-8d8a-5d35f13011bd	BLCA_Primary_Tumor	Training Set
e9093c51-69e0-407d-9d11-226c83dc61bd	BLCA_Primary_Tumor	Training Set
e4db5591-7c73-4792-b86f-3b2fb59c66bd	BLCA_Primary_Tumor	Training Set
5663c145-b465-4509-ba9a-1a40584952bd	BLCA_Primary_Tumor	Training Set
0999a56b-c2fa-4970-8542-d1abdd5166be	BLCA_Primary_Tumor	Training Set
63351c27-1df5-45fd-a08f-6ad2b2af8bbf	BLCA_Primary_Tumor	Training Set
bbcf0fb7-dd2a-4037-ba10-603b84b242c0	BLCA_Primary_Tumor	Training Set
f50b6ad4-1dcc-45d6-84d6-f640f7fda8c0	BLCA_Primary_Tumor	Training Set
e9894334-c852-4159-9feb-40292b160cc1	BLCA_Primary_Tumor	Training Set
a20f40c9-4fd6-41c5-9a1e-f885bd5da9c1	BLCA_Primary_Tumor	Training Set
cc960c25-e7ae-4edb-aeec-80b21cd2a7c2	BLCA_Primary_Tumor	Training Set
f5f2c2a1-4a1f-4c40-96a9-1aa18ec4c9c2	BLCA_Primary_Tumor	Training Set
33dcd9bc-e944-4b57-9f3a-11dc4814e2c2	BLCA_Primary_Tumor	Training Set
ffa0a012-76c8-4ad5-985d-27cebd96fbc3	BLCA_Primary_Tumor	Training Set
32fc134e-6424-4517-9b0c-b2e487542ec3	BLCA_Primary_Tumor	Training Set
b5bc7140-9621-4c84-81ed-d556d765a0c6	BLCA_Primary_Tumor	Training Set
248c0f63-a5ef-4f6f-9536-07febe171bc9	BLCA_Primary_Tumor	Training Set
bb8a3f9e-830a-45e2-a1ec-50020c63a7c9	BLCA_Primary_Tumor	Training Set
e1b87c08-100b-4347-b495-7698e9f8cdca	BLCA_Primary_Tumor	Training Set
ce775b7c-06ca-490b-922c-73a1e3ef34ca	BLCA_Primary_Tumor	Training Set
080423ed-8369-44eb-85e1-33cab65c7acd	BLCA_Primary_Tumor	Training Set
25f0753c-098f-4dd3-9865-c7cf2cde22ce	BLCA_Primary_Tumor	Training Set
b387e79e-742f-418b-8aab-0c721218a7d2	BLCA_Primary_Tumor	Training Set
3ea1e767-bcad-4d3b-bf88-232aa2a00ad3	BLCA_Primary_Tumor	Training Set
8c2013dc-5057-496d-9ee1-eab685d1fbd5	BLCA_Primary_Tumor	Training Set
c1323790-6c24-4e54-a266-ae66588c1dd5	BLCA_Primary_Tumor	Training Set
67d6c2f0-9c7b-451c-911e-408bb04599d6	BLCA_Primary_Tumor	Training Set
bd279be1-c25e-44f8-bc05-50065f4bddd6	BLCA_Primary_Tumor	Training Set
83cafa8c-e9dd-47e7-aab3-ea054d15cfd6	BLCA_Primary_Tumor	Training Set
bcf1dbc3-6886-4f28-b737-b972d3af68d7	BLCA_Primary_Tumor	Training Set
f6afb248-1a25-4407-91f4-d6f309aa1fd8	BLCA_Primary_Tumor	Training Set
a803f54f-6c7e-4cbc-a47c-1d0f5ec22cd8	BLCA_Primary_Tumor	Training Set
e4898c93-ded6-4739-baa3-e31f7c0208d9	BLCA_Primary_Tumor	Training Set
1191e904-0bb3-4f16-8d17-154a3ee2f4d9	BLCA_Primary_Tumor	Training Set
28ba5e13-8802-42dd-bbec-7b14679ce3d9	BLCA_Primary_Tumor	Training Set
cceb7ba1-257c-45f8-a6f8-4860a2ada4da	BLCA_Primary_Tumor	Training Set
677ae20f-4072-46ba-a7d2-9be052ed5cda	BLCA_Primary_Tumor	Training Set
2c26486a-a737-4b2f-9d98-28a700081cda	BLCA_Primary_Tumor	Training Set
41196acd-e5a1-4089-9377-5853a6d14cde	BLCA_Primary_Tumor	Training Set
aea8b4c4-b8d2-453e-b369-4dcafdcad3df	BLCA_Primary_Tumor	Training Set
8399c064-fa69-4044-b7e5-7effc8daeae0	BLCA_Primary_Tumor	Training Set
2f9b6806-bff2-45d9-95ed-44e5352f17e2	BLCA_Primary_Tumor	Training Set
85bce632-72b2-475a-8fe0-f045051b3ce5	BLCA_Primary_Tumor	Training Set
816cff9b-c10e-4265-844e-7d02f46f7ee5	BLCA_Primary_Tumor	Training Set
e9595675-4155-43bb-8e68-fc59d55c62e6	BLCA_Primary_Tumor	Training Set
2e3fbfb8-8575-4fb3-9e7f-07f5bf4466e6	BLCA_Primary_Tumor	Training Set
441495a8-8efe-4259-8275-4061546e08e8	BLCA_Primary_Tumor	Training Set
5dbbfa87-fb32-4f5e-93e2-0f26ffc2deea	BLCA_Primary_Tumor	Training Set
82c75b87-33d1-4317-ac48-7043a3d677ec	BLCA_Primary_Tumor	Training Set
5f16d2a6-bdd1-40fe-a34d-9c65d067efec	BLCA_Primary_Tumor	Training Set
dbde74d6-0b4b-4bd2-9944-48afea1410f1	BLCA_Primary_Tumor	Training Set
e93c4a65-43ce-4c2d-8dcb-29287fc969f2	BLCA_Primary_Tumor	Training Set
78f174ca-b85a-456e-a1c3-c586a54f67f2	BLCA_Primary_Tumor	Training Set
3ba01819-0e4c-4277-91cf-0b5ab2e0e3f2	BLCA_Primary_Tumor	Training Set
cea51934-4adc-4661-9a17-dae89655fdf2	BLCA_Primary_Tumor	Training Set
9f09f075-f74b-4a74-a2ea-544e34e21bf3	BLCA_Primary_Tumor	Training Set
d6654189-0570-4603-8c92-3032f2cf7ef3	BLCA_Primary_Tumor	Training Set
f7daeb35-7a57-448a-a6c5-b442bba238f3	BLCA_Primary_Tumor	Training Set
0797dc35-6243-451d-9653-9649d390c0f4	BLCA_Primary_Tumor	Training Set
4ef67f08-bf9c-42f3-938b-cded571bcff4	BLCA_Primary_Tumor	Training Set
0f55cda9-7584-4d21-96a1-79882af97cf4	BLCA_Primary_Tumor	Training Set
d2ae6d2b-8720-4381-9cda-8555c37230f5	BLCA_Primary_Tumor	Training Set
4f64614a-fddc-4728-8a72-22fccd04f8f8	BLCA_Primary_Tumor	Training Set
000f8487-e841-4370-b958-85ab3a6d88f9	BLCA_Primary_Tumor	Training Set
02c77eec-0d53-4cf0-8ff8-d8572b3724f9	BLCA_Primary_Tumor	Training Set
dd99aa8f-4f88-4ff4-8b60-b00cccea28fa	BLCA_Primary_Tumor	Training Set
daf737c4-df51-4c8c-b263-91b00b09d8fc	BLCA_Primary_Tumor	Training Set
0ff482c4-3e0b-4c3d-b35d-68bad6ee4dfc	BLCA_Primary_Tumor	Training Set
9a9dc386-eca6-4423-9dc6-401bfc4558ff	BLCA_Primary_Tumor	Training Set
6c8fcd10-3ad0-4b68-bc4b-ff47a3ad62ff	BLCA_Primary_Tumor	Training Set
5b2072ee-b856-45c4-9c14-449654a40600	BRCA_Primary_Tumor	Training Set
2ba5b847-887f-415a-a7f3-94e6ea4d3800	BRCA_Primary_Tumor	Training Set
0b1cf6de-f98f-4020-baa7-c4fc518e5f00	BRCA_Primary_Tumor	Training Set
bd879832-e177-4fca-b1ea-d1553518e700	BRCA_Primary_Tumor	Training Set
03737fb6-a59c-4618-a4e5-5fc657e42900	BRCA_Primary_Tumor	Training Set
b3382514-ecef-4a68-90e6-0e224ef11f01	BRCA_Primary_Tumor	Training Set
8865e079-d8ab-406c-8886-c854f1a26201	BRCA_Primary_Tumor	Training Set
29f2019d-5a69-497e-a7ff-73dd35fcaa01	BRCA_Primary_Tumor	Training Set
49e91d8f-37a3-4b7b-8062-d3ca8f561d01	BRCA_Primary_Tumor	Training Set
9d854730-923d-46c5-9fc4-4d6610ae9d01	BRCA_Primary_Tumor	Training Set
20c90e97-e900-488e-af6a-6648d9a8bb01	BRCA_Primary_Tumor	Training Set
44daefc1-eb50-4fad-98db-7724c1e2c201	BRCA_Primary_Tumor	Training Set
d7d72329-a22b-459f-a617-e1c72b8f4c02	BRCA_Primary_Tumor	Training Set
0a2fa7c7-0810-4d65-b16c-4a1792714802	BRCA_Primary_Tumor	Training Set
cc668ff4-1dc9-44bb-8858-1417e8809502	BRCA_Primary_Tumor	Training Set
02d1c342-bc77-49cc-a039-39a961521602	BRCA_Primary_Tumor	Training Set
f1099b84-fe2a-419c-9948-d0754c1af902	BRCA_Primary_Tumor	Training Set
8d0796cc-648d-4264-ada1-fd4e9dfb8c02	BRCA_Primary_Tumor	Training Set
c705fa90-d9aa-4949-baca-1c022a14cb03	BRCA_Primary_Tumor	Training Set
cdec90ec-016b-4c68-82aa-7ee297188b03	BRCA_Primary_Tumor	Training Set
839ec959-1497-45dc-8e46-b5c285215603	BRCA_Primary_Tumor	Training Set
35f6a061-a257-482a-8a72-6e0bff199503	BRCA_Primary_Tumor	Training Set
cb2498a3-ade5-44a1-9df8-c611cde2ae03	BRCA_Primary_Tumor	Training Set
3b0f668b-236f-43f5-a2ff-1898b9687604	BRCA_Primary_Tumor	Training Set
37121acd-04e3-4d85-a472-bd3638720004	BRCA_Primary_Tumor	Training Set
f7b7f7e8-612f-46d4-bf4a-63befa5acb04	BRCA_Primary_Tumor	Training Set
bc922f18-a6a9-4f1c-b3c9-c7628ad04a04	BRCA_Primary_Tumor	Training Set
8faa604b-bdc4-4481-89a7-0ab6f4839c04	BRCA_Primary_Tumor	Training Set
808c3b2a-4b4d-49e6-b60e-2e05f7e9ca04	BRCA_Primary_Tumor	Training Set
a9da8022-ce84-4c1f-a483-c2ef6f085505	BRCA_Primary_Tumor	Training Set
03e71bd3-8fc7-4f34-96e7-b0e3a9ac4b05	BRCA_Primary_Tumor	Training Set
0fa547f8-cedf-46ac-9d8f-5498dfb6ea06	BRCA_Primary_Tumor	Training Set
3c73d820-4cb0-4c21-9a79-aad1bf406706	BRCA_Primary_Tumor	Training Set
9ddfb5a1-dbd3-43f2-9fdb-fe64bf3e3c07	BRCA_Primary_Tumor	Training Set
30f32969-5278-4066-bb82-7400cdce8807	BRCA_Primary_Tumor	Training Set
fd2f2372-cfc0-4918-a03f-a53974cbfc07	BRCA_Primary_Tumor	Training Set
a9237a7a-3c6c-44e7-b2a9-b2e4b1a45b07	BRCA_Primary_Tumor	Training Set
aeb7ccc8-cb30-4640-8995-e12113160e08	BRCA_Primary_Tumor	Training Set
6588314e-69e9-44dc-b7d0-0966c1833608	BRCA_Primary_Tumor	Training Set
56c4ca91-26bf-4589-9232-c6400adc1a08	BRCA_Primary_Tumor	Training Set
732decd2-bfaf-409d-ae30-efc76c195e08	BRCA_Primary_Tumor	Training Set
2a9ed6f1-3f93-43cf-9e47-6690781e1009	BRCA_Primary_Tumor	Training Set
e61e01b8-3719-4ae2-a906-8d963eaad309	BRCA_Primary_Tumor	Training Set
39ecb041-7ba9-428b-8d8b-44a06d50e309	BRCA_Primary_Tumor	Training Set
f9e194a1-e5c1-4a1a-840b-4e0246640d09	BRCA_Primary_Tumor	Training Set
d08b9d87-7327-4d2c-8b10-8a3973b99209	BRCA_Primary_Tumor	Training Set
7804f23a-10f9-4ac1-a0fa-b1370fc68c09	BRCA_Primary_Tumor	Training Set
6418884f-19d9-4101-a35c-6f1f43a4690a	BRCA_Primary_Tumor	Training Set
05127463-a69a-42b3-9635-575a08eb980a	BRCA_Primary_Tumor	Training Set
1ca20860-4a2e-4d34-a479-5b56facc2c0a	BRCA_Primary_Tumor	Training Set
e6281a02-850b-405e-af4d-e79967552f0a	BRCA_Primary_Tumor	Training Set
14b4bcfa-5b10-4aed-ab47-edf73b252d0b	BRCA_Primary_Tumor	Training Set
a39b6b48-a0cc-49f4-beee-119a5777ac0c	BRCA_Primary_Tumor	Training Set
d7814767-c4ec-43ce-9cb2-646941b2870c	BRCA_Primary_Tumor	Training Set
0273b169-68db-41f4-907b-bdb54f064a0c	BRCA_Primary_Tumor	Training Set
4afbad57-ec36-4887-9c26-70a4564c520c	BRCA_Primary_Tumor	Training Set
3d3453a8-9260-4bd0-a4e6-a21feabc750c	BRCA_Primary_Tumor	Training Set
072bac5f-4e09-4831-9c32-f42b94c4b30d	BRCA_Primary_Tumor	Training Set
9a2c9224-ec66-4560-b909-08144c67e00d	BRCA_Primary_Tumor	Training Set
4f579967-6cb9-4672-ba7a-f94f789b280e	BRCA_Primary_Tumor	Training Set
2a7d9ae7-6458-4e34-aab2-212f2e62030e	BRCA_Primary_Tumor	Training Set
ace4837a-dd3a-4668-a67a-d7ba9b51980f	BRCA_Primary_Tumor	Training Set
a03bda91-0936-4c67-9508-4903f84c980f	BRCA_Primary_Tumor	Training Set
4913ff90-e563-48e0-a632-a6cff90d810f	BRCA_Primary_Tumor	Training Set
46c0f948-2eac-41f7-b490-fbca1724d710	BRCA_Primary_Tumor	Training Set
d0213ff6-3b56-440a-8d5d-53f6e6c70f11	BRCA_Primary_Tumor	Training Set
70939556-123f-45c0-b55f-4843adad8811	BRCA_Primary_Tumor	Training Set
58305698-457f-4e9d-a27d-7b8f98491411	BRCA_Primary_Tumor	Training Set
972a70ec-e428-4609-893d-6128a4d62811	BRCA_Primary_Tumor	Training Set
d021a258-8713-4383-9dca-45e2f54a0411	BRCA_Primary_Tumor	Training Set
6203b63e-6d3f-4399-b524-9573a9bd1e11	BRCA_Primary_Tumor	Training Set
ae15cbbe-2658-4d9a-ace3-4609df63f512	BRCA_Primary_Tumor	Training Set
f1b395cb-70e2-420e-9e15-1afd66eabe12	BRCA_Primary_Tumor	Training Set
7dc36399-268a-4388-ada7-4a56ea3f0712	BRCA_Primary_Tumor	Training Set
419d0065-52aa-4340-9fdd-9b2b15f44412	BRCA_Primary_Tumor	Training Set
27a2d405-3fe3-45ca-8150-f0567e310512	BRCA_Primary_Tumor	Training Set
049dd36f-6e0f-4693-a8fa-5f4042156612	BRCA_Primary_Tumor	Training Set
a6e7a318-eaa0-4ac3-8cdd-54efbcc59113	BRCA_Primary_Tumor	Training Set
3c032234-c350-4170-b8f7-f8de8269e713	BRCA_Primary_Tumor	Training Set
6985560f-33fe-435f-83e0-cbd9e0c20413	BRCA_Primary_Tumor	Training Set
8a9c0b95-4830-45c3-a596-75c2f22cfa14	BRCA_Primary_Tumor	Training Set
016952d0-ae1b-4467-8250-fa799e757814	BRCA_Primary_Tumor	Training Set
0a71c7b0-ef68-466e-b294-b2f52ed79c14	BRCA_Primary_Tumor	Training Set
9d614398-19ae-40b1-99b6-c1099af43915	BRCA_Primary_Tumor	Training Set
af7561da-6f36-4509-bfed-4df29e489315	BRCA_Primary_Tumor	Training Set
8bb1342a-2fed-4cba-ad61-5290a05ab615	BRCA_Primary_Tumor	Training Set
80b4e7d6-c931-426f-810e-b6059d2c6f15	BRCA_Primary_Tumor	Training Set
db138158-49e4-46b2-8ba6-4a72ff418216	BRCA_Primary_Tumor	Training Set
1ce73491-493d-44b6-8ab5-705f10f5df16	BRCA_Primary_Tumor	Training Set
42aaae48-01cc-4010-bef6-ccd49202e816	BRCA_Primary_Tumor	Training Set
12fd30ff-4d3a-4920-bf80-f44132824017	BRCA_Primary_Tumor	Training Set
13ef5323-ead9-4bc7-8ac4-33875bf12e17	BRCA_Primary_Tumor	Training Set
9e8b9fc7-ff0e-4e2e-aa8b-697a995a7317	BRCA_Primary_Tumor	Training Set
c07800c1-91b6-4612-9831-f4f6fc6cf318	BRCA_Primary_Tumor	Training Set
27cf9f15-9e74-462c-b999-980740829e18	BRCA_Primary_Tumor	Training Set
f5f7b591-062d-4ff0-ab68-73d678574318	BRCA_Primary_Tumor	Training Set
714144ba-cb6d-4f15-91a7-e0873ee4dd18	BRCA_Primary_Tumor	Training Set
65821138-c294-4af7-b2eb-f671b3f3ba19	BRCA_Primary_Tumor	Training Set
b2d67d4c-8555-4ba8-965a-ab42ef516119	BRCA_Primary_Tumor	Training Set
dcd49265-d7bb-482f-b1da-d5d4098e9f1a	BRCA_Primary_Tumor	Training Set
3420e4dd-879a-44f0-b7bb-5cdd8bd5401a	BRCA_Primary_Tumor	Training Set
4d112bd8-1a35-43cb-896a-16f48147811b	BRCA_Primary_Tumor	Training Set
6198b84c-490a-426d-a43e-afd8be5a211b	BRCA_Primary_Tumor	Training Set
1b04b428-7c0d-49a2-b08a-072fa715ad1b	BRCA_Primary_Tumor	Training Set
8a397cf1-08c5-4772-9dd6-9c4b6fdece1c	BRCA_Primary_Tumor	Training Set
bcc71ff5-8729-4e6b-8c2c-471f80a4f91d	BRCA_Primary_Tumor	Training Set
4e92867a-7834-45df-aae7-a680ef37cd1d	BRCA_Primary_Tumor	Training Set
e1ffc76b-1f86-4776-a6de-a488c5a1261d	BRCA_Primary_Tumor	Training Set
ba714d2c-c88f-44c8-85cb-de57055bab1d	BRCA_Primary_Tumor	Training Set
56338cf6-8216-4cec-9a81-bf01d543591d	BRCA_Primary_Tumor	Training Set
b506ab36-78b0-4b0e-b6e4-e241bba4961d	BRCA_Primary_Tumor	Training Set
b749ab2f-23d0-4d79-b35e-f17daa62091e	BRCA_Primary_Tumor	Training Set
86bcff5a-f4d4-43d3-810b-1b32832e541f	BRCA_Primary_Tumor	Training Set
0a770cd6-c9b1-4cc4-9e31-1f8a820c5c1f	BRCA_Primary_Tumor	Training Set
dc8f9745-b45d-4fc7-9bb8-9733a33de41f	BRCA_Primary_Tumor	Training Set
8cf5a2c0-93cb-40bb-8b7c-d07dcd830a20	BRCA_Primary_Tumor	Training Set
b6e47b05-afe9-41b5-b040-7fbcc62d4720	BRCA_Primary_Tumor	Training Set
6a193b2e-ea8d-4cbe-8eae-b2486e65c920	BRCA_Primary_Tumor	Training Set
039d56da-2740-4fae-bee7-ab7f5bba8a20	BRCA_Primary_Tumor	Training Set
ae5e85d4-0b93-44cc-b846-7e893ca67b21	BRCA_Primary_Tumor	Training Set
8999059b-74b5-4388-afdb-457c9fd24421	BRCA_Primary_Tumor	Training Set
a0b6932b-d530-4b47-b1f5-b8429a3d3d22	BRCA_Primary_Tumor	Training Set
190129a6-ba80-4728-9638-9e2e1bb7b422	BRCA_Primary_Tumor	Training Set
90efd0b1-6cba-4860-92db-6cd6f04c8422	BRCA_Primary_Tumor	Training Set
3cc6581c-57dc-431b-a699-a479a3fa3823	BRCA_Primary_Tumor	Training Set
0ac5f4b6-c269-4dac-9f84-8ddcb5227823	BRCA_Primary_Tumor	Training Set
b5f328db-3d7d-4b9a-a5e1-639f07865f23	BRCA_Primary_Tumor	Training Set
e6c48482-0ad8-4b4c-9fb9-c3594e198024	BRCA_Primary_Tumor	Training Set
79807938-a28e-4f9f-ae07-ee97778f5424	BRCA_Primary_Tumor	Training Set
727911b5-45aa-42a6-8d32-4d131c8b0824	BRCA_Primary_Tumor	Training Set
41c86eb6-00e3-4ef9-b4ab-165e97513825	BRCA_Primary_Tumor	Training Set
6cf498ba-46d9-451f-b65a-e649964e5d25	BRCA_Primary_Tumor	Training Set
a04dfaf8-6727-4838-8c69-636a608bdf25	BRCA_Primary_Tumor	Training Set
f9135d0d-6447-4452-8ea8-98dee4610226	BRCA_Primary_Tumor	Training Set
46384059-8ee2-4c89-8a48-cddeaa10ea26	BRCA_Primary_Tumor	Training Set
56e9187b-cc61-4553-8976-96dd64e21226	BRCA_Primary_Tumor	Training Set
8a082588-a4f5-4cf4-8a61-fb1a13582026	BRCA_Primary_Tumor	Training Set
26876e4f-dbf2-42ed-8fc4-62529029c826	BRCA_Primary_Tumor	Training Set
b013fb96-a517-46ec-8877-4ae84c01ae27	BRCA_Primary_Tumor	Training Set
601d287e-1f5c-4ac7-a4a4-85bd89ad5327	BRCA_Primary_Tumor	Training Set
8df83379-a2c6-44f1-86fe-bc691eb09027	BRCA_Primary_Tumor	Training Set
62a348d2-e7fd-48d0-9622-8b485da5e327	BRCA_Primary_Tumor	Training Set
8d53e953-da0b-4734-815b-0cb6dd129827	BRCA_Primary_Tumor	Training Set
f265488f-7ebf-4be3-90fb-178543d05a28	BRCA_Primary_Tumor	Training Set
21bfabfe-7c78-4879-bec0-74c0cfd20529	BRCA_Primary_Tumor	Training Set
905f2f5b-4bf9-449c-a070-5d2cce702e29	BRCA_Primary_Tumor	Training Set
dd6e96bc-ff4a-4d29-a4e7-a9cb1c30c229	BRCA_Primary_Tumor	Training Set
77345d95-a2e7-4057-932a-281718d42a29	BRCA_Primary_Tumor	Training Set
02580b63-8da8-4a9d-99b7-5747008ab42a	BRCA_Primary_Tumor	Training Set
417cb3fa-2125-42ce-a638-51952c81dc2b	BRCA_Primary_Tumor	Training Set
1874e6bb-c86a-4eca-b16d-58dd5dbdb82c	BRCA_Primary_Tumor	Training Set
eae06b7b-48b0-47d6-9263-0f92eda3652c	BRCA_Primary_Tumor	Training Set
182f11ac-134d-4eb1-a19d-dad086d6dd2c	BRCA_Primary_Tumor	Training Set
464746f6-2c7a-4969-859a-77830222752d	BRCA_Primary_Tumor	Training Set
17e8321e-7265-486e-8ec8-a5ebb547892d	BRCA_Primary_Tumor	Training Set
7dd62104-6535-4900-9865-de45a287372d	BRCA_Primary_Tumor	Training Set
117a3e8a-4568-44a6-baee-9a5ab002042d	BRCA_Primary_Tumor	Training Set
a685febf-4cb8-4eaa-8fc8-859f97fb7f2d	BRCA_Primary_Tumor	Training Set
286cbf20-c36a-434d-b491-17a1515c132e	BRCA_Primary_Tumor	Training Set
bd9f2a8c-9e65-4aa9-88c9-70dfddedd82e	BRCA_Primary_Tumor	Training Set
d44498fc-61f6-493a-aa1b-8ce9424c2b2e	BRCA_Primary_Tumor	Training Set
a33b2f42-6ec6-4fb2-8be5-542407a0382e	BRCA_Primary_Tumor	Training Set
1d6b448c-1d01-4a8c-8417-b094ec2d562e	BRCA_Primary_Tumor	Training Set
052f5358-94f2-44f2-b52b-a79068eb032f	BRCA_Primary_Tumor	Training Set
e0b3c5d3-a6b3-4516-97e4-ae8796c8b12f	BRCA_Primary_Tumor	Training Set
b66df40b-0b1f-4852-983f-a497fc14852f	BRCA_Primary_Tumor	Training Set
708eafa6-a04c-4799-b9c2-add56c030c2f	BRCA_Primary_Tumor	Training Set
b2ab1b82-6ee3-4c66-a6a6-6c64cfc6012f	BRCA_Primary_Tumor	Training Set
9121500e-1757-4024-963b-2d875e66932f	BRCA_Primary_Tumor	Training Set
0a60e43d-2bdb-4dc1-b9f3-336c89c2272f	BRCA_Primary_Tumor	Training Set
b63edf98-ed66-485d-bea8-9ebb5666d030	BRCA_Primary_Tumor	Training Set
39ceff6e-a829-49b2-a5a0-895cac8be530	BRCA_Primary_Tumor	Training Set
223d08aa-7572-486f-aa1d-38f1919d0630	BRCA_Primary_Tumor	Training Set
fe3d3c9b-7f30-4359-9904-48612503f531	BRCA_Primary_Tumor	Training Set
3d4d1fa7-da4f-44cd-aa52-b8963cd61f31	BRCA_Primary_Tumor	Training Set
5d84f068-72eb-44aa-ad9d-6f8eaa4a8a32	BRCA_Primary_Tumor	Training Set
452e1409-8d75-4cfa-af87-706edf3e8732	BRCA_Primary_Tumor	Training Set
3507cf96-965a-44f3-98f3-d8adef372832	BRCA_Primary_Tumor	Training Set
454383cb-3cb3-4b8c-8078-a2ec27139d33	BRCA_Primary_Tumor	Training Set
21821b38-6786-4078-9918-ec0e877c1533	BRCA_Primary_Tumor	Training Set
64f561ff-896f-44ae-9807-2a299c81c633	BRCA_Primary_Tumor	Training Set
118d1959-5b7b-4d2c-9e9f-970613f0e133	BRCA_Primary_Tumor	Training Set
818b0b25-5543-4d05-9205-1899ec64d733	BRCA_Primary_Tumor	Training Set
c681e7bd-8307-4753-8309-6f4abe9a6433	BRCA_Primary_Tumor	Training Set
e2a25905-7c92-4e43-81c0-d09268014334	BRCA_Primary_Tumor	Training Set
06b39bb2-3381-4452-8000-ecaae10c1734	BRCA_Primary_Tumor	Training Set
8b3b9337-038a-4385-af58-d285a3706234	BRCA_Primary_Tumor	Training Set
64ba791a-c418-4507-bf64-b4b473c78834	BRCA_Primary_Tumor	Training Set
6aa999cb-5d78-463b-9068-720c09eb9d34	BRCA_Primary_Tumor	Training Set
9d241e1b-2375-486a-ae6c-fba936cf5734	BRCA_Primary_Tumor	Training Set
208eb3f1-6bc7-401c-a8d8-3ab793b39d34	BRCA_Primary_Tumor	Training Set
9d4e55f2-fcd1-4523-8879-44f95bc3da35	BRCA_Primary_Tumor	Training Set
7b7dbea3-df47-4051-8a58-548705a21035	BRCA_Primary_Tumor	Training Set
1b8dfe86-a00f-48ae-8956-377f5812ff35	BRCA_Primary_Tumor	Training Set
a59040e1-6d0b-49f1-b4b3-bd96b0e98536	BRCA_Primary_Tumor	Training Set
af5a3afa-0e81-4864-b51d-7e857804c336	BRCA_Primary_Tumor	Training Set
baf01317-033e-4198-9d66-e91c7fc2bd37	BRCA_Primary_Tumor	Training Set
a4318da0-6021-4931-a583-1087bd2bc837	BRCA_Primary_Tumor	Training Set
150feeb1-7643-4b1c-a77c-cfd97d301d37	BRCA_Primary_Tumor	Training Set
91714b41-6550-4638-bc95-bd9bd8163f37	BRCA_Primary_Tumor	Training Set
05360705-c0c6-43e1-82f1-db17a4f49038	BRCA_Primary_Tumor	Training Set
48bd0e00-be54-47a2-9aed-73c0c863fd39	BRCA_Primary_Tumor	Training Set
8236a77b-e07e-4859-86c4-c154f706c239	BRCA_Primary_Tumor	Training Set
6a6420f7-3618-4d8e-b4c2-d6e6eddcda39	BRCA_Primary_Tumor	Training Set
04a48065-ea14-4c82-82df-b7784d70193a	BRCA_Primary_Tumor	Training Set
03b92f89-07b6-4306-954e-a4a52d4a113a	BRCA_Primary_Tumor	Training Set
3738df37-7bd7-4b3b-a4bb-4aca77a4573a	BRCA_Primary_Tumor	Training Set
d512d7d6-0f5f-484c-a4eb-20fcce53643a	BRCA_Primary_Tumor	Training Set
8f055354-92f2-4d3e-b47b-d17aac07f93a	BRCA_Primary_Tumor	Training Set
cf2ec046-7565-4bba-be63-1a859ee6ff3a	BRCA_Primary_Tumor	Training Set
27c0eebe-589f-41d9-8bf7-c7da0ed87a3b	BRCA_Primary_Tumor	Training Set
7b27cb5e-2f49-49e7-af4d-59918800eb3b	BRCA_Primary_Tumor	Training Set
b33d0b10-4c33-4001-93ff-a5ffa2aa353c	BRCA_Primary_Tumor	Training Set
8b76dba5-6848-499e-9fb3-611dff72123c	BRCA_Primary_Tumor	Training Set
724c1952-4366-4daa-929d-cdb46478d03d	BRCA_Primary_Tumor	Training Set
f26e9388-145f-4c86-bf5b-5dfefae6f43d	BRCA_Primary_Tumor	Training Set
c0ff6201-9bfd-4c95-9770-b122d8206c3d	BRCA_Primary_Tumor	Training Set
1ec51eab-f7e7-44f2-a90e-f0d5b073833d	BRCA_Primary_Tumor	Training Set
dc7c1407-1b5f-4827-b319-810babcb9a3e	BRCA_Primary_Tumor	Training Set
e0435ff5-5847-48f4-9f7b-40da5ab52e3e	BRCA_Primary_Tumor	Training Set
6a2e15d6-5304-4d3e-a18c-bac86e50133f	BRCA_Primary_Tumor	Training Set
421e2607-50fa-4260-bd10-c37fcb7d063f	BRCA_Primary_Tumor	Training Set
826a2901-1c17-44a4-84a5-bc6f54d10a3f	BRCA_Primary_Tumor	Training Set
ecdaf208-d5e1-44b3-a181-cee1d9440e40	BRCA_Primary_Tumor	Training Set
fa5bca6c-a84e-4baa-9af4-3304f6364440	BRCA_Primary_Tumor	Training Set
b614cf54-cecf-44c1-813e-6b036b071d41	BRCA_Primary_Tumor	Training Set
de5d6071-f5f3-4d8d-be76-a49d92014641	BRCA_Primary_Tumor	Training Set
e1d2bac2-664c-4e09-b008-b879aab76841	BRCA_Primary_Tumor	Training Set
7bb7891b-0697-466a-a003-4f9e06358d41	BRCA_Primary_Tumor	Training Set
775e9758-cba2-4b87-844a-120e56fe2141	BRCA_Primary_Tumor	Training Set
97c6b590-2c15-446e-b31b-444880489441	BRCA_Primary_Tumor	Training Set
3508f4b0-1ada-4937-b924-424ac2596341	BRCA_Primary_Tumor	Training Set
07b99b18-192f-40a4-86b4-219eee164d42	BRCA_Primary_Tumor	Training Set
fca0db35-708a-45a5-8f18-cc0b0a123f42	BRCA_Primary_Tumor	Training Set
29c63350-f03b-4c65-979c-53ae84e20042	BRCA_Primary_Tumor	Training Set
16b2f770-0357-4de9-b0bf-7c546b169042	BRCA_Primary_Tumor	Training Set
0b10c68d-9ac5-4c64-9233-2eb9c4a8a942	BRCA_Primary_Tumor	Training Set
24e09ef7-b902-4624-a7fa-1b649e3ec142	BRCA_Primary_Tumor	Training Set
ef1c5f5b-ee6e-41a3-b6ce-5b0321d7d742	BRCA_Primary_Tumor	Training Set
76376038-5810-476b-831f-9bb938941243	BRCA_Primary_Tumor	Training Set
e959e8bd-d13c-43c2-840b-8e19211eb643	BRCA_Primary_Tumor	Training Set
17899f0b-76dd-48ef-893e-c7e95118b243	BRCA_Primary_Tumor	Training Set
47129fda-ac0c-422f-b7e3-f293cd1c5443	BRCA_Primary_Tumor	Training Set
97195e98-3256-464d-89a2-f025edc38c43	BRCA_Primary_Tumor	Training Set
17ca0dc6-8ff2-4d03-adf7-b12ac8c5da44	BRCA_Primary_Tumor	Training Set
c4ec541d-8bea-4b1d-8e7d-83b04e349944	BRCA_Primary_Tumor	Training Set
994570f9-404b-471c-a5c3-78e59480dd44	BRCA_Primary_Tumor	Training Set
d330b86e-5373-49b2-87c6-dc5ed2021b45	BRCA_Primary_Tumor	Training Set
8a1c823b-62df-4c1f-9d0f-bbf4d93e3245	BRCA_Primary_Tumor	Training Set
ab68528c-cf90-425b-bf92-33d5e4c54345	BRCA_Primary_Tumor	Training Set
90f71a59-d80a-4b73-9466-4a5fd6717845	BRCA_Primary_Tumor	Training Set
ce80ac41-e93c-4aeb-a3fe-ae7c7806b545	BRCA_Primary_Tumor	Training Set
094703fe-a2ec-49de-aefb-dd1dd3d80f46	BRCA_Primary_Tumor	Training Set
80a10e2c-6e0b-4b9e-b3b4-086a7cda9a46	BRCA_Primary_Tumor	Training Set
e313b1bb-b85a-4dd9-baa8-017bfbd87146	BRCA_Primary_Tumor	Training Set
a45a86c9-8168-4036-b186-db471eb53546	BRCA_Primary_Tumor	Training Set
82a7523d-02c1-4f75-956a-b95519dd7547	BRCA_Primary_Tumor	Training Set
35e082f4-aa88-4b71-a9ee-19bd7e4d4847	BRCA_Primary_Tumor	Training Set
29635f4d-3149-49bc-b960-ff863d10f747	BRCA_Primary_Tumor	Training Set
9807dfab-fccb-437c-8ec1-f3a670b24947	BRCA_Primary_Tumor	Training Set
88fcc5d7-dc8f-4349-b809-dc6764f48748	BRCA_Primary_Tumor	Training Set
0a3920c0-d113-4ccb-b696-ecadfa681148	BRCA_Primary_Tumor	Training Set
2b231d54-66bc-4f57-bd7d-944f5460cb48	BRCA_Primary_Tumor	Training Set
db7fd043-2a8f-480a-a208-912d99ce8848	BRCA_Primary_Tumor	Training Set
155e54f9-9791-42e7-9d6a-26c1d09e3948	BRCA_Primary_Tumor	Training Set
108e4f62-aa05-4297-9bc2-2fb82d687349	BRCA_Primary_Tumor	Training Set
0c5866d5-41e9-4a62-a84e-5ad63879e249	BRCA_Primary_Tumor	Training Set
836f841e-4b66-4ab0-957a-5c62be787e49	BRCA_Primary_Tumor	Training Set
d5bf82b7-7508-4773-a104-cff25a557149	BRCA_Primary_Tumor	Training Set
90db18fe-20cc-4241-b66a-eaa3d5391d4a	BRCA_Primary_Tumor	Training Set
b79c0636-2e0f-4639-9084-b6ecbc64414a	BRCA_Primary_Tumor	Training Set
16326873-7589-4840-ba46-6b2995e2dd4a	BRCA_Primary_Tumor	Training Set
e634b7db-eab9-4986-895d-d9732c681c4b	BRCA_Primary_Tumor	Training Set
1a258ee7-6bbc-4fa0-bc26-9c5243d7b04b	BRCA_Primary_Tumor	Training Set
fe646ed8-aa01-4cf1-bff4-1e9198e13a4b	BRCA_Primary_Tumor	Training Set
2f879a27-186a-4134-8f08-cc885134564b	BRCA_Primary_Tumor	Training Set
795d478d-e1fe-49eb-92ad-8b1b145f944b	BRCA_Primary_Tumor	Training Set
60c90f17-b6c5-4a39-b4ec-a74c669b484b	BRCA_Primary_Tumor	Training Set
04d86cf5-1b75-440b-9dc1-9b5bb2471c4c	BRCA_Primary_Tumor	Training Set
4c14d929-c320-43ea-95bf-781c3eda174c	BRCA_Primary_Tumor	Training Set
a48d1663-22e8-4f98-af8a-53ececfa5f4c	BRCA_Primary_Tumor	Training Set
38fd8c2f-fa63-4e3f-b803-651c7fc4844c	BRCA_Primary_Tumor	Training Set
55fee8d3-acd5-4366-ac30-c66225debe4d	BRCA_Primary_Tumor	Training Set
cfd5c33b-c102-4f62-b34d-c178342ceb4d	BRCA_Primary_Tumor	Training Set
3df0cb8f-4559-40ce-bcf4-4b038929fb4e	BRCA_Primary_Tumor	Training Set
7ebc9015-6907-4467-9468-bc1b57c9b24e	BRCA_Primary_Tumor	Training Set
c6fb2026-b740-459e-9831-93279bbf354e	BRCA_Primary_Tumor	Training Set
c90142d8-f939-4fea-bc48-073d2814f54e	BRCA_Primary_Tumor	Training Set
00f7bc18-f333-4231-8d78-338ef77e394f	BRCA_Metastatic	Training Set
f345b65f-b055-4714-be04-8aa66320ad4f	BRCA_Primary_Tumor	Training Set
775d6b64-4d07-4afb-b227-38ffbd154b4f	BRCA_Primary_Tumor	Training Set
9aabe7f6-9ea3-41e9-b763-418bada1cf4f	BRCA_Primary_Tumor	Training Set
bea15d17-963a-413e-80ed-828edb735550	BRCA_Primary_Tumor	Training Set
42df9529-b684-4aed-ad7b-83bfedec0751	BRCA_Primary_Tumor	Training Set
b8de7c7f-5de1-45b9-948d-cf5df3850551	BRCA_Primary_Tumor	Training Set
e9a9b482-a15b-493b-891c-387e2f327751	BRCA_Primary_Tumor	Training Set
faa284cf-abd4-4405-b847-ad06672bf451	BRCA_Primary_Tumor	Training Set
bdd03456-777b-4e94-8240-cd6b1d4eac51	BRCA_Primary_Tumor	Training Set
6f54f9c0-5687-4a07-bf75-b506752b4a52	BRCA_Primary_Tumor	Training Set
d671e954-4cac-4449-8eb1-163e478fe052	BRCA_Primary_Tumor	Training Set
3ddaa477-d3c0-4df0-8c22-99c41e0b3d53	BRCA_Primary_Tumor	Training Set
19fed966-01a5-412e-82a0-f72f4d42cd53	BRCA_Primary_Tumor	Training Set
0141f9ca-a8a1-4ea4-b194-6c3afb943253	BRCA_Primary_Tumor	Training Set
4885697c-841e-4839-956f-cc050578f453	BRCA_Primary_Tumor	Training Set
2a131c31-6c59-457a-8926-f88ac5c57f54	BRCA_Primary_Tumor	Training Set
1ed844b9-60e2-4e6b-aec1-6b9489147a54	BRCA_Primary_Tumor	Training Set
a745888d-3960-494d-9bbb-296f515aec54	BRCA_Primary_Tumor	Training Set
8514955c-57d3-4d01-9cd6-da04592f4955	BRCA_Primary_Tumor	Training Set
2356b998-0930-403f-9b04-57a18a150955	BRCA_Primary_Tumor	Training Set
0e23c7f9-d54f-4a6b-b1da-f28e09c9ab55	BRCA_Primary_Tumor	Training Set
ae43ff42-0266-4cd1-8c27-c3a2db9c4f55	BRCA_Primary_Tumor	Training Set
34ac430e-2cbf-4047-9a9c-210e7ae24f55	BRCA_Primary_Tumor	Training Set
b8042e2c-b5c3-42bc-9149-e56e952e5a56	BRCA_Primary_Tumor	Training Set
3551ea04-99f5-4748-8304-6a63e77ae756	BRCA_Primary_Tumor	Training Set
9065dbef-8bea-4e06-a4e5-f4c422b47a56	BRCA_Primary_Tumor	Training Set
842b272a-9f51-4919-b7c1-a16a2f410b57	BRCA_Primary_Tumor	Training Set
a39ba4b3-40c6-479c-9407-01616194b057	BRCA_Primary_Tumor	Training Set
1b75bbe2-56c5-4979-b6f3-2e79c7642057	BRCA_Primary_Tumor	Training Set
4864018c-b8fd-426f-80e9-14f4adf29557	BRCA_Primary_Tumor	Training Set
6fd76033-7c26-440c-beca-144bd18f7d58	BRCA_Primary_Tumor	Training Set
da98a67c-f11f-41d3-8223-1161ebff8b58	BRCA_Primary_Tumor	Training Set
8c3b9672-d44c-4df4-9912-47f93f0a5c58	BRCA_Primary_Tumor	Training Set
8c0e3f5d-e5f0-4b6f-85db-a18cfba08758	BRCA_Primary_Tumor	Training Set
f7b0d141-4d33-4a6e-8e05-08f7cf325459	BRCA_Primary_Tumor	Training Set
00f5f2e4-2971-46e4-ae00-35fe31af4e59	BRCA_Primary_Tumor	Training Set
b715c1bf-c3e1-43b5-8480-462f38692e59	BRCA_Primary_Tumor	Training Set
dbfa1780-4558-436a-a434-05dafd0f675a	BRCA_Primary_Tumor	Training Set
bcceb33f-d17a-4986-bb39-15cde059415a	BRCA_Primary_Tumor	Training Set
cb75fb62-e6e9-4763-a97c-1a2b919adc5a	BRCA_Primary_Tumor	Training Set
08231a66-dd8e-40b0-9aec-850ad057735b	BRCA_Primary_Tumor	Training Set
b8e6b405-7d74-4fb8-be43-73af4abe105b	BRCA_Primary_Tumor	Training Set
b177e48f-77cb-445d-b938-260312ad175b	BRCA_Primary_Tumor	Training Set
44047435-3e87-473a-9231-b61fb0d5045b	BRCA_Primary_Tumor	Training Set
ec9dd1b9-15aa-441d-8d80-d32f663b3a5c	BRCA_Primary_Tumor	Training Set
382d9830-4cd6-4c06-9c87-9a83dd01e25c	BRCA_Primary_Tumor	Training Set
0375efb7-6afa-416e-96fa-c9a69ad7e95d	BRCA_Primary_Tumor	Training Set
9ac00677-9ba1-4ee9-bf02-ecb04533f45d	BRCA_Primary_Tumor	Training Set
41396ec8-55b6-4a3d-b5c4-ca6bea83b75d	BRCA_Primary_Tumor	Training Set
cc7ddd96-a901-4a85-8869-0c7be002ae5d	BRCA_Primary_Tumor	Training Set
0d957b8d-6ba2-45c9-ad9c-5756e79f685d	BRCA_Primary_Tumor	Training Set
9e9d512c-c175-4e94-bdd7-9df6fef2fb5d	BRCA_Primary_Tumor	Training Set
8fb28200-513f-4697-8b49-65cc424fdf5e	BRCA_Primary_Tumor	Training Set
9ed7137b-acec-4eb0-868f-cbfef00ce85e	BRCA_Primary_Tumor	Training Set
42dca292-7292-4162-994f-ffbc0102c55e	BRCA_Primary_Tumor	Training Set
ab75bca7-5635-4839-a178-120a02ef575f	BRCA_Primary_Tumor	Training Set
f454329b-0b6c-49a4-8336-8d6dc0e2d95f	BRCA_Primary_Tumor	Training Set
b11edd8f-c129-455e-ad2d-491f80f36a60	BRCA_Primary_Tumor	Training Set
00f70d11-3b58-4517-82ec-258cced34a60	BRCA_Primary_Tumor	Training Set
50802536-2841-42cf-afd6-4c90151b7e60	BRCA_Primary_Tumor	Training Set
b178a8cb-b28c-4fed-a8ae-d4e37ae39261	BRCA_Primary_Tumor	Training Set
6735b42c-e2cd-4b24-9ac2-5ba1468acd61	BRCA_Primary_Tumor	Training Set
0357e675-f83e-4aa6-9205-c72c0614a661	BRCA_Primary_Tumor	Training Set
eb068925-2dcc-4e18-838f-903ac8d2b661	BRCA_Primary_Tumor	Training Set
5836f2d8-cb09-4aff-9cdd-45eeaf835262	BRCA_Primary_Tumor	Training Set
2c527579-8b48-49b4-8383-8c084c046c62	BRCA_Primary_Tumor	Training Set
444a731f-500e-4c09-8765-d961b0062662	BRCA_Primary_Tumor	Training Set
1302a36d-ea6d-4909-bac2-a90e0c03d062	BRCA_Primary_Tumor	Training Set
0eddef62-9e5a-4ed7-a319-9462514bd162	BRCA_Primary_Tumor	Training Set
c2864531-cbf6-41a1-87dc-d166ebf8b962	BRCA_Primary_Tumor	Training Set
83f80e90-6546-4545-8b4e-f1bcecf77362	BRCA_Primary_Tumor	Training Set
10986c8d-d75f-4a89-8d0f-9842ba9d1263	BRCA_Primary_Tumor	Training Set
e5635af5-62de-4c8a-9da7-93832ee14564	BRCA_Primary_Tumor	Training Set
6e449869-a14b-4fde-9664-6632e92ad565	BRCA_Metastatic	Training Set
f53c3d33-7501-46e1-8125-56fb73083b65	BRCA_Primary_Tumor	Training Set
89b17c49-bf29-4ccb-a4f0-be994beb4265	BRCA_Primary_Tumor	Training Set
62317c69-f03b-4622-b4bd-a99b88d3f665	BRCA_Primary_Tumor	Training Set
04bad3d4-22f8-463e-a191-77901eb17f65	BRCA_Primary_Tumor	Training Set
3aef20b4-1c89-49c5-9920-e6fd0bf60665	BRCA_Primary_Tumor	Training Set
18dd7b03-138a-4c36-88e1-aeabb3760b66	BRCA_Primary_Tumor	Training Set
38b0c53a-af60-4610-a6a6-360550059966	BRCA_Primary_Tumor	Training Set
22cb86f1-88b4-405a-b20f-a29694950367	BRCA_Primary_Tumor	Training Set
4a47b575-d714-42de-991a-e4841da0bf67	BRCA_Primary_Tumor	Training Set
c63b843a-e3b3-4714-a0a2-ab93da5a4c67	BRCA_Primary_Tumor	Training Set
ff3769db-0958-4f3e-aea8-db70149d0a67	BRCA_Primary_Tumor	Training Set
cbf5849b-94ea-495e-9247-3012baa96267	BRCA_Primary_Tumor	Training Set
59705c6b-02f5-4e49-ae4c-f2510112fe67	BRCA_Primary_Tumor	Training Set
a68dd961-6d02-4e6c-a5c1-5a9f45ca4668	BRCA_Primary_Tumor	Training Set
0cde4402-e1ac-4b6b-a000-f579f4c2d168	BRCA_Primary_Tumor	Training Set
9076f647-71dc-4845-a893-e6628de65e68	BRCA_Primary_Tumor	Training Set
e286f56a-1719-409f-823c-da63da424f68	BRCA_Primary_Tumor	Training Set
1324c50e-3d79-48bb-bcde-28a0e5b73f68	BRCA_Primary_Tumor	Training Set
8ff6b0ab-c03c-4a06-a851-ebb4b0ffb769	BRCA_Primary_Tumor	Training Set
6923944c-7d5f-4c86-9eee-070ac00fe369	BRCA_Primary_Tumor	Training Set
91382c7f-7fec-4369-b1a4-60911a47c56a	BRCA_Primary_Tumor	Training Set
4c16b3ef-a6a7-4189-a709-d6af737dfd6a	BRCA_Primary_Tumor	Training Set
f6287cd9-00db-4b70-aa67-fe581d36306a	BRCA_Primary_Tumor	Training Set
37b9f568-aaf0-44b4-92bf-6e257ee6f06b	BRCA_Primary_Tumor	Training Set
0a7b187d-80f4-4cc7-ad85-f365d455df6b	BRCA_Primary_Tumor	Training Set
7a4c087e-9638-42f8-a438-0f5c4edcdc6c	BRCA_Primary_Tumor	Training Set
cef2bdb2-017f-4e90-94b3-45a91ac9fb6c	BRCA_Primary_Tumor	Training Set
5b527fb2-9de2-419a-9f62-989333449f6c	BRCA_Primary_Tumor	Training Set
117ab6a3-d288-4bd4-9271-47abb2f9c96d	BRCA_Primary_Tumor	Training Set
2944109a-96b6-4607-8d09-291aa680a16d	BRCA_Primary_Tumor	Training Set
2cdf0e6a-b2d3-491e-b5bd-7a3121af676d	BRCA_Primary_Tumor	Training Set
66d8eef3-27f2-4439-8f1b-e0665811b06e	BRCA_Primary_Tumor	Training Set
7b6863e0-1ad2-48d8-afd6-57e636fae26e	BRCA_Primary_Tumor	Training Set
cc47585f-e1f7-43c0-bd9a-af83fe879e6e	BRCA_Primary_Tumor	Training Set
3de60b02-74ea-4682-82df-ee3ef9aaea6f	BRCA_Primary_Tumor	Training Set
79641836-8684-4e1e-a8b1-935a6760cd6f	BRCA_Primary_Tumor	Training Set
3601ad2a-b827-42c3-b378-443bb3e36e6f	BRCA_Primary_Tumor	Training Set
9e781a09-cbb2-496a-b3f6-b1b8b514836f	BRCA_Primary_Tumor	Training Set
6070db25-079c-4bfa-889d-e4e447ceea70	BRCA_Primary_Tumor	Training Set
06ec98c4-892c-48b3-9421-a24c33c51c70	BRCA_Primary_Tumor	Training Set
eacf171d-5259-45ca-ba5b-137a47da4c71	BRCA_Primary_Tumor	Training Set
52bc932e-fe9b-49ff-8584-2f92e61d5871	BRCA_Primary_Tumor	Training Set
679ee059-ddd9-4138-9973-51a583941b71	BRCA_Primary_Tumor	Training Set
da35f73e-1856-41b6-994e-76919556c971	BRCA_Primary_Tumor	Training Set
1cbcd09f-2824-4e99-b657-f9565e9c9372	BRCA_Primary_Tumor	Training Set
62fbf3ae-bfca-4bac-9051-717e7844e272	BRCA_Primary_Tumor	Training Set
d182d919-c57f-4004-93db-fb1723a82072	BRCA_Primary_Tumor	Training Set
abde491b-056f-45c0-b53d-d21f7f12ab72	BRCA_Primary_Tumor	Training Set
6a927416-1e12-42e1-8f9d-16a570f34d73	BRCA_Primary_Tumor	Training Set
611393af-bc85-47f5-b66b-e3ef9941fc73	BRCA_Primary_Tumor	Training Set
01f79f80-1d82-4b0f-9ad6-c0b611f04b73	BRCA_Primary_Tumor	Training Set
e08f0600-73c6-4144-8af5-ec31097f0e74	BRCA_Primary_Tumor	Training Set
acb911bf-1ca0-4d19-b05b-0e6cee15b974	BRCA_Primary_Tumor	Training Set
16fa9305-8d86-4330-b932-07274b631574	BRCA_Primary_Tumor	Training Set
6506402f-5ab1-48bd-80f5-6d53c1a7f775	BRCA_Primary_Tumor	Training Set
2bb0e784-10fc-4978-b5f3-bfc197438175	BRCA_Primary_Tumor	Training Set
a52cc981-4203-4027-b978-383bfbeb5f75	BRCA_Primary_Tumor	Training Set
a4967738-7fc2-4270-a149-56e459edb875	BRCA_Primary_Tumor	Training Set
59e0deb0-c771-4fb9-a823-6fb7b5cba876	BRCA_Primary_Tumor	Training Set
e0215e64-2787-40c4-a8bc-8c26118bae76	BRCA_Primary_Tumor	Training Set
c6f4ef8f-353c-463e-8069-fdeacf556176	BRCA_Primary_Tumor	Training Set
4378b8bb-c513-4cc2-b06e-8270fed24576	BRCA_Primary_Tumor	Training Set
458922b4-db70-459b-8696-f8dd7b373a77	BRCA_Primary_Tumor	Training Set
d8dcd080-5bb7-4723-8714-443eb8b07477	BRCA_Primary_Tumor	Training Set
54e008d9-5e13-4969-b03c-6655b570ed77	BRCA_Primary_Tumor	Training Set
c9a64139-06c9-4154-b8ad-9c6959696977	BRCA_Primary_Tumor	Training Set
5537e19f-1361-447e-b207-329363f9f777	BRCA_Primary_Tumor	Training Set
f05c2816-d1c7-42a1-9ad4-ad787b256d78	BRCA_Primary_Tumor	Training Set
b17ba902-d97d-47d7-a33c-e31718c50778	BRCA_Primary_Tumor	Training Set
59c375b4-60fb-4598-a146-5b175c2b8079	BRCA_Primary_Tumor	Training Set
e07b4c18-8cb4-4006-935e-c5036b5e1879	BRCA_Primary_Tumor	Training Set
6f77d195-0c77-4860-8142-3cacde1f3279	BRCA_Primary_Tumor	Training Set
22139565-60e2-4a36-8b8a-832f459af87a	BRCA_Primary_Tumor	Training Set
7f03386b-190b-46f9-9f96-9b867bee9c7a	BRCA_Primary_Tumor	Training Set
c90561af-452d-47ca-bc9b-3a0e1eca417b	BRCA_Primary_Tumor	Training Set
e65d0b66-b1d6-40e2-916e-990522ad7e7b	BRCA_Primary_Tumor	Training Set
9a4eaf94-a637-4054-9792-6ca42294bc7b	BRCA_Primary_Tumor	Training Set
c2d1befc-422c-46a1-857a-13eb87f0657c	BRCA_Primary_Tumor	Training Set
babcc02f-9aa4-468f-8829-e605afea8c7c	BRCA_Primary_Tumor	Training Set
9cd9cf8f-31ac-414d-ad37-1669bb56547c	BRCA_Primary_Tumor	Training Set
e898dc9e-5ca7-4092-b6c2-4c541c4b767c	BRCA_Primary_Tumor	Training Set
d0027a32-a9e2-41df-9b47-76bc9fbcdb7c	BRCA_Primary_Tumor	Training Set
76af5aba-5a99-4c9b-8ac0-19f902fd887d	BRCA_Primary_Tumor	Training Set
fd476524-e22c-44a1-8f91-2a8a0519aa7d	BRCA_Primary_Tumor	Training Set
b081b69f-bb9c-4e5a-89a4-2842fe2e557d	BRCA_Primary_Tumor	Training Set
5b565b8a-68a0-42da-9010-a7f00b638f7d	BRCA_Primary_Tumor	Training Set
dd138ff8-d54f-4a77-aaf7-dbfea3beb17d	BRCA_Primary_Tumor	Training Set
cf6af5e1-ed9c-4cd2-8c29-5d002ef59b7d	BRCA_Primary_Tumor	Training Set
a65f91d7-a961-42e8-b20f-25128a6bb37d	BRCA_Primary_Tumor	Training Set
1109f6d7-0ed1-4be3-aa63-71e7da82d57e	BRCA_Primary_Tumor	Training Set
ba1d9bf5-f4ab-40b0-8e2f-fe406afcc77e	BRCA_Primary_Tumor	Training Set
9bbada51-d827-4eea-af45-47d7b5ba137e	BRCA_Primary_Tumor	Training Set
48023df3-770b-4c9e-9eba-ac5586eda57f	BRCA_Primary_Tumor	Training Set
d42b7981-3d8e-4233-b90d-f2b8a9c04d7f	BRCA_Primary_Tumor	Training Set
9f992be8-400e-4230-ac42-e5483b4a5f7f	BRCA_Primary_Tumor	Training Set
46c4652a-ac2b-41db-a17d-02625822027f	BRCA_Primary_Tumor	Training Set
c68a0a08-0c16-4b8a-9da8-af167ab1d67f	BRCA_Primary_Tumor	Training Set
7125b861-75f8-4119-8fb1-2f7b81413780	BRCA_Primary_Tumor	Training Set
b7971e42-45f6-4f58-a97e-e6d97e8a9880	BRCA_Primary_Tumor	Training Set
b5483af7-880c-4029-9c5b-90eb97408580	BRCA_Primary_Tumor	Training Set
65a2464f-07e0-4cf4-a1b3-3dda2889ad81	BRCA_Primary_Tumor	Training Set
90a48928-0338-4887-bded-6674011f9881	BRCA_Primary_Tumor	Training Set
9e21a804-3f57-453f-8117-4b5262bf8b81	BRCA_Primary_Tumor	Training Set
0783ff5e-f78d-49ac-8f8e-fc27c3673f81	BRCA_Primary_Tumor	Training Set
2efd38f9-54ae-4e93-9a46-cb7e24be4481	BRCA_Primary_Tumor	Training Set
6d5de1af-e8c0-46bc-8f78-97f57489b081	BRCA_Primary_Tumor	Training Set
cabbce72-a7cf-452e-9dc3-eb48ed23df82	BRCA_Primary_Tumor	Training Set
45c2cef7-58b5-4e76-abf6-8b88088c6c82	BRCA_Primary_Tumor	Training Set
ca6d11cc-6933-4eeb-a3b2-b364608abf82	BRCA_Primary_Tumor	Training Set
84314004-2ee2-4aa9-b9de-b6ef7db3fe82	BRCA_Primary_Tumor	Training Set
1bfa2c76-884b-4bd0-b800-4e4e0918f183	BRCA_Primary_Tumor	Training Set
2e125727-43f2-4a9d-8aa7-5d501240c883	BRCA_Primary_Tumor	Training Set
8aaa142f-ee1b-4124-9327-2f6b968fb183	BRCA_Primary_Tumor	Training Set
a1ad6e6b-270d-4c2d-9092-b18099ee1783	BRCA_Primary_Tumor	Training Set
ffea5a94-3ff5-435d-a24f-ebf0b3674683	BRCA_Primary_Tumor	Training Set
20c67226-bef8-4098-87a0-6ef7b612a284	BRCA_Primary_Tumor	Training Set
c0dc6757-e0cd-4615-9543-a348500aae84	BRCA_Primary_Tumor	Training Set
9c3a3cb7-dd86-48c6-ade1-f37455601984	BRCA_Primary_Tumor	Training Set
ceb674a6-b8ae-4245-af6e-83030d514b84	BRCA_Primary_Tumor	Training Set
c6e86718-2005-4b9a-af82-0dcbf74ada85	BRCA_Primary_Tumor	Training Set
6595a271-8731-4e64-8033-2bc24907b585	BRCA_Primary_Tumor	Training Set
29b6a9ce-d0cc-4c2f-828c-86d840585985	BRCA_Primary_Tumor	Training Set
4cad9ca3-d09d-4576-b41c-24144db97385	BRCA_Primary_Tumor	Training Set
04c60003-5d6d-45ea-957c-e54aacac7485	BRCA_Primary_Tumor	Training Set
22a5e04d-a9a8-4c13-8a13-9bdbeb357686	BRCA_Primary_Tumor	Training Set
f2891ace-f170-4dbf-b23e-a7cc21414786	BRCA_Primary_Tumor	Training Set
c079cc60-a420-4f66-8b9c-32dc51c49986	BRCA_Primary_Tumor	Training Set
5abfce32-00c9-47ea-b455-abfcb79ac587	BRCA_Primary_Tumor	Training Set
4a24493b-b019-4c20-ab5f-9ddb9739ff87	BRCA_Primary_Tumor	Training Set
4adca409-be37-4ebf-a9b0-c80f587e2088	BRCA_Primary_Tumor	Training Set
703ea797-79e6-4ace-8717-ff1f3a9bb888	BRCA_Primary_Tumor	Training Set
d9b83390-c155-4703-a0bb-78e84d53ba88	BRCA_Primary_Tumor	Training Set
d7877cdd-a69b-4d4c-bb62-d279e18dbf88	BRCA_Primary_Tumor	Training Set
e06668e3-03b5-4e17-9e22-40d5734af988	BRCA_Primary_Tumor	Training Set
dfe29d4c-1564-4c22-bfb4-6b69a830f788	BRCA_Primary_Tumor	Training Set
b1627372-85e8-4d0e-baaf-feec24249a89	BRCA_Primary_Tumor	Training Set
879f6c9b-b821-47d8-85f0-3965c0b16289	BRCA_Primary_Tumor	Training Set
f5afe112-281e-43ac-9662-e2de331f7789	BRCA_Primary_Tumor	Training Set
49b4cdad-26fb-4b62-aea7-7db13f13c389	BRCA_Primary_Tumor	Training Set
1a75a0b1-79a3-4343-87ce-15d7aeda5f89	BRCA_Primary_Tumor	Training Set
533cfa6a-c250-4f52-8637-0a77c398c78a	BRCA_Primary_Tumor	Training Set
c25b6919-5dc7-4a8a-97b0-8ee5128b868a	BRCA_Primary_Tumor	Training Set
27a33881-f497-4322-b24d-3af1e5e7ae8a	BRCA_Primary_Tumor	Training Set
e2cfc7b2-7c64-4776-bfb8-9682f745078b	BRCA_Primary_Tumor	Training Set
79afecac-c5cc-41af-9f0a-4cc3f5c6548b	BRCA_Primary_Tumor	Training Set
9c0d67be-07dc-494e-8b6f-69d74b93208b	BRCA_Primary_Tumor	Training Set
93152eec-61ab-4578-b668-fe503c1cbf8b	BRCA_Primary_Tumor	Training Set
59860a22-dcea-4871-8799-6f91a5d9c88c	BRCA_Primary_Tumor	Training Set
f6abc71a-0718-4b88-a17d-0ceda545778c	BRCA_Primary_Tumor	Training Set
5bd57419-1f9b-4535-9fe6-e155d2d8228d	BRCA_Primary_Tumor	Training Set
8631ada8-2cda-42f7-927e-76a24efa128d	BRCA_Primary_Tumor	Training Set
172944fc-5d14-491c-bd4a-f1eaae96a38d	BRCA_Primary_Tumor	Training Set
fbb65b75-a831-4616-8d6b-adba825a228d	BRCA_Primary_Tumor	Training Set
c3e23136-7190-4d08-991c-93afacc48e8d	BRCA_Primary_Tumor	Training Set
ea38585e-e393-4e7f-a2c1-64b33caf168d	BRCA_Primary_Tumor	Training Set
bd2081d7-90dd-4f9a-89c1-76d4322a1c8e	BRCA_Primary_Tumor	Training Set
e6901976-2075-463c-828d-8df924efc78e	BRCA_Primary_Tumor	Training Set
46563983-2b05-4eb7-9e15-07487565158f	BRCA_Primary_Tumor	Training Set
cdc7df8c-4e6c-4f00-ae33-f3eab6f1d08f	BRCA_Primary_Tumor	Training Set
9af9e9cf-2d77-455e-8d47-10537badd98f	BRCA_Primary_Tumor	Training Set
0e6ae036-64ed-4489-ae40-55f77089a890	BRCA_Primary_Tumor	Training Set
e9e3ef52-f293-4fd4-bb8d-c80b8d580e90	BRCA_Primary_Tumor	Training Set
c55e5045-85c6-4061-836b-5e5068b94990	BRCA_Primary_Tumor	Training Set
75f1e6b3-b296-49ae-b065-b4e39a986790	BRCA_Primary_Tumor	Training Set
4073d568-6777-45fe-97cd-22d8518fe991	BRCA_Primary_Tumor	Training Set
0776889f-4558-45a5-ae1c-3d8f23cf4b91	BRCA_Primary_Tumor	Training Set
7ed6588c-9071-4698-9876-1f7273591991	BRCA_Primary_Tumor	Training Set
902392b1-7533-4751-a3b1-58955b3eef91	BRCA_Primary_Tumor	Training Set
4b1a0809-0b28-4993-893d-1b7ef099de91	BRCA_Primary_Tumor	Training Set
10f2c028-06c5-4560-9a52-dd76a227b891	BRCA_Primary_Tumor	Training Set
933ea2ac-b473-40cd-ba4b-e8ea5c3dea92	BRCA_Primary_Tumor	Training Set
c392b91b-1f08-4e33-9ab7-42ec0fce3b92	BRCA_Primary_Tumor	Training Set
bbe71e31-d998-4559-8bd3-06943c89f492	BRCA_Primary_Tumor	Training Set
e547aed5-1579-4589-a683-d07cc0e51f93	BRCA_Primary_Tumor	Training Set
534b9e41-b731-4461-abea-30096148a493	BRCA_Primary_Tumor	Training Set
f7a29451-3212-44ff-96ff-6203ce7e7593	BRCA_Primary_Tumor	Training Set
14bebdf5-7509-4c8b-a944-aed580dffc93	BRCA_Primary_Tumor	Training Set
054b5cea-03f3-4747-90bc-12cfbb359393	BRCA_Primary_Tumor	Training Set
e43dade2-3a54-4fc5-a94a-70752288de94	BRCA_Primary_Tumor	Training Set
fb7499a6-0519-4d8a-b424-86c5cf382195	BRCA_Primary_Tumor	Training Set
766e0d2f-123b-474a-901c-f3cb25a92d95	BRCA_Primary_Tumor	Training Set
9e0bc893-3036-49ee-a807-957b90b2a195	BRCA_Primary_Tumor	Training Set
afa6298b-7dd3-4504-9251-b16d58c7ff96	BRCA_Primary_Tumor	Training Set
230082b7-39ec-4fe1-b3c6-daf35458f396	BRCA_Primary_Tumor	Training Set
5f2b9f6e-a2da-46b5-870b-667885226996	BRCA_Primary_Tumor	Training Set
efa7715f-aa27-4c5c-88b2-0c6b838de496	BRCA_Primary_Tumor	Training Set
6eaf8148-9ef1-4172-a7fe-b9fe7d747796	BRCA_Primary_Tumor	Training Set
7725ecef-ce7a-47c3-8f39-4a9582175497	BRCA_Primary_Tumor	Training Set
59ad0679-53de-4370-86ac-e3a9605f6997	BRCA_Primary_Tumor	Training Set
b42e31da-9804-498f-8b1a-6a550ac9b897	BRCA_Primary_Tumor	Training Set
1200af21-94cc-493a-85bd-70cc56f50497	BRCA_Primary_Tumor	Training Set
1e2b2f45-6629-41b3-8498-321a2e726698	BRCA_Primary_Tumor	Training Set
f2b501a8-2cc2-47ad-995e-4627ae10b398	BRCA_Primary_Tumor	Training Set
f15d5710-3511-4133-b307-43c0e5877498	BRCA_Primary_Tumor	Training Set
30774cd0-6f55-4e04-ae96-dbd729702499	BRCA_Primary_Tumor	Training Set
d4e6dc5c-510c-4431-935a-62105b691699	BRCA_Primary_Tumor	Training Set
af27fd0a-108c-47d2-9f87-665bed408e99	BRCA_Primary_Tumor	Training Set
eb667236-8f51-40a0-98e4-e27fa32b8999	BRCA_Primary_Tumor	Training Set
f014eca8-aa22-432c-b1ef-3113728b8899	BRCA_Primary_Tumor	Training Set
69b1e110-3733-4afc-b8dd-e21565c65899	BRCA_Primary_Tumor	Training Set
fdbd24ed-a293-4f84-a418-8ab531750e9a	BRCA_Primary_Tumor	Training Set
03c22fb8-0643-48fb-a09a-6119f722c09a	BRCA_Primary_Tumor	Training Set
9ad28303-1b3d-486e-a72b-15d27d71cf9a	BRCA_Metastatic	Training Set
bca58686-d36a-4625-968b-e837e1f2629b	BRCA_Primary_Tumor	Training Set
4ab84b93-4fb0-438f-aeed-5cec81e6589b	BRCA_Primary_Tumor	Training Set
2cc9fd5e-76c0-4241-8b75-0d8c037b969b	BRCA_Primary_Tumor	Training Set
4411941f-9a7c-4bff-86f3-26c959ed849b	BRCA_Primary_Tumor	Training Set
421c51e1-ba5f-4ffe-b4ed-39303113709b	BRCA_Primary_Tumor	Training Set
4ff799d9-202c-4f5a-bd58-495a23b3c39c	BRCA_Primary_Tumor	Training Set
71f8a28d-077a-4a91-b56e-b035e4861e9c	BRCA_Primary_Tumor	Training Set
cdb76c1d-da1b-4c52-871f-9c7f5833179c	BRCA_Primary_Tumor	Training Set
47ac991e-2472-4613-a0f0-fc4cad42bb9d	BRCA_Primary_Tumor	Training Set
079eaca1-0319-4b54-b20b-673f4576c69d	BRCA_Primary_Tumor	Training Set
a6cfd821-a749-4d12-8b80-927255aad39d	BRCA_Primary_Tumor	Training Set
7fae9ebb-0821-4077-abbc-bcfe3b139c9d	BRCA_Primary_Tumor	Training Set
91a45dff-d6c6-4a30-b79d-475dad0a609e	BRCA_Primary_Tumor	Training Set
8751d026-849b-44ed-933b-fd9b80de329e	BRCA_Primary_Tumor	Training Set
a7589115-6759-41f5-acda-185369ae599e	BRCA_Primary_Tumor	Training Set
e6056c84-d3db-491c-aae0-291991c1619f	BRCA_Primary_Tumor	Training Set
7e87cd79-d38c-448b-8d02-018b1e7efe9f	BRCA_Primary_Tumor	Training Set
2f5b0acb-4bb5-41c8-862f-6ceed8f498a0	BRCA_Primary_Tumor	Training Set
f3fd3dee-dd68-4e91-8c94-4593c582cba0	BRCA_Primary_Tumor	Training Set
992a7083-28ce-4857-898e-9d4b4fbf2fa1	BRCA_Primary_Tumor	Training Set
1f1c74d9-86f3-49ea-bb26-2c09efecc4a2	BRCA_Primary_Tumor	Training Set
ef446e5f-0f26-4719-bd24-f30167794ba2	BRCA_Primary_Tumor	Training Set
3676ff64-9f37-4ee8-84fd-84131dae04a2	BRCA_Primary_Tumor	Training Set
f5303c4b-7008-44af-8d22-0ba38750dea2	BRCA_Primary_Tumor	Training Set
ea2e8ecb-841c-4224-9468-ed2d649c31a3	BRCA_Primary_Tumor	Training Set
87c9f796-21d9-4b51-a129-0dddc39a06a3	BRCA_Primary_Tumor	Training Set
dc41e93d-7e9e-415f-9de7-349931d6dea3	BRCA_Primary_Tumor	Training Set
4d845308-2bea-47bd-bf18-e0b3ebcb81a4	BRCA_Primary_Tumor	Training Set
e21f5a7e-518f-4e33-8930-eb268fc168a4	BRCA_Primary_Tumor	Training Set
18c5bb3b-fc3b-472c-be3e-4348704befa4	BRCA_Primary_Tumor	Training Set
d0920958-b342-4844-9fd6-93f3784cf5a4	BRCA_Primary_Tumor	Training Set
a7b0203c-c5a8-45b3-a912-d403b2e479a4	BRCA_Primary_Tumor	Training Set
fa17e3dc-118f-4cd8-a79b-236a3776cca5	BRCA_Primary_Tumor	Training Set
6749b9dd-8ffb-4b09-978b-2599ebe654a5	BRCA_Primary_Tumor	Training Set
fcc10778-9575-41f4-bf95-4a97f7c58ba6	BRCA_Primary_Tumor	Training Set
ae0e8653-30eb-447a-ade5-17020d50b0a6	BRCA_Primary_Tumor	Training Set
3d669a28-e601-4579-a05d-8c58b76587a6	BRCA_Primary_Tumor	Training Set
2a54226f-50a1-466d-859a-6c64575fc0a7	BRCA_Primary_Tumor	Training Set
c1e11d37-82aa-444e-9b51-18bc378761a8	BRCA_Primary_Tumor	Training Set
6e0512bc-03e8-412a-8a99-55d5addd66a8	BRCA_Primary_Tumor	Training Set
26b1f23c-8bc2-42b5-924b-b51f25c84da9	BRCA_Primary_Tumor	Training Set
0c134ddc-fab0-4976-bb6a-8a48cb7ac4a9	BRCA_Primary_Tumor	Training Set
9b8afaed-70d4-4e61-85b3-bbced05ecfa9	BRCA_Primary_Tumor	Training Set
6d611ffa-4268-4c6e-aed8-42557405d6a9	BRCA_Primary_Tumor	Training Set
3a0e52d7-eb47-44a7-9c30-83bb42841aaa	BRCA_Primary_Tumor	Training Set
6559039d-b6f2-4bbb-b10c-dfbf22dbfcaa	BRCA_Primary_Tumor	Training Set
62da0a5e-df20-4422-b54a-53b41d9c3aab	BRCA_Primary_Tumor	Training Set
5c811b7b-0457-448e-b170-7abb4bb63cab	BRCA_Primary_Tumor	Training Set
31d88855-e509-48ac-818f-f817ebfb35ab	BRCA_Primary_Tumor	Training Set
a82bf67f-6b69-499a-8631-4101be9ba9ab	BRCA_Primary_Tumor	Training Set
56719fb4-48e8-4dc4-b3f0-6aade70276ab	BRCA_Primary_Tumor	Training Set
d526808b-7bb7-4e14-b5e2-91605bcea3ac	BRCA_Primary_Tumor	Training Set
896a84a3-f8a2-44c6-b48a-dbf887f8f5ac	BRCA_Primary_Tumor	Training Set
a442a0ee-153d-4033-af62-86955f3055ac	BRCA_Primary_Tumor	Training Set
a451ca06-e1bf-478b-9a50-a0d8c3d4a2ac	BRCA_Primary_Tumor	Training Set
dbecbce2-8aa9-46dd-bc74-06b18bef9dac	BRCA_Primary_Tumor	Training Set
c8d64135-1b75-428a-8c75-351d32009eac	BRCA_Primary_Tumor	Training Set
37cc38b2-2c87-4add-b8c7-a0d2343448ad	BRCA_Primary_Tumor	Training Set
1fd27945-2143-48be-9c77-dd82322863ad	BRCA_Primary_Tumor	Training Set
703e4f05-de97-44e1-b978-48a8dd03b9ad	BRCA_Primary_Tumor	Training Set
6a5431ea-bda1-495d-8e85-1bc09b6ce4ad	BRCA_Primary_Tumor	Training Set
c9f99b05-b169-47e5-94cd-545644fe78ad	BRCA_Primary_Tumor	Training Set
300d7f74-a627-4738-91a9-62778d98c5ad	BRCA_Primary_Tumor	Training Set
3d5e28a0-5c13-4049-8bf1-3ff107dd0dae	BRCA_Primary_Tumor	Training Set
a8d8311c-73c4-4806-a8ca-d275905fc1ae	BRCA_Primary_Tumor	Training Set
164252dd-3294-4420-86f1-44c4344039ae	BRCA_Primary_Tumor	Training Set
d7a583f5-736c-4461-ae6d-e464763154ae	BRCA_Primary_Tumor	Training Set
839d7d71-2360-4d8b-a935-67eebc2f92ae	BRCA_Primary_Tumor	Training Set
73835c8d-60bb-4001-80c6-2a7afd8709af	BRCA_Primary_Tumor	Training Set
3d635708-c72f-44c2-84e1-036cb2ddbfaf	BRCA_Primary_Tumor	Training Set
c2e78287-f440-4bcb-b9dc-c8cda71760b1	BRCA_Primary_Tumor	Training Set
57dabe72-0950-4301-be03-262f3916dbb1	BRCA_Primary_Tumor	Training Set
10848c09-8257-426b-aab6-eedcab1274b1	BRCA_Primary_Tumor	Training Set
1dd762b5-653d-4516-8215-1ced908182b2	BRCA_Primary_Tumor	Training Set
bfeea30b-9df7-46bc-bc83-3bf1ede95eb2	BRCA_Primary_Tumor	Training Set
aa0783ef-ea84-4b0b-8ea5-1600a85c9ab3	BRCA_Primary_Tumor	Training Set
479dca62-5053-4919-9d21-695298aa76b4	BRCA_Primary_Tumor	Training Set
ca3879fc-3b0e-457b-ba06-9a3efcfef6b4	BRCA_Primary_Tumor	Training Set
41951aff-344c-4b10-935c-6dcdbb54c5b4	BRCA_Primary_Tumor	Training Set
1bc37328-9c24-40d3-bb7b-000e0f562cb5	BRCA_Primary_Tumor	Training Set
f59c167d-5cbe-490c-8320-20f900c3dcb5	BRCA_Primary_Tumor	Training Set
d3e2d033-1203-4844-8559-aa34763d37b6	BRCA_Primary_Tumor	Training Set
0915dde6-5839-4705-8d9b-b01a6450feb6	BRCA_Primary_Tumor	Training Set
9b9c0eed-dc7d-45a4-8eb4-430aaf16fbb6	BRCA_Primary_Tumor	Training Set
2d82baf3-62a1-4b94-a806-f044b8595db6	BRCA_Primary_Tumor	Training Set
118b6525-67d8-4bf1-9b6b-6d22d52e06b6	BRCA_Primary_Tumor	Training Set
9bffa41c-8d78-4077-9343-a124b370c8b6	BRCA_Primary_Tumor	Training Set
2ac38cda-108e-4553-893f-f36211922bb6	BRCA_Primary_Tumor	Training Set
d9284565-a153-49d8-8e01-a90eca817db7	BRCA_Primary_Tumor	Training Set
2e769651-670d-4672-bcb7-dcda48db5eb7	BRCA_Primary_Tumor	Training Set
2f86d512-9177-45ac-b724-bbc31d83cdb7	BRCA_Primary_Tumor	Training Set
f16fe955-9a7c-43c1-9f74-3d9d69c5e1b7	BRCA_Primary_Tumor	Training Set
ae483bd4-01d6-4cdb-bb2c-1763a5101ab7	BRCA_Primary_Tumor	Training Set
9efb4d56-8ada-4280-bb76-b5746e4335b8	BRCA_Primary_Tumor	Training Set
842f6668-669f-4e7d-89f6-f6da627297b8	BRCA_Primary_Tumor	Training Set
fa4cc864-9edd-4843-88f0-956aaecb53b8	BRCA_Primary_Tumor	Training Set
6e6f790e-7b1d-4dc7-aa70-84c0680020b8	BRCA_Primary_Tumor	Training Set
1835a17a-8710-47c8-b5b3-986cfd50c8b8	BRCA_Primary_Tumor	Training Set
2ef74f93-5da2-454c-aca2-d86c289eacb8	BRCA_Primary_Tumor	Training Set
b906958a-334b-4e82-ad9b-0b94dbf8dfb9	BRCA_Primary_Tumor	Training Set
c559d965-1125-4cf6-8205-4286ab6aa3b9	BRCA_Primary_Tumor	Training Set
6c837ca9-9e6e-4417-a540-99cd3740c5b9	BRCA_Primary_Tumor	Training Set
79a4ea16-b871-4932-b1f4-169004233cba	BRCA_Primary_Tumor	Training Set
1e122aa0-1ca9-4f1b-823e-68d21d9b50ba	BRCA_Primary_Tumor	Training Set
9f6360e2-1df2-4459-9103-5073926e93ba	BRCA_Primary_Tumor	Training Set
d06d5373-6a1b-474c-9279-10fcb29f59ba	BRCA_Primary_Tumor	Training Set
be04fdc1-6eac-4877-abf3-cdec248eebbb	BRCA_Primary_Tumor	Training Set
020873c7-93d7-4eea-b25f-60663417d9bb	BRCA_Primary_Tumor	Training Set
37b29806-fbd6-432f-9a47-ce72bee3a5bb	BRCA_Primary_Tumor	Training Set
6e218cc2-0437-4d31-8d22-7d15f63297bb	BRCA_Primary_Tumor	Training Set
997b8112-5484-49ca-bf3d-7aa6cd2fb8bc	BRCA_Primary_Tumor	Training Set
6e3cc012-2192-48b5-bd38-92ccda12a0bc	BRCA_Primary_Tumor	Training Set
0ccc440d-022a-4f6f-a96e-77e0e6c8abbc	BRCA_Primary_Tumor	Training Set
29d55f13-d78d-45f1-8fdf-65733c69f1bc	BRCA_Primary_Tumor	Training Set
61778a82-2f7e-4b5e-9503-a7ba2ddfb9bd	BRCA_Primary_Tumor	Training Set
79a8f606-9a9b-45f4-99e2-61b8498ab4bd	BRCA_Primary_Tumor	Training Set
d4137836-3f03-4a66-a7e1-1a735b289cbd	BRCA_Primary_Tumor	Training Set
d89ae0be-8a3b-427f-84c0-6cce2f7b4cbe	BRCA_Primary_Tumor	Training Set
cb8e1e32-91db-4b35-9556-f6537f64bcbe	BRCA_Primary_Tumor	Training Set
ec9f355e-90fa-42de-a35e-ec6a2d5ea1be	BRCA_Primary_Tumor	Training Set
aaa54a0c-f437-4e0e-ae39-977bebd517bf	BRCA_Primary_Tumor	Training Set
0f36cdef-61e7-4627-aaf6-59a7cb2d16bf	BRCA_Primary_Tumor	Training Set
5516dd59-3d95-4bc6-84e7-5719b1bbcabf	BRCA_Primary_Tumor	Training Set
b4604353-ec2d-4ff5-91c1-faedb89f6bc0	BRCA_Primary_Tumor	Training Set
f694d119-bf58-4449-a811-cb7a2165d8c0	BRCA_Primary_Tumor	Training Set
babd334d-8eeb-4cc1-af95-c024dcdbd3c1	BRCA_Primary_Tumor	Training Set
d6d374ce-aafb-4388-80af-900a9d19aec1	BRCA_Primary_Tumor	Training Set
442cfb48-2665-4404-889d-3626442670c1	BRCA_Primary_Tumor	Training Set
812e8e8f-71b2-49db-ac1f-fa3761cb3bc1	BRCA_Primary_Tumor	Training Set
a426ab8d-d15c-42b9-bf81-a3ca7dbae8c1	BRCA_Primary_Tumor	Training Set
79253a9a-6ebf-490c-b976-505880669cc2	BRCA_Primary_Tumor	Training Set
826328ef-7687-4480-bda5-6d49f72223c2	BRCA_Primary_Tumor	Training Set
ba22d7e6-3e70-4a43-9dc1-59069b39e8c2	BRCA_Primary_Tumor	Training Set
8b67d4ef-bca7-4184-86c3-9dd50b8dc2c3	BRCA_Primary_Tumor	Training Set
eb3aa089-6c7a-4e61-8de3-2a59bca43cc4	BRCA_Primary_Tumor	Training Set
5e4afb9b-9141-40c1-a86e-42d5b74930c4	BRCA_Primary_Tumor	Training Set
[truncated: 9,416 more rows]

## Sheet: Staging Prediction
Table S5 Cancer Staging Prediction
[truncated: 7,612 more rows]

[truncated: 1 more sheets: Survival Prediction]
